# Supplementary material for: Structural Investigation of Aaptourinamine by a Novel Module-Assembly-Based Calculation
Source: MDPI journal article supplement (doi:10.3390/md20100649), 2022-10-20
Supplement: s1 [file s1]

# Supporting Information

## Structural Investigation of Aaptourinamine by a Novel Module-Assembly-Based Calculation

Xing Shi <sup>1,2,†</sup>, Zhihui Wu <sup>1,2,†</sup>, Tianyun Jin <sup>1,2</sup>, Cili Wang <sup>1,2</sup> and Pinglin Li <sup>1,2,\*</sup>

<sup>1</sup>Key Laboratory of Marine Drugs, Chinese Ministry of Education, School of Medicine and Pharmacy Department, Ocean University of China, Qingdao 266003, China

<sup>2</sup>Laboratory of Marine Drugs and Biological Products, Pilot National Laboratory for Marine Science and Technology (Qingdao), Qingdao 266003, China

<sup>†</sup>These authors have contributed equally to this work and share first authorship

\*Correspondence: [lipinglin@ouc.edu.cn](mailto:lipinglin@ouc.edu.cn)

## Table of Contents

|                                                                                            |    |
|--------------------------------------------------------------------------------------------|----|
| 1. Methods for calculation in Doerafa.....                                                 | 3  |
| 2. Mata-groups and meta-structures of aaptourinamine.....                                  | 3  |
| 2.1 Core structures according to experimental data of aaptourinamine.....                  | 3  |
| 2.2 The connection site counting principle for aaptourinamine takes A-a as an example..... | 3  |
| 2.3 Meta-groups and meta-structures of aaptourinamine .....                                | 3  |
| 3. The structural data groups for aaptourinamine.....                                      | 5  |
| 4. The structures converted from the data groups.....                                      | 21 |
| 5. Calculated detail for DFT-GIAO .....                                                    | 23 |
| 6. Experimental NMR data of aaptourinamine.....                                            | 33 |
| 7. Experimental spectra of aaptourinamine .....                                            | 34 |
| Reference.....                                                                             | 37 |

## 1. Methods for calculation in Dooerafa

The meta-groups were deduced on the basis of experimental data, and the meta-structures were assembled by the grafting method to make the connection points less than 14 for saving time. Then the original procedure code which was written by Python is expected to assemble the meta-groups based on meta-structures to shape up all the structures which were converted from the group data and were drawn manually. The InChI key of each structure was obtained in Excel embedded Chemoffice 14. The duplicates were removed according to the InChI code. The molecular energy calculation in the mechanic force field was performed by Python controlling Microsoft Excel containing all the structures and Chem 3D, which was provided as Supplementary Data 1. The conformational search was performed on Maestro 11.9 of the Schrödinger software package [32]. DFT-GIAO calculation of  $^1\text{H}$  and  $^{13}\text{C}$  NMR data were performed on Gaussian 16 at PCM/mPW1PW91/6-31+G\*\* level [33]. The total times consumed for both structure determinations were about 3-4 days. The original procedure code and DFT calculation were performed in Supercomputing Center in Pilot National Laboratory for Marine Science and Technology (Qingdao). Details of the software codes used are available from the corresponding author on reasonable request. Codes used to calculate and analyze data about Dooerafa are provided as Supplementary Data 2 (review only).

## 2. Mata-groups and meta-structures of aaptourinamine

### 2.1 Core structures according to experimental data of aaptourinamine

Four core structures were deduced from the experimental data of aaptourinamine including of  $^1\text{H}$  and  $^{13}\text{C}$  NMR, and especially  $^1\text{H}$ - $^1\text{H}$  COSY, HMQC, and HMBC spectral data. The core structure D is not reasonable because of the high deshielded chemical shift of the carbonyl group at more than  $\delta_{\text{C}}180$ , much bigger than the practical 168.8.

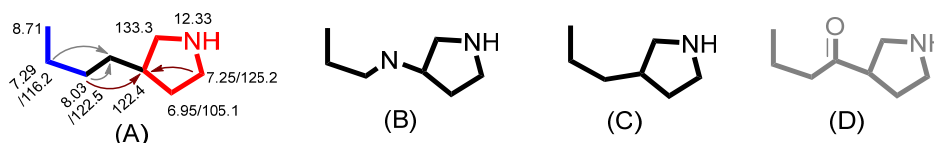

Figure S1. Core structures A-D for aaptourinamine

### 2.2 The connection site counting principle for aaptourinamine takes A-a as an example

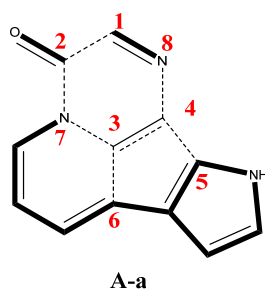

$$\text{Connection points of A-a} = 1_{\text{C1}} + 2_{\text{C2}} + 3_{\text{C3}} + 3_{\text{C4}} + 1_{\text{C5}} + 1_{\text{C6}} + 2_{\text{C7}} + 1_{\text{C8}} = 14$$

Figure S2. The counting principle of the connection site

### 2.3 Meta-groups and meta-structures of aaptourinamine

The meta-groups include one carbonyl group, one imine group, and several olefinic carbons including of CH and C. And the meta-groups depend on each core structure. Thus, there are 14 meta-structures for the core structure A, 14 meta-structures for the core structure B, and 16 meta-structures for the core structure C. To decrease the connection points less than 14, some meta-structures were shaped up by connecting two additional bonds as shown in A-c, A-c1, A-e, and so on. Because the meta-structures are different from each other, each has different connection point serial numbers.

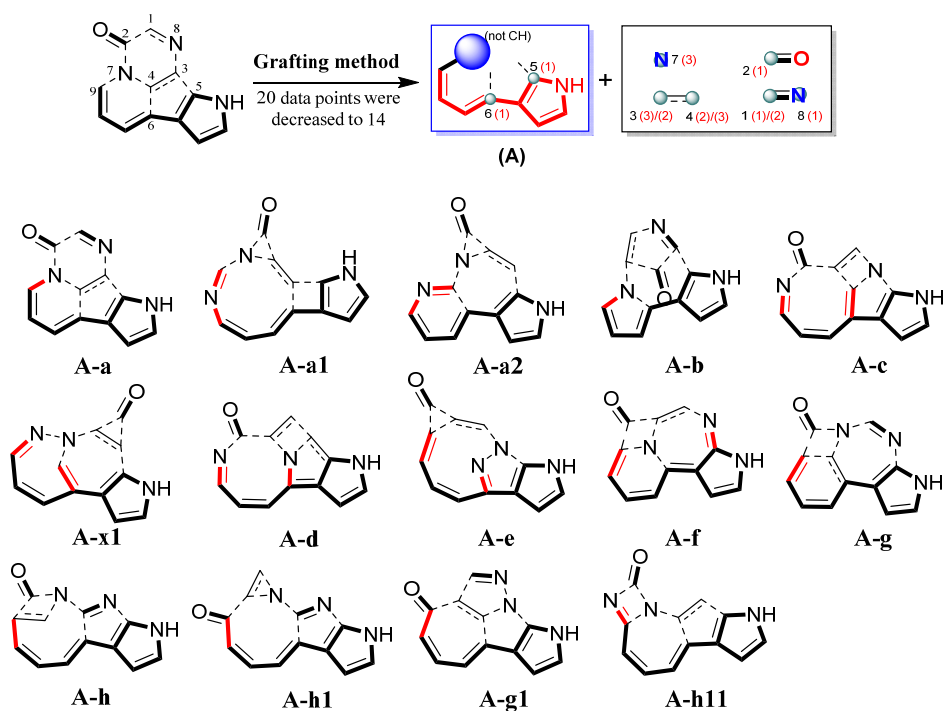

Figure S3. 14 meta-structures for the core structure A

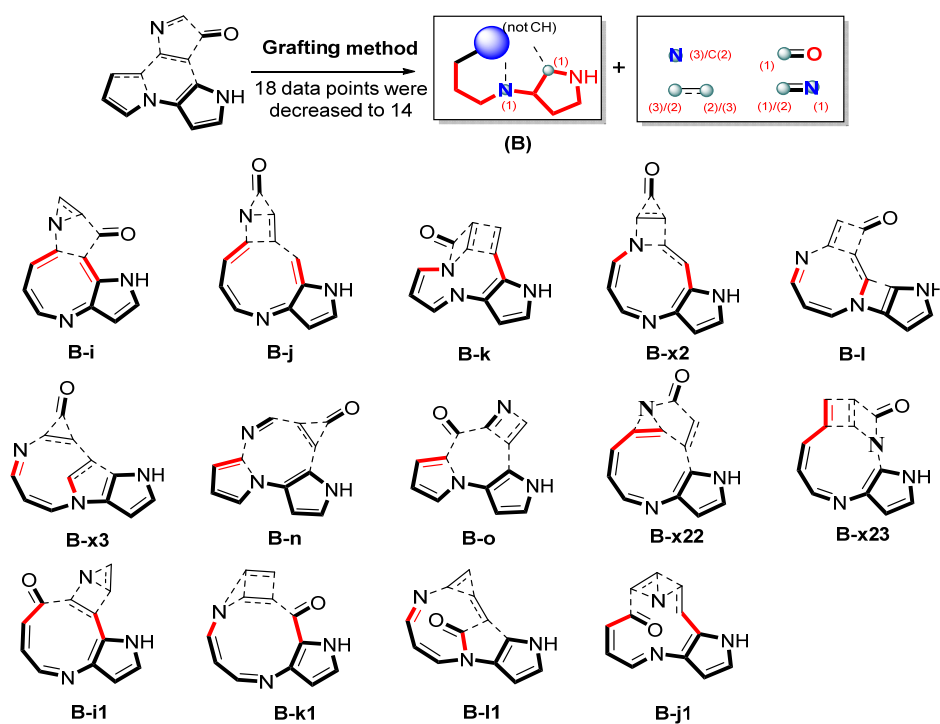

Figure S4. 14 meta-structures for the core structure B



[[1, 7], [2, 3], [2, 4], [3, 4], [3, 8], [4, 6], [5, 7],  
[[1, 7], [2, 3], [2, 4], [3, 4], [3, 8], [4, 7], [5, 6],  
[[1, 7], [2, 3], [2, 5], [3, 4], [3, 6], [4, 7], [4, 8],  
[[1, 7], [2, 3], [2, 5], [3, 4], [3, 7], [4, 6], [4, 8],  
[[1, 7], [2, 3], [2, 5], [3, 4], [3, 8], [4, 6], [4, 8],  
[[1, 7], [2, 3], [2, 6], [3, 4], [3, 5], [4, 7], [4, 8],  
[[1, 7], [2, 3], [2, 6], [3, 4], [3, 7], [4, 5], [4, 8],  
[[1, 7], [2, 3], [2, 6], [3, 4], [3, 8], [4, 5], [4, 7],  
[[1, 7], [2, 3], [2, 7], [3, 4], [3, 5], [4, 6], [4, 8],  
[[1, 7], [2, 3], [2, 7], [3, 4], [3, 6], [4, 5], [4, 8],  
[[1, 7], [2, 3], [2, 7], [3, 4], [3, 8], [4, 5], [4, 6],  
[[1, 7], [2, 3], [2, 8], [3, 4], [3, 5], [4, 6], [4, 7],  
[[1, 7], [2, 3], [2, 8], [3, 4], [3, 7], [4, 5], [4, 6],  
[[1, 7], [2, 4], [2, 5], [3, 4], [3, 6], [3, 7], [4, 8],  
[[1, 7], [2, 4], [2, 5], [3, 4], [3, 7], [3, 8], [4, 6],  
[[1, 7], [2, 4], [2, 6], [3, 4], [3, 5], [3, 7], [4, 8],  
[[1, 7], [2, 4], [2, 6], [3, 4], [3, 5], [3, 8], [4, 7],  
[[1, 7], [2, 4], [2, 6], [3, 4], [3, 7], [3, 8], [4, 5],  
[[1, 7], [2, 4], [2, 7], [3, 4], [3, 5], [3, 6], [4, 8],  
[[1, 7], [2, 4], [2, 7], [3, 4], [3, 5], [3, 8], [4, 6],  
[[1, 7], [2, 4], [2, 7], [3, 4], [3, 6], [3, 8], [4, 5],  
[[1, 7], [2, 4], [2, 8], [3, 4], [3, 5], [3, 6], [4, 7],  
[[1, 7], [2, 4], [2, 8], [3, 4], [3, 5], [3, 7], [4, 6],  
[[1, 7], [2, 4], [2, 8], [3, 4], [3, 6], [3, 7], [4, 5]]

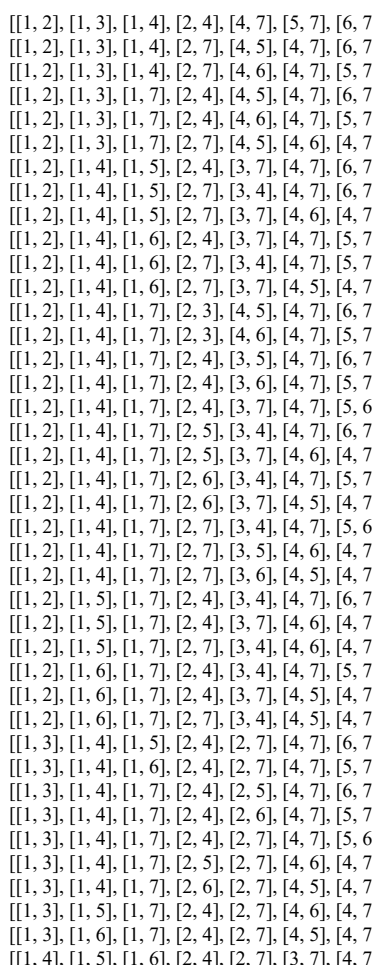

$[[1, 4], [1, 5], [1, 7], [2, 3], [2, 4], [4, 7], [6, 7]$   
 $[[1, 4], [1, 5], [1, 7], [2, 3], [2, 7], [4, 6], [4, 7]$   
 $[[1, 4], [1, 5], [1, 7], [2, 4], [2, 6], [3, 7], [4, 7]$   
 $[[1, 4], [1, 5], [1, 7], [2, 6], [2, 7], [3, 6], [4, 7]$   
 $[[1, 4], [1, 5], [1, 7], [2, 3], [2, 7], [3, 4], [4, 7]$   
 $[[1, 4], [1, 6], [1, 7], [2, 6], [2, 4], [4, 7], [5, 7]$   
 $[[1, 4], [1, 6], [1, 7], [2, 3], [2, 7], [4, 5], [4, 7]$   
 $[[1, 4], [1, 6], [1, 7], [2, 4], [2, 5], [3, 7], [4, 7]$   
 $[[1, 4], [1, 6], [1, 7], [2, 4], [2, 7], [3, 5], [4, 7]$   
 $[[1, 4], [1, 6], [1, 7], [2, 5], [2, 7], [3, 4], [4, 7]$   
 $[[1, 5], [1, 6], [1, 7], [2, 4], [2, 7], [3, 4], [4, 7]]$

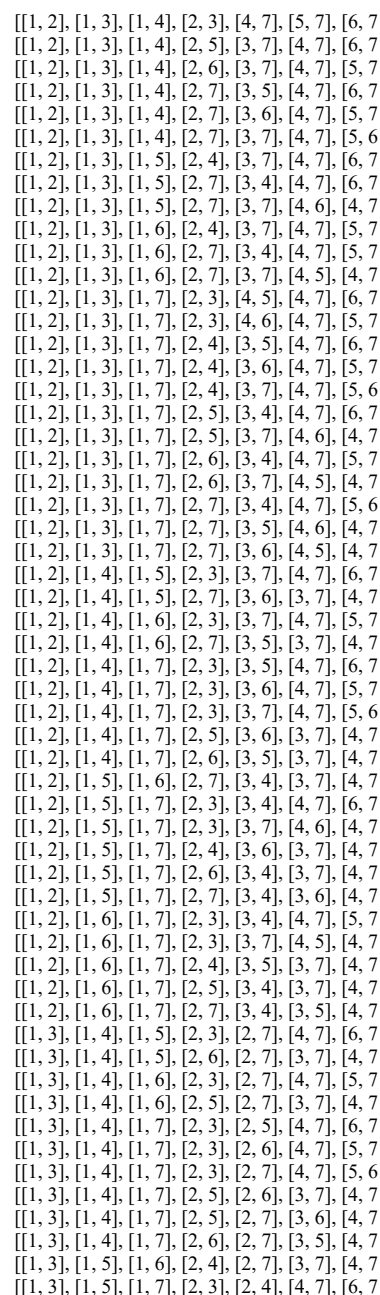



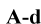

A-e

The chemical structure shows a fused bicyclic system consisting of a benzene ring and an indole ring. The atoms are numbered as follows: 1 is the carbonyl carbon, 2 is the carbon adjacent to it, 3 is the nitrogen atom, 4 is the carbon at the bottom left, 5 is the carbon at the bottom right, 6 is the nitrogen atom, and 7 is the nitrogen atom in the indole ring. The structure includes a carbonyl group (C=O) and a double bond between the two rings.

## A-f

A-g

[[[1, 2], [1, 3], [2, 3], [3, 4], [5, 7], [6, 7], [7, 8]  
[[1, 2], [1, 3], [2, 5], [3, 4], [3, 7], [6, 7], [7, 8]  
[[1, 2], [1, 3], [2, 6], [3, 4], [3, 7], [5, 7], [7, 8]  
[[1, 2], [1, 3], [2, 7], [3, 4], [3, 5], [6, 7], [7, 8]  
[[1, 2], [1, 3], [2, 7], [3, 4], [3, 6], [5, 7], [7, 8]  
[[1, 2], [1, 3], [2, 7], [3, 4], [3, 7], [5, 6], [7, 8]  
[[1, 2], [1, 3], [2, 7], [3, 4], [3, 7], [5, 8], [6, 7]  
[[1, 2], [1, 3], [2, 7], [3, 4], [3, 8], [5, 7], [6, 7]  
[[1, 2], [1, 3], [2, 8], [3, 4], [3, 7], [5, 7], [6, 7]  
[[1, 2], [1, 5], [2, 3], [3, 4], [3, 7], [6, 7], [7, 8]  
[[1, 2], [1, 5], [2, 7], [3, 4], [3, 6], [3, 7], [7, 8]  
[[1, 2], [1, 5], [2, 7], [3, 4], [3, 7], [3, 8], [6, 7]  
[[1, 2], [1, 6], [2, 3], [3, 4], [3, 7], [5, 7], [7, 8]  
[[1, 2], [1, 6], [2, 7], [3, 4], [3, 5], [3, 7], [7, 8]  
[[1, 2], [1, 6], [2, 7], [3, 4], [3, 7], [3, 8], [5, 7]  
[[1, 2], [1, 7], [2, 3], [3, 4], [3, 5], [6, 7], [7, 8]  
[[1, 2], [1, 7], [2, 3], [3, 4], [3, 6], [5, 7], [7, 8]  
[[1, 2], [1, 7], [2, 3], [3, 4], [3, 7], [5, 6], [7, 8]  
[[1, 2], [1, 7], [2, 3], [3, 4], [3, 7], [5, 8], [6, 7]  
[[1, 2], [1, 7], [2, 3], [3, 4], [3, 8], [5, 7], [6, 7]



**A-h**

[illegible]

9

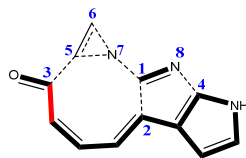[illegible][illegible]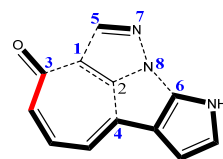[illegible]

[illegible][illegible]



$[[1, 2], [1, 3], [2, 3], [2, 4], [3, 4], [4, 6], [5, 7]$   
 $[[1, 2], [1, 3], [2, 3], [2, 4], [3, 5], [4, 6], [4, 7]$   
 $[[1, 2], [1, 3], [2, 3], [2, 4], [3, 7], [4, 5], [4, 6]$   
 $[[1, 2], [1, 3], [2, 3], [2, 5], [3, 4], [4, 6], [4, 7]$   
 $[[1, 2], [1, 3], [2, 3], [2, 7], [3, 4], [4, 5], [4, 6]$   
 $[[1, 2], [1, 3], [2, 4], [2, 5], [3, 4], [3, 6], [4, 7]$   
 $[[1, 2], [1, 3], [2, 4], [2, 7], [3, 4], [3, 6], [4, 5]$

[illegible]



[[1, 6], [1, 8], [2, 4], [2, 5], [2, 6], [3, 5], [5, 7]  
[[1, 6], [1, 8], [2, 4], [2, 5], [2, 7], [3, 5], [5, 6]  
[[1, 6], [1, 8], [2, 5], [2, 6], [2, 7], [3, 5], [4, 5]  
[[1, 7], [1, 8], [2, 3], [2, 5], [2, 6], [4, 5], [5, 6]  
[[1, 7], [1, 8], [2, 4], [2, 5], [2, 6], [3, 5], [5, 6]]]

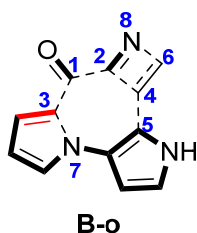[illegible]



**B-i1**

**B-k1**

$$\begin{aligned} & [[1, 3], [1, 6], [2, 3], [2, 4], [2, 5], [3, 5], [5, 6] \\ & [[1, 3], [1, 6], [2, 3], [2, 5], [2, 6], [3, 5], [4, 5] \\ & [[1, 5], [1, 6], [2, 3], [2, 4], [2, 5], [3, 5], [3, 6] \\ & [[1, 5], [1, 6], [2, 3], [2, 5], [2, 6], [3, 4], [3, 5]] \end{aligned}$$
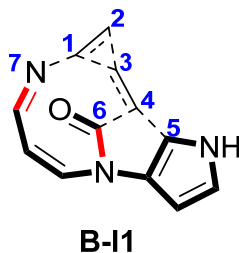

**B-j1**

$$\begin{aligned} & [[1, 2], [1, 3], [1, 6], [2, 3], [2, 6], [3, 4], [5, 6] \\ & [[1, 2], [1, 3], [1, 6], [2, 5], [2, 6], [3, 4], [3, 6] \\ & [[1, 2], [1, 5], [1, 6], [2, 3], [2, 6], [3, 4], [3, 6] \\ & [[1, 3], [1, 5], [1, 6], [2, 3], [2, 4], [2, 6], [3, 6]] \end{aligned}$$
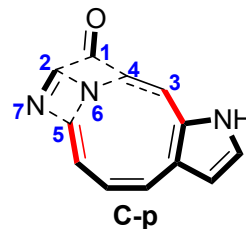

[[1, 2], [1, 4], [2, 5], [3, 4], [4, 6], [5, 6], [6, 7]  
 [[1, 2], [1, 4], [2, 6], [3, 4], [4, 5], [5, 6], [6, 7]  
 [[1, 2], [1, 4], [2, 6], [3, 4], [4, 6], [5, 6], [5, 7]  
 [[1, 2], [1, 5], [2, 4], [3, 4], [4, 6], [5, 6], [6, 7]  
 [[1, 2], [1, 5], [2, 6], [3, 4], [4, 5], [4, 6], [6, 7]  
 [[1, 2], [1, 5], [2, 6], [3, 4], [4, 6], [4, 7], [5, 6]  
 [[1, 2], [1, 6], [2, 4], [3, 4], [4, 5], [5, 6], [6, 7]  
 [[1, 2], [1, 6], [2, 4], [3, 4], [4, 6], [5, 6], [5, 7]  
 [[1, 2], [1, 6], [2, 5], [3, 4], [4, 5], [4, 6], [6, 7]  
 [[1, 2], [1, 6], [2, 5], [3, 4], [4, 6], [4, 7], [5, 6]  
 [[1, 2], [1, 6], [2, 6], [3, 4], [4, 5], [4, 6], [5, 7]  
 [[1, 2], [1, 6], [2, 6], [3, 4], [4, 5], [4, 7], [5, 6]  
 [[1, 2], [1, 7], [2, 6], [3, 4], [4, 5], [4, 6], [5, 6]  
 [[1, 4], [1, 5], [2, 4], [2, 6], [3, 4], [5, 6], [6, 7]  
 [[1, 4], [1, 5], [2, 5], [2, 6], [3, 4], [4, 6], [6, 7]  
 [[1, 4], [1, 6], [2, 4], [2, 5], [3, 4], [5, 6], [6, 7]  
 [[1, 4], [1, 6], [2, 4], [2, 6], [3, 4], [5, 6], [5, 7]  
 [[1, 4], [1, 6], [2, 5], [2, 6], [3, 4], [4, 5], [6, 7]  
 [[1, 4], [1, 6], [2, 5], [2, 6], [3, 4], [4, 6], [5, 7]  
 [[1, 4], [1, 6], [2, 5], [2, 6], [3, 4], [4, 7], [5, 6]  
 [[1, 4], [1, 7], [2, 5], [2, 6], [3, 4], [4, 6], [5, 6]  
 [[1, 5], [1, 6], [2, 4], [2, 5], [3, 4], [4, 6], [6, 7]  
 [[1, 5], [1, 6], [2, 4], [2, 6], [3, 4], [4, 5], [6, 7]  
 [[1, 5], [1, 6], [2, 4], [2, 6], [3, 4], [4, 6], [5, 7]  
 [[1, 5], [1, 6], [2, 4], [2, 6], [3, 4], [4, 7], [5, 6]  
 [[1, 5], [1, 6], [2, 5], [2, 6], [3, 4], [4, 6], [4, 7]  
 [[1, 5], [1, 7], [2, 4], [2, 6], [3, 4], [4, 6], [5, 6]  
 [[1, 6], [1, 7], [2, 4], [2, 5], [3, 4], [4, 6], [5, 6]  
 [[1, 6], [1, 7], [2, 4], [2, 6], [3, 4], [4, 5], [5, 6]  
 [[1, 6], [1, 7], [2, 5], [2, 6], [3, 4], [4, 5], [4, 6]]

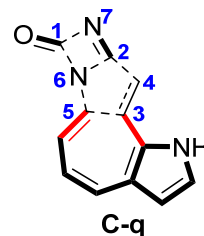

16



The chemical structure of C-x4 is a porphyrin-like macrocycle. It features a central nitrogen atom (N) coordinated by four nitrogen atoms (N) in a square planar arrangement. The central nitrogen is bonded to a carbonyl group (C=O) and a side chain (NH). The side chain is a five-membered ring containing a nitrogen atom (NH) and a carbonyl group (C=O). The side chain is attached to the macrocycle at the 3-position. The macrocycle is numbered 1 through 7, starting from the carbonyl carbon and proceeding clockwise. The side chain is attached to the macrocycle at the 3-position. The side chain is a five-membered ring containing a nitrogen atom (NH) and a carbonyl group (C=O). The side chain is attached to the macrocycle at the 3-position.

Chemical structure of a C-r (Cyclor) molecule, showing a bicyclic system with a carbonyl group and a nitrogen atom. The structure is labeled with numbers 1 through 7 and 'C-r'.

[[1, 2], [1, 3], [2, 4], [3, 4], [4, 6], [5, 6], [6, 7]  
 [[1, 2], [1, 3], [2, 6], [3, 4], [4, 5], [4, 6], [6, 7]  
 [[1, 2], [1, 3], [2, 6], [3, 4], [4, 6], [4, 7], [5, 6]  
 [[1, 2], [1, 4], [2, 3], [3, 4], [4, 6], [5, 6], [6, 7]

17





**C-x9**

[[1, 7], [2, 3], [3, 5], [3, 7], [4, 5], [4, 7], [5, 6],  
[[1, 7], [2, 4], [3, 4], [3, 5], [3, 7], [5, 6], [5, 7],  
[[1, 7], [2, 4], [3, 5], [3, 6], [3, 7], [4, 5], [5, 7],  
[[1, 7], [2, 5], [3, 4], [3, 5], [3, 6], [4, 7], [5, 7],  
[[1, 7], [2, 5], [3, 4], [3, 5], [3, 7], [4, 5], [6, 7],  
[[1, 7], [2, 5], [3, 4], [3, 5], [3, 7], [4, 6], [5, 7],  
[[1, 7], [2, 5], [3, 4], [3, 5], [3, 7], [4, 7], [5, 6],  
[[1, 7], [2, 5], [3, 5], [3, 6], [3, 7], [4, 5], [4, 7],  
[[1, 7], [2, 6], [3, 4], [3, 5], [3, 7], [4, 5], [5, 7],  
[[1, 7], [2, 7], [3, 4], [3, 5], [3, 6], [4, 5], [5, 7],  
[[1, 7], [2, 7], [3, 4], [3, 5], [3, 7], [4, 5], [5, 6]]

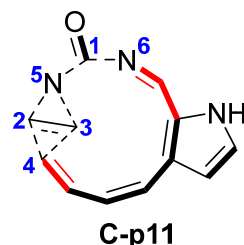

[1, 2], [1, 3], [2, 3], [2, 4], [3, 5], [4, 5], [5, 6]  
 [[1, 2], [1, 3], [2, 3], [2, 5], [3, 4], [4, 5], [5, 6]  
 [[1, 2], [1, 3], [2, 3], [2, 5], [3, 5], [4, 5], [4, 6]  
 [[1, 2], [1, 4], [2, 3], [2, 5], [3, 4], [3, 5], [5, 6]  
 [[1, 2], [1, 4], [2, 3], [2, 5], [3, 5], [3, 6], [4, 5]  
 [[1, 2], [1, 5], [2, 3], [2, 4], [3, 4], [3, 5], [5, 6]  
 [[1, 2], [1, 5], [2, 3], [2, 4], [3, 5], [3, 6], [4, 5]  
 [[1, 2], [1, 5], [2, 3], [2, 5], [3, 4], [3, 5], [4, 6]  
 [[1, 2], [1, 5], [2, 3], [2, 5], [3, 5], [3, 6], [4, 5]  
 [[1, 2], [1, 5], [2, 3], [2, 6], [3, 4], [3, 5], [4, 5]  
 [[1, 2], [1, 6], [2, 3], [2, 5], [3, 4], [3, 5], [4, 5]  
 [[1, 3], [1, 4], [2, 3], [2, 4], [2, 5], [3, 5], [5, 6]  
 [[1, 3], [1, 4], [2, 3], [2, 4], [2, 5], [3, 5], [4, 5]  
 [[1, 3], [1, 5], [2, 3], [2, 4], [2, 5], [3, 4], [5, 6]  
 [[1, 3], [1, 5], [2, 3], [2, 4], [2, 5], [3, 5], [4, 6]  
 [[1, 3], [1, 5], [2, 3], [2, 4], [2, 5], [3, 6], [4, 5]  
 [[1, 3], [1, 5], [2, 3], [2, 4], [2, 6], [3, 5], [4, 5]  
 [[1, 3], [1, 5], [2, 3], [2, 5], [2, 6], [3, 4], [4, 5]  
 [[1, 3], [1, 6], [2, 3], [2, 4], [2, 5], [3, 5], [4, 5]  
 [[1, 4], [1, 5], [2, 3], [2, 4], [2, 5], [3, 5], [3, 6]  
 [[1, 4], [1, 5], [2, 3], [2, 5], [2, 6], [3, 4], [3, 5]  
 [[1, 5], [1, 6], [2, 3], [2, 4], [2, 5], [3, 4], [3, 5]]

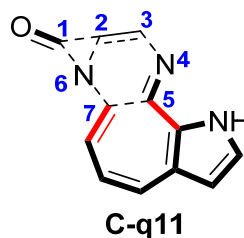[illegible]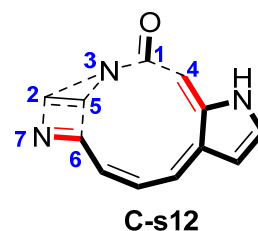

20

[[1, 2], [1, 5], [2, 3], [2, 5], [3, 6], [3, 7], [4, 5]  
 [[1, 2], [1, 5], [2, 4], [2, 5], [3, 5], [3, 6], [3, 7]  
 [[1, 2], [1, 5], [2, 5], [2, 6], [3, 4], [3, 5], [3, 7]  
 [[1, 2], [1, 5], [2, 5], [2, 7], [3, 4], [3, 5], [3, 6]  
 [[1, 2], [1, 6], [2, 3], [2, 5], [3, 4], [3, 5], [5, 7]  
 [[1, 2], [1, 6], [2, 3], [2, 5], [3, 5], [3, 7], [4, 5]  
 [[1, 2], [1, 7], [2, 3], [2, 5], [3, 4], [3, 5], [5, 6]  
 [[1, 2], [1, 7], [2, 3], [2, 5], [3, 5], [3, 6], [4, 5]  
 [[1, 3], [1, 4], [2, 3], [2, 5], [2, 6], [3, 5], [5, 7]  
 [[1, 3], [1, 4], [2, 3], [2, 5], [2, 7], [3, 5], [5, 6]  
 [[1, 3], [1, 5], [2, 3], [2, 4], [2, 5], [3, 6], [5, 7]

[[1, 3], [1, 5], [2, 3], [2, 4], [2, 5], [3, 7], [5, 6]  
 [[1, 3], [1, 5], [2, 3], [2, 5], [2, 6], [3, 4], [5, 7]  
 [[1, 3], [1, 5], [2, 3], [2, 5], [2, 6], [3, 5], [4, 7]  
 [[1, 3], [1, 5], [2, 3], [2, 5], [2, 6], [3, 7], [4, 5]  
 [[1, 3], [1, 5], [2, 3], [2, 5], [2, 7], [3, 4], [5, 6]  
 [[1, 3], [1, 5], [2, 3], [2, 5], [2, 7], [3, 5], [4, 6]  
 [[1, 3], [1, 5], [2, 3], [2, 5], [2, 7], [3, 6], [4, 5]  
 [[1, 3], [1, 5], [2, 4], [2, 5], [2, 6], [3, 5], [3, 7]  
 [[1, 3], [1, 5], [2, 4], [2, 5], [2, 7], [3, 5], [3, 6]  
 [[1, 3], [1, 5], [2, 5], [2, 6], [2, 7], [3, 4], [3, 5]  
 [[1, 3], [1, 6], [2, 3], [2, 4], [2, 5], [3, 5], [5, 7]

[[1, 3], [1, 6], [2, 3], [2, 5], [2, 7], [3, 5], [4, 5]  
 [[1, 3], [1, 7], [2, 3], [2, 4], [2, 5], [3, 5], [5, 6]  
 [[1, 3], [1, 7], [2, 3], [2, 5], [2, 6], [3, 5], [4, 5]  
 [[1, 4], [1, 5], [2, 3], [2, 5], [2, 6], [3, 5], [3, 7]  
 [[1, 4], [1, 5], [2, 3], [2, 5], [2, 7], [3, 5], [3, 6]  
 [[1, 5], [1, 6], [2, 3], [2, 4], [2, 5], [3, 5], [3, 7]  
 [[1, 5], [1, 6], [2, 3], [2, 5], [2, 7], [3, 4], [3, 5]  
 [[1, 5], [1, 7], [2, 3], [2, 4], [2, 5], [3, 5], [3, 6]  
 [[1, 5], [1, 7], [2, 3], [2, 5], [2, 6], [3, 4], [3, 5]]]

#### 4. The structures converted from the data groups

The 150 unique structures assembled by self-created program code in Python before the inflection pointing in the most important trend of the total energy of mechanic force field were shown below.

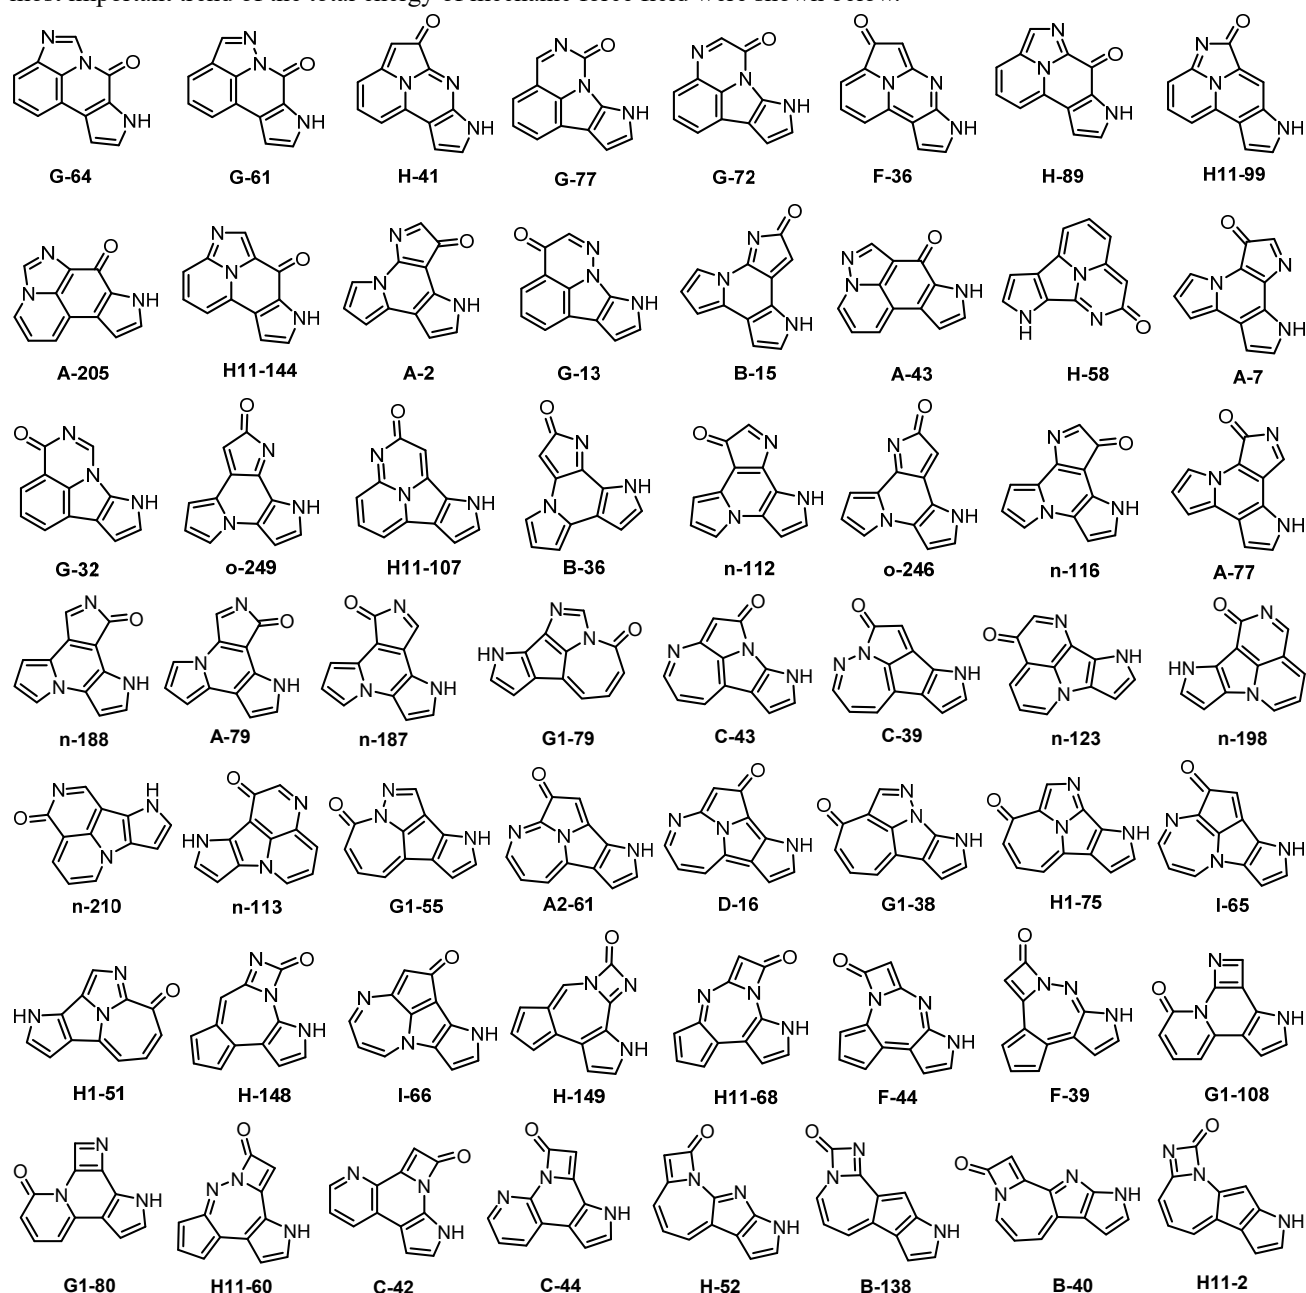

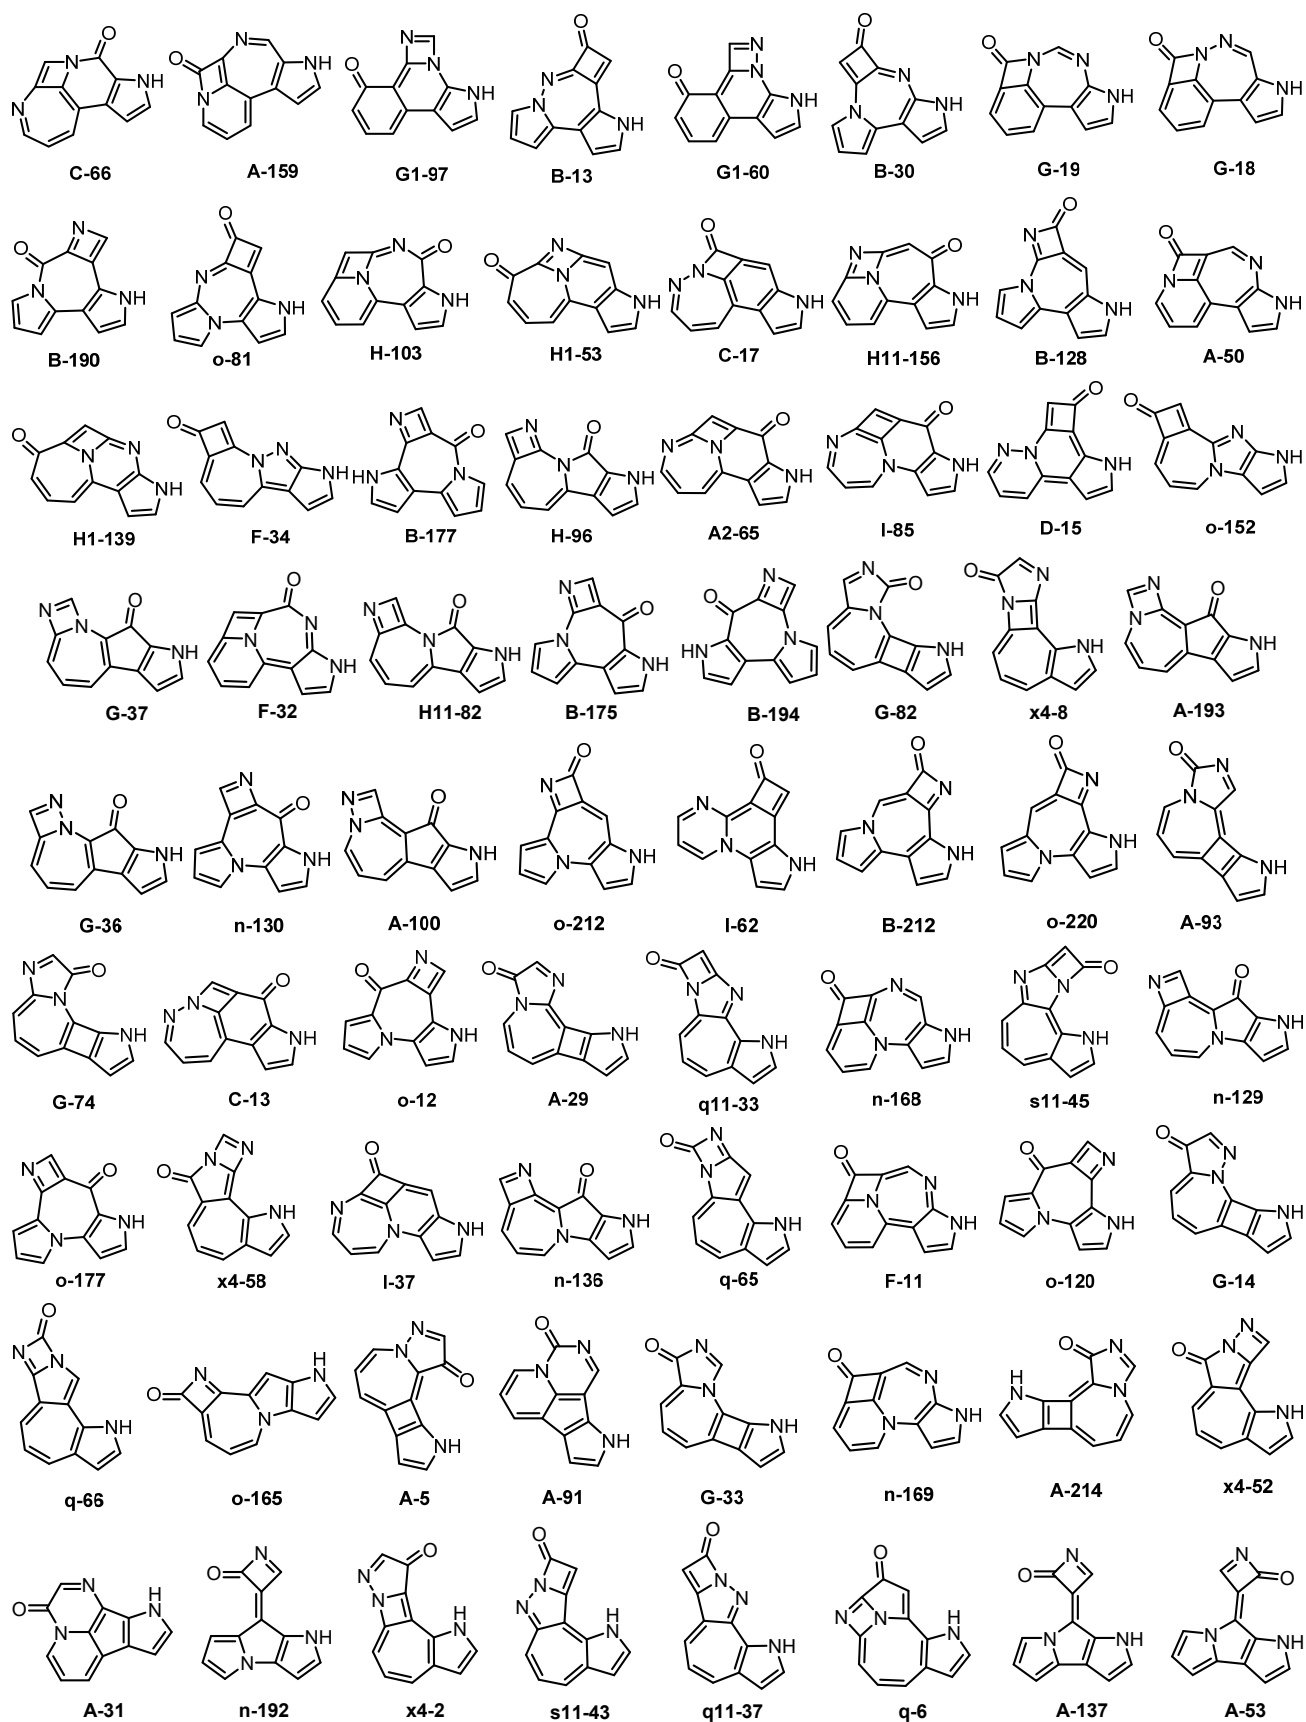

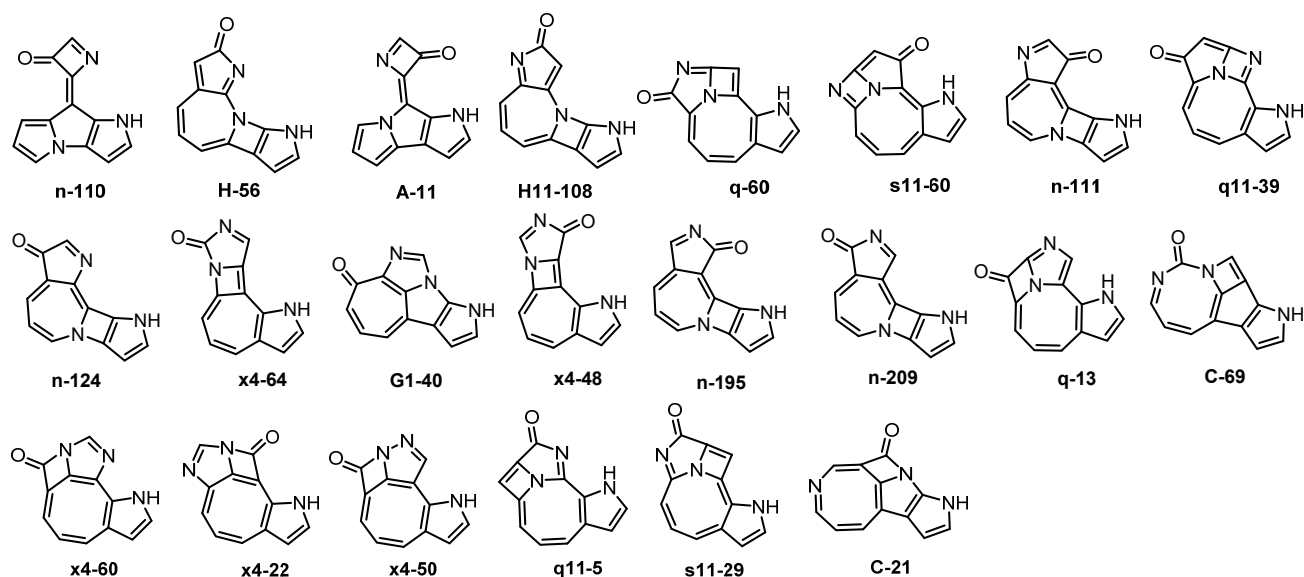

## 5. Calculated detail for DFT-GIAO

The quantum chemical calculations were carried out in the serial programs including Gaussian 16 software in Supercomputing Center in Pilot National Laboratory for Marine Science and Technology (Qingdao) [33]. The procedures were described in the previous paper [35]. In brief, the input geometries were built in the Chemdraw Pro 14.1 software with an MM2 force field. The lowest energy conformers within 10 kcal/mol were subjected to further DFT calculations at the B3LYP/6-31G\* level in the gas phase, and all minima displayed no imaginary frequencies by vibrational frequency analysis at the same level. Thermal corrections to Gibbs energies were obtained from frequency calculations at 298 K. The population of each conformer was calculated by Boltzmann distribution based on Gibbs free energy with the Shermo [34]. GIAO calculations of NMR shielding constants with spin-spin interactions were accomplished for all stable conformers using the DFT method at the mPW1PW91/6-31+G\*\* level in chloroform and DMSO. The shielding constants (including C and H) obtained were directly statistically analyzed with experimental chemical shifts.

**Table S1.** The calculated  $^{13}\text{C}$  NMR data as well as the calculated chemical shifts after linear scaling (mscaled.) of the 150 structures.

| NO  | EXP     | G-64    |          |          | G-61    |          |          | H-41    |          |          | G-77    |          |          | G-72    |          |          |
|-----|---------|---------|----------|----------|---------|----------|----------|---------|----------|----------|---------|----------|----------|---------|----------|----------|
|     |         | calcd.  | mscaled. | $\Delta$ |
| 1C  | 168.800 | 151.949 | 153.390  | -15.410  | 151.781 | 154.569  | -14.231  | 173.777 | 152.993  | -15.807  | 170.837 | 160.005  | -8.795   | 155.259 | 153.046  | -15.754  |
| 2C  | 133.700 | 142.145 | 142.797  | 9.097    | 144.890 | 146.866  | 13.166   | 152.215 | 141.119  | 7.419    | 152.364 | 145.803  | 12.103   | 151.076 | 149.156  | 15.456   |
| 3C  | 133.300 | 142.014 | 142.655  | 9.355    | 135.551 | 136.425  | 3.125    | 145.738 | 137.552  | 4.252    | 139.388 | 135.827  | 2.527    | 133.673 | 132.973  | -0.327   |
| 4C  | 132.400 | 130.789 | 130.527  | -1.873   | 128.905 | 128.996  | -3.404   | 142.288 | 135.652  | 3.252    | 134.948 | 132.414  | 0.014    | 131.262 | 130.731  | -1.669   |
| 5C  | 128.600 | 129.785 | 129.442  | 0.842    | 128.389 | 128.419  | -0.181   | 138.867 | 133.768  | 5.168    | 129.559 | 128.271  | -0.329   | 129.276 | 128.884  | 0.284    |
| 6C  | 125.200 | 129.603 | 129.245  | 4.045    | 125.858 | 125.590  | 0.390    | 135.714 | 132.032  | 6.832    | 125.207 | 124.925  | -0.275   | 125.903 | 125.747  | 0.547    |
| 7C  | 124.400 | 125.672 | 124.998  | 0.598    | 125.579 | 125.278  | 0.878    | 130.027 | 128.900  | 4.500    | 124.490 | 124.374  | -0.026   | 125.900 | 125.745  | 1.345    |
| 8C  | 122.500 | 123.792 | 122.966  | 0.466    | 124.900 | 124.519  | 2.019    | 112.243 | 119.106  | -3.394   | 122.377 | 122.749  | 0.249    | 124.943 | 124.855  | 2.355    |
| 9C  | 122.400 | 121.468 | 120.455  | -1.945   | 124.749 | 124.350  | 1.950    | 108.885 | 117.257  | -5.143   | 119.787 | 120.758  | -1.642   | 123.681 | 123.681  | 1.281    |
| 10C | 121.000 | 121.205 | 120.171  | -0.829   | 123.587 | 123.051  | 2.051    | 105.402 | 115.339  | -5.661   | 114.902 | 117.003  | -3.997   | 120.972 | 121.162  | 0.162    |
| 11C | 116.200 | 116.723 | 115.328  | -0.872   | 115.963 | 114.528  | -1.672   | 102.439 | 113.707  | -2.493   | 113.356 | 115.814  | -0.386   | 115.191 | 115.786  | -0.414   |
| 12C | 105.100 | 104.091 | 101.679  | -3.421   | 103.827 | 100.961  | -4.139   | 88.639  | 106.107  | 1.007    | 100.228 | 105.721  | 0.621    | 100.140 | 101.790  | -3.310   |
| R2  |         | 0.8244  |          |          | 0.8306  |          |          | 0.8014  |          |          | 0.9017  |          |          | 0.799   |          |          |
| MAE |         | 4.06    |          |          | 3.93    |          |          | 5.41    |          |          | 2.58    |          |          | 3.58    |          |          |
| TAD |         | 48.75   |          |          | 47.20   |          |          | 64.93   |          |          | 30.97   |          |          | 42.90   |          |          |

| F-36    |         |         | H-89    |         |         | H11-99  |         |         | A-205   |         |         | H11-144 |         |         | A-2     |         |         |
|---------|---------|---------|---------|---------|---------|---------|---------|---------|---------|---------|---------|---------|---------|---------|---------|---------|---------|
| 176.132 | 152.956 | -15.844 | 159.924 | 162.575 | -6.225  | 173.804 | 156.597 | -12.203 | 168.645 | 168.202 | -0.598  | 162.027 | 157.399 | -11.401 | 194.857 | 157.752 | -11.048 |
| 157.428 | 142.945 | 9.245   | 138.382 | 139.019 | 5.319   | 155.839 | 145.135 | 11.435  | 133.684 | 133.109 | -0.591  | 146.572 | 143.275 | 9.575   | 164.178 | 144.045 | 10.345  |
| 147.205 | 137.474 | 4.174   | 133.620 | 133.811 | 0.511   | 137.705 | 133.566 | 0.266   | 133.315 | 132.738 | -0.562  | 142.094 | 139.182 | 5.882   | 162.024 | 143.082 | 9.782   |
| 140.520 | 133.896 | 1.496   | 133.059 | 133.198 | 0.798   | 134.505 | 131.524 | -0.876  | 133.088 | 132.510 | 0.110   | 132.534 | 130.445 | -1.955  | 134.483 | 130.777 | -1.623  |
| 139.920 | 133.575 | 4.975   | 130.688 | 130.605 | 2.005   | 134.376 | 131.442 | 2.842   | 129.548 | 128.957 | 0.357   | 130.907 | 128.958 | 0.358   | 123.437 | 125.842 | -2.758  |
| 135.805 | 131.373 | 6.173   | 127.529 | 127.151 | 1.951   | 131.217 | 129.426 | 4.226   | 126.560 | 125.958 | 0.758   | 129.554 | 127.722 | 2.522   | 120.728 | 124.631 | -0.569  |
| 123.935 | 125.020 | 0.620   | 127.047 | 126.624 | 2.224   | 129.596 | 128.392 | 3.992   | 125.697 | 125.091 | 0.691   | 127.644 | 125.976 | 1.576   | 118.819 | 123.778 | -0.622  |
| 122.997 | 124.518 | 2.018   | 125.601 | 125.043 | 2.543   | 122.969 | 124.164 | 1.664   | 124.149 | 123.537 | 1.037   | 127.560 | 125.899 | 3.399   | 115.857 | 122.455 | -0.045  |
| 114.051 | 119.730 | -2.670  | 122.607 | 121.769 | -0.631  | 107.970 | 114.595 | -7.805  | 123.498 | 122.884 | 0.484   | 123.513 | 122.201 | -0.199  | 108.523 | 119.178 | -3.222  |
| 104.854 | 114.808 | -6.192  | 118.705 | 117.502 | -3.498  | 107.226 | 114.120 | -6.880  | 121.236 | 120.613 | -0.387  | 115.688 | 115.050 | -5.950  | 100.930 | 115.786 | -5.214  |
| 101.286 | 112.898 | -3.302  | 116.289 | 114.860 | -1.340  | 105.104 | 112.766 | -3.434  | 117.167 | 116.529 | 0.329   | 113.450 | 113.004 | -3.196  | 97.168  | 114.105 | -2.095  |
| 85.477  | 104.437 | -0.663  | 103.986 | 101.407 | -3.693  | 103.642 | 111.834 | 6.734   | 104.141 | 103.453 | -1.647  | 104.213 | 104.563 | -0.537  | 92.911  | 112.203 | 7.103   |
| 0.8109  |         |         | 0.9546  |         |         | 0.8068  |         |         | 0.9974  |         |         | 0.8714  |         |         | 0.8314  |         |         |
| 4.78    |         |         | 2.56    |         |         | 5.20    |         |         | 0.63    |         |         | 3.88    |         |         | 4.54    |         |         |
| 57.37   |         |         | 30.74   |         |         | 62.36   |         |         | 7.55    |         |         | 46.55   |         |         | 54.43   |         |         |
| G-13    |         |         | B-15    |         |         | A-43    |         |         | H-58    |         |         | A-7     |         |         | G-32    |         |         |
| 172.914 | 163.688 | -5.112  | 192.999 | 159.113 | -9.687  | 168.976 | 163.475 | -5.325  | 170.844 | 157.858 | -10.942 | 185.475 | 157.500 | -11.300 | 170.668 | 162.850 | -5.950  |
| 147.028 | 142.685 | 8.985   | 175.831 | 150.325 | 16.625  | 144.409 | 141.559 | 7.859   | 145.388 | 139.433 | 5.733   | 165.670 | 146.858 | 13.158  | 146.259 | 142.473 | 8.773   |
| 136.100 | 133.818 | 0.518   | 139.234 | 131.591 | -1.709  | 138.201 | 136.021 | 2.721   | 142.105 | 137.057 | 3.757   | 149.524 | 138.183 | 4.883   | 139.438 | 136.779 | 3.479   |
| 135.682 | 133.478 | 1.078   | 131.755 | 127.762 | -4.638  | 132.994 | 131.376 | -1.024  | 135.372 | 132.183 | -0.217  | 136.448 | 131.158 | -1.242  | 133.673 | 131.966 | -0.434  |
| 126.958 | 126.400 | -2.200  | 130.408 | 127.073 | -1.527  | 129.788 | 128.516 | -0.084  | 134.278 | 131.391 | 2.791   | 130.680 | 128.058 | -0.542  | 127.555 | 126.859 | -1.741  |
| 126.734 | 126.218 | 1.018   | 122.872 | 123.215 | -1.985  | 126.604 | 125.675 | 0.475   | 129.789 | 128.142 | 2.942   | 130.216 | 127.809 | 2.609   | 125.457 | 125.108 | -0.092  |
| 123.988 | 123.990 | -0.410  | 122.383 | 122.965 | -1.435  | 125.416 | 124.616 | 0.216   | 129.673 | 128.058 | 3.658   | 122.188 | 123.496 | -0.904  | 125.362 | 125.028 | 0.628   |
| 122.576 | 122.844 | 0.344   | 120.027 | 121.759 | -0.741  | 125.379 | 124.583 | 2.083   | 129.294 | 127.784 | 5.284   | 114.848 | 119.552 | -2.948  | 122.374 | 122.534 | 0.034   |
| 120.005 | 120.758 | -1.642  | 117.184 | 120.303 | -2.097  | 121.740 | 121.336 | -1.064  | 122.424 | 122.811 | 0.411   | 114.802 | 119.527 | -2.873  | 119.570 | 120.193 | -2.207  |
| 119.098 | 120.022 | -0.978  | 117.090 | 120.255 | -0.745  | 116.598 | 116.749 | -4.251  | 111.125 | 114.633 | -6.367  | 110.441 | 117.184 | -3.816  | 118.421 | 119.234 | -1.766  |
| 112.503 | 114.671 | -1.529  | 106.742 | 114.958 | -1.242  | 113.553 | 114.033 | -2.167  | 102.721 | 108.550 | -7.650  | 102.523 | 112.930 | -3.270  | 115.012 | 116.388 | 0.188   |
| 100.705 | 105.098 | -0.002  | 105.318 | 114.229 | 9.129   | 104.155 | 105.649 | 0.549   | 98.740  | 105.669 | 0.569   | 99.564  | 111.340 | 6.240   | 100.437 | 104.221 | -0.879  |
| 0.9526  |         |         | 0.8057  |         |         | 0.9498  |         |         | 0.8724  |         |         | 0.8365  |         |         | 0.9461  |         |         |
| 1.98    |         |         | 4.30    |         |         | 2.32    |         |         | 4.19    |         |         | 4.48    |         |         | 2.18    |         |         |
| 23.82   |         |         | 51.56   |         |         | 27.82   |         |         | 50.32   |         |         | 53.79   |         |         | 26.17   |         |         |
| o-249   |         |         | H11-107 |         |         | B-36    |         |         | n-112   |         |         | o-246   |         |         | n-116   |         |         |
| 195.181 | 160.621 | -8.179  | 171.050 | 157.821 | -10.979 | 193.001 | 160.248 | -8.552  | 194.005 | 157.935 | -10.865 | 195.795 | 159.012 | -9.788  | 194.683 | 159.259 | -9.541  |
| 169.914 | 147.211 | 13.511  | 149.320 | 141.865 | 8.165   | 166.260 | 145.778 | 12.078  | 166.710 | 145.257 | 11.557  | 176.515 | 149.487 | 15.787  | 165.152 | 145.190 | 11.490  |
| 145.653 | 134.336 | 1.036   | 139.064 | 134.334 | 1.034   | 151.807 | 137.958 | 4.658   | 153.691 | 139.209 | 5.909   | 142.526 | 132.697 | -0.603  | 156.734 | 141.180 | 7.880   |
| 138.946 | 130.777 | -1.623  | 139.053 | 134.326 | 1.926   | 138.119 | 130.551 | -1.849  | 135.786 | 130.893 | -1.507  | 134.845 | 128.902 | -3.498  | 127.873 | 127.431 | -4.969  |
| 136.234 | 129.337 | 0.737   | 137.044 | 132.850 | 4.250   | 133.094 | 127.832 | -0.768  | 134.175 | 130.144 | 1.544   | 128.967 | 125.999 | -2.601  | 124.052 | 125.610 | -2.990  |
| 126.838 | 124.351 | -0.849  | 130.826 | 128.285 | 3.085   | 127.849 | 124.994 | -0.206  | 127.488 | 127.038 | 1.838   | 127.825 | 125.435 | 0.235   | 122.129 | 124.694 | -0.506  |
| 124.818 | 123.279 | -1.121  | 129.130 | 127.039 | 2.639   | 127.422 | 124.763 | 0.363   | 116.677 | 122.016 | -2.384  | 126.722 | 124.890 | 0.490   | 120.962 | 124.138 | -0.262  |
| 122.157 | 121.867 | -0.633  | 127.439 | 125.797 | 3.297   | 119.058 | 120.237 | -2.263  | 115.604 | 121.518 | -0.982  | 124.762 | 123.921 | 1.421   | 117.541 | 122.509 | 0.009   |
| 114.668 | 117.892 | -4.508  | 119.318 | 119.834 | -2.566  | 115.878 | 118.517 | -3.883  | 110.898 | 119.332 | -3.068  | 115.360 | 119.277 | -3.123  | 115.816 | 121.687 | -0.713  |
| 113.343 | 117.189 | -3.811  | 108.951 | 112.222 | -8.778  | 113.986 | 117.493 | -3.507  | 101.350 | 114.897 | -6.103  | 113.699 | 118.456 | -2.544  | 105.422 | 116.735 | -4.265  |
| 112.391 | 116.684 | 0.484   | 108.891 | 112.178 | -4.022  | 107.273 | 113.860 | -2.340  | 97.143  | 112.943 | -3.257  | 106.152 | 114.728 | -1.472  | 98.524  | 113.449 | -2.751  |



|         |         |         |         |         |         |         |         |         |         |         |         |         |         |         |         |         |         |
|---------|---------|---------|---------|---------|---------|---------|---------|---------|---------|---------|---------|---------|---------|---------|---------|---------|---------|
| 99.954  | 110.084 | 4.984   | 101.807 | 106.976 | 1.876   | 102.702 | 111.387 | 6.287   | 95.978  | 112.402 | 7.302   | 98.198  | 110.799 | 5.699   | 94.989  | 111.765 | 6.665   |
| 0.8756  |         |         | 0.8658  |         |         | 0.873   |         |         | 0.8378  |         |         | 0.8356  |         |         | 0.8465  |         |         |
| 3.46    |         |         | 4.38    |         |         | 3.90    |         |         | 4.69    |         |         | 3.94    |         |         | 4.34    |         |         |
| 41.48   |         |         | 52.62   |         |         | 46.75   |         |         | 56.32   |         |         | 47.26   |         |         | 52.04   |         |         |
| A-77    |         |         | n-188   |         |         | A-79    |         |         | n-187   |         |         | G1-79   |         |         | C-43    |         |         |
| 186.081 | 154.511 | -14.289 | 191.813 | 154.808 | -13.992 | 190.887 | 155.802 | -12.998 | 191.868 | 155.724 | -13.076 | 162.597 | 156.139 | -12.661 | 166.208 | 146.345 | -22.455 |
| 182.430 | 152.806 | 19.106  | 186.645 | 152.591 | 18.891  | 181.706 | 151.629 | 17.929  | 183.837 | 152.176 | 18.476  | 144.566 | 139.158 | 5.458   | 162.732 | 144.497 | 10.797  |
| 132.855 | 129.650 | -3.650  | 129.709 | 128.165 | -5.135  | 135.585 | 130.667 | -2.633  | 130.449 | 128.589 | -4.711  | 143.827 | 138.462 | 5.162   | 162.605 | 144.429 | 11.129  |
| 130.941 | 128.756 | -3.644  | 128.928 | 127.830 | -4.570  | 132.778 | 129.392 | -3.008  | 128.816 | 127.868 | -4.532  | 138.523 | 133.466 | 1.066   | 141.578 | 133.247 | 0.847   |
| 124.781 | 125.878 | -2.722  | 127.730 | 127.316 | -1.284  | 129.955 | 128.109 | -0.491  | 128.519 | 127.737 | -0.863  | 138.124 | 133.091 | 4.491   | 133.798 | 129.110 | 0.510   |
| 123.972 | 125.500 | 0.300   | 126.929 | 126.973 | 1.773   | 124.014 | 125.408 | 0.208   | 126.105 | 126.670 | 1.470   | 137.049 | 132.078 | 6.878   | 131.100 | 127.675 | 2.475   |
| 120.750 | 123.995 | -0.405  | 117.346 | 122.861 | -1.539  | 122.618 | 124.774 | 0.374   | 116.706 | 122.518 | -1.882  | 132.181 | 127.494 | 3.094   | 124.299 | 124.058 | -0.342  |
| 117.398 | 122.430 | -0.070  | 116.556 | 122.523 | 0.023   | 116.496 | 121.991 | -0.509  | 115.545 | 122.005 | -0.495  | 125.224 | 120.941 | -1.559  | 122.831 | 123.278 | 0.778   |
| 116.824 | 122.161 | -0.239  | 115.366 | 122.012 | -0.388  | 110.630 | 119.325 | -3.075  | 113.772 | 121.221 | -1.179  | 123.289 | 119.119 | -3.281  | 120.735 | 122.163 | -0.237  |
| 112.003 | 119.910 | -1.090  | 109.782 | 119.616 | -1.384  | 107.963 | 118.113 | -2.887  | 112.651 | 120.726 | -0.274  | 120.130 | 116.144 | -4.856  | 117.937 | 120.675 | -0.325  |
| 101.739 | 115.115 | -1.085  | 99.616  | 115.255 | -0.945  | 101.727 | 115.279 | -0.921  | 99.351  | 114.850 | -1.350  | 119.295 | 115.358 | -0.842  | 100.078 | 111.177 | -5.023  |
| 96.948  | 112.877 | 7.777   | 95.731  | 113.589 | 8.489   | 96.952  | 113.109 | 8.009   | 96.171  | 113.445 | 8.345   | 105.216 | 102.098 | -3.002  | 92.148  | 106.960 | 1.860   |
| 0.7376  |         |         | 0.7314  |         |         | 0.7677  |         |         | 0.7501  |         |         | 0.8656  |         |         | 0.6923  |         |         |
| 4.53    |         |         | 4.87    |         |         | 4.42    |         |         | 4.72    |         |         | 4.36    |         |         | 4.73    |         |         |
| 54.38   |         |         | 58.41   |         |         | 53.04   |         |         | 56.65   |         |         | 52.35   |         |         | 56.78   |         |         |
| C-39    |         |         | n-123   |         |         | n-198   |         |         | n-210   |         |         | n-113   |         |         | G1-55   |         |         |
| 164.378 | 157.626 | -11.174 | 173.487 | 162.006 | -6.794  | 169.595 | 151.978 | -16.822 | 172.716 | 155.205 | -13.595 | 169.285 | 151.875 | -16.925 | 161.533 | 155.553 | -13.247 |
| 145.725 | 140.469 | 6.769   | 146.503 | 141.210 | 7.510   | 162.296 | 147.726 | 14.026  | 157.085 | 145.373 | 11.673  | 165.295 | 149.430 | 15.730  | 148.339 | 143.162 | 9.462   |
| 142.049 | 137.088 | 3.788   | 135.879 | 133.022 | -0.278  | 138.758 | 134.016 | 0.716   | 142.426 | 136.153 | 2.853   | 135.207 | 130.995 | -2.305  | 141.086 | 136.351 | 3.051   |
| 139.201 | 134.469 | 2.069   | 134.152 | 131.691 | -0.709  | 135.688 | 132.227 | -0.173  | 135.337 | 131.694 | -0.706  | 133.259 | 129.802 | -2.598  | 137.346 | 132.839 | 0.439   |
| 136.685 | 132.154 | 3.554   | 129.952 | 128.454 | -0.146  | 133.278 | 130.823 | 2.223   | 134.461 | 131.143 | 2.543   | 133.079 | 129.692 | 1.092   | 137.341 | 132.834 | 4.234   |
| 135.292 | 130.873 | 5.673   | 129.075 | 127.778 | 2.578   | 129.946 | 128.883 | 3.683   | 128.794 | 127.578 | 2.378   | 132.838 | 129.544 | 4.344   | 136.942 | 132.459 | 7.259   |
| 128.912 | 125.005 | 0.605   | 128.254 | 127.145 | 2.745   | 126.757 | 127.025 | 2.625   | 127.149 | 126.544 | 2.144   | 128.494 | 126.882 | 2.482   | 125.879 | 122.070 | -2.330  |
| 125.383 | 121.759 | -0.741  | 125.187 | 124.782 | 2.282   | 121.645 | 124.047 | 1.547   | 121.478 | 122.977 | 0.477   | 127.473 | 126.257 | 3.757   | 124.858 | 121.111 | -1.389  |
| 122.864 | 119.442 | -2.958  | 120.997 | 121.552 | -0.848  | 117.283 | 121.506 | -0.894  | 120.543 | 122.389 | -0.011  | 122.566 | 123.250 | 0.850   | 123.170 | 119.526 | -2.874  |
| 122.793 | 119.377 | -1.623  | 116.581 | 118.149 | -2.851  | 113.756 | 119.452 | -1.548  | 117.788 | 120.656 | -0.344  | 114.763 | 118.469 | -2.531  | 122.505 | 118.902 | -2.098  |
| 116.370 | 113.469 | -2.731  | 115.327 | 117.183 | 0.983   | 95.062  | 108.563 | -7.637  | 98.692  | 108.644 | -7.556  | 104.632 | 112.262 | -3.938  | 120.391 | 116.916 | 0.716   |
| 103.706 | 101.820 | -3.280  | 93.815  | 100.603 | -4.497  | 92.879  | 107.291 | 2.191   | 93.329  | 105.271 | 0.171   | 93.128  | 105.214 | 0.114   | 104.446 | 101.942 | -3.158  |
| 0.8958  |         |         | 0.9399  |         |         | 0.7738  |         |         | 0.841   |         |         | 0.7602  |         |         | 0.8521  |         |         |
| 3.75    |         |         | 2.68    |         |         | 4.51    |         |         | 3.70    |         |         | 4.72    |         |         | 4.19    |         |         |
| 44.97   |         |         | 32.22   |         |         | 54.08   |         |         | 44.45   |         |         | 56.66   |         |         | 50.26   |         |         |
| A2-61   |         |         | D-16    |         |         | G1-38   |         |         | H1-75   |         |         | I-65    |         |         | H1-51   |         |         |
| 178.722 | 158.157 | -10.643 | 177.659 | 158.302 | -10.498 | 179.579 | 162.537 | -6.263  | 176.566 | 163.604 | -5.196  | 198.437 | 151.701 | -17.099 | 173.248 | 162.427 | -6.373  |
| 150.688 | 140.325 | 6.625   | 154.654 | 142.996 | 9.296   | 146.392 | 137.119 | 3.419   | 143.658 | 136.125 | 2.425   | 178.804 | 144.264 | 10.564  | 147.317 | 140.542 | 6.842   |
| 139.446 | 133.174 | -0.126  | 152.895 | 141.826 | 8.526   | 145.092 | 136.123 | 2.823   | 138.87  | 132.127 | -1.173  | 149.739 | 133.254 | -0.046  | 138.683 | 133.254 | -0.046  |
| 138.503 | 132.574 | 0.174   | 134.718 | 129.733 | -2.667  | 142.614 | 134.225 | 1.825   | 138.145 | 131.522 | -0.878  | 147.716 | 132.488 | 0.088   | 137.409 | 132.179 | -0.221  |
| 135.602 | 130.728 | 2.128   | 133.571 | 128.970 | 0.370   | 138.211 | 130.853 | 2.253   | 137.203 | 130.736 | 2.136   | 147.324 | 132.339 | 3.739   | 135.167 | 130.287 | 1.687   |
| 134.948 | 130.312 | 5.112   | 129.390 | 126.188 | 0.988   | 136.987 | 129.915 | 4.715   | 135.49  | 129.305 | 4.105   | 143.44  | 130.868 | 5.668   | 131.006 | 126.775 | 1.575   |

|               |         |         |              |         |         |               |         |         |               |         |         |              |         |         |              |         |         |
|---------------|---------|---------|--------------|---------|---------|---------------|---------|---------|---------------|---------|---------|--------------|---------|---------|--------------|---------|---------|
| 132.048       | 128.468 | 4.068   | 125.633      | 123.689 | -0.711  | 132.144       | 126.206 | 1.806   | 133.957       | 128.025 | 3.625   | 140.43       | 129.728 | 5.328   | 128.763      | 124.882 | 0.482   |
| 129.638       | 126.935 | 4.435   | 124.036      | 122.626 | 0.126   | 126.234       | 121.680 | -0.820  | 129.894       | 124.632 | 2.132   | 132.482      | 126.717 | 4.217   | 128.252      | 124.451 | 1.951   |
| 126.269       | 124.792 | 2.392   | 122.774      | 121.787 | -0.613  | 126.100       | 121.577 | -0.823  | 128.795       | 123.715 | 1.315   | 121.968      | 122.734 | 0.334   | 126.78       | 123.208 | 0.808   |
| 108.679       | 113.603 | -7.397  | 119.185      | 119.399 | -1.601  | 118.499       | 115.755 | -5.245  | 125.776       | 121.194 | 0.194   | 98.832       | 113.971 | -7.029  | 125.524      | 122.148 | 1.148   |
| 101.600       | 109.100 | -7.100  | 108.010      | 111.964 | -4.236  | 115.609       | 113.542 | -2.658  | 112.115       | 109.787 | -6.413  | 91.163       | 111.066 | -5.134  | 111.712      | 110.491 | -5.709  |
| 95.910        | 105.480 | 0.380   | 99.141       | 106.064 | 0.964   | 103.200       | 104.038 | -1.062  | 103.695       | 102.756 | -2.344  | 73.91        | 104.530 | -0.570  | 102.859      | 103.019 | -2.081  |
| 0.8681        |         |         | 0.8819       |         |         | 0.9489        |         |         | 0.9518        |         |         | 0.7746       |         |         | 0.9466       |         |         |
| 4.22          |         |         | 3.38         |         |         | 2.81          |         |         | 2.66          |         |         | 4.98         |         |         | 2.41         |         |         |
| 50.58         |         |         | 40.60        |         |         | 33.71         |         |         | 31.94         |         |         | 59.82        |         |         | 28.92        |         |         |
| <b>H-148</b>  |         |         | <b>I-66</b>  |         |         | <b>H-149</b>  |         |         | <b>H11-68</b> |         |         | <b>F-44</b>  |         |         | <b>F-39</b>  |         |         |
| 144.514       | 143.243 | -25.557 | 191.375      | 157.889 | -10.911 | 171.627       | 157.226 | -11.574 | 200.656       | 152.969 | -15.831 | 166.725      | 143.154 | -25.646 | 177.821      | 155.195 | -13.605 |
| 143.163       | 142.032 | 8.332   | 161.03       | 142.307 | 8.607   | 160.462       | 148.742 | 15.042  | 161.008       | 138.815 | 5.115   | 163.413      | 141.707 | 8.007   | 166.802      | 148.718 | 15.018  |
| 139.695       | 138.924 | 5.624   | 160.749      | 142.163 | 8.863   | 142.841       | 135.352 | 2.052   | 153.804       | 136.243 | 2.943   | 162.067      | 141.120 | 7.820   | 141.655      | 133.937 | 0.637   |
| 133.966       | 133.789 | 1.389   | 138.943      | 130.965 | -1.435  | 140.737       | 133.753 | 1.353   | 148.57        | 134.374 | 1.974   | 161.446      | 140.848 | 8.448   | 137.134      | 131.279 | -1.121  |
| 133.642       | 133.498 | 4.898   | 135.636      | 129.267 | 0.667   | 129.989       | 125.586 | -3.014  | 145.956       | 133.441 | 4.841   | 142.83       | 132.719 | 4.119   | 133.285      | 129.017 | 0.417   |
| 131.722       | 131.777 | 6.577   | 134.619      | 128.745 | 3.545   | 127.538       | 123.723 | -1.477  | 137.295       | 130.349 | 5.149   | 136.187      | 129.818 | 4.618   | 130.279      | 127.250 | 2.050   |
| 127.672       | 128.147 | 3.747   | 124.129      | 123.358 | -1.042  | 126.829       | 123.184 | -1.216  | 127.733       | 126.936 | 2.536   | 123.611      | 124.326 | -0.074  | 127.157      | 125.415 | 1.015   |
| 124.834       | 125.604 | 3.104   | 122.776      | 122.663 | 0.163   | 126.149       | 122.668 | 0.168   | 126.133       | 126.364 | 3.864   | 113.818      | 120.049 | -2.451  | 123.855      | 123.474 | 0.974   |
| 124.775       | 125.551 | 3.151   | 113.957      | 118.135 | -4.265  | 124.948       | 121.755 | -0.645  | 109.769       | 120.523 | -1.877  | 113.06       | 119.718 | -2.682  | 123.24       | 123.112 | 0.712   |
| 111.907       | 114.017 | -6.983  | 110.88       | 116.555 | -4.445  | 121.207       | 118.912 | -2.088  | 104.233       | 118.546 | -2.454  | 105.163      | 116.270 | -4.730  | 112.659      | 116.893 | -4.107  |
| 108.25        | 110.739 | -5.461  | 106.202      | 114.153 | -2.047  | 114.447       | 113.775 | -2.425  | 103.087       | 118.137 | 1.937   | 100.854      | 114.388 | -1.812  | 106.893      | 113.504 | -2.696  |
| 103.288       | 106.292 | 1.192   | 93.019       | 107.383 | 2.283   | 108.041       | 108.907 | 3.807   | 43.563        | 96.887  | -8.213  | 89.771       | 109.548 | 4.448   | 93.701       | 105.749 | 0.649   |
| 0.631         |         |         | 0.868        |         |         | 0.8408        |         |         | 0.8262        |         |         | 0.6254       |         |         | 0.8253       |         |         |
| 6.33          |         |         | 4.02         |         |         | 3.74          |         |         | 4.73          |         |         | 6.24         |         |         | 3.58         |         |         |
| 76.01         |         |         | 48.27        |         |         | 44.86         |         |         | 56.74         |         |         | 74.86        |         |         | 43.00        |         |         |
| <b>G1-108</b> |         |         | <b>G1-80</b> |         |         | <b>H11-60</b> |         |         | <b>C-42</b>   |         |         | <b>C-44</b>  |         |         | <b>H-52</b>  |         |         |
| 206.824       | 161.711 | -7.089  | 204.157      | 164.830 | -3.970  | 176.501       | 152.857 | -15.943 | 200.139       | 153.170 | -15.630 | 166.520      | 144.959 | -23.841 | 197.561      | 150.657 | -18.143 |
| 162.555       | 141.547 | 7.847   | 156.589      | 140.029 | 6.329   | 169.800       | 149.079 | 15.379  | 152.808       | 136.599 | 2.899   | 166.417      | 144.911 | 11.211  | 167.221      | 139.953 | 6.253   |
| 158.051       | 139.495 | 6.195   | 143.534      | 133.222 | -0.078  | 141.972       | 133.393 | 0.093   | 148.195       | 134.984 | 1.684   | 151.688      | 138.022 | 4.722   | 166.159      | 139.578 | 6.278   |
| 141.516       | 131.964 | -0.436  | 136.933      | 129.780 | -2.620  | 138.226       | 131.281 | -1.119  | 142.283       | 132.914 | 0.514   | 146.039      | 135.380 | 2.980   | 156.245      | 136.080 | 3.680   |
| 137.424       | 130.100 | 1.500   | 134.866      | 128.702 | 0.102   | 137.242       | 130.726 | 2.126   | 136.937       | 131.043 | 2.443   | 135.796      | 130.590 | 1.990   | 134.035      | 128.245 | -0.355  |
| 125.918       | 124.859 | -0.341  | 131.69       | 127.046 | 1.846   | 130.654       | 127.013 | 1.813   | 133.094       | 129.697 | 4.497   | 134.992      | 130.214 | 5.014   | 133.780      | 128.155 | 2.955   |
| 121.639       | 122.910 | -1.490  | 130.525      | 126.439 | 2.039   | 128.426       | 125.757 | 1.357   | 127.952       | 127.897 | 3.497   | 133.374      | 129.457 | 5.057   | 127.067      | 125.786 | 1.386   |
| 120.758       | 122.508 | 0.008   | 130.333      | 126.339 | 3.839   | 128.308       | 125.690 | 3.190   | 125.363       | 126.991 | 4.491   | 117.524      | 122.044 | -0.456  | 126.105      | 125.447 | 2.947   |
| 110.937       | 118.035 | -4.365  | 120.696      | 121.314 | -1.086  | 118.700       | 120.274 | -2.126  | 122.993       | 126.161 | 3.761   | 114.025      | 120.407 | -1.993  | 124.627      | 124.925 | 2.525   |
| 103.273       | 114.544 | -6.456  | 105.721      | 113.506 | -7.494  | 116.649       | 119.118 | -1.882  | 111.271       | 122.057 | 1.057   | 113.570      | 120.195 | -0.805  | 115.922      | 121.854 | 0.854   |
| 102.226       | 114.067 | -2.133  | 104.069      | 112.645 | -3.555  | 107.772       | 114.114 | -2.086  | 99.782        | 118.035 | 1.835   | 104.461      | 115.934 | -0.266  | 99.450       | 116.043 | -0.157  |
| 97.303        | 111.825 | 6.725   | 98.425       | 109.702 | 4.602   | 90.319        | 104.276 | -0.824  | 31.254        | 94.043  | -11.057 | 73.660       | 101.529 | -3.571  | 45.167       | 96.892  | -8.208  |
| 0.8955        |         |         | 0.9306       |         |         | 0.7933        |         |         | 0.8207        |         |         | 0.6859       |         |         | 0.7971       |         |         |
| 3.72          |         |         | 3.13         |         |         | 3.99          |         |         | 4.45          |         |         | 5.16         |         |         | 4.48         |         |         |
| 44.59         |         |         | 37.56        |         |         | 47.94         |         |         | 53.36         |         |         | 61.91        |         |         | 53.74        |         |         |
| <b>B-138</b>  |         |         | <b>B-40</b>  |         |         | <b>H11-2</b>  |         |         | <b>C-66</b>   |         |         | <b>A-159</b> |         |         | <b>G1-97</b> |         |         |
| 177.278       | 155.213 | -13.587 | 172.792      | 147.477 | -21.323 | 177.980       | 150.321 | -18.479 | 158.864       | 151.879 | -16.921 | 219.588      | 168.554 | -0.246  | 183.736      | 150.494 | -18.306 |

|         |         |        |         |         |        |         |         |        |         |         |        |         |         |        |         |         |        |
|---------|---------|--------|---------|---------|--------|---------|---------|--------|---------|---------|--------|---------|---------|--------|---------|---------|--------|
| 161.106 | 145.351 | 11.651 | 162.822 | 142.543 | 8.843  | 161.432 | 142.148 | 8.448  | 151.974 | 146.067 | 12.367 | 155.129 | 137.059 | 3.359  | 176.963 | 147.403 | 13.703 |
| 143.483 | 134.605 | 1.305  | 160.310 | 141.299 | 7.999  | 159.432 | 141.160 | 7.860  | 142.418 | 138.007 | 4.707  | 147.225 | 133.197 | -0.103 | 165.730 | 142.275 | 8.975  |
| 141.692 | 133.513 | 1.113  | 143.971 | 133.213 | 0.813  | 143.326 | 133.206 | 0.806  | 138.734 | 134.899 | 2.499  | 146.726 | 132.953 | 0.553  | 145.059 | 132.838 | 0.438  |
| 137.648 | 131.047 | 2.447  | 139.278 | 130.891 | 2.291  | 142.791 | 132.941 | 4.341  | 136.913 | 133.363 | 4.763  | 133.618 | 126.549 | -2.051 | 139.790 | 130.433 | 1.833  |
| 136.254 | 130.197 | 4.997  | 136.850 | 129.689 | 4.489  | 139.692 | 131.411 | 6.211  | 127.239 | 125.203 | 0.003  | 129.531 | 124.552 | -0.648 | 127.285 | 124.725 | -0.475 |
| 129.948 | 126.351 | 1.951  | 133.964 | 128.261 | 3.861  | 126.908 | 125.097 | 0.697  | 125.787 | 123.978 | -0.422 | 128.453 | 124.025 | -0.375 | 119.099 | 120.988 | -3.412 |
| 125.283 | 123.507 | 1.007  | 128.234 | 125.425 | 2.925  | 122.175 | 122.759 | 0.259  | 125.457 | 123.700 | 1.200  | 124.105 | 121.901 | -0.599 | 116.922 | 119.994 | -2.506 |
| 118.319 | 119.260 | -3.140 | 125.173 | 123.910 | 1.510  | 119.868 | 121.620 | -0.780 | 122.403 | 121.124 | -1.276 | 123.378 | 121.545 | -0.855 | 112.341 | 117.903 | -4.497 |
| 115.245 | 117.385 | -3.615 | 107.594 | 115.210 | -5.790 | 109.212 | 116.357 | -4.643 | 117.328 | 116.843 | -4.157 | 120.908 | 120.339 | -0.661 | 111.720 | 117.619 | -3.381 |
| 101.502 | 109.005 | -7.195 | 96.756  | 109.847 | -6.353 | 102.813 | 113.196 | -3.004 | 112.498 | 112.769 | -3.431 | 108.065 | 114.064 | -2.136 | 107.705 | 115.786 | -0.414 |
| 100.087 | 108.142 | 3.042  | 88.522  | 105.772 | 0.672  | 82.925  | 103.374 | -1.726 | 104.113 | 105.696 | 0.596  | 97.572  | 108.937 | 3.837  | 102.012 | 113.187 | 8.087  |
| 0.8255  |         |        | 0.7153  |         |        | 0.7766  |         |        | 0.7941  |         |        | 0.9853  |         |        | 0.7156  |         |        |
| 4.59    |         |        | 5.57    |         |        | 4.77    |         |        | 4.36    |         |        | 1.29    |         |        | 5.50    |         |        |
| 55.05   |         |        | 66.87   |         |        | 57.25   |         |        | 52.34   |         |        | 15.42   |         |        | 66.03   |         |        |

| B-13    |         |         | G1-60   |         |         | B-30    |         |         | G-19    |         |         | G-18    |         |         | B-190   |         |        |
|---------|---------|---------|---------|---------|---------|---------|---------|---------|---------|---------|---------|---------|---------|---------|---------|---------|--------|
| 185.013 | 153.779 | -15.021 | 182.933 | 153.977 | -14.823 | 188.382 | 152.678 | -16.122 | 161.988 | 151.229 | -17.571 | 163.868 | 152.961 | -15.839 | 191.167 | 166.400 | -2.400 |
| 168.663 | 145.148 | 11.448  | 173.514 | 148.949 | 15.249  | 179.427 | 148.470 | 14.770  | 160.981 | 150.473 | 16.773  | 163.760 | 152.876 | 19.176  | 156.051 | 143.101 | 9.401  |
| 166.731 | 144.128 | 10.828  | 148.506 | 135.600 | 2.300   | 164.500 | 141.456 | 8.156   | 139.287 | 134.194 | 0.894   | 137.052 | 131.878 | -1.422  | 134.928 | 129.086 | -4.214 |
| 139.922 | 129.976 | -2.424  | 144.964 | 133.709 | 1.309   | 138.604 | 129.287 | -3.113  | 136.253 | 131.917 | -0.483  | 133.597 | 129.162 | -3.238  | 134.379 | 128.721 | -3.679 |
| 134.577 | 127.154 | -1.446  | 139.005 | 130.528 | 1.928   | 134.176 | 127.206 | -1.394  | 132.397 | 129.024 | 0.424   | 131.214 | 127.288 | -1.312  | 131.719 | 126.957 | -1.643 |
| 130.704 | 125.110 | -0.090  | 133.052 | 127.350 | 2.150   | 133.249 | 126.771 | 1.571   | 132.284 | 128.939 | 3.739   | 127.645 | 124.482 | -0.718  | 128.715 | 124.963 | -0.237 |
| 129.992 | 124.734 | 0.334   | 121.818 | 121.353 | -3.047  | 119.862 | 120.480 | -3.920  | 126.524 | 124.617 | 0.217   | 126.109 | 123.275 | -1.125  | 128.387 | 124.746 | 0.346  |
| 126.603 | 122.945 | 0.445   | 121.011 | 120.923 | -1.577  | 119.191 | 120.165 | -2.335  | 124.814 | 123.333 | 0.833   | 125.232 | 122.585 | 0.085   | 128.134 | 124.578 | 2.078  |
| 119.136 | 119.003 | -3.397  | 117.679 | 119.144 | -3.256  | 118.942 | 120.048 | -2.352  | 121.666 | 120.971 | -1.429  | 124.568 | 122.063 | -0.337  | 123.750 | 121.669 | -0.731 |
| 113.319 | 115.932 | -5.068  | 116.106 | 118.304 | -2.696  | 112.690 | 117.110 | -3.890  | 115.250 | 116.157 | -4.843  | 123.491 | 121.217 | 0.217   | 115.716 | 116.339 | -4.661 |
| 107.817 | 113.028 | -3.172  | 105.809 | 112.808 | -3.392  | 109.271 | 115.503 | -0.697  | 111.453 | 113.307 | -2.893  | 117.595 | 116.581 | 0.381   | 113.891 | 115.128 | -1.072 |
| 107.186 | 112.694 | 7.594   | 102.468 | 111.024 | 5.924   | 107.087 | 114.477 | 9.377   | 106.395 | 109.512 | 4.412   | 108.194 | 109.190 | 4.090   | 109.041 | 111.910 | 6.810  |
| 0.7688  |         |         | 0.7858  |         |         | 0.7289  |         |         | 0.7404  |         |         | 0.7434  |         |         | 0.9203  |         |        |
| 5.11    |         |         | 4.80    |         |         | 5.64    |         |         | 4.54    |         |         | 3.99    |         |         | 3.11    |         |        |
| 61.27   |         |         | 57.65   |         |         | 67.70   |         |         | 54.51   |         |         | 47.94   |         |         | 37.27   |         |        |

| o-81    |         |         | H-103   |         |         | H1-53   |         |         | C-17    |         |         | H11-156 |         |         | B-128   |         |         |
|---------|---------|---------|---------|---------|---------|---------|---------|---------|---------|---------|---------|---------|---------|---------|---------|---------|---------|
| 189.291 | 153.085 | -15.715 | 165.004 | 144.129 | -24.671 | 171.082 | 149.432 | -19.368 | 160.162 | 149.672 | -19.129 | 175.850 | 147.725 | -21.075 | 188.519 | 156.192 | -12.608 |
| 174.125 | 145.717 | 12.017  | 163.201 | 143.309 | 9.609   | 168.974 | 148.249 | 14.549  | 155.541 | 146.206 | 12.506  | 167.984 | 144.054 | 10.354  | 180.540 | 152.252 | 18.552  |
| 168.613 | 143.039 | 9.739   | 158.949 | 141.374 | 8.074   | 150.251 | 137.742 | 4.442   | 143.109 | 136.882 | 3.582   | 167.139 | 143.660 | 10.360  | 134.004 | 129.272 | -4.028  |
| 141.018 | 129.634 | -2.766  | 149.113 | 136.897 | 4.497   | 136.609 | 130.086 | -2.314  | 137.190 | 132.443 | 0.042   | 146.951 | 134.240 | 1.840   | 125.822 | 125.232 | -7.168  |
| 138.192 | 128.261 | -0.339  | 141.033 | 133.220 | 4.620   | 134.495 | 128.900 | 0.300   | 135.822 | 131.417 | 2.817   | 138.506 | 130.300 | 1.700   | 125.119 | 124.885 | -3.715  |
| 138.122 | 128.227 | 3.027   | 132.855 | 129.498 | 4.298   | 134.357 | 128.822 | 3.622   | 132.427 | 128.870 | 3.670   | 137.100 | 129.644 | 4.444   | 125.080 | 124.866 | -0.334  |
| 132.974 | 125.726 | 1.326   | 122.995 | 125.011 | 0.611   | 134.321 | 128.802 | 4.402   | 131.722 | 128.342 | 3.942   | 124.727 | 123.871 | -0.529  | 121.165 | 122.932 | -1.468  |
| 122.827 | 120.796 | -1.704  | 115.313 | 121.515 | -0.985  | 126.389 | 124.351 | 1.851   | 125.953 | 124.015 | 1.515   | 116.462 | 120.014 | -2.486  | 119.120 | 121.922 | -0.578  |
| 116.966 | 117.949 | -4.451  | 109.327 | 118.791 | -3.609  | 117.548 | 119.389 | -3.011  | 125.448 | 123.636 | 1.236   | 108.383 | 116.245 | -6.155  | 118.028 | 121.383 | -1.017  |
| 113.330 | 116.183 | -4.817  | 108.543 | 118.434 | -2.566  | 106.735 | 113.321 | -7.679  | 115.530 | 116.198 | -4.802  | 106.513 | 115.372 | -5.628  | 114.009 | 119.399 | -1.601  |
| 109.994 | 114.562 | -1.638  | 105.917 | 117.239 | 1.039   | 105.771 | 112.780 | -3.420  | 109.955 | 112.016 | -4.184  | 104.519 | 114.442 | -1.758  | 112.308 | 118.559 | 2.359   |
| 101.561 | 110.465 | 5.365   | 77.288  | 104.210 | -0.890  | 104.030 | 111.803 | 6.703   | 99.151  | 103.913 | -1.187  | 103.650 | 114.036 | 8.936   | 108.458 | 116.658 | 11.558  |

|        |        |        |        |        |        |
|--------|--------|--------|--------|--------|--------|
| 0.7707 | 0.6657 | 0.6958 | 0.7567 | 0.6678 | 0.7126 |
| 5.24   | 5.46   | 5.97   | 4.88   | 6.27   | 5.42   |
| 62.90  | 65.47  | 71.66  | 58.61  | 75.27  | 64.99  |

| A-50    |         |        | H1-139  |         |         | F-34    |         |         | B-177   |         |        | H-96    |         |         | A2-65   |         |         |
|---------|---------|--------|---------|---------|---------|---------|---------|---------|---------|---------|--------|---------|---------|---------|---------|---------|---------|
| 207.806 | 162.957 | -5.843 | 174.952 | 150.298 | -18.502 | 184.501 | 151.269 | -17.531 | 210.363 | 163.565 | -5.235 | 175.055 | 150.655 | -18.145 | 161.733 | 154.386 | -14.414 |
| 151.303 | 136.705 | 3.005  | 161.007 | 143.080 | 9.380   | 177.907 | 148.025 | 14.325  | 169.306 | 143.866 | 10.166 | 169.483 | 147.635 | 13.935  | 141.420 | 138.410 | 4.710   |
| 146.659 | 134.548 | 1.248  | 157.790 | 141.415 | 8.115   | 160.306 | 139.366 | 6.066   | 146.424 | 132.887 | -0.413 | 156.155 | 140.411 | 7.111   | 140.756 | 137.888 | 4.588   |
| 146.581 | 134.512 | 2.112  | 141.745 | 133.110 | 0.710   | 151.980 | 135.269 | 2.869   | 143.998 | 131.723 | -0.677 | 148.062 | 136.025 | 3.625   | 137.597 | 135.403 | 3.003   |
| 138.422 | 130.721 | 2.121  | 140.100 | 132.259 | 3.659   | 137.351 | 128.072 | -0.528  | 143.484 | 131.477 | 2.877  | 136.292 | 129.645 | 1.045   | 134.318 | 132.824 | 4.224   |
| 133.058 | 128.229 | 3.029  | 138.160 | 131.255 | 6.055   | 133.805 | 126.327 | 1.127   | 128.531 | 124.302 | -0.898 | 123.165 | 122.530 | -2.670  | 129.594 | 129.109 | 3.909   |
| 131.288 | 127.406 | 3.006  | 124.564 | 124.217 | -0.183  | 127.521 | 123.235 | -1.165  | 127.246 | 123.686 | -0.714 | 123.058 | 122.472 | -1.928  | 127.987 | 127.845 | 3.445   |
| 121.667 | 122.936 | 0.436  | 124.339 | 124.101 | 1.601   | 124.691 | 121.843 | -0.657  | 120.176 | 120.293 | -2.207 | 122.063 | 121.933 | -0.567  | 125.158 | 125.620 | 3.120   |
| 117.466 | 120.985 | -1.415 | 110.092 | 116.727 | -5.673  | 121.485 | 120.266 | -2.134  | 119.847 | 120.136 | -2.264 | 118.050 | 119.758 | -2.642  | 124.305 | 124.949 | 2.549   |
| 109.990 | 117.511 | -3.489 | 104.739 | 113.956 | -7.044  | 116.627 | 117.875 | -3.125  | 111.424 | 116.094 | -4.906 | 110.985 | 115.929 | -5.071  | 109.301 | 113.148 | -7.852  |
| 106.644 | 115.957 | -0.243 | 100.833 | 111.934 | -4.266  | 110.803 | 115.010 | -1.190  | 109.483 | 115.163 | -1.037 | 110.679 | 115.763 | -0.437  | 105.979 | 110.535 | -5.665  |
| 74.884  | 101.201 | -3.899 | 99.440  | 111.213 | 6.113   | 94.542  | 107.010 | 1.910   | 99.591  | 110.417 | 5.317  | 101.613 | 110.849 | 5.749   | 97.033  | 103.499 | -1.601  |
| 0.96    |         |        | 0.7296  |         |         | 0.7715  |         |         | 0.9195  |         |        | 0.738   |         |         | 0.8356  |         |         |
| 2.49    |         |        | 5.94    |         |         | 4.39    |         |         | 3.06    |         |        | 5.24    |         |         | 4.92    |         |         |
| 29.85   |         |        | 71.30   |         |         | 52.63   |         |         | 36.71   |         |        | 62.92   |         |         | 59.08   |         |         |

| I-85    |         |         | D-15    |         |         | o-152   |         |         | G-37    |         |         | F-32    |         |         | H11-82  |         |         |
|---------|---------|---------|---------|---------|---------|---------|---------|---------|---------|---------|---------|---------|---------|---------|---------|---------|---------|
| 162.866 | 152.623 | -16.177 | 178.591 | 150.862 | -17.938 | 186.683 | 152.615 | -16.185 | 179.954 | 157.844 | -10.956 | 159.992 | 145.283 | -23.517 | 176.903 | 156.753 | -12.047 |
| 148.964 | 141.947 | 8.247   | 173.862 | 148.471 | 14.771  | 175.632 | 147.178 | 13.478  | 155.131 | 141.939 | 8.239   | 154.595 | 142.079 | 8.379   | 161.314 | 146.807 | 13.107  |
| 145.131 | 139.004 | 5.704   | 151.743 | 137.290 | 3.990   | 158.798 | 138.896 | 5.596   | 153.839 | 141.112 | 7.812   | 151.894 | 140.475 | 7.175   | 147.390 | 137.924 | 4.624   |
| 144.957 | 138.870 | 6.470   | 137.796 | 130.240 | -2.160  | 146.077 | 132.637 | 0.237   | 146.683 | 136.527 | 4.127   | 149.071 | 138.798 | 6.398   | 134.980 | 130.006 | -2.394  |
| 130.357 | 127.659 | -0.941  | 135.136 | 128.895 | 0.295   | 139.585 | 129.443 | 0.843   | 132.493 | 127.435 | -1.165  | 140.860 | 133.923 | 5.323   | 132.019 | 128.117 | -0.483  |
| 129.748 | 127.191 | 1.991   | 134.604 | 128.626 | 3.426   | 131.447 | 125.439 | 0.239   | 128.046 | 124.586 | -0.614  | 136.646 | 131.420 | 6.220   | 131.273 | 127.641 | 2.441   |
| 129.113 | 126.704 | 2.304   | 128.224 | 125.401 | 1.001   | 130.569 | 125.007 | 0.607   | 127.503 | 124.238 | -0.162  | 121.650 | 122.516 | -1.884  | 126.628 | 124.678 | 0.278   |
| 124.021 | 122.794 | 0.294   | 126.911 | 124.738 | 2.238   | 128.924 | 124.198 | 1.698   | 121.740 | 120.546 | -1.954  | 119.365 | 121.159 | -1.341  | 123.893 | 122.933 | 0.433   |
| 123.110 | 122.094 | -0.306  | 125.013 | 123.778 | 1.378   | 125.892 | 122.706 | 0.306   | 120.613 | 119.824 | -2.576  | 113.678 | 117.782 | -4.618  | 121.146 | 121.180 | -1.220  |
| 121.980 | 121.226 | 0.226   | 112.153 | 117.277 | -3.723  | 113.982 | 116.846 | -4.154  | 120.407 | 119.692 | -1.308  | 108.969 | 114.986 | -6.014  | 113.925 | 116.573 | -4.427  |
| 108.482 | 110.861 | -5.339  | 99.662  | 110.963 | -5.237  | 107.582 | 113.697 | -2.503  | 105.392 | 110.072 | -6.128  | 106.323 | 113.415 | -2.785  | 104.643 | 110.651 | -5.549  |
| 97.693  | 102.576 | -2.524  | 91.875  | 107.027 | 1.927   | 89.677  | 104.888 | -0.212  | 104.933 | 109.778 | 4.678   | 103.588 | 111.791 | 6.691   | 104.131 | 110.325 | 5.225   |
| 0.823   |         |         | 0.7538  |         |         | 0.8021  |         |         | 0.8664  |         |         | 0.6464  |         |         | 0.8308  |         |         |
| 4.21    |         |         | 4.84    |         |         | 3.84    |         |         | 4.14    |         |         | 6.70    |         |         | 4.35    |         |         |
| 50.52   |         |         | 58.08   |         |         | 46.06   |         |         | 49.72   |         |         | 80.34   |         |         | 52.23   |         |         |

| B-175   |         |        | B-194   |         |        | G-82    |         |         | x4-8    |         |         | A-193   |         |         | G-36    |         |         |
|---------|---------|--------|---------|---------|--------|---------|---------|---------|---------|---------|---------|---------|---------|---------|---------|---------|---------|
| 218.663 | 163.765 | -5.035 | 192.778 | 162.464 | -6.336 | 164.944 | 146.120 | -22.680 | 157.556 | 152.655 | -16.145 | 174.911 | 150.440 | -18.360 | 172.398 | 154.472 | -14.328 |
| 172.055 | 143.733 | 10.033 | 169.037 | 148.379 | 14.679 | 159.559 | 142.968 | 9.268   | 148.766 | 143.837 | 10.137  | 167.284 | 146.183 | 12.483  | 157.165 | 144.450 | 10.750  |
| 158.902 | 138.080 | 4.780  | 137.167 | 129.470 | -3.830 | 152.547 | 138.864 | 5.564   | 145.175 | 140.235 | 6.935   | 154.552 | 139.077 | 5.777   | 144.703 | 136.251 | 2.951   |
| 137.122 | 128.719 | -3.681 | 133.138 | 127.080 | -5.320 | 150.979 | 137.946 | 5.546   | 139.001 | 134.041 | 1.641   | 150.757 | 136.959 | 4.559   | 142.052 | 134.507 | 2.107   |
| 132.024 | 126.528 | -2.072 | 131.114 | 125.879 | -2.721 | 150.439 | 137.630 | 9.030   | 136.183 | 131.214 | 2.614   | 136.484 | 128.994 | 0.394   | 136.277 | 130.708 | 2.108   |
| 122.844 | 122.582 | -2.618 | 130.075 | 125.262 | 0.062  | 133.292 | 127.594 | 2.394   | 133.104 | 128.125 | 2.925   | 134.136 | 127.683 | 2.483   | 134.070 | 129.256 | 4.056   |
| 121.130 | 121.846 | -2.554 | 126.654 | 123.233 | -1.167 | 127.460 | 124.180 | -0.220  | 128.161 | 123.166 | -1.234  | 126.307 | 123.314 | -1.086  | 131.271 | 127.414 | 3.014   |

|         |         |        |         |         |        |         |         |        |         |         |        |         |         |        |         |         |        |
|---------|---------|--------|---------|---------|--------|---------|---------|--------|---------|---------|--------|---------|---------|--------|---------|---------|--------|
| 117.577 | 120.319 | -2.181 | 125.064 | 122.289 | -0.211 | 120.414 | 120.056 | -2.444 | 127.416 | 122.419 | -0.081 | 124.424 | 122.263 | -0.237 | 127.610 | 125.006 | 2.506  |
| 115.286 | 119.334 | -3.066 | 123.133 | 121.144 | -1.256 | 117.503 | 118.353 | -4.047 | 127.038 | 122.040 | -0.360 | 121.659 | 120.720 | -1.680 | 116.343 | 117.593 | -4.807 |
| 113.364 | 118.508 | -2.492 | 118.499 | 118.394 | -2.606 | 114.408 | 116.541 | -4.459 | 125.882 | 120.880 | -0.120 | 118.709 | 119.073 | -1.927 | 110.275 | 113.601 | -7.399 |
| 107.450 | 115.966 | -0.234 | 115.422 | 116.569 | 0.369  | 107.119 | 112.275 | -3.925 | 112.890 | 107.846 | -8.354 | 101.478 | 109.457 | -6.743 | 107.021 | 111.460 | -4.740 |
| 103.506 | 114.271 | 9.171  | 110.229 | 113.488 | 8.388  | 105.117 | 111.103 | 6.003  | 112.248 | 107.202 | 2.102  | 101.424 | 109.427 | 4.327  | 103.084 | 108.870 | 3.770  |
| 0.8879  |         |        | 0.8479  |         |        | 0.668   |         |        | 0.801   |         |        | 0.7537  |         |        | 0.8091  |         |        |
| 3.99    |         |        | 3.91    |         |        | 6.30    |         |        | 4.39    |         |        | 5.00    |         |        | 5.21    |         |        |
| 47.92   |         |        | 46.94   |         |        | 75.58   |         |        | 52.65   |         |        | 60.06   |         |        | 62.54   |         |        |

| n-130   |         |        | A-100   |         |         | o-212   |         |         | l-62    |         |         | B-212   |         |         | o-220   |         |         |
|---------|---------|--------|---------|---------|---------|---------|---------|---------|---------|---------|---------|---------|---------|---------|---------|---------|---------|
| 193.605 | 164.473 | -4.327 | 173.733 | 154.310 | -14.490 | 191.614 | 157.019 | -11.781 | 184.498 | 152.173 | -16.627 | 185.100 | 155.048 | -13.752 | 188.197 | 154.796 | -14.004 |
| 161.646 | 145.150 | 11.450 | 155.091 | 142.554 | 8.854   | 181.500 | 152.031 | 18.331  | 170.436 | 145.565 | 11.865  | 180.028 | 152.401 | 18.701  | 181.811 | 151.665 | 17.965  |
| 138.437 | 131.118 | -2.182 | 138.863 | 132.321 | -0.979  | 134.453 | 128.827 | -4.473  | 158.958 | 140.171 | 6.871   | 135.828 | 129.328 | -3.972  | 140.889 | 131.601 | -1.699  |
| 137.103 | 130.311 | -2.089 | 136.595 | 130.891 | -1.509  | 133.079 | 128.150 | -4.250  | 141.608 | 132.019 | -0.381  | 134.847 | 128.816 | -3.584  | 134.646 | 128.540 | -3.860  |
| 131.040 | 126.646 | -1.954 | 135.779 | 130.376 | 1.776   | 129.697 | 126.482 | -2.118  | 134.870 | 128.852 | 0.252   | 130.064 | 126.319 | -2.281  | 133.660 | 128.056 | -0.544  |
| 128.818 | 125.302 | 0.102  | 135.136 | 129.971 | 4.771   | 126.427 | 124.869 | -0.331  | 131.666 | 127.347 | 2.147   | 128.982 | 125.755 | 0.555   | 131.997 | 127.241 | 2.041   |
| 126.106 | 123.663 | -0.737 | 134.786 | 129.750 | 5.350   | 122.921 | 123.140 | -1.260  | 130.020 | 126.573 | 2.173   | 127.161 | 124.804 | 0.404   | 126.651 | 124.620 | 0.220   |
| 123.250 | 121.936 | -0.564 | 133.644 | 129.030 | 6.530   | 121.083 | 122.233 | -0.267  | 129.096 | 126.139 | 3.639   | 118.844 | 120.463 | -2.037  | 121.173 | 121.934 | -0.566  |
| 123.189 | 121.899 | -0.501 | 126.236 | 124.358 | 1.958   | 120.616 | 122.003 | -0.397  | 114.279 | 119.177 | -3.223  | 118.083 | 120.065 | -2.335  | 113.512 | 118.178 | -4.222  |
| 116.357 | 117.768 | -3.232 | 118.317 | 119.365 | -1.635  | 115.320 | 119.391 | -1.609  | 102.177 | 113.490 | -7.510  | 115.157 | 118.538 | -2.462  | 111.926 | 117.400 | -3.600  |
| 115.530 | 117.268 | 1.068  | 101.381 | 108.685 | -7.515  | 109.629 | 116.584 | 0.384   | 97.209  | 111.156 | -5.044  | 111.472 | 116.614 | 0.414   | 110.350 | 116.628 | 0.428   |
| 100.433 | 108.141 | 3.041  | 90.856  | 102.048 | -3.052  | 102.205 | 112.923 | 7.823   | 96.790  | 110.959 | 5.859   | 109.245 | 115.452 | 10.352  | 102.719 | 112.886 | 7.786   |
| 0.9273  |         |        | 0.8184  |         |         | 0.7703  |         |         | 0.7583  |         |         | 0.7259  |         |         | 0.7507  |         |         |
| 2.60    |         |        | 4.87    |         |         | 4.42    |         |         | 5.47    |         |         | 5.07    |         |         | 4.74    |         |         |
| 31.25   |         |        | 58.42   |         |         | 53.02   |         |         | 65.59   |         |         | 60.85   |         |         | 56.93   |         |         |

| A-93    |         |         | G-74    |         |         | C-13    |         |        | o-12    |         |        | A-29    |         |         | q11-33  |         |         |
|---------|---------|---------|---------|---------|---------|---------|---------|--------|---------|---------|--------|---------|---------|---------|---------|---------|---------|
| 165.033 | 147.024 | -21.776 | 167.627 | 148.450 | -20.350 | 167.281 | 160.167 | -8.633 | 194.260 | 160.401 | -8.399 | 161.411 | 148.482 | -20.318 | 198.908 | 149.142 | -19.658 |
| 164.244 | 146.567 | 12.867  | 160.697 | 144.270 | 10.570  | 142.861 | 139.568 | 5.868  | 171.145 | 147.753 | 14.053 | 150.847 | 141.209 | 7.509   | 170.387 | 139.805 | 6.105   |
| 150.249 | 138.464 | 5.164   | 156.632 | 141.819 | 8.519   | 139.597 | 136.815 | 3.515  | 138.875 | 130.094 | -3.206 | 147.089 | 138.622 | 5.322   | 157.314 | 135.525 | 2.225   |
| 139.248 | 132.095 | -0.305  | 149.866 | 137.738 | 5.338   | 139.216 | 136.494 | 4.094  | 135.242 | 128.106 | -4.294 | 140.051 | 133.776 | 1.376   | 150.087 | 133.158 | 0.758   |
| 138.127 | 131.446 | 2.846   | 135.696 | 129.192 | 0.592   | 132.370 | 130.719 | 2.119  | 132.027 | 126.347 | -2.253 | 139.467 | 133.374 | 4.774   | 136.015 | 128.551 | -0.049  |
| 135.835 | 130.118 | 4.918   | 133.948 | 128.138 | 2.938   | 128.916 | 127.806 | 2.606  | 131.206 | 125.898 | 0.698  | 136.144 | 131.086 | 5.886   | 133.816 | 127.831 | 2.631   |
| 134.173 | 129.156 | 4.756   | 130.221 | 125.890 | 1.490   | 126.342 | 125.634 | 1.234  | 130.835 | 125.695 | 1.295  | 132.734 | 128.738 | 4.338   | 132.963 | 127.552 | 3.152   |
| 120.860 | 121.448 | -1.052  | 120.418 | 119.978 | -2.522  | 123.112 | 122.910 | 0.410  | 130.540 | 125.533 | 3.033  | 132.048 | 128.266 | 5.766   | 130.767 | 126.833 | 4.333   |
| 120.253 | 121.096 | -1.304  | 116.951 | 117.887 | -4.513  | 120.386 | 120.611 | -1.789 | 128.679 | 124.515 | 2.115  | 118.326 | 118.818 | -3.582  | 129.894 | 126.547 | 4.147   |
| 108.275 | 114.161 | -6.839  | 111.597 | 114.658 | -6.342  | 112.302 | 113.792 | -7.208 | 111.258 | 114.982 | -6.018 | 107.994 | 111.705 | -9.295  | 125.327 | 125.052 | 4.052   |
| 103.188 | 111.216 | -4.984  | 109.924 | 113.649 | -2.551  | 109.268 | 111.233 | -4.967 | 110.252 | 114.432 | -1.768 | 107.467 | 111.342 | -4.858  | 108.833 | 119.652 | 3.452   |
| 102.379 | 110.747 | 5.647   | 107.200 | 112.006 | 6.906   | 105.239 | 107.834 | 2.734  | 101.736 | 109.772 | 4.672  | 102.899 | 108.197 | 3.097   | 30.521  | 94.013  | -11.087 |
| 0.6741  |         |         | 0.701   |         |         | 0.9061  |         |        | 0.8508  |         |        | 0.7081  |         |         | 0.7506  |         |         |
| 6.04    |         |         | 6.05    |         |         | 3.76    |         |        | 4.32    |         |        | 6.34    |         |         | 5.14    |         |         |
| 72.46   |         |         | 72.63   |         |         | 45.18   |         |        | 51.80   |         |        | 76.12   |         |         | 61.65   |         |         |

| n-168   |         |         | s11-45  |         |         | n-129   |         |         | o-177   |         |        | x4-58   |         |         | l-37    |         |         |
|---------|---------|---------|---------|---------|---------|---------|---------|---------|---------|---------|--------|---------|---------|---------|---------|---------|---------|
| 187.389 | 155.612 | -13.188 | 199.374 | 149.351 | -19.449 | 168.610 | 145.945 | -22.855 | 209.896 | 163.354 | -5.446 | 159.418 | 154.155 | -14.645 | 189.826 | 157.266 | -11.534 |
| 173.124 | 147.641 | 13.941  | 170.264 | 139.786 | 6.086   | 167.696 | 145.494 | 11.794  | 169.973 | 144.179 | 10.479 | 152.559 | 147.392 | 13.692  | 168.586 | 145.357 | 11.657  |

|         |         |        |         |         |         |         |         |        |         |         |        |         |         |        |         |         |        |
|---------|---------|--------|---------|---------|---------|---------|---------|--------|---------|---------|--------|---------|---------|--------|---------|---------|--------|
| 156.976 | 138.617 | 5.317  | 157.347 | 135.541 | 2.241   | 157.182 | 140.308 | 7.008  | 158.057 | 138.456 | 5.156  | 140.162 | 135.169 | 1.869  | 154.670 | 137.554 | 4.254  |
| 147.585 | 133.369 | 0.969  | 150.601 | 133.324 | 0.924   | 154.622 | 139.045 | 6.645  | 138.563 | 129.093 | -3.307 | 137.548 | 132.591 | 0.191  | 146.497 | 132.972 | 0.572  |
| 137.273 | 127.607 | -0.993 | 135.870 | 128.484 | -0.116  | 135.484 | 129.604 | 1.004  | 127.303 | 123.685 | -4.915 | 135.051 | 130.129 | 1.529  | 140.552 | 129.639 | 1.039  |
| 135.051 | 126.365 | 1.165  | 133.995 | 127.868 | 2.668   | 129.291 | 126.549 | 1.349  | 126.246 | 123.177 | -2.023 | 134.857 | 129.938 | 4.738  | 137.280 | 127.804 | 2.604  |
| 129.383 | 123.198 | -1.202 | 132.360 | 127.330 | 2.930   | 124.046 | 123.962 | -0.438 | 124.455 | 122.317 | -2.083 | 129.630 | 124.784 | 0.384  | 127.635 | 122.396 | -2.004 |
| 124.786 | 120.629 | -1.871 | 130.536 | 126.731 | 4.231   | 121.326 | 122.620 | 0.120  | 124.020 | 122.108 | -0.392 | 128.059 | 123.235 | 0.735  | 127.543 | 122.344 | -0.156 |
| 122.264 | 119.220 | -3.180 | 130.384 | 126.681 | 4.281   | 121.303 | 122.609 | 0.209  | 121.414 | 120.856 | -1.544 | 125.577 | 120.788 | -1.612 | 123.086 | 119.845 | -2.555 |
| 119.016 | 117.405 | -3.595 | 124.915 | 124.884 | 3.884   | 109.109 | 116.593 | -4.407 | 117.702 | 119.073 | -1.927 | 120.447 | 115.730 | -5.270 | 121.643 | 119.036 | -1.964 |
| 116.313 | 115.895 | -0.305 | 108.973 | 119.646 | 3.446   | 99.788  | 111.995 | -4.205 | 112.169 | 116.416 | 0.216  | 115.843 | 111.190 | -5.010 | 115.861 | 115.794 | -0.406 |
| 102.293 | 108.060 | 2.960  | 31.011  | 94.027  | -11.073 | 93.564  | 108.925 | 3.825  | 100.529 | 110.825 | 5.725  | 113.036 | 108.423 | 3.323  | 94.212  | 103.656 | -1.444 |
| 0.8281  |         |        | 0.7548  |         |         | 0.6812  |         |        | 0.9021  |         |        | 0.8041  |         |        | 0.8772  |         |        |
| 4.06    |         |        | 5.11    |         |         | 5.32    |         |        | 3.60    |         |        | 4.42    |         |        | 3.35    |         |        |
| 48.69   |         |        | 61.33   |         |         | 63.86   |         |        | 43.21   |         |        | 53.00   |         |        | 40.19   |         |        |

| n-136   |         |         | q-65    |         |         | F-11    |         |         | o-120   |         |        | G-14    |         |         | q-66    |         |         |
|---------|---------|---------|---------|---------|---------|---------|---------|---------|---------|---------|--------|---------|---------|---------|---------|---------|---------|
| 183.123 | 152.880 | -15.920 | 152.438 | 145.735 | -23.065 | 162.786 | 145.698 | -23.102 | 212.523 | 161.943 | -6.857 | 167.634 | 146.018 | -22.782 | 144.873 | 149.026 | -19.774 |
| 166.710 | 144.465 | 10.765  | 152.277 | 145.605 | 11.905  | 158.076 | 142.770 | 9.070   | 169.663 | 142.356 | 8.656  | 162.633 | 143.366 | 9.666   | 140.496 | 143.480 | 9.780   |
| 155.510 | 138.723 | 5.423   | 135.575 | 132.140 | -1.160  | 151.290 | 138.550 | 5.250   | 157.220 | 136.670 | 3.370  | 160.871 | 142.432 | 9.132   | 138.970 | 141.547 | 8.247   |
| 153.198 | 137.538 | 5.138   | 135.551 | 132.120 | -0.280  | 145.197 | 134.761 | 2.361   | 148.876 | 132.856 | 0.456  | 148.422 | 135.831 | 3.431   | 133.402 | 134.492 | 2.092   |
| 133.148 | 127.258 | -1.342  | 134.787 | 131.504 | 2.904   | 144.248 | 134.171 | 5.571   | 141.571 | 129.518 | 0.918  | 148.378 | 135.808 | 7.208   | 130.534 | 130.859 | 2.259   |
| 131.804 | 126.569 | 1.369   | 132.779 | 129.885 | 4.685   | 143.002 | 133.397 | 8.197   | 141.182 | 129.340 | 4.140  | 131.118 | 126.657 | 1.457   | 129.645 | 129.732 | 4.532   |
| 126.995 | 124.103 | -0.297  | 132.327 | 129.521 | 5.121   | 135.488 | 128.724 | 4.324   | 124.027 | 121.500 | -2.900 | 124.170 | 122.973 | -1.427  | 126.425 | 125.652 | 1.252   |
| 126.476 | 123.837 | 1.337   | 129.703 | 127.406 | 4.906   | 124.120 | 121.656 | -0.844  | 117.821 | 118.664 | -3.836 | 118.701 | 120.073 | -2.427  | 125.442 | 124.407 | 1.907   |
| 123.565 | 122.345 | -0.055  | 128.412 | 126.365 | 3.965   | 115.619 | 116.370 | -6.030  | 114.307 | 117.058 | -5.342 | 114.650 | 117.925 | -4.475  | 123.139 | 121.489 | -0.911  |
| 120.264 | 120.652 | -0.348  | 121.777 | 121.016 | 0.016   | 114.361 | 115.588 | -5.412  | 112.683 | 116.316 | -4.684 | 114.541 | 117.868 | -3.132  | 117.496 | 114.339 | -6.661  |
| 96.665  | 108.553 | -7.647  | 109.090 | 110.787 | -5.413  | 108.903 | 112.194 | -4.006  | 109.811 | 115.004 | -1.196 | 104.386 | 112.483 | -3.717  | 116.397 | 112.947 | -3.253  |
| 93.083  | 106.717 | 1.617   | 97.588  | 101.514 | -3.586  | 104.897 | 109.703 | 4.603   | 103.982 | 112.340 | 7.240  | 103.794 | 112.170 | 7.070   | 110.604 | 105.607 | 0.507   |
| 0.8063  |         |         | 0.6796  |         |         | 0.6576  |         |         | 0.8902  |         |        | 0.6601  |         |         | 0.7456  |         |         |
| 4.27    |         |         | 5.58    |         |         | 6.56    |         |         | 4.13    |         |        | 6.33    |         |         | 5.10    |         |         |
| 51.26   |         |         | 67.01   |         |         | 78.77   |         |         | 49.59   |         |        | 75.92   |         |         | 61.18   |         |         |

| o-165   |         |         | A-5     |         |         | A-91    |         |         | G-33    |         |         | n-169   |         |         | A-214   |         |         |
|---------|---------|---------|---------|---------|---------|---------|---------|---------|---------|---------|---------|---------|---------|---------|---------|---------|---------|
| 190.411 | 154.047 | -14.753 | 177.703 | 157.223 | -11.577 | 151.882 | 145.689 | -23.111 | 172.090 | 149.280 | -19.520 | 187.680 | 155.425 | -13.375 | 177.683 | 154.101 | -14.699 |
| 181.215 | 149.818 | 16.118  | 153.327 | 141.556 | 7.856   | 151.384 | 145.306 | 11.606  | 164.306 | 145.312 | 11.612  | 172.411 | 147.129 | 13.429  | 161.092 | 144.505 | 10.805  |
| 142.401 | 131.967 | -1.333  | 140.892 | 133.564 | 0.264   | 147.199 | 142.092 | 8.792   | 151.725 | 138.898 | 5.598   | 154.877 | 137.603 | 4.303   | 148.960 | 137.487 | 4.187   |
| 141.675 | 131.633 | -0.767  | 138.602 | 132.093 | -0.307  | 136.349 | 133.758 | 1.358   | 146.497 | 136.233 | 3.833   | 152.396 | 136.255 | 3.855   | 138.920 | 131.680 | -0.720  |
| 134.717 | 128.433 | -0.167  | 137.639 | 131.474 | 2.874   | 131.274 | 129.860 | 1.260   | 143.768 | 134.842 | 6.242   | 137.549 | 128.188 | -0.412  | 138.095 | 131.203 | 2.603   |
| 132.852 | 127.576 | 2.376   | 137.490 | 131.378 | 6.178   | 130.291 | 129.105 | 3.905   | 129.215 | 127.423 | 2.223   | 132.904 | 125.665 | 0.465   | 137.211 | 130.692 | 5.492   |
| 131.369 | 126.894 | 2.494   | 135.315 | 129.980 | 5.580   | 125.453 | 125.388 | 0.988   | 119.002 | 122.216 | -2.184  | 127.235 | 122.585 | -1.815  | 134.095 | 128.890 | 4.490   |
| 127.977 | 125.334 | 2.834   | 128.268 | 125.451 | 2.951   | 121.247 | 122.158 | -0.342  | 116.592 | 120.988 | -1.512  | 123.561 | 120.589 | -1.911  | 121.527 | 121.620 | -0.880  |
| 115.677 | 119.677 | -2.723  | 119.796 | 120.006 | -2.394  | 120.623 | 121.679 | -0.721  | 114.867 | 120.108 | -2.292  | 121.076 | 119.239 | -3.161  | 113.509 | 116.983 | -5.417  |
| 106.061 | 115.254 | -5.746  | 109.087 | 113.123 | -7.877  | 120.380 | 121.492 | 0.492   | 103.250 | 114.186 | -6.814  | 117.729 | 117.420 | -3.580  | 106.999 | 113.217 | -7.783  |
| 104.967 | 114.751 | -1.449  | 103.706 | 109.665 | -6.535  | 105.571 | 110.117 | -6.083  | 101.425 | 113.255 | -2.945  | 113.269 | 114.997 | -1.203  | 105.832 | 112.542 | -3.658  |
| 90.912  | 108.287 | 3.187   | 101.204 | 108.057 | 2.957   | 101.514 | 107.001 | 1.901   | 96.693  | 110.843 | 5.743   | 101.407 | 108.552 | 3.452   | 102.499 | 110.614 | 5.514   |
| 0.7825  |         |         | 0.8419  |         |         | 0.6821  |         |         | 0.7219  |         |         | 0.8283  |         |         | 0.7864  |         |         |

|         |         |         |         |         |         |         |         |         |         |         |         |         |         |         |         |         |         |        |  |  |        |  |        |  |  |  |  |
|---------|---------|---------|---------|---------|---------|---------|---------|---------|---------|---------|---------|---------|---------|---------|---------|---------|---------|--------|--|--|--------|--|--------|--|--|--|--|
| 4.50    | 4.78    |         |         |         |         | 5.05    |         |         |         |         | 5.88    |         |         |         |         | 4.25    |         |        |  |  | 5.52   |  |        |  |  |  |  |
| 53.94   | 57.35   |         |         |         |         | 60.56   |         |         |         |         | 70.52   |         |         |         |         | 50.96   |         |        |  |  | 66.25  |  |        |  |  |  |  |
| x4-52   |         |         | A-31    |         |         |         |         | n-192   |         |         |         |         | x4-2    |         |         | s11-43  |         |        |  |  | q11-37 |  |        |  |  |  |  |
| 158.211 | 154.055 | -14.745 | 151.915 | 157.334 | -11.466 | 209.061 | 159.891 | -8.909  | 168.926 | 158.969 | -9.831  | 202.712 | 151.436 | -17.364 | 207.233 | 152.826 | -15.974 |        |  |  |        |  |        |  |  |  |  |
| 153.255 | 149.045 | 15.345  | 137.912 | 140.369 | 6.669   | 185.882 | 150.091 | 16.391  | 148.793 | 141.244 | 7.544   | 155.958 | 136.232 | 2.532   | 147.866 | 133.496 | -0.204  |        |  |  |        |  |        |  |  |  |  |
| 138.915 | 134.548 | 1.248   | 132.576 | 133.905 | 0.605   | 139.672 | 130.553 | -2.747  | 147.293 | 139.924 | 6.624   | 144.550 | 132.522 | -0.778  | 145.078 | 132.588 | -0.712  |        |  |  |        |  |        |  |  |  |  |
| 136.624 | 132.233 | -0.167  | 132.322 | 133.597 | 1.197   | 135.558 | 128.814 | -3.586  | 141.557 | 134.874 | 2.474   | 142.068 | 131.715 | -0.685  | 144.530 | 132.410 | 0.010   |        |  |  |        |  |        |  |  |  |  |
| 133.671 | 129.247 | 0.647   | 131.404 | 132.485 | 3.885   | 127.264 | 125.307 | -3.293  | 136.401 | 130.334 | 1.734   | 139.695 | 130.943 | 2.343   | 139.338 | 130.719 | 2.119   |        |  |  |        |  |        |  |  |  |  |
| 133.549 | 129.124 | 3.924   | 128.585 | 129.070 | 3.870   | 125.262 | 124.461 | -0.739  | 129.353 | 124.129 | -1.071  | 137.274 | 130.156 | 4.956   | 135.851 | 129.584 | 4.384   |        |  |  |        |  |        |  |  |  |  |
| 128.798 | 124.321 | -0.079  | 126.159 | 126.131 | 1.731   | 122.409 | 123.255 | -1.145  | 128.506 | 123.384 | -1.016  | 135.189 | 129.477 | 5.077   | 131.581 | 128.194 | 3.794   |        |  |  |        |  |        |  |  |  |  |
| 127.785 | 123.297 | 0.797   | 123.539 | 122.956 | 0.456   | 121.864 | 123.024 | 0.524   | 127.693 | 122.668 | 0.168   | 129.548 | 127.643 | 5.143   | 130.841 | 127.953 | 5.453   |        |  |  |        |  |        |  |  |  |  |
| 122.971 | 118.431 | -3.969  | 121.412 | 120.380 | -2.020  | 113.434 | 119.460 | -2.940  | 126.842 | 121.919 | -0.481  | 121.602 | 125.059 | 2.659   | 127.957 | 127.014 | 4.614   |        |  |  |        |  |        |  |  |  |  |
| 122.111 | 117.561 | -3.439  | 121.100 | 120.002 | -0.998  | 113.102 | 119.320 | -1.680  | 123.240 | 118.747 | -2.253  | 117.950 | 123.871 | 2.871   | 120.624 | 124.626 | 3.626   |        |  |  |        |  |        |  |  |  |  |
| 118.036 | 113.442 | -2.758  | 121.035 | 119.923 | 3.723   | 110.272 | 118.123 | 1.923   | 112.006 | 108.857 | -7.343  | 110.749 | 121.530 | 5.330   | 111.228 | 121.567 | 5.367   |        |  |  |        |  |        |  |  |  |  |
| 112.891 | 108.241 | 3.141   | 102.474 | 97.436  | -7.664  | 94.052  | 111.265 | 6.165   | 111.702 | 108.589 | 3.489   | 23.048  | 93.009  | -12.091 | 22.475  | 92.669  | -12.431 |        |  |  |        |  |        |  |  |  |  |
| 0.7968  |         |         | 0.8863  |         |         |         |         | 0.8289  |         |         |         |         | 0.8897  |         |         |         |         | 0.7711 |  |  |        |  | 0.7868 |  |  |  |  |
| 4.19    |         |         | 3.69    |         |         |         |         | 4.17    |         |         |         |         | 3.67    |         |         |         |         | 5.15   |  |  |        |  | 4.89   |  |  |  |  |
| 50.26   |         |         | 44.28   |         |         |         |         | 50.04   |         |         |         |         | 44.03   |         |         |         |         | 61.83  |  |  |        |  | 58.69  |  |  |  |  |
| q-6     |         |         | A-137   |         |         |         |         | A-53    |         |         |         |         | n-110   |         |         |         |         | H-56   |  |  |        |  | A-11   |  |  |  |  |
| 184.639 | 153.564 | -15.236 | 208.904 | 161.142 | -7.658  | 207.260 | 160.071 | -8.729  | 193.677 | 155.018 | -13.782 | 188.636 | 158.586 | -10.214 | 191.309 | 155.997 | -12.803 |        |  |  |        |  |        |  |  |  |  |
| 177.173 | 149.645 | 15.945  | 181.862 | 149.282 | 15.582  | 184.046 | 150.038 | 16.338  | 182.190 | 149.907 | 16.207  | 162.547 | 143.605 | 9.905   | 180.210 | 150.689 | 16.989  |        |  |  |        |  |        |  |  |  |  |
| 154.618 | 137.806 | 4.506   | 135.349 | 128.881 | -4.419  | 135.796 | 129.184 | -4.116  | 152.470 | 136.681 | 3.381   | 149.402 | 136.058 | 2.758   | 145.328 | 134.009 | 0.709   |        |  |  |        |  |        |  |  |  |  |
| 145.999 | 133.282 | 0.882   | 131.337 | 127.121 | -5.279  | 130.973 | 127.100 | -5.300  | 137.659 | 130.090 | -2.310  | 147.623 | 135.036 | 2.636   | 135.115 | 129.125 | -3.275  |        |  |  |        |  |        |  |  |  |  |
| 130.937 | 125.376 | -3.224  | 130.433 | 126.725 | -1.875  | 130.340 | 126.826 | -1.774  | 135.871 | 129.295 | 0.695   | 144.802 | 133.416 | 4.816   | 129.893 | 126.628 | -1.972  |        |  |  |        |  |        |  |  |  |  |
| 130.201 | 124.990 | -0.210  | 128.953 | 126.076 | 0.876   | 128.969 | 126.233 | 1.033   | 124.296 | 124.144 | -1.056  | 130.736 | 125.340 | 0.140   | 128.234 | 125.834 | 0.634   |        |  |  |        |  |        |  |  |  |  |
| 128.317 | 124.001 | -0.399  | 121.499 | 122.806 | -1.594  | 119.815 | 122.277 | -2.123  | 123.884 | 123.960 | -0.440  | 128.767 | 124.209 | -0.191  | 126.604 | 125.055 | 0.655   |        |  |  |        |  |        |  |  |  |  |
| 120.580 | 119.939 | -2.561  | 119.835 | 122.077 | -0.423  | 118.301 | 121.623 | -0.877  | 118.231 | 121.445 | -1.055  | 120.457 | 119.437 | -3.063  | 118.771 | 121.309 | -1.191  |        |  |  |        |  |        |  |  |  |  |
| 118.795 | 119.002 | -3.398  | 116.014 | 120.401 | -1.999  | 114.921 | 120.162 | -2.238  | 109.844 | 117.713 | -4.687  | 120.423 | 119.418 | -2.982  | 118.182 | 121.028 | -1.372  |        |  |  |        |  |        |  |  |  |  |
| 116.247 | 117.665 | -3.335  | 113.122 | 119.132 | -1.868  | 113.186 | 119.412 | -1.588  | 109.365 | 117.499 | -3.501  | 118.840 | 118.509 | -2.491  | 111.848 | 117.999 | -3.001  |        |  |  |        |  |        |  |  |  |  |
| 110.265 | 114.525 | -1.675  | 106.056 | 116.033 | -0.167  | 106.423 | 116.489 | 0.289   | 109.188 | 117.421 | 1.221   | 105.651 | 110.936 | -5.264  | 102.319 | 113.442 | -2.758  |        |  |  |        |  |        |  |  |  |  |
| 108.853 | 113.784 | 8.684   | 101.136 | 113.875 | 8.775   | 101.198 | 114.231 | 9.131   | 93.367  | 110.380 | 5.280   | 102.347 | 109.039 | 3.939   | 100.343 | 112.497 | 7.397   |        |  |  |        |  |        |  |  |  |  |
| 0.7537  |         |         | 0.8266  |         |         |         |         | 0.8076  |         |         |         |         | 0.789   |         |         |         |         | 0.8787 |  |  |        |  | 0.7861 |  |  |  |  |
| 5.00    |         |         | 4.21    |         |         |         |         | 4.46    |         |         |         |         | 4.47    |         |         |         |         | 4.03   |  |  |        |  | 4.40   |  |  |  |  |
| 60.05   |         |         | 50.51   |         |         |         |         | 53.54   |         |         |         |         | 53.61   |         |         |         |         | 48.40  |  |  |        |  | 52.76  |  |  |  |  |
| H11-108 |         |         | q-60    |         |         |         |         | s11-60  |         |         |         |         | n-111   |         |         |         |         | q11-39 |  |  |        |  | n-124  |  |  |  |  |
| 189.822 | 151.178 | -17.622 | 184.949 | 153.048 | -15.752 | 183.414 | 149.779 | -19.021 | 185.585 | 155.027 | -13.773 | 187.805 | 153.547 | -15.253 | 184.752 | 153.909 | -14.891 |        |  |  |        |  |        |  |  |  |  |
| 175.492 | 145.134 | 11.434  | 181.476 | 151.300 | 17.600  | 174.475 | 145.928 | 12.228  | 157.232 | 140.278 | 6.578   | 174.549 | 147.193 | 13.493  | 169.242 | 146.044 | 12.344  |        |  |  |        |  |        |  |  |  |  |
| 158.000 | 137.755 | 4.455   | 150.647 | 135.781 | 2.481   | 158.568 | 139.075 | 5.775   | 151.854 | 137.480 | 4.180   | 162.364 | 141.353 | 8.053   | 148.158 | 135.352 | 2.052   |        |  |  |        |  |        |  |  |  |  |
| 149.272 | 134.074 | 1.674   | 134.697 | 127.751 | -4.649  | 148.021 | 134.531 | 2.131   | 144.435 | 133.621 | 1.221   | 140.032 | 130.649 | -1.751  | 141.372 | 131.911 | -0.489  |        |  |  |        |  |        |  |  |  |  |
| 148.407 | 133.709 | 5.109   | 134.076 | 127.439 | -1.161  | 142.557 | 132.178 | 3.578   | 140.130 | 131.382 | 2.782   | 134.640 | 128.065 | -0.535  | 134.553 | 128.453 | -0.147  |        |  |  |        |  |        |  |  |  |  |
| 143.970 | 131.838 | 6.638   | 133.187 | 126.991 | 1.791   | 132.986 | 128.054 | 2.854   | 136.192 | 129.333 | 4.133   | 129.030 | 125.376 | 0.176   | 133.846 | 128.094 | 2.894   |        |  |  |        |  |        |  |  |  |  |
| 121.682 | 122.436 | -1.964  | 126.966 | 123.860 | -0.540  | 125.368 | 124.773 | 0.373   | 134.723 | 128.569 | 4.169   | 125.716 | 123.788 | -0.612  | 132.275 | 127.298 | 2.898   |        |  |  |        |  |        |  |  |  |  |
| 118.134 | 120.940 | -1.560  | 124.658 | 122.698 | 0.198   | 117.838 | 121.529 | -0.971  | 132.337 | 127.328 | 4.828   | 123.625 | 122.785 | 0.285   | 130.906 | 126.603 | 4.103   |        |  |  |        |  |        |  |  |  |  |

|         |         |        |         |         |        |         |         |        |         |         |        |         |         |        |         |         |        |
|---------|---------|--------|---------|---------|--------|---------|---------|--------|---------|---------|--------|---------|---------|--------|---------|---------|--------|
| 116.567 | 120.279 | -2.121 | 117.315 | 119.001 | -3.399 | 116.536 | 120.968 | -1.432 | 121.250 | 121.560 | -0.840 | 119.849 | 120.976 | -1.424 | 122.965 | 122.577 | 0.177  |
| 104.776 | 115.306 | -5.694 | 115.051 | 117.862 | -3.138 | 112.933 | 119.416 | -1.584 | 110.303 | 115.866 | -5.134 | 114.232 | 118.283 | -2.717 | 116.119 | 119.105 | -1.895 |
| 103.500 | 114.767 | -1.433 | 108.399 | 114.513 | -1.687 | 88.438  | 108.863 | -7.337 | 94.870  | 107.837 | -8.363 | 99.306  | 111.129 | -5.071 | 93.579  | 107.675 | -8.525 |
| 83.319  | 106.255 | 1.155  | 106.165 | 113.388 | 8.288  | 87.696  | 108.543 | 3.443  | 90.061  | 105.336 | 0.236  | 98.011  | 110.509 | 5.409  | 91.420  | 106.580 | 1.480  |
| 0.7713  |         |        | 0.7309  |         |        | 0.7474  |         |        | 0.8368  |         |        | 0.7843  |         |        | 0.8068  |         |        |
| 5.07    |         |        | 5.06    |         |        | 5.06    |         |        | 4.69    |         |        | 4.56    |         |        | 4.32    |         |        |
| 60.86   |         |        | 60.68   |         |        | 60.73   |         |        | 56.24   |         |        | 54.78   |         |        | 51.90   |         |        |

| x4-64   |         |         | G1-40   |         |        | x4-48   |         |        | n-195   |         |         | n-209   |         |         | q-13    |         |         |
|---------|---------|---------|---------|---------|--------|---------|---------|--------|---------|---------|---------|---------|---------|---------|---------|---------|---------|
| 159.589 | 152.668 | -16.132 | 178.123 | 162.748 | -6.052 | 171.651 | 163.092 | -5.708 | 185.628 | 151.238 | -17.562 | 186.162 | 153.283 | -15.517 | 167.408 | 152.683 | -16.117 |
| 151.912 | 145.477 | 11.777  | 143.847 | 135.313 | 1.613  | 146.422 | 140.618 | 6.918  | 178.699 | 148.129 | 14.429  | 171.881 | 146.636 | 12.936  | 164.551 | 150.751 | 17.051  |
| 147.868 | 141.689 | 8.389   | 143.309 | 134.883 | 1.583  | 142.386 | 137.022 | 3.722  | 152.352 | 136.310 | 3.010   | 151.681 | 137.233 | 3.933   | 142.343 | 135.734 | 2.434   |
| 140.868 | 135.132 | 2.732   | 141.680 | 133.579 | 1.179  | 137.743 | 132.886 | 0.486  | 140.006 | 130.772 | -1.628  | 138.788 | 131.231 | -1.169  | 139.857 | 134.053 | 1.653   |
| 134.390 | 129.065 | 0.465   | 136.488 | 129.423 | 0.823  | 132.680 | 128.376 | -0.224 | 137.688 | 129.732 | 1.132   | 135.001 | 129.468 | 0.868   | 130.269 | 127.570 | -1.030  |
| 129.097 | 124.107 | -1.093  | 136.411 | 129.361 | 4.161  | 129.386 | 125.442 | 0.242  | 135.963 | 128.958 | 3.758   | 134.106 | 129.051 | 3.851   | 126.126 | 124.768 | -0.432  |
| 128.499 | 123.546 | -0.854  | 135.918 | 128.967 | 4.567  | 128.205 | 124.390 | -0.010 | 134.556 | 128.327 | 3.927   | 133.027 | 128.549 | 4.149   | 123.068 | 122.701 | -1.699  |
| 128.474 | 123.523 | 1.023   | 133.253 | 126.834 | 4.334  | 127.297 | 123.581 | 1.081  | 121.930 | 122.663 | 0.163   | 119.982 | 122.477 | -0.023  | 120.166 | 120.738 | -1.762  |
| 123.923 | 119.260 | -3.140  | 123.943 | 119.382 | -3.018 | 125.908 | 122.344 | -0.056 | 120.614 | 122.072 | -0.328  | 115.795 | 120.528 | -1.872  | 119.192 | 120.080 | -2.320  |
| 123.721 | 119.071 | -1.929  | 119.349 | 115.705 | -5.295 | 115.524 | 113.094 | -7.906 | 108.470 | 116.625 | -4.375  | 108.783 | 117.263 | -3.737  | 117.316 | 118.811 | -2.189  |
| 115.898 | 111.743 | -4.457  | 118.341 | 114.898 | -1.302 | 114.998 | 112.625 | -3.575 | 93.813  | 110.050 | -6.150  | 93.039  | 109.935 | -6.265  | 111.154 | 114.644 | -1.556  |
| 112.241 | 108.318 | 3.218   | 102.836 | 102.488 | -2.612 | 112.255 | 110.182 | 5.082  | 90.991  | 108.784 | 3.684   | 88.685  | 107.908 | 2.808   | 105.961 | 111.133 | 6.033   |
| 0.7938  |         |         | 0.9423  |         |        | 0.9225  |         |        | 0.752   |         |         | 0.7943  |         |         | 0.7577  |         |         |
| 4.60    |         |         | 3.04    |         |        | 2.92    |         |        | 5.01    |         |         | 4.76    |         |         | 4.52    |         |         |
| 55.21   |         |         | 36.54   |         |        | 35.01   |         |        | 60.15   |         |         | 57.13   |         |         | 54.28   |         |         |

| C-69    |         |         | x4-60   |         |         | x4-22   |         |         | x4-50   |         |         | q11-5   |         |         | s11-29  |         |         |
|---------|---------|---------|---------|---------|---------|---------|---------|---------|---------|---------|---------|---------|---------|---------|---------|---------|---------|
| 162.209 | 151.092 | -17.708 | 152.048 | 154.619 | -14.181 | 187.194 | 146.677 | -22.123 | 160.698 | 151.410 | -17.390 | 172.259 | 155.532 | -13.268 | 173.804 | 157.901 | -10.899 |
| 154.196 | 144.907 | 11.207  | 143.276 | 143.854 | 10.154  | 166.802 | 139.326 | 5.626   | 155.658 | 147.444 | 13.744  | 159.830 | 146.520 | 12.820  | 147.643 | 139.544 | 5.844   |
| 147.931 | 140.071 | 6.771   | 142.313 | 142.673 | 9.373   | 161.977 | 137.587 | 4.287   | 149.274 | 142.421 | 9.121   | 152.519 | 141.219 | 7.919   | 146.451 | 138.708 | 5.408   |
| 140.716 | 134.502 | 2.102   | 133.149 | 131.426 | -0.974  | 150.710 | 133.525 | 1.125   | 138.715 | 134.112 | 1.712   | 140.913 | 132.803 | 0.403   | 141.204 | 135.026 | 2.626   |
| 139.154 | 133.296 | 4.696   | 131.606 | 129.533 | 0.933   | 150.087 | 133.300 | 4.700   | 127.986 | 125.669 | -2.931  | 131.475 | 125.960 | -2.640  | 138.829 | 133.359 | 4.759   |
| 132.669 | 128.290 | 3.090   | 130.053 | 127.627 | 2.427   | 147.918 | 132.518 | 7.318   | 126.648 | 124.616 | -0.584  | 129.054 | 124.204 | -0.996  | 131.233 | 128.029 | 2.829   |
| 123.710 | 121.375 | -3.025  | 127.378 | 124.344 | -0.056  | 127.077 | 125.005 | 0.605   | 125.668 | 123.845 | -0.555  | 128.707 | 123.952 | -0.448  | 126.257 | 124.538 | 0.138   |
| 123.105 | 120.908 | -1.592  | 126.528 | 123.301 | 0.801   | 124.712 | 124.153 | 1.653   | 121.990 | 120.951 | -1.549  | 124.170 | 120.663 | -1.837  | 125.233 | 123.819 | 1.319   |
| 122.886 | 120.739 | -1.661  | 122.232 | 118.029 | -4.371  | 118.997 | 122.092 | -0.308  | 119.884 | 119.294 | -3.106  | 120.434 | 117.954 | -4.446  | 121.139 | 120.946 | -1.454  |
| 122.539 | 120.471 | -0.529  | 120.666 | 116.107 | -4.893  | 118.156 | 121.789 | 0.789   | 117.047 | 117.061 | -3.939  | 117.452 | 115.791 | -5.209  | 111.701 | 114.324 | -6.676  |
| 112.725 | 112.895 | -3.305  | 116.741 | 111.291 | -4.909  | 117.544 | 121.569 | 5.369   | 114.909 | 115.379 | -0.821  | 116.723 | 115.263 | -0.937  | 106.505 | 110.678 | -5.522  |
| 102.571 | 105.058 | -0.042  | 116.369 | 110.834 | 5.734   | 46.707  | 96.032  | -9.068  | 109.862 | 111.407 | 6.307   | 114.656 | 113.764 | 8.664   | 100.885 | 106.734 | 1.634   |
| 0.7847  |         |         | 0.8029  |         |         | 0.7121  |         |         | 0.7422  |         |         | 0.7883  |         |         | 0.8813  |         |         |
| 4.64    |         |         | 4.90    |         |         | 5.25    |         |         | 5.15    |         |         | 4.97    |         |         | 4.09    |         |         |
| 55.73   |         |         | 58.80   |         |         | 62.97   |         |         | 61.76   |         |         | 59.59   |         |         | 49.11   |         |         |

| C-21    |         |         |
|---------|---------|---------|
| 168.022 | 155.522 | -13.278 |
| 150.937 | 142.554 | 8.854   |
| 144.967 | 138.023 | 4.723   |



137.165 132.101 -0.299  
 133.118 129.030 0.430  
 132.571 128.614 3.414  
 128.549 125.562 1.162  
 127.667 124.892 2.392  
 126.845 124.268 1.868  
 123.581 121.791 0.791  
 107.209 109.365 -6.835  
 97.408 101.926 -3.174  
 0.8594  
 3.94  
 47.22

## 6. Experimental NMR data of aaptourinamine

**Table S2.**  $^1\text{H}$ ,  $^{13}\text{C}$  NMR and key 2D NMR data of aaptourinamine <sup>a</sup>

| No | C     | H                     | HMQC  | HMBC (H→C)       | $^1\text{H}$ - $^1\text{H}$ COSY |
|----|-------|-----------------------|-------|------------------|----------------------------------|
| 2  | 124.4 | 8.71, d (6.85)        | 2, 11 | 3, 3a, 9a        | 3                                |
| 3  | 116.2 | 7.29, t (6.82)        | 3     | 2, 9b            | 2, 3a                            |
| 3a | 122.5 | 8.03, d (6.85)        | 3a    | 2, 3, 9a, 10 (w) | 3                                |
| 4  |       | 12.33, s              |       |                  | 5, 6                             |
| 5  | 125.2 | 7.25, t (2.57)        | 5     | 6, 6a, 7         | 4, 6                             |
| 6  | 105.1 | 6.95, dd (2.35, 2.05) | 6     | 5, 6a, 7         | 4, 5                             |
| 6a | 122.4 |                       |       |                  |                                  |
| 7  | 133.3 |                       |       |                  |                                  |
| 8  | 168.8 |                       |       |                  |                                  |
| 9  | 128.5 |                       |       |                  |                                  |
| 9a | 132.4 |                       |       |                  |                                  |
| 9b | 121.0 |                       |       |                  |                                  |
| 11 | 133.7 | 8.71, s               |       | 10               |                                  |

w: weak cross peak

<sup>a</sup>  $^1\text{H}$ -NMR:  $\delta_{\text{H}}$  (ppm,  $J$  in Hz), (500 MHz,  $\text{DMSO-}d_6$ ),  $^{13}\text{C}$ -NMR:  $\delta_{\text{C}}$  (ppm), (126 MHz,  $\text{DMSO-}d_6$ )

## 7. Experimental spectra of aaptourinamine

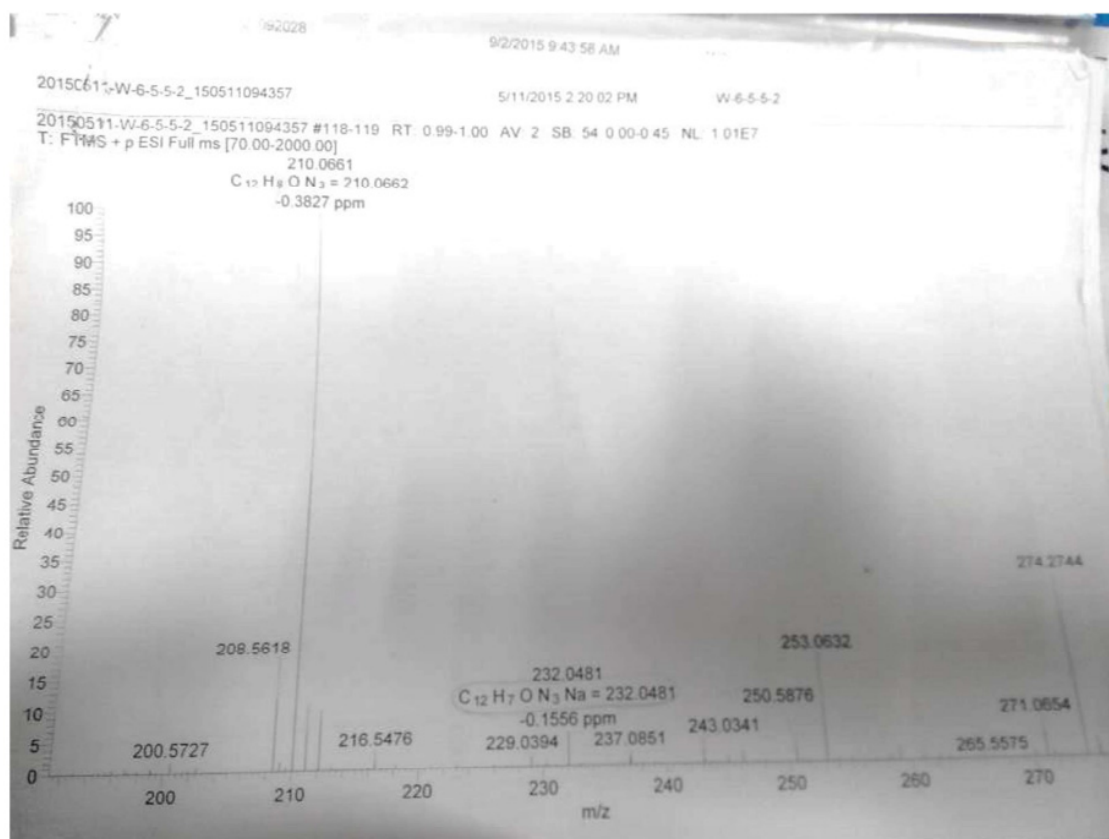

Figure S6. HRESIMS of aaptourinamine

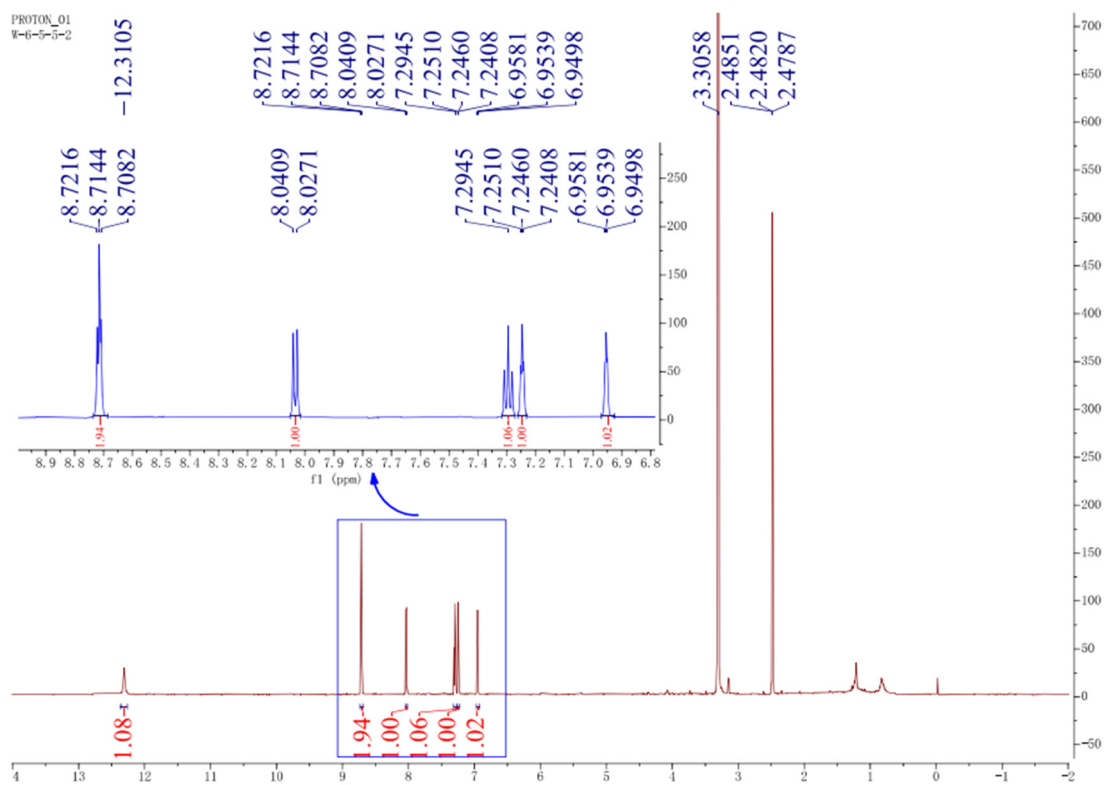

Figure S7.  $^1H$  NMR of aaptourinamine (500 MHz, DMSO)

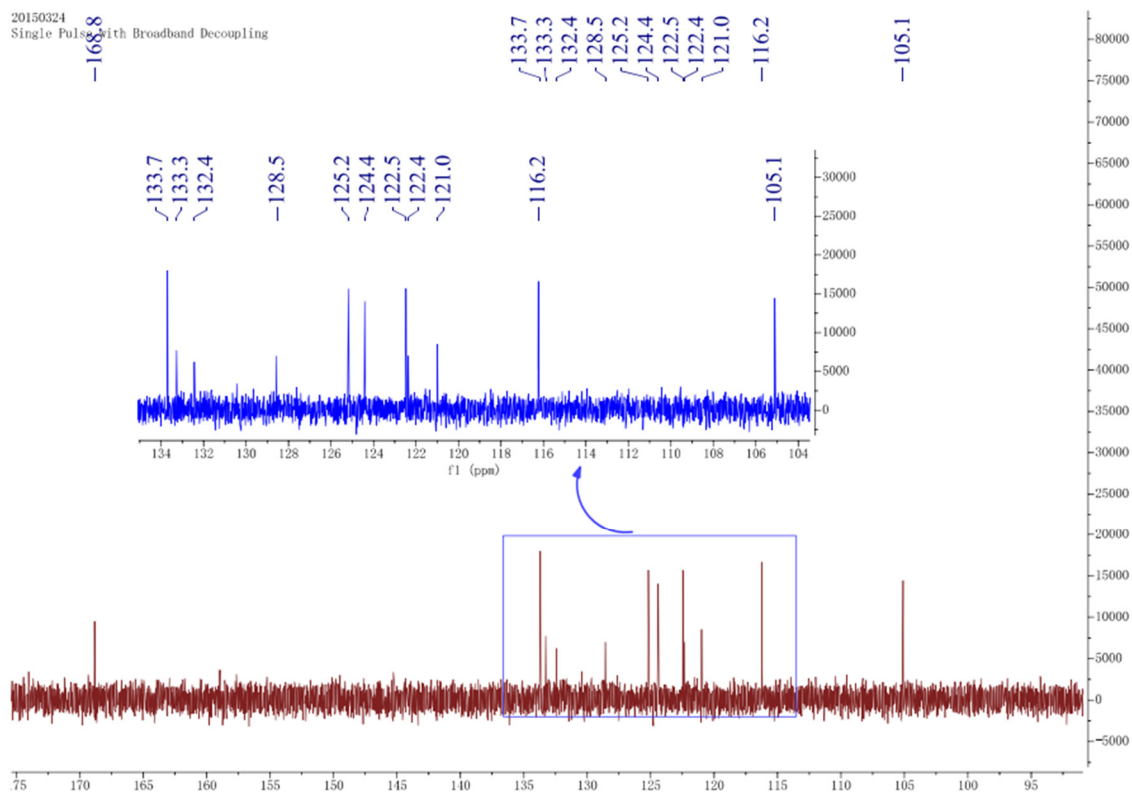

**Figure S8.**  $^{13}\text{C}$  NMR of aptourinamine (125 MHz, DMSO)

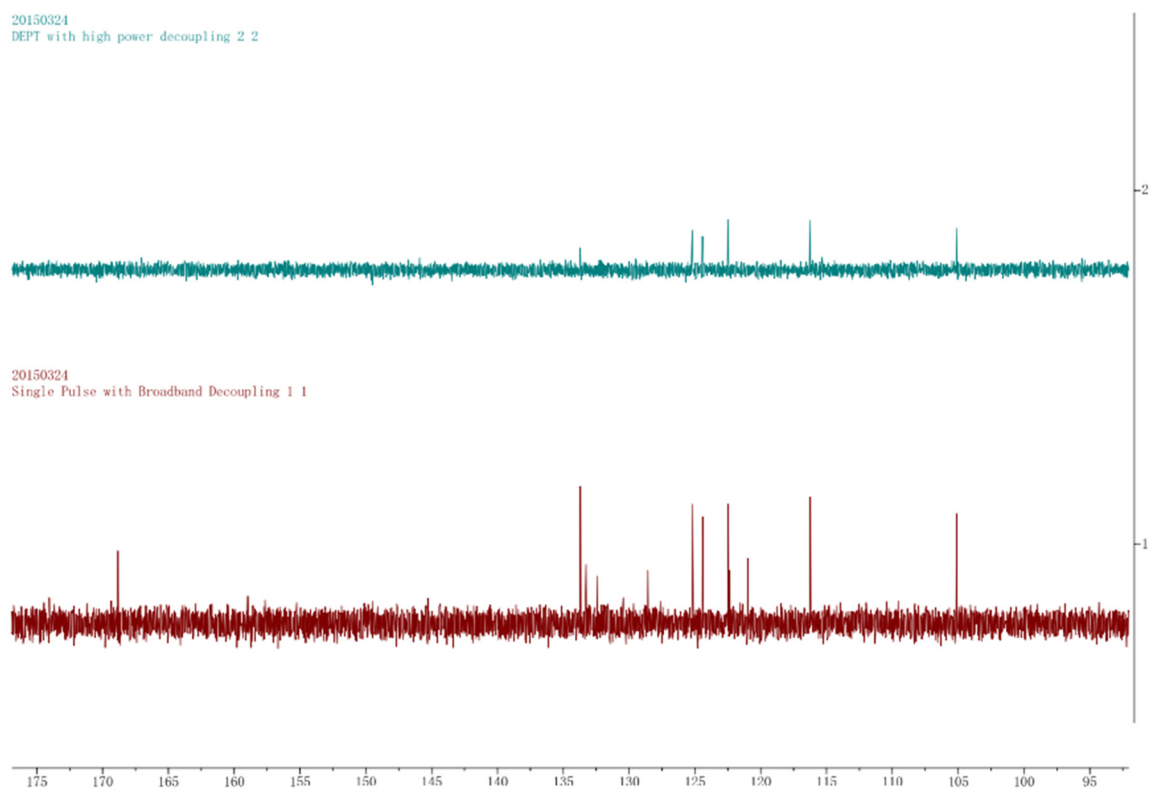

**Figure S9.** DEPT of aptourinamine (DMSO)

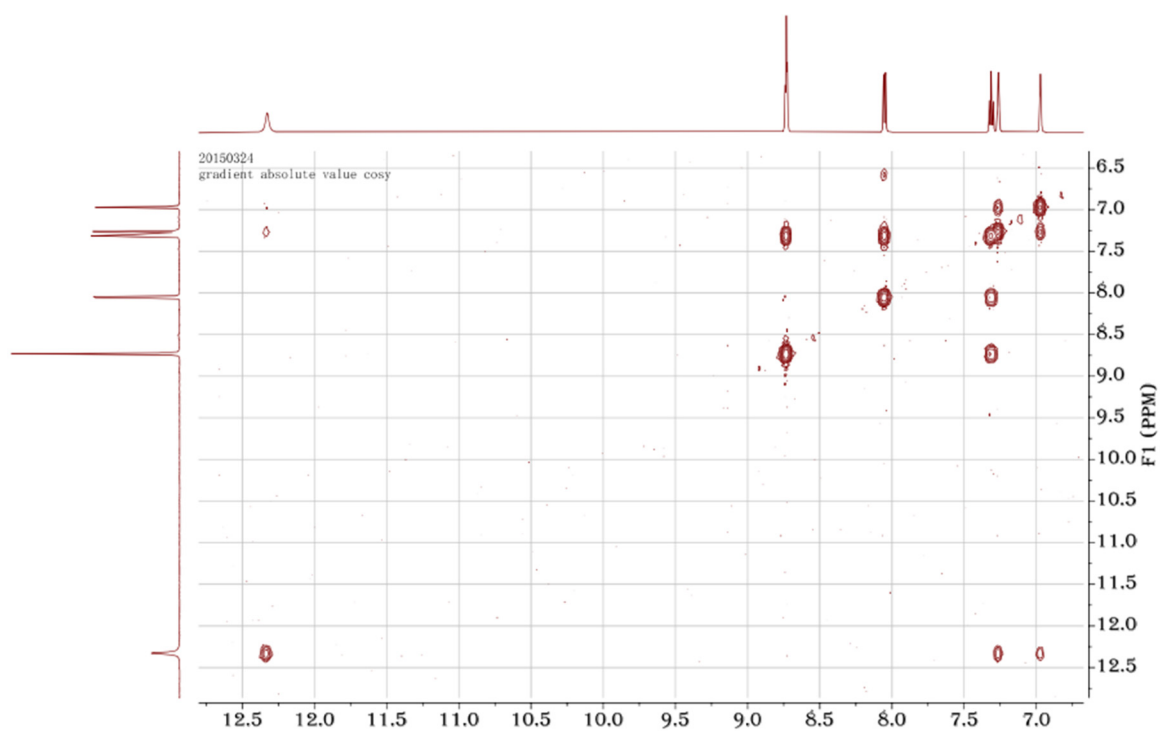

**Figure S10.**  $^1\text{H}$ - $^1\text{H}$  COSY of aptourinamine (DMSO)

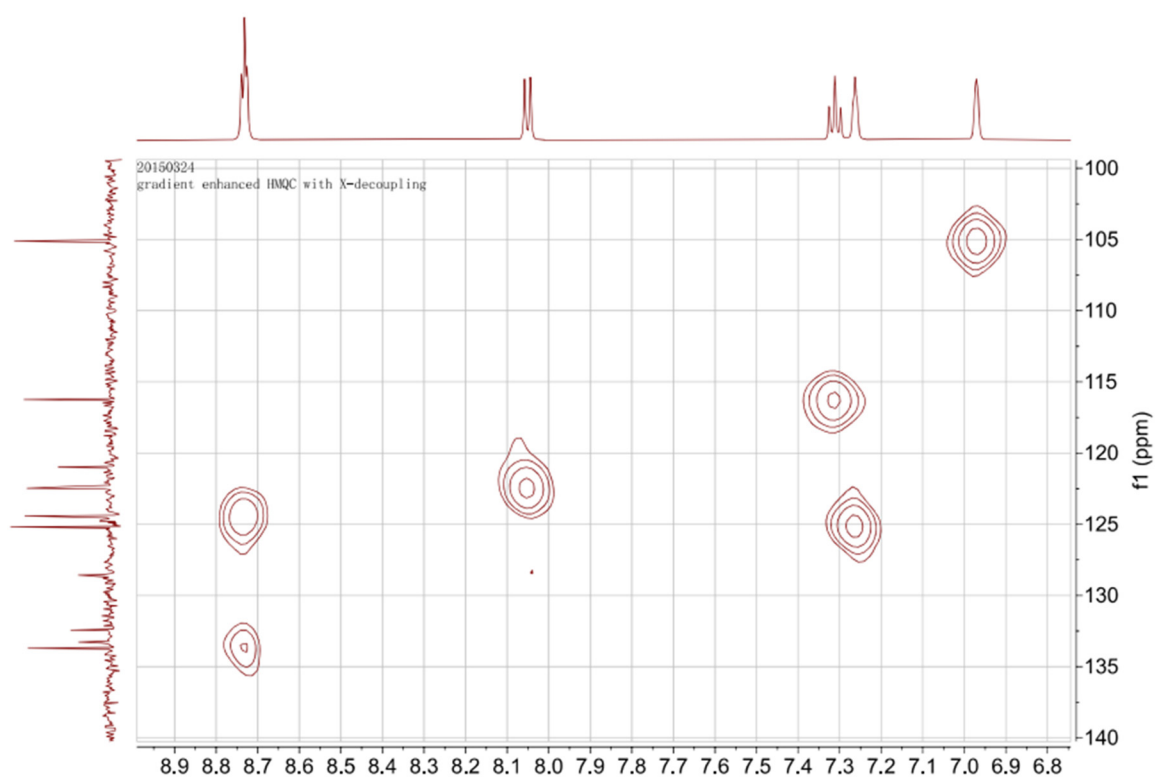

**Figure S11.** HMQC of aptourinamine (DMSO)

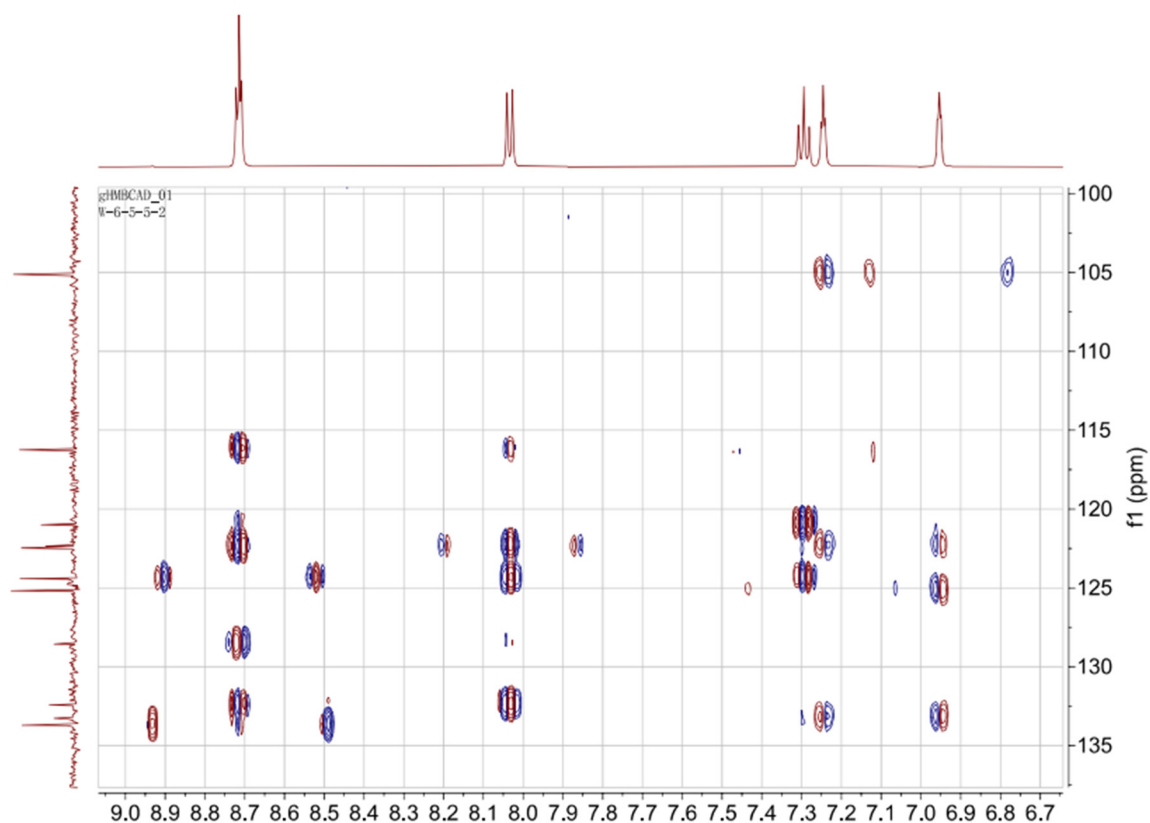

**Figure S12.** HMBC of aptourinamine (DMSO)

## Reference

32. Schrödinger. Available online: <https://www.schrodinger.com/products/macromodel> (accessed on 15 March 2021).
33. Frisch, M.; Trucks, G.; Schlegel, H.; Scuseria, G.; Robb, M.; Cheeseman, J.; Scalmani, G.; Barone, V.; Petersson, G.; Nakatsuji, H. Gaussian; Gaussian, Inc.: Wallingford, CT, USA, 2016.
34. Shermo: A General Code for Calculating Molecular Thermochemistry Properties. Available online: <http://bbs.keinsci.com/thread-17494-1-1.html> (accessed on 11 January 2021).
35. Jin, T.; Li, P.; Wang, C.; Tang, X.; Cheng, M.; Zong, Y.; Luo, L.; Ou, H.; Liu, K.; Li, G. Racemic Bisindole Alkaloids: Structure, Bioactivity, and Computational Study. *Chinese Journal of Chemistry*. *Chin. J. Chem.* **2021**, *39*, 2588-2598
