# Supplementary material for: Structural Investigation of Aaptourinamine by a Novel Module-Assembly-Based Calculation
Source: MDPI journal article supplement (doi:10.3390/md20100649), 2022-10-20
Supplement: s1 [file s1]

### Five kinds of energies calculated for aaptourinamine

|                                          | Stretch | Bond    | Stretch-Bond | Torsion | Total Energy |                                                                                        |
|------------------------------------------|---------|---------|--------------|---------|--------------|----------------------------------------------------------------------------------------|
| <div><div>G-64</div><div></div></div>    | 0.6193  | 29.4203 | -0.188       | -10.49  | 24.8857      | InChI=1S/C12H7N3O/c16-12-10-7(4-5-13-10)8-2-1-3-9-11(8)15(12)6-14-9/h1-6,13H           |
| <div><div>G-61</div><div></div></div>    | 0.8158  | 29.443  | -0.1702      | -11.61  | 27.6437      | InChI=1S/C12H7N3O/c16-12-10-8(4-5-13-10)9-3-1-2-7-6-14-15(12)11(7)9/h1-6,13H           |
| <div><div>H-41</div><div></div></div>    | 0.5838  | 24.2838 | -0.2751      | -6.96   | 28.6774      | InChI=1S/C12H7N3O/c16-10-6-7-2-1-3-9-8-4-5-13-11(8)14-12(10)15(7)9/h1-6,13H            |
| <div><div>G-77</div><div></div></div>    | 0.8842  | 36.8875 | -0.1325      | -11.61  | 29.8313      | InChI=1S/C12H7N3O/c16-12-14-6-7-2-1-3-8-9-4-5-13-11(9)15(12)10(7)9/h1-6,13H            |
| <div><div>G-72</div><div></div></div>    | 0.8379  | 35.9095 | -0.1491      | -10.49  | 30.7624      | InChI=1S/C12H7N3O/c16-10-6-14-9-3-1-2-7-8-4-5-13-12(8)15(10)11(7)9/h1-6,13H            |
| <div><div>F-36</div><div></div></div>    | 0.5524  | 24.9718 | -0.2552      | -3.18   | 30.9923      | InChI=1S/C12H7N3O/c16-10-6-11-14-12-7(4-5-13-12)8-2-1-3-9(10)15(8)11/h1-6H, 0H, 13, 14 |
| <div><div>H-89</div><div></div></div>    | 0.6614  | 27.2712 | -0.2188      | -7.96   | 33.3615      | InChI=1S/C12H7N3O/c16-11-10-8(4-5-13-10)9-3-1-2-7-6-14-12(11)15(7)9/h1-6,13H           |
| <div><div>H11-99</div><div></div></div>  | 0.6236  | 28.8637 | -0.2704      | -7.1    | 33.9255      | InChI=1S/C12H7N3O/c16-12-10-6-8-7(4-5-13-8)9-2-1-3-11(14-12)15(9)10/h1-6,13H           |
| <div><div>A-205</div><div></div></div>   | 0.6377  | 28.5779 | -0.1138      | -7.7000 | 34.6231      | InChI=1S/C12H7N3O/c16-12-9-7(3-4-13-9)8-2-1-5-15-6-14-10(12)11(8)15/h1-6,13H           |
| <div><div>H11-144</div><div></div></div> | 0.552   | 28.2809 | -0.1965      | -4.18   | 35.5961      | InChI=1S/C12H7N3O/c16-12-9-6-14-10-3-1-2-8(15)(9)10(7)-4-5-13-11(7)12/h1-6,13H         |
| <div><div>A-2</div><div></div></div>     | 0.5225  | 35.5435 | -0.4186      | -5.11   | 36.5923      | InChI=1S/C12H7N3O/c16-9-6-14-12-10(9)11-7(3-4-13-11)8-2-1-5-15(8)12/h1-6,13H           |
| <div><div>G-13</div><div></div></div>    | 0.8976  | 35.7206 | -0.0883      | -8.83   | 36.7221      | InChI=1S/C12H7N3O/c16-10-6-14-15-11-7(2-1-3-9(10)11)8-4-5-13-12(8)14-10/h1-6,13H       |
| <div><div>B-15</div><div></div></div>    | 0.6383  | 37.0653 | -0.4954      | -6.8300 | 36.7441      | InChI=1S/C12H7N3O/c16-10-6-8-11-7(3-4-13-11)9-2-1-5-15(9)12(8)14-10/h1-6,13H           |
| <div><div>A-43</div><div></div></div>    | 0.7851  | 29.5535 | -0.1306      | -5.04   | 36.8764      | InChI=1S/C12H7N3O/c16-12-9-6-14-15-5-1-2-8(11)(9)15)7-3-4-13-10(7)12/h1-6,13H          |
| <div><div>H-58</div><div></div></div>    | 1.0299  | 33.8094 | -0.2722      | -8.89   | 37.8158      | InChI=1S/C12H7N3O/c16-10-6-7-2-1-3-9-8-4-5-13-11(8)12(14-10)15(7)9/h1-6,13H            |
| <div><div>A-7</div><div></div></div>     | 0.569   | 35.9588 | -0.3973      | -6.77   | 38.4748      | InChI=1S/C12H7N3O/c16-9-6-14-11-10-7(3-4-13-10)8-2-1-5-15(8)12(9)11/h1-6,13H           |
| <div><div>G-32</div><div></div></div>    | 1.0393  | 37.8963 | -0.1479      | -8.83   | 38.7282      | InChI=1S/C12H7N3O/c16-12-9-3-1-2-7-8-4-5-13-11(8)15(6-14-12)10(7)9/h1-6,13H            |
| <div><div>O-249</div><div></div></div>   | 0.5836  | 37.7969 | -0.4667      | -6.83   | 38.925       | InChI=1S/C12H7N3O/c16-10-6-7-8-2-1-5-15(8)9-3-4-13-12(9)11(7)14-10/h1-6,13H            |

|                |                                                                                     |        |         |         |          |         |                                                                                |
|----------------|-------------------------------------------------------------------------------------|--------|---------|---------|----------|---------|--------------------------------------------------------------------------------|
| <b>H11-107</b> |    | 1.0345 | 35.2572 | -0.2758 | -7.83    | 39.4141 | InChI=1S/C12H7N3O/c16-11-6-9-12-7(4-5-13-12)8-2-1-3-10(14-11)15(8)9/h1-6,13H   |
| <b>B-36</b>    |    | 0.5700 | 37.8115 | -0.4635 | -6.8300  | 39.4375 | InChI=1S/C12H7N3O/c16-10-6-9-12(14-10)11-7(3-4-13-11)8-2-1-5-15(8)9/h1-6,13H   |
| <b>n-112</b>   |    | 0.5505 | 36.5458 | -0.3962 | -4.18    | 40.0021 | InChI=1S/C12H7N3O/c16-9-6-14-12-10(9)7-2-1-5-15(7)8-3-4-13-11(8)12/h1-6,13H    |
| <b>o-246</b>   |    | 0.6213 | 37.8819 | -0.4702 | -4.9     | 40.4893 | InChI=1S/C12H7N3O/c16-10-6-7-11-9(3-4-13-11)15-5-1-2-8(15)12(7)14-10/h1-6,13H  |
| <b>n-116</b>   |    | 0.5705 | 36.6427 | -0.3974 | -3.18    | 40.6556 | InChI=1S/C12H7N3O/c16-9-6-14-12-7-2-1-5-15(7)8-3-4-13-11(8)10(9)12/h1-6,13H    |
| <b>A-77</b>    |    | 0.7588 | 39.8004 | -0.4695 | -6.83    | 42.5764 | InChI=1S/C12H7N3O/c16-12-11-8(6-14-12)10-7(3-4-13-10)9-2-1-5-15(9)11/h1-6,13H  |
| <b>n-188</b>   |    | 0.6841 | 40.6443 | -0.4488 | -5.17    | 43.2659 | InChI=1S/C12H7N3O/c16-12-10-7(6-14-12)8-2-1-5-15(8)9-3-4-13-11(9)10/h1-6,13H   |
| <b>A-79</b>    |    | 0.6046 | 40.439  | -0.4409 | -5.17    | 43.4986 | InChI=1S/C12H7N3O/c16-12-10-9(6-14-12)15-5-1-2-8(15)7-3-4-13-11(7)10/h1-6,13H  |
| <b>n-187</b>   |   | 0.711  | 40.6044 | -0.455  | -4.24    | 44.1716 | InChI=1S/C12H7N3O/c16-12-10-7(6-14-12)11-9(3-4-13-11)15-5-1-2-8(10)15/h1-6,13H |
| <b>G1-79</b>   |  | 0.981  | 54.2429 | -0.311  | -10.49   | 44.8958 | InChI=1S/C12H7N3O/c16-9-3-1-2-8-7-4-5-13-10(7)11-12(8)15(9)6-14-11/h1-6,13H    |
| <b>C-43</b>    |  | 0.6313 | 54.2300 | -0.2471 | -5.7000  | 45.9080 | InChI=1S/C12H7N3O/c16-10-6-9-11-7(2-1-4-13-9)8-3-5-14-12(8)15(10)11/h1-6,14H   |
| <b>C-39</b>    |  | 0.8105 | 54.9447 | -0.2788 | -10.5500 | 46.8038 | InChI=1S/C12H7N3O/c16-10-6-9-11-7(3-5-13-11)8-2-1-4-14-15(10)12(8)9/h1-6,13H   |
| <b>n-123</b>   |  | 0.8613 | 35.2223 | -0.0886 | -2.12    | 47.2803 | InChI=1S/C12H7N3O/c16-9-6-14-11-10-8(3-4-13-10)15-5-1-2-7(9)12(11)15/h1-6,13H  |
| <b>n-198</b>   |  | 0.917  | 38.6938 | -0.099  | -5.17    | 47.865  | InChI=1S/C12H7N3O/c16-12-9-10-8(3-4-13-10)15-5-1-2-7(6-14-12)11(9)15/h1-6,13H  |
| <b>n-210</b>   |  | 1.0813 | 37.8015 | -0.1408 | -4.11    | 48.1425 | InChI=1S/C12H7N3O/c16-12-7-2-1-5-15-9-3-4-13-10(9)8(6-14-12)11(7)15/h1-6,13H   |
| <b>n-113</b>   |  | 0.8463 | 37.3669 | -0.0777 | -2.12    | 48.6871 | InChI=1S/C12H7N3O/c16-9-6-14-7-2-1-5-15-8-3-4-13-11(8)10(9)12(7)15/h1-6,13H    |
| <b>G1-55</b>   |  | 1.3235 | 55.7794 | -0.287  | -10.55   | 49.9772 | InChI=1S/C12H7N3O/c16-10-3-1-2-8-7-4-5-13-11(7)9-6-14-15(10)12(8)9/h1-6,13H    |
| <b>A2-61</b>   |  | 0.8459 | 51.0599 | -0.301  | -5.9     | 51.7907 | InChI=1S/C12H7N3O/c16-10-6-9-11-7(3-5-13-11)8-2-1-4-14-12(10)15(8)9/h1-6,13H   |
| <b>D-16</b>    |  | 0.7350 | 52.8473 | -0.2477 | -3.1800  | 54.2489 | InChI=1S/C12H7N3O/c16-9-6-10-13-4-1-2-8-7-3-5-14-11(7)12(9)15(8)10/h1-6,14H    |

|               |                                                                                     |        |         |         |          |         |                                                                                       |
|---------------|-------------------------------------------------------------------------------------|--------|---------|---------|----------|---------|---------------------------------------------------------------------------------------|
| <b>G1-38</b>  |    | 0.9427 | 56.1479 | -0.2363 | -5.04    | 54.8006 | InChI=1S/C12H7N3O/c16-10-3-1-2-7-8-4-5-13-12(8)15-11(7)9(10)6-14-15/h1-6,13H          |
|               | $C_{12}H_7N_3O$                                                                     |        |         |         |          |         |                                                                                       |
| <b>H1-75</b>  |    | 0.7912 | 54.3054 | -0.2516 | -4.18    | 55.8908 | InChI=1S/C12H7N3O/c16-10-3-1-2-8-7-4-5-13-11(7)12-14-6-9(10)15(8)12/h1-6,13H          |
|               | $C_{12}H_7N_3O$                                                                     |        |         |         |          |         |                                                                                       |
| <b>I-85</b>   |    | 0.9012 | 52.3096 | -0.1927 | -3.91    | 57.1763 | InChI=1S/C12H7N3O/c16-9-6-7-10-8(2-4-14-10)15-5-1-3-13-11(9)12(7)15/h1-6,14H          |
|               | $C_{12}H_7N_3O$                                                                     |        |         |         |          |         |                                                                                       |
| <b>H1-51</b>  |    | 1.0726 | 56.0431 | -0.2987 | -6.9     | 57.5894 | InChI=1S/C12H7N3O/c16-10-3-1-2-8-7-4-5-13-11(7)9-6-14-12(10)15(8)9/h1-6,13H           |
|               | $C_{12}H_7N_3O$                                                                     |        |         |         |          |         |                                                                                       |
| <b>H-148</b>  |    | 1.2972 | 83.1531 | -0.6288 | -13.54   | 60.1273 | InChI=1S/C12H7N3O/c16-12-14-10-6-7-2-1-3-8(7)9-4-5-13-11(9)15(10)12/h1-6,13H          |
|               | $C_{12}H_7N_3O$                                                                     |        |         |         |          |         |                                                                                       |
| <b>I-86</b>   |    | 0.9725 | 55.0755 | -0.1842 | -1.19    | 60.6569 | InChI=1S/C12H7N3O/c16-9-6-7-12-10(9)11-8(2-4-14-11)15(12)5-1-3-13-7/h1-6,14H          |
|               | $C_{12}H_7N_3O$                                                                     |        |         |         |          |         |                                                                                       |
| <b>H-149</b>  |    | 1.2305 | 83.0582 | -0.6034 | -13.54   | 63.052  | InChI=1S/C12H7N3O/c16-12-14-11-10-9(4-5-13-10)8-3-1-2-7(8)6-15(11)12/h1-6,13H         |
|               | $C_{12}H_7N_3O$                                                                     |        |         |         |          |         |                                                                                       |
| <b>H11-68</b> |    | 0.8853 | 81.6821 | -0.661  | -8.56    | 63.1592 | InChI=1S/C12H7N3O/c16-11-6-10-14-9-3-1-2-7(9)8-4-5-13-12(8)15(10)11/h1-6,13H          |
|               | $C_{12}H_7N_3O$                                                                     |        |         |         |          |         |                                                                                       |
| <b>F-44</b>   |   | 0.8885 | 81.6812 | -0.6786 | -8.56    | 64.7771 | InChI=1S/C12H7N3O/c16-11-6-10-14-12-8(4-5-13-12)7-2-1-3-9(7)15(10)11/h1-6H, (H,13,14) |
|               | $C_{12}H_7N_3O$                                                                     |        |         |         |          |         |                                                                                       |
| <b>F-39</b>   |  | 0.854  | 82.0203 | -0.6834 | -12.54   | 66.0692 | InChI=1S/C12H7N3O/c16-11-6-10-8-3-1-2-7(8)9-4-5-13-12(9)14-15(10)11/h1-6H, (H,13,14)  |
|               | $C_{12}H_7N_3O$                                                                     |        |         |         |          |         |                                                                                       |
| <b>G1-108</b> |  | 1.2199 | 75.9162 | -0.6734 | -7.83    | 67.6958 | InChI=1S/C12H7N3O/c16-10-3-1-2-9-7-4-5-13-11(7)8-6-14-12(8)15(9)10/h1-6,13H           |
|               | $C_{12}H_7N_3O$                                                                     |        |         |         |          |         |                                                                                       |
| <b>G1-80</b>  |  | 1.1488 | 75.9844 | -0.6595 | -6.77    | 68.3645 | InChI=1S/C12H7N3O/c16-10-3-1-2-8-7-4-5-13-11(7)12-9(6-14-12)15(8)10/h1-6,13H          |
|               | $C_{12}H_7N_3O$                                                                     |        |         |         |          |         |                                                                                       |
| <b>H11-60</b> |  | 0.787  | 82.1482 | -0.6714 | -10.55   | 68.7169 | InChI=1S/C12H7N3O/c16-11-6-10-12-8(4-5-13-12)7-2-1-3-9(7)14-15(10)11/h1-6,13H         |
|               | $C_{12}H_7N_3O$                                                                     |        |         |         |          |         |                                                                                       |
| <b>C-42</b>   |  | 1.3450 | 78.3761 | -0.4861 | -5.7600  | 69.0697 | InChI=1S/C12H7N3O/c16-10-6-9-11-7(2-1-4-13-11)8-3-5-14-12(8)15(9)10/h1-6,14H          |
|               | $C_{12}H_7N_3O$                                                                     |        |         |         |          |         |                                                                                       |
| <b>C-44</b>   |  | 1.1679 | 78.3801 | -0.4984 | -6.7600  | 71.5441 | InChI=1S/C12H7N3O/c16-10-6-9-11-7(3-5-13-11)8-2-1-4-14-12(8)15(9)10/h1-6,13H          |
|               | $C_{12}H_7N_3O$                                                                     |        |         |         |          |         |                                                                                       |
| <b>H-52</b>   |  | 0.8016 | 87.3188 | -0.5391 | -7.82    | 72.1239 | InChI=1S/C12H7N3O/c16-10-6-7-2-1-3-9-8-4-5-13-11(8)14-12(9)15(7)10/h1-6,13H           |
|               | $C_{12}H_7N_3O$                                                                     |        |         |         |          |         |                                                                                       |
| <b>B-138</b>  |  | 1.2784 | 92.3785 | -0.4982 | -12.5400 | 72.1450 | InChI=1S/C12H7N3O/c16-12-14-11-9-6-10-8(3-4-13-10)7(9)2-1-5-15(11)12/h1-6,13H         |
|               | $C_{12}H_7N_3O$                                                                     |        |         |         |          |         |                                                                                       |
| <b>B-40</b>   |  | 0.7982 | 87.0260 | -0.5086 | -5.7600  | 72.4208 | InChI=1S/C12H7N3O/c16-10-6-9-11-7(2-1-5-15(9)10)8-3-4-13-12(8)14-11/h1-6,13H          |
|               | $C_{12}H_7N_3O$                                                                     |        |         |         |          |         |                                                                                       |
| <b>H11-2</b>  |  | 1.2809 | 92.7054 | -0.5258 | -12.48   | 72.6091 | InChI=1S/C12H7N3O/c16-12-14-11-3-1-2-8-7-4-5-13-9(7)6-10(8)15(11)12/h1-6,13H          |
|               | $C_{12}H_7N_3O$                                                                     |        |         |         |          |         |                                                                                       |

|                |                                                                                     |        |         |         |         |         |                                                                                      |
|----------------|-------------------------------------------------------------------------------------|--------|---------|---------|---------|---------|--------------------------------------------------------------------------------------|
| <b>C-66</b>    |    | 1.7689 | 79.1033 | -0.3733 | -5.7000 | 74.4022 | InChI=1S/C12H7N3O/c16-12-10-7(3-5-14-10)8-2-1-4-13-9-6-15(12)11(8)9/h1-6,14H         |
|                | $C_{12}H_7N_3O$                                                                     |        |         |         |         |         |                                                                                      |
| <b>A-159</b>   |    | 1.5223 | 82.2859 | -0.2297 | -7.69   | 75.4238 | InChI=1S/C12H7N3O/c16-12-10-11-8(2-1-5-15(11)12)7-3-4-13-9(7)6-14-10/h1-6,13H        |
|                | $C_{12}H_7N_3O$                                                                     |        |         |         |         |         |                                                                                      |
| <b>G1-97</b>   |    | 1.0219 | 78.9743 | -0.5496 | -6.04   | 77.8141 | InChI=1S/C12H7N3O/c16-9-3-1-2-7-8-4-5-13-11(8)15-6-14-12(15)10(7)9/h1-6,13H          |
|                | $C_{12}H_7N_3O$                                                                     |        |         |         |         |         |                                                                                      |
| <b>B-13</b>    |    | 1.0570 | 79.4923 | -0.7905 | -6.8300 | 78.5829 | InChI=1S/C12H7N3O/c16-10-6-8-11-7(3-4-13-11)9-2-1-5-15(9)14-12(8)10/h1-6,13H         |
|                | $C_{12}H_7N_3O$                                                                     |        |         |         |         |         |                                                                                      |
| <b>G1-60</b>   |    | 1.1444 | 77.2593 | -0.6814 | -7.1    | 79.5073 | InChI=1S/C12H7N3O/c16-10-3-1-2-7-8-4-5-13-12(8)15-9(6-14-15)11(7)10/h1-6,13H         |
|                | $C_{12}H_7N_3O$                                                                     |        |         |         |         |         |                                                                                      |
| <b>B-30</b>    |    | 0.9009 | 77.6844 | -0.7592 | -4.9700 | 79.6273 | InChI=1S/C12H7N3O/c16-10-6-9-11(10)14-12-7(3-4-13-12)8-2-1-5-15(8)9/h1-6,13H         |
|                | $C_{12}H_7N_3O$                                                                     |        |         |         |         |         |                                                                                      |
| <b>G-19</b>    |    | 2.0473 | 89.6073 | -0.2082 | -7.83   | 79.7694 | InChI=1S/C12H7N3O/c16-12-9-3-1-2-7-8-4-5-13-11(8)14-6-15(12)10(7)9/h1-6,13H          |
|                | $C_{12}H_7N_3O$                                                                     |        |         |         |         |         |                                                                                      |
| <b>G-18</b>    |    | 1.7607 | 86.3927 | -0.2874 | -9.82   | 80.1332 | InChI=1S/C12H7N3O/c16-12-9-3-1-2-8-7-4-5-13-10(7)6-14-15(12)11(8)9/h1-6,13H          |
|                | $C_{12}H_7N_3O$                                                                     |        |         |         |         |         |                                                                                      |
| <b>B-190</b>   |    | 1.5813 | 82.5811 | -0.8318 | -7.8300 | 80.1895 | InChI=1S/C12H7N3O/c16-12-11-8(6-14-11)10-7(3-4-13-10)9-2-1-5-15(9)12/h1-6,13H        |
|                | $C_{12}H_7N_3O$                                                                     |        |         |         |         |         |                                                                                      |
| <b>o-81</b>    |   | 1.244  | 78.5981 | -0.8352 | -3.91   | 80.5002 | InChI=1S/C12H7N3O/c16-9-6-7-11-8(3-4-13-11)15-5-1-2-10(15)14-12(7)9/h1-6,13H         |
|                | $C_{12}H_7N_3O$                                                                     |        |         |         |         |         |                                                                                      |
| <b>H-103</b>   |  | 1.7507 | 72.8837 | -0.4563 | -7.96   | 80.6798 | InChI=1S/C12H7N3O/c16-12-11-8(4-5-13-11)9-3-1-2-7-6-10(14-12)15(7)9/h1-6,13H         |
|                | $C_{12}H_7N_3O$                                                                     |        |         |         |         |         |                                                                                      |
| <b>H1-53</b>   |  | 0.912  | 79.7585 | -0.3846 | -7.83   | 81.0946 | InChI=1S/C12H7N3O/c16-10-3-1-2-9-7-4-5-13-8(7)6-11-14-12(10)15(9)11/h1-6,13H         |
|                | $C_{12}H_7N_3O$                                                                     |        |         |         |         |         |                                                                                      |
| <b>C-17</b>    |  | 1.4916 | 88.4519 | -0.3243 | -9.8200 | 81.8663 | InChI=1S/C12H7N3O/c16-12-9-6-10-7(3-5-13-10)8-2-1-4-14-15(12)11(8)9/h1-6,13H         |
|                | $C_{12}H_7N_3O$                                                                     |        |         |         |         |         |                                                                                      |
| <b>H11-156</b> |  | 1.5683 | 79.0011 | -0.3076 | -5.84   | 82.1499 | InChI=1S/C12H7N3O/c16-9-6-11-14-10-3-1-2-8(15(10)11)7-4-5-13-12(7)9/h1-6,13H         |
|                | $C_{12}H_7N_3O$                                                                     |        |         |         |         |         |                                                                                      |
| <b>B-128</b>   |  | 1.1807 | 82.3227 | -0.8142 | -7.1000 | 82.1757 | InChI=1S/C12H7N3O/c16-12-8-6-9-7(3-4-13-9)10-2-1-5-15(10)11(8)14-12/h1-6,13H         |
|                | $C_{12}H_7N_3O$                                                                     |        |         |         |         |         |                                                                                      |
| <b>A-50</b>    |  | 2.0704 | 89.0358 | -0.1434 | -4.97   | 82.4838 | InChI=1S/C12H7N3O/c16-12-9-6-14-11-8(3-4-13-11)7-2-1-5-15(12)10(7)9/h1-6,13H         |
|                | $C_{12}H_7N_3O$                                                                     |        |         |         |         |         |                                                                                      |
| <b>H1-139</b>  |  | 1.1673 | 75.4039 | -0.4689 | -2.2499 | 83.0307 | InChI=1S/C12H7N3O/c16-10-3-1-2-8-7-4-5-13-12(7)14-11-6-9(10)15(8)11/h1-6,13H         |
|                | $C_{12}H_7N_3O$                                                                     |        |         |         |         |         |                                                                                      |
| <b>F-34</b>    |  | 0.9843 | 85.2549 | -0.6054 | -5.17   | 83.3222 | InChI=1S/C12H7N3O/c16-11-6-10-7(11)2-1-3-9-8-4-5-13-12(8)14-15(9)10/h1-6H, (H,13,14) |
|                | $C_{12}H_7N_3O$                                                                     |        |         |         |         |         |                                                                                      |
| <b>B-177</b>   |  | 1.5548 | 85.6303 | -0.8151 | -5.1100 | 83.8586 | InChI=1S/C12H7N3O/c16-12-8-6-14-11(8)10-7(3-4-13-10)9-2-1-5-15(9)12/h1-6,13H         |
|                | $C_{12}H_7N_3O$                                                                     |        |         |         |         |         |                                                                                      |

|               |                                                                                     |        |          |         |         |         |                                                                                           |
|---------------|-------------------------------------------------------------------------------------|--------|----------|---------|---------|---------|-------------------------------------------------------------------------------------------|
| <b>H-96</b>   |    | 1.445  | 89.9564  | -0.6485 | -8.89   | 84.2638 | InChI=1S/C12H7N3O/c16-12-10-8(4-5-13-10)9-3-1-2-7-6-14-11(7)15(9)12/h1-6,13H              |
| <b>A2-65</b>  |    | 1.1108 | 75.2129  | -0.3873 | -2.25   | 84.631  | InChI=1S/C12H7N3O/c16-12-9-6-10-13-4-1-2-8(15(9)10)7-3-5-14-11(7)12/h1-6,14H              |
| <b>I-85</b>   |    | 1.6193 | 72.7872  | -0.2913 | -3.05   | 84.9833 | InChI=1S/C12H7N3O/c16-12-7-6-8-11(7)15(5-1-3-13-8)9-2-4-14-10(9)12/h1-6,14H               |
| <b>D-15</b>   |    | 1.6918 | 79.0777  | -0.6035 | -5.1700 | 85.0092 | InChI=1S/C12H7N3O/c16-10-6-9-11(10)12-7(3-5-13-12)8-2-1-4-14-15(8)9/h1-6,13H              |
| <b>o-152</b>  |    | 0.9309 | 86.2884  | -0.655  | -3.18   | 85.3147 | InChI=1S/C12H7N3O/c16-10-6-8-7(10)2-1-5-15-9-3-4-13-11(9)14-12(8)15/h1-6,13H              |
| <b>G-37</b>   |    | 0.9748 | 90.3349  | -0.5259 | -7.7    | 85.7224 | InChI=1S/C12H7N3O/c16-12-10-7(4-5-13-10)8-2-1-3-9-14-6-15(9)11(8)12/h1-6,13H              |
| <b>F-32</b>   |    | 1.3256 | 77.2465  | -0.376  | -5.3    | 86.0534 | InChI=1S/C12H7N3O/c16-12-10-6-7-2-1-3-9(15(7)10)8-4-5-13-11(8)14-12/h1-6H, 10, 13, 14, 16 |
| <b>H11-82</b> |    | 1.3344 | 91.8828  | -0.6199 | -7.83   | 86.6297 | InChI=1S/C12H7N3O/c16-12-11-7(4-5-13-11)9-3-1-2-8-10(6-14-8)15(9)12/h1-6,13H              |
| <b>B-175</b>  |    | 0.9905 | 82.8896  | -0.7618 | -3.2500 | 86.9107 | InChI=1S/C12H7N3O/c16-11-8-6-14-12(8)15-5-1-2-9(15)7-3-4-13-10(7)11/h1-6,13H              |
| <b>B-194</b>  |   | 0.9614 | 81.7212  | -0.7108 | -5.9700 | 87.1129 | InChI=1S/C12H7N3O/c16-12-10-7(3-4-13-10)8-2-1-5-15(8)9-6-14-11(9)12/h1-6,13H              |
| <b>G-82</b>   |  | 2.284  | 96.201   | -0.297  | -12.61  | 87.436  | InChI=1S/C12H7N3O/c16-12-14-6-7-2-1-3-9-8-4-5-13-10(8)11(9)15(7)12/h1-6,13H               |
| <b>x4-8</b>   |  | 3.0846 | 101.9716 | -0.3211 | -8.56   | 87.5633 | InChI=1S/C12H7N3O/c16-9-6-14-12-10-8(15(9)12)3-1-2-7-4-5-13-11(7)10/h1-6,13H              |
| <b>A-193</b>  |  | 0.8324 | 90.9855  | -0.5203 | -6.04   | 87.7987 | InChI=1S/C12H7N3O/c16-11-9-7(8-3-4-13-10(8)11)2-1-5-15-6-14-12(9)15/h1-6,13H              |
| <b>G-36</b>   |  | 1.2165 | 88.634   | -0.6581 | -9.82   | 88.9444 | InChI=1S/C12H7N3O/c16-12-10-8(4-5-13-10)9-3-1-2-7-6-14-15(7)11(9)12/h1-6,13H              |
| <b>n-130</b>  |  | 1.3745 | 83.0542  | -0.7384 | -5.97   | 88.9725 | InChI=1S/C12H7N3O/c16-12-10-7(6-14-10)8-2-1-5-15(8)9-3-4-13-11(9)12/h1-6,13H              |
| <b>A-100</b>  |  | 1.0557 | 89.4209  | -0.7002 | -7.1    | 89.1989 | InChI=1S/C12H7N3O/c16-12-10-7(8-3-4-13-11(8)12)2-1-5-15-9(10)6-14-15/h1-6,13H             |
| <b>o-212</b>  |  | 1.686  | 85.8072  | -0.8108 | -5.17   | 89.4196 | InChI=1S/C12H7N3O/c16-12-7-6-8-9(3-4-13-8)15-5-1-2-10(15)11(7)14-12/h1-6,13H              |
| <b>I-62</b>   |  | 1.9738 | 79.8974  | -0.6684 | -2.25   | 89.4926 | InChI=1S/C12H7N3O/c16-9-6-7-10(9)12-14-3-1-5-15(12)8-2-4-13-11(7)8/h1-6,13H               |
| <b>B-212</b>  |  | 1.6979 | 86.0119  | -0.8287 | -6.0400 | 89.4981 | InChI=1S/C12H7N3O/c16-12-8-6-15-5-1-2-9(15)7-3-4-13-10(7)11(8)14-12/h1-6,13H              |

|               |                                                                                     |        |          |         |         |         |                                                                                       |
|---------------|-------------------------------------------------------------------------------------|--------|----------|---------|---------|---------|---------------------------------------------------------------------------------------|
| <b>o-220</b>  |    | 1.9073 | 86.5404  | -0.8223 | -6.17   | 89.8284 | InChI=1S/C12H7N3O/c16-12-8-6-7-2-1-5-15(7)9-3-4-13-11(9)10(8)14-12/h1-6,13H           |
| <b>A-93</b>   |    | 2.4599 | 97.9078  | -0.3783 | -12.48  | 89.9282 | InChI=1S/C12H7N3O/c16-12-14-6-9-10-7(2-1-5-15(9)12)8-3-4-13-11(8)10/h1-6,13H          |
| <b>G-74</b>   |    | 2.3269 | 97.8878  | -0.3522 | -10.49  | 90.5347 | InChI=1S/C12H7N3O/c16-10-6-14-9-3-1-2-8-7-4-5-13-11(7)12(8)15(9)10/h1-6,13H           |
| <b>C-13</b>   |    | 1.6486 | 83.4726  | -0.2891 | -5.0400 | 91.6469 | InChI=1S/C12H7N3O/c16-12-9-6-15-11(9)8(2-1-4-14-15)7-3-5-13-10(7)12/h1-6,13H          |
| <b>o-12</b>   |    | 1.7845 | 83.452   | -0.748  | -3.25   | 92.16   | InChI=1S/C12H7N3O/c16-12-9-2-1-5-15(9)8-3-4-13-10(8)7-6-14-11(7)12/h1-6,13H           |
| <b>A-29</b>   |    | 2.3045 | 98.5626  | -0.3666 | -9.49   | 92.7921 | InChI=1S/C12H7N3O/c16-9-6-14-12-10-7(2-1-5-15(9)12)8-3-4-13-11(8)10/h1-6,13H          |
| <b>q11-33</b> |    | 3.0117 | 105.9451 | -0.2067 | -9.56   | 93.2161 | InChI=1S/C12H7N3O/c16-10-6-9-14-12-8(15(9)10)3-1-2-7-4-5-13-11(7)12/h1-6,13H          |
| <b>n-168</b>  |    | 1.679  | 80.5456  | -0.2721 | -2.25   | 93.639  | InChI=1S/C12H7N3O/c16-12-7-2-1-5-15-9-3-4-13-8(9)6-14-10(12)11(7)15/h1-6,13H          |
| <b>n11-45</b> |   | 3.0985 | 106.4455 | -0.25   | -9.56   | 93.6818 | InChI=1S/C12H7N3O/c16-10-6-9-14-8-3-1-2-7-4-5-13-11(7)12(8)15(9)10/h1-6,13H           |
| <b>n-129</b>  |  | 1.2359 | 89.5579  | -0.636  | -4.18   | 94.2099 | InChI=1S/C12H7N3O/c16-12-10-9(3-4-13-10)15-5-1-2-8-7(6-14-8)11(12)15/h1-6,13H         |
| <b>o-177</b>  |  | 1.5068 | 86.1471  | -0.7589 | -1.32   | 94.5221 | InChI=1S/C12H7N3O/c16-12-7-6-14-10(7)8-2-1-5-15(8)9-3-4-13-11(9)12/h1-6,13H           |
| <b>x4-58</b>  |  | 3.9161 | 108.2528 | -0.251  | -6.9    | 94.6147 | InChI=1S/C12H7N3O/c16-12-8-3-1-2-7-4-5-13-10(7)9(8)11-14-6-15(11)12/h1-6,13H          |
| <b>I-37</b>   |  | 1.466  | 82.2125  | -0.3364 | -2.25   | 94.8563 | InChI=1S/C12H7N3O/c16-12-7-6-8-9(2-4-13-8)15-5-1-3-14-10(12)11(7)15/h1-6,13H          |
| <b>n-136</b>  |  | 1.3111 | 89.4414  | -0.6109 | -5.24   | 94.9039 | InChI=1S/C12H7N3O/c16-12-10-8(3-4-13-10)15-5-1-2-7-6-14-9(7)11(12)15/h1-6,13H         |
| <b>q-65</b>   |  | 3.8442 | 110.3677 | -0.2714 | -11.55  | 95.068  | InChI=1S/C12H7N3O/c16-12-14-10-6-8-9(15(10)12)3-1-2-7-4-5-13-11(7)8/h1-6,13H          |
| <b>F-11</b>   |  | 1.5166 | 84.39    | -0.3455 | -1.52   | 95.0843 | InChI=1S/C12H7N3O/c16-11-9-3-1-2-8-7-4-5-13-12(7)14-6-10(11)15(8)9/h1-6H, (H, 13, 14) |
| <b>o-120</b>  |  | 1.818  | 86.4643  | -0.7624 | -0.53   | 95.9977 | InChI=1S/C12H7N3O/c16-12-7-6-14-10(7)11-8(3-4-13-11)15-5-1-2-9(12)15/h1-6,13H         |
| <b>G-14</b>   |  | 2.2582 | 95.4504  | -0.2845 | -8.83   | 96.8994 | InChI=1S/C12H7N3O/c16-10-6-14-15-9(10)3-1-2-8-7-4-5-13-11(7)12(8)15/h1-6,13H          |
| <b>q-66</b>   |  | 3.9336 | 112.4572 | -0.2893 | -11.61  | 97.2231 | InChI=1S/C12H7N3O/c16-12-14-11-8-3-1-2-7-4-5-13-10(7)9(8)6-15(11)12/h1-6,13H          |

|                |                                                                                                                                        |        |          |         |         |          |                                                                                          |
|----------------|----------------------------------------------------------------------------------------------------------------------------------------|--------|----------|---------|---------|----------|------------------------------------------------------------------------------------------|
| <b>o-165</b>   | 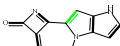                                                      | 1.5203 | 94.507   | -0.6811 | -5.17   | 97.6925  | InChI=1S/C12H7N3O/c16-12-7-2-1-5-15-9-3-4-13-8(9)6-10(15)11(7)14-12/h1-6,13H             |
| <b>A-5</b>     | <br>C <sub>22</sub> H <sub>9</sub> N <sub>3</sub> O   | 2.3393 | 96.6582  | -0.371  | -8.83   | 98.2585  | InChI=1S/C12H7N3O/c16-9-6-14-15-5-1-2-7-8-3-4-13-11(8)10(7)12(9)15/h1-6,13H              |
| <b>A-91</b>    | <br>C <sub>22</sub> H <sub>9</sub> N <sub>3</sub> O   | 1.7078 | 52.2594  | -0.3866 | 32.0397 | 99.635   | InChI=1S/C12H7N3O/c16-12-14-6-9-10-7(3-4-13-10)8-2-1-5-15(12)11(8)9/h1-6,13H             |
| <b>G-33</b>    | <br>C <sub>22</sub> H <sub>9</sub> N <sub>3</sub> O   | 2.3699 | 99.4261  | -0.3702 | -8.83   | 100.6877 | InChI=1S/C12H7N3O/c16-12-9-3-1-2-8-7-4-5-13-10(7)11(8)15(9)6-14-12/h1-6,13H              |
| <b>n-169</b>   | <br>C <sub>22</sub> H <sub>9</sub> N <sub>3</sub> O   | 2.2114 | 87.2917  | -0.1542 | 0.47    | 100.7267 | InChI=1S/C12H7N3O/c16-11-7-2-1-5-15-9-3-4-13-12(9)14-6-8(11)10(7)15/h1-6,13H             |
| <b>A-214</b>   | <br>C <sub>22</sub> H <sub>9</sub> N <sub>3</sub> O   | 2.3372 | 100.4604 | -0.4130 | -8.8300 | 102.1544 | InChI=1S/C12H7N3O/c16-12-11-9-7(8-3-4-13-10(8)9)2-1-5-15(11)6-14-12/h1-6,13H             |
| <b>x4-52</b>   | <br>C <sub>22</sub> H <sub>9</sub> N <sub>3</sub> O   | 3.959  | 109.8063 | -0.2959 | -9.89   | 102.3922 | InChI=1S/C12H7N3O/c16-12-8-3-1-2-7-4-5-13-11(7)10(8)9-6-14-15(9)12/h1-6,13H              |
| <b>A-31</b>    | <br>C <sub>22</sub> H <sub>9</sub> N <sub>3</sub> O   | 1.4793 | 50.2142  | -0.3625 | 36.679  | 102.7852 | InChI=1S/C12H7N3O/c16-9-6-14-11-10-7(3-4-13-10)8-2-1-5-15(9)12(8)11/h1-6,13H             |
| <b>n-192</b>   | <br>C <sub>22</sub> H <sub>9</sub> N <sub>3</sub> O   | 0.8701 | 107.2225 | -1.0434 | -6.17   | 102.8584 | InChI=1S/C12H7N3O/c16-12-7(6-14-12)10-8-2-1-5-15(8)9-3-4-13-11(9)10/h1-6,13H/b10-7+      |
| <b>x4-2</b>    | <br>C <sub>22</sub> H <sub>9</sub> N <sub>3</sub> O  | 2.3628 | 103.7329 | -0.4647 | -8.96   | 103.0488 | InChI=1S/C12H7N3O/c16-9-6-14-15-8-3-1-2-7-4-5-13-11(7)10(8)12(9)15/h1-6,13H              |
| <b>n11-43</b>  | <br>C <sub>22</sub> H <sub>9</sub> N <sub>3</sub> O | 1.3674 | 73.165   | -1.7878 | 31.5974 | 104.3785 | InChI=1S/C12H7N3O/c16-10-6-9-11-8(14-15(9)10)3-1-2-7-4-5-13-12(7)11/h1-6,13H             |
| <b>q11-37</b>  | <br>C <sub>22</sub> H <sub>9</sub> N <sub>3</sub> O | 1.3653 | 73.6564  | -1.7615 | 30.1092 | 104.7756 | InChI=1S/C12H7N3O/c16-10-6-9-8-3-1-2-7-4-5-13-11(7)12(8)14-15(9)10/h1-6,13H              |
| <b>q-6</b>     | <br>C <sub>22</sub> H <sub>9</sub> N <sub>3</sub> O | 2.3066 | 108.5089 | -0.3431 | -7.83   | 104.9584 | InChI=1S/C12H7N3O/c16-9-6-8-11-7(4-5-13-11)2-1-3-10-14-12(9)15(8)10/h1-6,13H/b2-1-,10-3- |
| <b>A-137</b>   | <br>C <sub>22</sub> H <sub>9</sub> N <sub>3</sub> O | 1.1253 | 108.9979 | -1.0393 | -6.17   | 105.2014 | InChI=1S/C12H7N3O/c16-12-8(6-14-12)11-10-7(3-4-13-10)9-2-1-5-15(9)11/h1-6,13H/b11-8-     |
| <b>A-53</b>    | <br>C <sub>22</sub> H <sub>9</sub> N <sub>3</sub> O | 1.0628 | 108.1536 | -1.0467 | -5.24   | 105.2761 | InChI=1S/C12H7N3O/c16-12-8(6-14-12)11-10-7(3-4-13-10)9-2-1-5-15(9)11/h1-6,13H/b11-8+     |
| <b>n-110</b>   | <br>C <sub>22</sub> H <sub>9</sub> N <sub>3</sub> O | 0.8206 | 105.7112 | -1.0454 | -3.18   | 105.3514 | InChI=1S/C12H7N3O/c16-9-6-14-12(9)10-7-2-1-5-15(7)8-3-4-13-11(8)10/h1-6,13H/b12-10-      |
| <b>H-56</b>    | <br>C <sub>22</sub> H <sub>9</sub> N <sub>3</sub> O | 2.9978 | 106.9247 | -0.1965 | -7.89   | 105.8668 | InChI=1S/C12H7N3O/c16-10-6-7-2-1-3-9-8-4-5-13-12(8)15(9)11(7)14-10/h1-6,13H              |
| <b>A-11</b>    | <br>C <sub>22</sub> H <sub>9</sub> N <sub>3</sub> O | 1.1011 | 107.603  | -1.0384 | -3.18   | 108.3786 | InChI=1S/C12H7N3O/c16-9-6-14-11(9)12-10-7(3-4-13-10)8-2-1-5-15(8)12/h1-6,13H/b12-11-     |
| <b>H11-108</b> | <br>C <sub>22</sub> H <sub>9</sub> N <sub>3</sub> O | 3.0223 | 107.6649 | -0.2252 | -6.83   | 108.4432 | InChI=1S/C12H7N3O/c16-11-6-10-8(14-11)2-1-3-9-7-4-5-13-12(7)15(9)10/h1-6,13H             |

|               |                                                                                     |        |          |         |          |          |                                                                                                              |
|---------------|-------------------------------------------------------------------------------------|--------|----------|---------|----------|----------|--------------------------------------------------------------------------------------------------------------|
| <b>q-60</b>   | 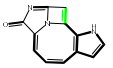   | 2.9096 | 106.833  | -0.5107 | -6.17    | 109.9364 | InChI=1S/C12H7N3O/c16-12-8-3-1-2-7-4-5-13-11(7)9-6-10(14-12)15(8)9/h1-6,13H/b2-1-,8-3-                       |
| <b>s11-60</b> |    | 2.7662 | 111.0263 | -0.3239 | -5.11    | 110.0418 | InChI=1S/C12H7N3O/c16-8-6-10-14-9-3-1-2-7-4-5-13-11(7)12(8)15(9)10/h1-6,13H/b3-1-,7-2-,12-11+                |
| <b>n-111</b>  |    | 2.5506 | 103.7403 | -0.2097 | -3.12    | 110.2534 | InChI=1S/C12H7N3O/c16-9-6-14-7-2-1-5-15-8-3-4-13-11(8)12(15)10(7)9/h1-6,13H                                  |
| <b>q11-39</b> |    | 2.689  | 111.2961 | -0.3554 | -5.11    | 110.33   | InChI=1S/C12H7N3O/c16-9-6-10-14-12-11-7(4-5-13-11)2-1-3-8(9)15(10)12/h1-6,13H/b2-1-,8-3-                     |
| <b>n-124</b>  |    | 2.5201 | 103.2878 | -0.1805 | -2.12    | 111.0444 | InChI=1S/C12H7N3O/c16-9-6-14-10-7(9)2-1-5-15-8-3-4-13-11(8)12(10)15/h1-6,13H                                 |
| <b>x4-64</b>  |    | 1.5564 | 67.7639  | -1.6827 | 47.1595  | 111.0755 | InChI=1S/C12H7N3O/c16-12-14-6-9-10-8(15(9)12)3-1-2-7-4-5-13-11(7)10/h1-6,13H                                 |
| <b>G1-40</b>  |    | 6.5832 | 107.3583 | -1.6272 | -7.7     | 112.324  | InChI=1S/C12H7N3O/c16-9-3-1-2-7-8-4-5-13-12(8)15-6-14-10(9)11(7)15/h1-6,13H                                  |
| <b>x4-48</b>  |    | 2.869  | 113.6808 | -0.4064 | -8.96    | 112.5396 | InChI=1S/C12H7N3O/c16-12-11-9-8(15(11)6-14-12)3-1-2-7-4-5-13-10(7)9/h1-6,13H                                 |
| <b>n-195</b>  |    | 2.6158 | 106.6636 | -0.2669 | -4.24    | 112.7755 | InChI=1S/C12H7N3O/c16-12-9-7(6-14-12)2-1-5-15-8-3-4-13-10(8)11(9)15/h1-6,13H                                 |
| <b>n-209</b>  |   | 2.6741 | 106.4948 | -0.2824 | -4.11    | 112.8499 | InChI=1S/C12H7N3O/c16-12-7-2-1-5-15-9-3-4-13-10(9)11(15)8(7)6-14-12/h1-6,13H                                 |
| <b>q-13</b>   |  | 2.2015 | 110.804  | -0.4099 | -6.17    | 112.8842 | InChI=1S/C12H7N3O/c16-11-8-3-1-2-7-4-5-13-10(7)9-6-14-12(11)15(8)9/h1-6,13H/b2-1-,8-3-                       |
| <b>C-69</b>   |  | 2.7279 | 128.6412 | -0.4780 | -10.5500 | 114.1289 | InChI=1S/C12H7N3O/c16-12-14-4-1-2-8-7-3-5-13-10(7)9-6-15(12)11(8)9/h1-6,13H/b2-1-,14-4+                      |
| <b>x4-60</b>  |  | 4.6873 | 124.2552 | 0.1194  | -8.83    | 114.4048 | InChI=1S/C12H7N3O/c16-12-8-3-1-2-7-4-5-13-9(7)10-11(8)15(12)6-14-10/h1-6,13H/b2-1-,3-1-,7-2-,8-3+,10-9-      |
| <b>x4-22</b>  |  | 4.6468 | 125.1605 | 0.0804  | -8.83    | 114.9034 | InChI=1S/C12H7N3O/c16-12-9-10-7(4-5-13-10)2-1-3-8-11(9)15(12)6-14-8/h1-6,13H/b2-1-,3-1-,7-2-,8-3+,10-9-      |
| <b>x4-50</b>  |  | 4.1308 | 125.0374 | -0.114  | -8.89    | 118.4166 | InChI=1S/C12H7N3O/c16-12-8-3-1-2-7-4-5-13-10(7)9-6-14-15(12)11(8)9/h1-6,13H/b2-1-,3-1-,7-2-,8-3+,10-9+       |
| <b>q11-5</b>  |  | 4.0247 | 117.4642 | -0.2412 | -7.23    | 121.1339 | InChI=1S/C12H7N3O/c16-12-9-6-8-3-1-2-7-4-5-13-10(7)11(14-12)15(8)9/h1-6,13H/b2-1-,8-3-                       |
| <b>s11-29</b> |  | 3.9762 | 118.0425 | -0.2667 | -6.17    | 121.948  | InChI=1S/C12H7N3O/c16-12-9-6-8-11-7(4-5-13-11)2-1-3-10(14-12)15(8)9/h1-6,13H/b3-1-,7-2-,11-8+                |
| <b>C-21</b>   |  | 3.0042 | 133.2379 | -0.2830 | -4.9700  | 122.1485 | InChI=1S/C12H7N3O/c16-12-9-6-13-4-1-2-7-8-3-5-14-11(8)15(12)10(7)9/h1-6,14H/b2-1-,4-1-,7-2-,9-6+,13-4-,13-6- |
| <b>H1-140</b> |  | 2.5244 | 119.6951 | -0.7109 | -6.9     | 122.8513 | InChI=1S/C12H7N3O/c16-11-3-1-2-8-7-4-5-13-12(7)9-6-10(14-11)15(8)9/h1-6,13H/b3-1-,8-2-,14-10-                |



|               |                                                                                                              |        |          |         |          |          |                                                                                                         |
|---------------|--------------------------------------------------------------------------------------------------------------|--------|----------|---------|----------|----------|---------------------------------------------------------------------------------------------------------|
| <b>H-47</b>   | 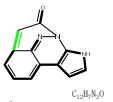<br><chem>C12H9N3O</chem>   | 1.6481 | 28.7932  | -0.4814 | 84.484   | 124.1106 | InChI=1S/C12H7N3O/c16-10-6-7-2-1-3-8-9-4-5-13-12(9)15(10)14-11(7)8/h1-6,13H                             |
| <b>F-18</b>   | <br><chem>C12H9N3O</chem>   | 2.0887 | 77.9619  | -1.1284 | 44.1027  | 124.3702 | InChI=1S/C12H7N3O/c16-12-10-6-15(12)14-11-9(4-5-13-11)7-2-1-3-8(7)10/h1-6H, 8H, 13, 14)/b9-7-           |
| <b>x4-20</b>  | <br><chem>C12H9N3O</chem>   | 1.1336 | 84.4457  | -1.3435 | 40.4106  | 124.7909 | InChI=1S/C12H7N3O/c16-12-9-10-7(4-5-13-10)2-1-3-8-6-14-15(12)11(8)9/h1-6,13H/b2-1-,3-1-,7-27,8-3-,10-9- |
| <b>A-1</b>    | <br><chem>C12H9N3O</chem>   | 0.9952 | 54.7149  | -0.038  | 56.4489  | 126.1308 | InChI=1S/C12H7N3O/c16-9-6-14-15-5-1-2-8-7-3-4-13-11(7)10(9)12(8)15/h1-6,13H                             |
| <b>A1-4</b>   | <br><chem>C12H9N3O</chem>   | 3.2129 | 138.9044 | -0.5068 | -7.83    | 127.0571 | InChI=1S/C12H7N3O/c16-12-9-10-7(3-5-14-10)8-2-1-4-13-6-15(12)11(8)9/h1-6,14H/b4-1-,8-2-,13-6-           |
| <b>n-134</b>  | <br><chem>C12H9N3O</chem>   | 0.8786 | 46.1517  | -0.1079 | 63.1328  | 127.2811 | InChI=1S/C12H7N3O/c16-12-9-8(3-4-13-9)15-5-1-2-7-6-14-10(12)11(7)15/h1-6,13H                            |
| <b>I-102</b>  | <br><chem>C12H9N3O</chem>   | 2.7308 | 121.5186 | -0.3719 | -5.04    | 127.7407 | InChI=1S/C12H7N3O/c16-12-8-6-7-10-9(2-4-13-10)15(11(7)8)5-1-3-14-12/h1-6,13H/b5-1-,14-3+                |
| <b>D-14</b>   | <br><chem>C12H9N3O</chem>   | 1.6916 | 122.2259 | -0.5548 | -4.2400  | 128.0222 | InChI=1S/C12H7N3O/c16-12-10-6-9-11-7(3-5-13-11)8(15(9)10)2-1-4-14-12/h1-6,13H/b2-1-,14-4-               |
| <b>B-105</b>  | <br><chem>C12H9N3O</chem>  | 2.8686 | 148.5867 | -0.5111 | -12.4799 | 129.7706 | InChI=1S/C12H7N3O/c16-12-14-10-6-9-7(2-1-5-15(10)12)8-3-4-13-11(8)9/h1-6,13H/b5-1-,7-2-,9-6+            |
| <b>q11-25</b> | <br><chem>C12H9N3O</chem> | 3.6296 | 124.0211 | -0.2448 | -3.45    | 129.9949 | InChI=1S/C12H7N3O/c16-11-8-3-1-2-7-4-5-13-10(7)12-14-6-9(11)15(8)12/h1-6,13H/b2-1-,8-3-                 |
| <b>s11-8</b>  | <br><chem>C12H9N3O</chem> | 4.068  | 68.8545  | -3.0109 | 46.9092  | 130.2112 | InChI=1S/C12H7N3O/c16-12-8-6-15(12)14-9-3-1-2-7-4-5-13-11(7)10(8)9/h1-6,13H                             |
| <b>n-133</b>  | <br><chem>C12H9N3O</chem> | 0.8942 | 47.9496  | -0.1088 | 66.8213  | 130.2552 | InChI=1S/C12H7N3O/c16-12-7-6-14-8-2-1-5-15(11(7)8)9-3-4-13-10(9)12/h1-6,13H                             |
| <b>s11-14</b> | <br><chem>C12H9N3O</chem> | 3.5949 | 124.9767 | -0.2794 | -3.45    | 130.4249 | InChI=1S/C12H7N3O/c16-12-8-6-14-9-3-1-2-7-4-5-13-10(7)11(12)15(8)9/h1-6,13H/b3-1-,7-2-,11-10+           |
| <b>A-202</b>  | <br><chem>C12H9N3O</chem> | 1.0737 | 56.3958  | -0.1513 | 58.2053  | 130.6125 | InChI=1S/C12H7N3O/c16-12-9-10-7(3-4-13-10)8-2-1-5-15(6-14-12)11(8)9/h1-6,13H                            |
| <b>q11-20</b> | <br><chem>C12H9N3O</chem> | 4.1591 | 69.0939  | -3.0512 | 45.9075  | 130.6856 | InChI=1S/C12H7N3O/c16-12-9-6-15(12)14-11-8(9)3-1-2-7-4-5-13-10(7)11/h1-6,13H                            |
| <b>H11-3</b>  | <br><chem>C12H9N3O</chem> | 2.9677 | 149.4584 | -0.5274 | -12.48   | 130.7805 | InChI=1S/C12H7N3O/c16-12-14-10-3-1-2-7-8-4-5-13-11(8)9(7)6-15(10)12/h1-6,13H/b3-1-,7-2-,9-6+            |
| <b>C-32</b>   | <br><chem>C12H9N3O</chem> | 1.9183 | 128.6555 | -0.4576 | -5.0400  | 130.9211 | InChI=1S/C12H7N3O/c16-12-9-6-15-10(9)7(2-1-4-14-12)8-3-5-13-11(8)15/h1-6,13H/b2-1-,14-4+                |
| <b>B-57</b>   | <br><chem>C12H9N3O</chem> | 2.6619 | 147.1573 | -0.5574 | -8.5800  | 132.5643 | InChI=1S/C12H7N3O/c16-10-6-9-14-12-7(2-1-5-15(9)10)8-3-4-13-11(8)12/h1-6,13H/b5-1-,7-2-,14-12+          |
| <b>B-241</b>  | <br><chem>C12H9N3O</chem> | 2.9513 | 44.9555  | -0.5605 | 77.5437  | 134.7103 | InChI=1S/C12H7N3O/c16-12-14-11-9-6-15(12)5-1-2-7(9)8-3-4-13-10(8)11/h1-6,13H                            |

|               |                                                                                     |        |          |         |          |          |                                                                                               |
|---------------|-------------------------------------------------------------------------------------|--------|----------|---------|----------|----------|-----------------------------------------------------------------------------------------------|
| <b>H-51</b>   |    | 2.6408 | 148.4282 | -0.5944 | -11.6099 | 135.6414 | InChI=1S/C12H7N3O/c16-10-6-7-2-1-3-8-9-4-5-13-11(9)12(8)14-15(7)10/h1-6,13H/b2-1-,8-3-,14-12+ |
| <b>C-23</b>   |    | 3.2976 | 61.9535  | -1.8659 | 65.6327  | 135.9833 | InChI=1S/C12H7N3O/c16-12-9-6-15(12)11-8(2-1-4-14-11)7-3-5-13-10(7)9/h1-6,13H                  |
| <b>G-54</b>   |    | 2.6609 | 154.4301 | -0.7693 | -8.83    | 136.2258 | InChI=1S/C12H7N3O/c16-12-10-7(8-4-5-13-11(8)10)2-1-3-9-14-6-15(9)12/h1-6,13H/b2-1-,9-3-       |
| <b>H-105</b>  |    | 2.9182 | 76.9794  | -1.4983 | 58.6159  | 137.5541 | InChI=1S/C12H7N3O/c16-12-10-6-7-2-1-3-8(7)9-4-5-13-11(9)15(12)14-10/h1-6,13H/b7-6-            |
| <b>C-20</b>   |    | 3.1491 | 65.7909  | -1.7024 | 66.4517  | 137.7385 | InChI=1S/C12H7N3O/c16-12-9-6-15(12)11-8(3-5-14-11)7-2-1-4-13-10(7)9/h1-6,14H                  |
| <b>C-45</b>   |    | 2.6844 | 152.0928 | -0.7452 | -8.5600  | 137.7756 | InChI=1S/C12H7N3O/c16-10-6-9-13-4-1-2-8-7-3-5-14-11(7)12(8)15(9)10/h1-6,14H/b2-1-,13-4-       |
| <b>C-40</b>   |    | 2.5410 | 151.4197 | -0.7800 | -11.4800 | 137.9523 | InChI=1S/C12H7N3O/c16-10-6-9-11-7(2-1-4-14-15(9)10)8-3-5-13-12(8)11/h1-6,13H/b2-1-,14-4-      |
| <b>G1-104</b> |    | 2.7991 | 156.4763 | -0.9461 | -9.49    | 138.6197 | InChI=1S/C12H7N3O/c16-9-3-1-2-7-8-4-5-13-11(8)10(7)12-14-6-15(9)12/h1-6,13H/b3-1-,7-2-,12-10+ |
| <b>o-159</b>  |   | 1.0971 | 77.5375  | -0.871  | 61.5742  | 138.9759 | InChI=1S/C12H7N3O/c16-12-7-2-1-5-15(12)9-3-4-13-11(9)10-8(7)6-14-10/h1-6,13H                  |
| <b>D-6</b>    |  | 2.2250 | 132.6663 | -0.4987 | -1.5200  | 140.1740 | InChI=1S/C12H7N3O/c16-12-9-6-13-4-1-2-8-7-3-5-14-10(7)11(12)15(8)9/h1-6,14H/b2-1-,9-6-,13-4-  |
| <b>H-24</b>   |  | 1.7686 | 84.6723  | -1.022  | 58.9871  | 140.4791 | InChI=1S/C12H7N3O/c16-12-7-2-1-3-9-8-4-5-13-10(8)14-11(9)15(12)6-7/h1-6,13H/b2-1-,9-3-        |
| <b>H-118</b>  |  | 2.3503 | 156.7711 | -0.8374 | -8.89    | 140.8419 | InChI=1S/C12H7N3O/c16-12-10-7(6-14-10)2-1-3-9-8-4-5-13-11(8)15(9)12/h1-6,13H/b2-1-,9-3-       |
| <b>H1-77</b>  |  | 4.7748 | 139.4743 | -1.8664 | -4.84    | 140.9399 | InChI=1S/C12H7N3O/c16-7-2-1-3-9-8-4-5-13-11(8)12-14-10(6-7)15(9)12/h1-6,13H/b2-1-,9-3-,10-6-  |
| <b>G-78</b>   |  | 4.4797 | 157.8209 | -1.964  | -13.2753 | 141.703  | InChI=1S/C12H7N3O/c16-12-14-6-15(12)9-3-1-2-7-8-4-5-13-11(8)10(7)9/h1-6,13H                   |
| <b>H11-11</b> |  | 1.994  | 30.9462  | -0.998  | 99.6897  | 142.0054 | InChI=1S/C12H7N3O/c16-12-14-10-3-1-2-7-8-4-5-13-11(8)15(12)6-9(7)10/h1-6,13H                  |
| <b>G-69</b>   |  | 4.379  | 155.7441 | -2.0578 | -13.2796 | 142.86   | InChI=1S/C12H7N3O/c16-10-6-14-15(10)9-3-1-2-7-8-4-5-13-12(8)11(7)9/h1-6,13H                   |
| <b>q-17</b>   |  | 4.2168 | 68.1477  | -3.2131 | 61.2493  | 142.9036 | InChI=1S/C12H7N3O/c16-12-9-6-8-10(15(12)14-9)3-1-2-7-4-5-13-11(7)8/h1-6,13H                   |
| <b>B-216</b>  |  | 2.4789 | 82.2492  | -1.1737 | 63.5064  | 143.2974 | InChI=1S/C12H7N3O/c16-12-9-6-15(12)5-1-2-7-8-3-4-13-11(8)14-10(7)9/h1-6,13H/b5-1-,7-2-        |
| <b>A2-62</b>  |  | 2.5644 | 86.1721  | -1.5585 | 43.4267  | 144.0817 | InChI=1S/C12H7N3O/c16-11-10-6-8-7(3-5-13-8)9-2-1-4-14-12(11)15(9)10/h1-6,13H                  |

|               |                                                                                     |         |          |          |          |          |                                                                                                              |
|---------------|-------------------------------------------------------------------------------------|---------|----------|----------|----------|----------|--------------------------------------------------------------------------------------------------------------|
| <b>q-19</b>   | 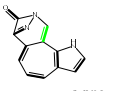   | 4.5819  | 69.6001  | -3.3022  | 60.8835  | 144.5361 | InChI=1S/C12H7N3O/c16-12-11-8-3-1-2-7-4-5-13-10(7)9(8)6-15(12)14-11/h1-6,13H                                 |
| <b>H11-56</b> |    | 2.3778  | 159.1064 | -0.8929  | -5.11    | 144.5552 | InChI=1S/C12H7N3O/c16-12-8-6-14-9(8)2-1-3-10-7-4-5-13-11(7)15(10)12/h1-6,13H/b2-1-,10-3-                     |
| <b>G-50</b>   |    | 2.6133  | 154.234  | -0.761   | -10.9499 | 144.8616 | InChI=1S/C12H7N3O/c16-12-10-8(9-4-5-13-11(9)10)3-1-2-7-6-14-15(7)12/h1-6,13H/b3-1-,7-2-                      |
| <b>o-156</b>  |    | 1.1137  | 78.1529  | -0.8374  | 67.818   | 145.7529 | InChI=1S/C12H7N3O/c16-12-7-2-1-5-15(12)9-3-4-13-11(9)8-6-14-10(7)8/h1-6,13H                                  |
| <b>B-137</b>  |    | 3.2711  | 84.5124  | -1.4540  | 58.3158  | 146.0074 | InChI=1S/C12H7N3O/c16-12-11-9-6-10-8(3-4-13-10)7(9)2-1-5-15(12)14-11/h1-6,13H/b5-1-,7-2-                     |
| <b>G1-66</b>  |    | 2.8169  | 156.3919 | -0.9602  | -12.48   | 146.442  | InChI=1S/C12H7N3O/c16-10-3-1-2-7-8-4-5-13-12(8)11(7)9-6-14-15(9)10/h1-6,13H/b3-1-,7-2-,11-9+                 |
| <b>H-94</b>   |    | 2.3892  | 32.7235  | -0.399   | 96.9511  | 147.7955 | InChI=1S/C12H7N3O/c16-12-11-9(4-5-13-11)8-3-1-2-7-6-15(12)14-10(7)8/h1-6,13H                                 |
| <b>H1-66</b>  |    | 3.2496  | 48.1462  | -1.9478  | 93.1193  | 148.1237 | InChI=1S/C12H7N3O/c16-11-3-1-2-9-7-4-5-13-12(7)8-6-10(14-8)15(9)11/h1-6,13H                                  |
| <b>H11-46</b> |    | 2.8633  | 29.846   | 29.846   | 107.7825 | 148.1649 | InChI=1S/C12H7N3O/c16-12-8-6-14-10-3-1-2-9(15(10)12)7-4-5-13-11(7)8/h1-6,13H                                 |
| <b>H11-14</b> |  | 2.7415  | 87.1542  | -1.4825  | 59.5647  | 149.0216 | InChI=1S/C12H7N3O/c16-12-9-3-1-2-8-7-4-5-13-10(7)6-11(8)15(12)14-9/h1-6,13H/b3-1-,8-2-                       |
| <b>p-7</b>    |  | 4.5254  | 91.5109  | -4.6569  | 54.6639  | 150.7167 | InChI=1S/C12H7N3O/c16-12-11-8-6-9-7(4-5-13-9)2-1-3-10(8)15(12)14-11/h1-6,13H/b2-1-,3-1-,7-2-,8-6+,9-6+,10-3+ |
| <b>p-9</b>    |  | 4.5194  | 91.6308  | -4.6656  | 54.6701  | 150.8581 | InChI=1S/C12H7N3O/c16-12-11-8-3-1-2-7-4-5-13-9(7)6-10(8)15(12)14-11/h1-6,13H/b2-1-,3-1-,7-2-,8-3+,9-6+,10-6+ |
| <b>I-20</b>   |  | 7.3872  | 59.0496  | -7.9195  | 71.0039  | 152.7793 | InChI=1S/C12H7N3O/c16-11-7-6-8(11)10(7)15-5-1-3-13-12-9(15)2-4-14-12/h1-6,14H                                |
| <b>H-37</b>   |  | 3.4887  | 155.3092 | -0.5153  | -7.89    | 152.992  | InChI=1S/C12H7N3O/c16-10-6-7-2-1-3-9-8-4-5-13-12(8)15(9)14-11(7)10/h1-6,13H/b2-1-,9-3-,14-11+                |
| <b>X22-18</b> |  | 7.0901  | 68.7746  | -7.7869  | 71.3871  | 153.5187 | InChI=1S/C12H7N3O/c16-12-11-8(3-5-14-11)13-4-1-2-7-9-6-10(7)15(9)12/h1-6,14H/b2-1-,13-4+                     |
| <b>r-10</b>   |  | 17.3588 | 123.7754 | -14.6496 | 16.8223  | 155.1197 | InChI=1S/C12H7N3O/c16-11-9-6-15(9)10(11)8-3-1-2-7-4-5-13-12(7)14-8/h1-6H, (H,13,14)/b10-8-                   |
| <b>o-155</b>  |  | 3.106   | 151.3302 | -0.5394  | -1.19    | 156.2356 | InChI=1S/C12H7N3O/c16-10-6-8-7(10)2-1-5-15-9-3-4-13-11(9)12(15)14-8/h1-6,13H/b5-1-,7-2+,14-12-               |
| <b>H1-67</b>  |  | 16.7809 | 126.3095 | -14.2019 | 19.1284  | 156.8769 | InChI=1S/C12H7N3O/c16-9-3-1-2-7(9)8-4-5-13-11(8)12-14-10-6-15(10)12/h1-6,13H                                 |
| <b>G-43</b>   |  | 3.3271  | 90.6008  | -1.2005  | 54.0222  | 157.0728 | InChI=1S/C12H7N3O/c16-12-11-8-2-1-3-10(11)15(12)14-6-9-7(8)4-5-13-9/h1-6,13H/b14-6+                          |

|                |                                                                                     |         |          |          |          |          |                                                                                                              |
|----------------|-------------------------------------------------------------------------------------|---------|----------|----------|----------|----------|--------------------------------------------------------------------------------------------------------------|
| <b>q11-10</b>  | 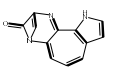   | 4.2671  | 65.5292  | -3.4197  | 76.7917  | 157.2902 | InChI=1S/C12H7N3O/c16-12-8-6-15(12)9-3-1-2-7-4-5-13-10(7)11(9)14-8/h1-6,13H                                  |
|                | $C_{12}H_7N_3O$                                                                     |         |          |          |          |          |                                                                                                              |
| <b>r-53</b>    |    | 2.7071  | 167.6187 | -1.7583  | -7.82    | 157.3238 | InChI=1S/C12H7N3O/c16-10-6-9-8-3-1-2-7-4-5-13-11(7)14-12(8)15(9)10/h1-6H,13,14                               |
|                | $C_{12}H_7N_3O$                                                                     |         |          |          |          |          |                                                                                                              |
| <b>A2-71</b>   |    | 3.2725  | 158.2689 | -0.6628  | -4.97    | 158.8646 | InChI=1S/C12H7N3O/c16-10-6-9-11(10)13-4-1-2-8-7-3-5-14-12(7)15(8)9/h1-6,14H/b4-1-,8-2-,13-11+                |
|                | $C_{12}H_7N_3O$                                                                     |         |          |          |          |          |                                                                                                              |
| <b>H-132</b>   |    | 2.798   | 31.1583  | -0.5604  | 115.6226 | 159.4333 | InChI=1S/C12H7N3O/c16-12-11-10-8(4-5-13-10)9-3-1-2-7(6-14-11)15(9)12/h1-6,13H                                |
|                | $C_{12}H_7N_3O$                                                                     |         |          |          |          |          |                                                                                                              |
| <b>C-50</b>    |    | 3.1302  | 94.0206  | -1.2338  | 52.9116  | 160.0377 | InChI=1S/C12H7N3O/c16-12-11-8-2-1-4-14-15(12)10(11)6-9-7(8)3-5-13-9/h1-6,13H/b2-1-,14-4-                     |
|                | $C_{12}H_7N_3O$                                                                     |         |          |          |          |          |                                                                                                              |
| <b>X22-46</b>  |    | 18.0557 | 125.7998 | -14.8688 | 19.4838  | 161.0879 | InChI=1S/C12H7N3O/c16-12-9-6-15(9)11(12)7-2-1-4-13-8-3-5-14-10(7)8/h1-6,14H/b11-7+                           |
|                | $C_{12}H_7N_3O$                                                                     |         |          |          |          |          |                                                                                                              |
| <b>H11-105</b> |    | 3.6496  | 160.6467 | -0.615   | -6.04    | 161.1676 | InChI=1S/C12H7N3O/c16-12-8-6-15-10(3-1-2-9(8)14-12)7-4-5-13-11(7)15/h1-6,13H/b2-1-,8-6-,10-3-                |
|                | $C_{12}H_7N_3O$                                                                     |         |          |          |          |          |                                                                                                              |
| <b>B-192</b>   |    | 1.5016  | 80.1299  | -1.0333  | 81.1686  | 161.6153 | InChI=1S/C12H7N3O/c16-12-10-9(6-14-10)7-2-1-5-15(12)11-8(7)3-4-13-11/h1-6,13H                                |
|                | $C_{12}H_7N_3O$                                                                     |         |          |          |          |          |                                                                                                              |
| <b>o-78</b>    |   | 7.8248  | 148.7515 | -1.804   | -4.97    | 162.0732 | InChI=1S/C12H7N3O/c16-10-6-7-8-2-1-5-15(8)9-3-4-13-12(9)14-11(7)10/h1-6,13H                                  |
|                | $C_{12}H_7N_3O$                                                                     |         |          |          |          |          |                                                                                                              |
| <b>o-166</b>   |  | 3.2452  | 158.1813 | -0.6059  | -5.11    | 162.2884 | InChI=1S/C12H7N3O/c16-12-7-2-1-5-15-9-3-4-13-11(9)10(15)6-8(7)14-12/h1-6,13H/b5-1-,7-2-,10-6-                |
|                | $C_{12}H_7N_3O$                                                                     |         |          |          |          |          |                                                                                                              |
| <b>G1-112</b>  |  | 13.9898 | 127.837  | -10.4114 | 18.1837  | 162.3633 | InChI=1S/C12H7N3O/c16-9-3-1-2-7(9)8-4-5-13-10(8)11-12-14-6-15(11)12/h1-6,13H                                 |
|                | $C_{12}H_7N_3O$                                                                     |         |          |          |          |          |                                                                                                              |
| <b>s12-29</b>  |  | 4.3499  | 87.0169  | -4.0771  | 66.4326  | 163.1137 | InChI=1S/C12H7N3O/c16-12-11-8-3-1-2-7-4-5-13-9(7)6-10(11)15(12)14-8/h1-6,13H/b3-1-,7-2-,9-6+                 |
|                | $C_{12}H_7N_3O$                                                                     |         |          |          |          |          |                                                                                                              |
| <b>A-30</b>    |  | 5.4966  | 50.2811  | -1.2698  | 93.0716  | 163.2547 | InChI=1S/C12H7N3O/c16-9-6-14-11-7-2-1-5-15(9)12(11)10-8(7)3-4-13-10/h1-6,13H                                 |
|                | $C_{12}H_7N_3O$                                                                     |         |          |          |          |          |                                                                                                              |
| <b>o-119</b>   |  | 7.531   | 89.0651  | -3.535   | 164.2332 | 164.2332 | InChI=1S/C12H7N3O/c16-12-7-2-1-5-15-9-3-4-13-11(9)10(14-15)8(12)6-7/h1-6,13H/b5-1-,7-2+                      |
|                | $C_{12}H_7N_3O$                                                                     |         |          |          |          |          |                                                                                                              |
| <b>C-9</b>     |  | 18.7375 | 127.6179 | -14.9205 | 19.2514  | 164.7115 | InChI=1S/C12H7N3O/c16-11-9-6-15(9)10(11)7-2-1-4-13-12-8(7)3-5-14-12/h1-6,14H/b10-7-                          |
|                | $C_{12}H_7N_3O$                                                                     |         |          |          |          |          |                                                                                                              |
| <b>G1-109</b>  |  | 17.6603 | 128.9041 | -11.5244 | 18.1827  | 165.9109 | InChI=1S/C12H7N3O/c16-10-3-1-2-7(10)8-4-5-13-11(8)15-9-6-14-12(9)15/h1-6,13H                                 |
|                | $C_{12}H_7N_3O$                                                                     |         |          |          |          |          |                                                                                                              |
| <b>p-29</b>    |  | 4.0771  | 106.9416 | -4.2777  | 58.1877  | 165.9211 | InChI=1S/C12H7N3O/c16-12-14-11-8-6-9-7(4-5-13-9)2-1-3-10(8)15(11)12/h1-6,13H/b2-1-,3-1-,7-2-,8-6-,9-6+,13-3+ |
|                | $C_{12}H_7N_3O$                                                                     |         |          |          |          |          |                                                                                                              |
| <b>i-64</b>    |  | 2.9907  | 157.3911 | -0.7352  | 1.67     | 165.968  | InChI=1S/C12H7N3O/c16-9-6-7-10(9)12-11-8(2-4-14-11)15(12)5-1-3-13-7/h1-6,14H/b5-1-,12-10+,13-3+              |
|                | $C_{12}H_7N_3O$                                                                     |         |          |          |          |          |                                                                                                              |
| <b>i-7</b>     |  | 2.9894  | 157.392  | -0.7353  | 1.67     | 165.968  | InChI=1S/C12H7N3O/c16-9-6-7-10(9)12-11-8(2-4-14-11)15(12)5-1-3-13-7/h1-6,14H/b5-1-,12-10+,13-3-              |
|                | $C_{12}H_7N_3O$                                                                     |         |          |          |          |          |                                                                                                              |

|               |                                                                                                              |         |          |          |          |          |                                                                                                                |
|---------------|--------------------------------------------------------------------------------------------------------------|---------|----------|----------|----------|----------|----------------------------------------------------------------------------------------------------------------|
| <b>p-30</b>   | <br><chem>C12H9N2O</chem>   | 4.075   | 106.9531 | -4.2805  | 58.1904  | 166.072  | InChI=1S/C12H7N3O/c16-12-14-11-8-3-1-2-7-4-5-13-9(7)6-10(8)15(11)12/h1-6,13H/b2-1-,3-1-,7-22,8-3-,9-6-,10-6+   |
| <b>p1-41</b>  | <br><chem>C12H9N2O</chem>   | 4.5469  | 176.7374 | -1.9815  | -7.83    | 166.2458 | InChI=1S/C12H7N3O/c16-9-3-1-2-7-4-5-13-10(7)11-8-6-14-12(8)15(9)11/h1-6,13H/b3-1-,7-2-,11-10+                  |
| <b>G1-98</b>  | <br><chem>C12H9N2O</chem>   | 3.4195  | 165.0788 | -0.6594  | -3.25    | 166.8311 | InChI=1S/C12H7N3O/c16-10-3-1-2-9-7-4-5-13-11(7)15(9)12-8(10)6-14-12/h1-6,13H/b3-1-,9-2-                        |
| <b>I-18</b>   | <br><chem>C12H9N2O</chem>   | 4.1692  | 108.2632 | -4.408   | 59.6754  | 167.5354 | InChI=1S/C12H7N3O/c16-10-6-9-7-2-1-4-13-8-3-5-14-11(8)12(7)15(9)10/h1-6,14H/b2-1-,4-1-,7-2-,12-11-,13-4-,13-8+ |
| <b>G1-62</b>  | <br><chem>C12H9N2O</chem>   | 3.5077  | 164.5886 | -0.6669  | -5.97    | 167.7829 | InChI=1S/C12H7N3O/c16-10-3-1-2-8-7-4-5-13-12(7)15(8)9-6-14-11(9)10/h1-6,13H/b3-1-,8-2-                         |
| <b>H11-7</b>  | <br><chem>C12H9N2O</chem>   | 3.0631  | 37.9922  | -0.2656  | 114.6803 | 168.173  | InChI=1S/C12H7N3O/c16-12-14-9-3-1-2-7-6-10(9)15(12)11-8(7)4-5-13-11/h1-6,13H                                   |
| <b>q11-27</b> | <br><chem>C12H9N2O</chem>   | 12.137  | 127.5572 | -11.2718 | 17.3642  | 168.4159 | InChI=1S/C12H7N3O/c16-12-8-3-1-2-7-4-5-13-10(7)11(8)14-15-6-9(12)15/h1-6,13H                                   |
| <b>B-16</b>   | <br><chem>C12H9N2O</chem>   | 3.2126  | 50.0954  | -1.0409  | 106.4528 | 168.4822 | InChI=1S/C12H7N3O/c16-10-6-9-11-8(3-4-13-11)7-2-1-5-15(10)14-12(7)9/h1-6,13H                                   |
| <b>H-152</b>  | <br><chem>C12H9N2O</chem>   | 2.5804  | 84.0007  | -1.5158  | 76.6733  | 168.9105 | InChI=1S/C12H7N3O/c16-12-14-10-8-3-1-2-7(6-8)9-4-5-13-11(9)15(10)12/h1-6,13H                                   |
| <b>G-79</b>   | <br><chem>C12H9N2O</chem>  | 3.8974  | 33.0044  | -1.4275  | 117.0167 | 169.0122 | InChI=1S/C12H7N3O/c16-12-14-6-9-7-2-1-3-10(9)15(12)11-8(7)4-5-13-11/h1-6,13H                                   |
| <b>G1-106</b> | <br><chem>C12H9N2O</chem> | 14.3817 | 126.8967 | -10.5145 | 16.9573  | 169.0291 | InChI=1S/C12H7N3O/c16-9-3-1-2-8(7-4-5-13-10(7)9)11-12-14-6-15(11)12/h1-6,13H                                   |
| <b>o-252</b>  | <br><chem>C12H9N2O</chem> | 4.6276  | 65.719   | -1.9825  | 88.4398  | 169.2713 | InChI=1S/C12H7N3O/c16-12-14-10-7-2-1-5-15(12)9-3-4-13-11(9)8(10)6-7/h1-6,13H/b5-1-,7-2-                        |
| <b>F-72</b>   | <br><chem>C12H9N2O</chem> | 3.1261  | 53.3931  | -2.1278  | 109.0562 | 169.8379 | InChI=1S/C12H7N3O/c16-12-14-11-9(4-5-13-11)8-3-1-2-7-6-10(8)15(7)12/h1-6H, (H,13,14,16)                        |
| <b>H11-1</b>  | <br><chem>C12H9N2O</chem> | 3.3604  | 106.0349 | -0.6828  | 63.3373  | 170.2006 | InChI=1S/C12H7N3O/c16-12-14-10-3-1-2-7-6-9(15(10)12)11-8(7)4-5-13-11/h1-6,13H/b3-1-,7-2+                       |
| <b>x6-37</b>  | <br><chem>C12H9N2O</chem> | 7.5678  | 63.9245  | -7.3201  | 87.0127  | 170.6488 | InChI=1S/C12H7N3O/c16-10-3-1-2-7-4-5-13-9(7)6-8-11-14-12(8)15(10)11/h1-6,13H/b3-1-,7-2-,9-6+                   |
| <b>G-20</b>   | <br><chem>C12H9N2O</chem> | 3.3819  | 31.5376  | -1.0286  | 122.7399 | 170.708  | InChI=1S/C12H7N3O/c16-12-12-9-3-1-2-7-8-4-5-13-11(8)15(12)6-14-10(7)9/h1-6,13H                                 |
| <b>q1-48</b>  | <br><chem>C12H9N2O</chem> | 4.7885  | 58.1365  | -4.4497  | 107.7514 | 171.0032 | InChI=1S/C12H7N3O/c16-12-10-7(4-5-13-10)2-1-3-8-9-6-14-11(8)15(9)12/h1-6,13H/b2-1-,8-3-                        |
| <b>q1-49</b>  | <br><chem>C12H9N2O</chem> | 4.7889  | 58.1364  | -4.4501  | 107.7516 | 171.0032 | InChI=1S/C12H7N3O/c16-12-10-7(4-5-13-10)2-1-3-8-9-6-15(9)11(8)14-12/h1-6,13H/b2-1-,8-3-,14-11+                 |
| <b>F-51</b>   | <br><chem>C12H9N2O</chem> | 4.5821  | 67.5758  | -1.5187  | 93.8878  | 171.0266 | InChI=1S/C12H7N3O/c16-12-8-2-1-3-9-7-4-5-13-11(7)14-6-10(8)15(9)12/h1-6H, (H,13,14)                            |

|               |  |         |          |          |          |          |                                                                                                              |
|---------------|--|---------|----------|----------|----------|----------|--------------------------------------------------------------------------------------------------------------|
| <b>H-53</b>   |  | 2.5347  | 102.4615 | -0.46    | 68.7926  | 171.1681 | InChI=1S/C12H7N3O/c16-10-6-7-2-1-3-9-8-4-5-13-11(8)12(14-9)15(7)10/h1-6,13H/b2-1-,9-3-                       |
| <b>k-42</b>   |  | 12.1389 | 131.6509 | -12.0904 | 33.2123  | 171.6974 | InChI=1S/C12H7N3O/c16-12-8-6-7(8)11-10-9(2-4-14-10)13-3-1-5-15(11)12/h1-6,14H/b5-1-,13-3+                    |
| <b>B-43</b>   |  | 2.4270  | 26.1226  | -0.6467  | 134.6101 | 172.0471 | InChI=1S/C12H7N3O/c16-10-6-9-11-7(3-4-13-11)8-2-1-5-15(10)12(8)14-9/h1-6,13H                                 |
| <b>r-16</b>   |  | 6.1125  | 176.8878 | -2.1651  | -9.8995  | 172.1875 | InChI=1S/C12H7N3O/c16-12-9-6-8-3-1-2-7-4-5-13-11(7)14-15(12)10(8)9/h1-6H, (H,13,14)/b3-1-,7-2-               |
| <b>A2-12</b>  |  | 4.6544  | 67.2507  | -1.6348  | 94.9893  | 172.7055 | InChI=1S/C12H7N3O/c16-12-8-6-9-7(3-5-13-9)10-2-1-4-14-11(8)15(10)12/h1-6,13H                                 |
| <b>G-44</b>   |  | 3.3196  | 93.4663  | -1.0526  | 72.9197  | 173.1638 | InChI=1S/C12H7N3O/c16-12-10-7-2-1-3-9(10)15(12)6-14-11-8(7)4-5-13-11/h1-6,13H/b4-6+                          |
| <b>B-42</b>   |  | 1.9532  | 32.2233  | -1.1398  | 125.9839 | 173.3647 | InChI=1S/C12H7N3O/c16-10-6-8-11-7(3-4-13-11)9-2-1-5-15(9)12(10)14-8/h1-6,13H                                 |
| <b>F-68</b>   |  | 3.8858  | 90.6198  | -0.8942  | 70.9244  | 173.4242 | InChI=1S/C12H7N3O/c16-12-14-11-8(4-5-13-11)7-2-1-3-10-9(7)6-15(10)12/h1-6H, (H,13,14,16)/b8-7-               |
| <b>I-89</b>   |  | 15.1994 | 123.8905 | -14.1899 | 31.8556  | 173.8152 | InChI=1S/C12H7N3O/c16-11-8-6-7(8)10(11)15-5-1-3-13-12-9(15)2-4-14-12/h1-6,14H                                |
| <b>o-89</b>   |  | 1.6097  | 81.7025  | -1.1105  | 88.8545  | 173.8596 | InChI=1S/C12H7N3O/c16-12-11-8(6-14-11)7-2-1-5-15(12)9-3-4-13-10(7)9/h1-6,13H                                 |
| <b>H1-9</b>   |  | 3.8199  | 93.7507  | -0.8348  | 63.9008  | 174.5586 | InChI=1S/C12H7N3O/c16-11-3-1-2-8-7-4-5-13-9(7)6-10-12(8)14-15(10)11/h1-6,13H/b3-1-,8-2-                      |
| <b>s11-5</b>  |  | 5.5537  | 71.9083  | -2.7465  | 88.19    | 174.6283 | InChI=1S/C12H7N3O/c16-12-8-6-14-9-3-1-2-7-4-5-13-10(7)11(8)15(9)12/h1-6,13H/b2-1-,3-1-,7-2-,9-3-,11-10+      |
| <b>r-54</b>   |  | 4.3989  | 108.2    | -4.4905  | 66.513   | 175.1858 | InChI=1S/C12H7N3O/c16-10-6-9-11-8(15(9)10)3-1-2-7-4-5-13-12(7)14-11/h1-6H, (H,13,14)                         |
| <b>H-162</b>  |  | 3.9607  | 29.7555  | -1.1196  | 129.6123 | 175.4641 | InChI=1S/C12H7N3O/c16-12-14-9-6-7-2-1-3-10(15(7)12)8-4-5-13-11(8)9/h1-6,13H                                  |
| <b>s12-32</b> |  | 4.5328  | 110.6982 | -4.4613  | 57.2459  | 176.0986 | InChI=1S/C12H7N3O/c16-12-8-6-10-7(4-5-13-10)2-1-3-9-11(8)15(12)14-9/h1-6,13H/b3-1-,7-2-,10-6+                |
| <b>H11-51</b> |  | 4.7254  | 125.1139 | -1.5559  | 39.5355  | 176.3135 | InChI=1S/C12H7N3O/c16-12-10-6-15(12)11-8(4-5-13-11)7-2-1-3-9(7)14-10/h1-6,13H/b4-9-                          |
| <b>p1-36</b>  |  | 6.1545  | 75.2028  | -6.9142  | 70.9122  | 176.6051 | InChI=1S/C12H7N3O/c16-9-3-1-2-7-4-5-13-10(7)11-8-6-15(11)12(8)14-9/h1-6,13H/b3-1-,7-2-,11-10-,14-12+         |
| <b>q11-4</b>  |  | 25.5681 | 141.1312 | -17.3474 | 10.1934  | 176.7601 | InChI=1S/C12H7N3O/c16-12-9-6-15(9)8-3-1-2-7-4-5-13-10(7)11(8)14-12/h1-6,13H                                  |
| <b>p-10</b>   |  | 6.1297  | 87.3151  | -3.7965  | 82.3765  | 176.7952 | InChI=1S/C12H7N3O/c16-12-11-9-3-1-2-7-4-5-13-8(7)6-10(14-11)15(9)12/h1-6,13H/b2-1-,3-1-,7-2-,8-6+,9-3-,10-6- |

|               |                                                                                     |          |           |           |           |           |                                                                                                                |
|---------------|-------------------------------------------------------------------------------------|----------|-----------|-----------|-----------|-----------|----------------------------------------------------------------------------------------------------------------|
| <b>F-9</b>    | 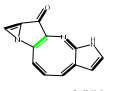   | 19, 2943 | 146, 6623 | -14, 997  | 13, 7703  | 177, 83   | InChI=1S/C12H7N3O/c16-11-9-6-15(9)8-3-1-2-7-4-5-13-12(7)14-10(8)11/h1-6H, (H, 13, 14)                          |
| <b>F-30</b>   |    | 4, 8708  | 125, 1208 | -1, 5796  | 39, 6364  | 177, 8631 | InChI=1S/C12H7N3O/c16-12-9-6-15(12)10-3-1-2-7(10)8-4-5-13-11(8)14-9/h1-6H, (H, 13, 14)/b8-7-                   |
| <b>q11-18</b> |    | 5, 7529  | 74, 0277  | -2, 6645  | 89, 6845  | 178, 7669 | InChI=1S/C12H7N3O/c16-12-8-6-14-11-10-7(4-5-13-10)2-1-3-9(8)15(11)12/h1-6, 13H/b2-1-, 3-1-, 7-2-, 9-3-, 11-10+ |
| <b>H1-84</b>  |    | 19, 8453 | 127, 6083 | -15, 565  | 32, 3122  | 178, 7784 | InChI=1S/C12H7N3O/c16-11-3-1-2-10-7-4-5-13-12(7)8-6-9(8)14-15(10)11/h1-6, 13H                                  |
| <b>q-42</b>   |    | 5, 1943  | 72, 2889  | -3, 0381  | 88, 3295  | 178, 9836 | InChI=1S/C12H7N3O/c16-10-6-8-11-7(4-5-13-11)2-1-3-9-12(8)14-15(9)10/h1-6, 13H/b2-1-, 9-3+                      |
| <b>H1-27</b>  |    | 3, 625   | 54, 8508  | -1, 9648  | 117, 2584 | 179, 0005 | InChI=1S/C12H7N3O/c16-11-3-1-2-8-7-4-5-13-9(7)6-10-14-12(8)15(10)11/h1-6, 13H                                  |
| <b>B-180</b>  |    | 2, 3329  | 31, 1598  | -1, 4478  | 130, 8328 | 179, 1354 | InChI=1S/C12H7N3O/c16-11-8-6-14-12(11)15-5-1-2-9(15)7-3-4-13-10(7)8/h1-6, 13H                                  |
| <b>D-8</b>    |    | 24, 7489 | 122, 6888 | -16, 4964 | 38, 7076  | 179, 1979 | InChI=1S/C12H7N3O/c16-12-9-6-8(9)11-7(3-5-13-11)10-2-1-4-14-15(10)12/h1-6, 13H                                 |
| <b>s12-48</b> |   | 10, 3475 | 135, 2974 | -6, 1342  | 16, 8237  | 179, 6105 | InChI=1S/C12H7N3O/c16-12-11-10-8(14-12)3-1-2-7-4-5-13-9(7)6-15(10)11/h1-6, 13H/b3-1-, 7-2-, 9-6+               |
| <b>x9-43</b>  |  | 9, 7586  | 139, 6265 | -7, 2259  | 16, 0495  | 179, 882  | InChI=1S/C12H7N3O/c16-12-9-7(4-5-13-9)2-1-3-8-10-11(12)15(10)6-14-8/h1-6, 13H/b2-1-, 8-3+                      |
| <b>X23-8</b>  |  | 4, 4837  | 184, 9719 | -1, 8971  | -4, 04    | 179, 9794 | InChI=1S/C12H7N3O/c16-12-9-10-8(3-5-14-10)13-4-1-2-7-6-15(12)11(7)9/h1-6, 14H/b2-1-, 13-4-                     |
| <b>X23-17</b> |  | 4, 4829  | 184, 9713 | -1, 8969  | -4, 04    | 179, 9795 | InChI=1S/C12H7N3O/c16-12-9-10-8(3-5-14-10)13-4-1-2-7-6-15(12)11(7)9/h1-6, 14H/b2-1-, 13-4+                     |
| <b>B-119</b>  |  | 2, 0791  | 24, 3021  | -0, 8850  | 143, 6051 | 180, 0002 | InChI=1S/C12H7N3O/c16-12-14-9-6-10-7(2-1-5-15(10)12)8-3-4-13-11(8)9/h1-6, 13H                                  |
| <b>G-71</b>   |  | 3, 5874  | 32, 3843  | -1, 3496  | 130, 1585 | 180, 2907 | InChI=1S/C12H7N3O/c16-10-6-14-11-7-2-1-3-9(11)15(10)12-8(7)4-5-13-12/h1-6, 13H                                 |
| <b>B-77</b>   |  | 6, 5449  | 76, 0963  | -2, 2443  | 85, 0898  | 180, 3398 | InChI=1S/C12H7N3O/c16-12-9-6-8(14-9)11-7(3-4-13-11)10-2-1-5-15(10)12/h1-6, 13H                                 |
| <b>F-21</b>   |  | 5, 0303  | 76, 9726  | -1, 3805  | 95, 4579  | 180, 3607 | InChI=1S/C12H7N3O/c16-12-8-6-14-11-7(4-5-13-11)9-2-1-3-10(8)15(9)12/h1-6H, (H, 13, 14)                         |
| <b>X22-33</b> |  | 4, 4933  | 184, 9202 | -1, 8946  | -2, 98    | 180, 5989 | InChI=1S/C12H7N3O/c16-12-7-2-1-4-13-9-3-5-14-10(9)8-6-15(12)11(7)8/h1-6, 14H/b2-1-, 13-4+                      |
| <b>B-198</b>  |  | 2, 1032  | 86, 7524  | -1, 0825  | 87, 1370  | 180, 6371 | InChI=1S/C12H7N3O/c16-12-11-8(3-4-13-11)7-2-1-5-15(12)9-6-14-10(7)9/h1-6, 13H                                  |
| <b>H11-69</b> |  | 2, 4242  | 89, 6617  | -0, 84    | 82, 6258  | 180, 6661 | InChI=1S/C12H7N3O/c16-11-6-10-9-3-1-2-8(14-9)7-4-5-13-12(7)15(10)11/h1-6, 13H                                  |

|               |                                                                                     |         |          |          |          |          |                                                                                                 |
|---------------|-------------------------------------------------------------------------------------|---------|----------|----------|----------|----------|-------------------------------------------------------------------------------------------------|
| <b>H1-73</b>  | 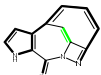   | 3.2291  | 82.5713  | -0.6564  | 81.7596  | 180.8385 | InChI=1S/C12H7N3O/c16-12-11-8(4-5-13-11)7-2-1-3-9-10(6-7)15(12)14-9/h1-6,13H                    |
|               | $C_{12}H_7N_3O$                                                                     |         |          |          |          |          |                                                                                                 |
| <b>k1-23</b>  |    | 12.6307 | 124.8361 | -10.6346 | 32.2657  | 181.0101 | InChI=1S/C12H7N3O/c16-12-9-7-6-15(11(7)9)5-1-3-13-8-2-4-14-10(8)12/h1-6,14H/b5-1-,13-3+         |
|               | $C_{12}H_7N_3O$                                                                     |         |          |          |          |          |                                                                                                 |
| <b>H1-135</b> |    | 3.1397  | 54.6767  | -1.8121  | 117.6126 | 181.9984 | InChI=1S/C12H7N3O/c16-11-3-1-2-7-8-4-5-13-12(8)14-10-6-9(7)15(10)11/h1-6,13H                    |
|               | $C_{12}H_7N_3O$                                                                     |         |          |          |          |          |                                                                                                 |
| <b>k-14</b>   |    | 4.6813  | 59.9744  | -5.7698  | 111.0014 | 182.4278 | InChI=1S/C12H7N3O/c16-12-7-6-9(12)15-5-1-3-13-8-2-4-14-10(8)11(7)15/h1-6,14H/b5-1-,13-3+        |
|               | $C_{12}H_7N_3O$                                                                     |         |          |          |          |          |                                                                                                 |
| <b>B-129</b>  |    | 2.7518  | 47.0601  | -0.3761  | 117.2884 | 182.5027 | InChI=1S/C12H7N3O/c16-12-9-6-10-7(3-4-13-10)8-2-1-5-15(12)14-11(8)9/h1-6,13H                    |
|               | $C_{12}H_7N_3O$                                                                     |         |          |          |          |          |                                                                                                 |
| <b>o-217</b>  |    | 2.4967  | 32.8873  | -1.4343  | 131.4104 | 182.6763 | InChI=1S/C12H7N3O/c16-12-7-6-8(14-12)9-2-1-5-15(9)10-3-4-13-11(7)10/h1-6,13H                    |
|               | $C_{12}H_7N_3O$                                                                     |         |          |          |          |          |                                                                                                 |
| <b>o-222</b>  |    | 2.4949  | 32.8575  | -1.4083  | 131.8529 | 182.7319 | InChI=1S/C12H7N3O/c16-12-7-6-8(14-12)11-10(3-4-13-11)15-5-1-2-9(7)15/h1-6,13H                   |
|               | $C_{12}H_7N_3O$                                                                     |         |          |          |          |          |                                                                                                 |
| <b>H1-57</b>  |    | 4.2946  | 103.1244 | -0.6537  | 61.08    | 183.0038 | InChI=1S/C12H7N3O/c16-10-3-1-2-7-6-9-12(14-15(9)10)11-8(7)4-5-13-11/h1-6,13H/b3-1-,7-2+         |
|               | $C_{12}H_7N_3O$                                                                     |         |          |          |          |          |                                                                                                 |
| <b>D-24</b>   |   | 16.2347 | 140.6010 | -13.0611 | 28.5334  | 183.1472 | InChI=1S/C12H7N3O/c16-12-14-4-1-2-9-7-3-5-13-11(7)8-6-10(8)15(9)12/h1-6,13H                     |
|               | $C_{12}H_7N_3O$                                                                     |         |          |          |          |          |                                                                                                 |
| <b>H1-102</b> |  | 4.5341  | 76.2478  | -2.3341  | 92.3412  | 183.1818 | InChI=1S/C12H7N3O/c16-10-3-1-2-7-8-4-5-13-11(8)14-12-9(7)6-15(10)12/h1-6,13H/b3-1-,7-2-         |
|               | $C_{12}H_7N_3O$                                                                     |         |          |          |          |          |                                                                                                 |
| <b>H-76</b>   |  | 4.9167  | 69.1839  | -1.8255  | 106.5246 | 183.285  | InChI=1S/C12H7N3O/c16-12-9-3-1-2-7-6-10(15(7)12)14-11-8(9)4-5-13-11/h1-6H, (H,13,14)            |
|               | $C_{12}H_7N_3O$                                                                     |         |          |          |          |          |                                                                                                 |
| <b>H-101</b>  |  | 5.8232  | 39.8649  | -0.801   | 117.0571 | 183.3269 | InChI=1S/C12H7N3O/c16-12-10-8(4-5-13-10)9-3-1-2-7-6-15(12)11(9)14-7/h1-6,13H                    |
|               | $C_{12}H_7N_3O$                                                                     |         |          |          |          |          |                                                                                                 |
| <b>D-4</b>    |  | 3.5715  | 49.9432  | -2.3423  | 110.6633 | 183.3468 | InChI=1S/C12H7N3O/c16-12-8-6-10(12)15-9(2-1-4-14-15)7-3-5-13-11(7)8/h1-6,13H                    |
|               | $C_{12}H_7N_3O$                                                                     |         |          |          |          |          |                                                                                                 |
| <b>s11-17</b> |  | 9.6254  | 141.8565 | -7.1825  | 15.1173  | 183.8615 | InChI=1S/C12H7N3O/c16-12-9-6-15(9)14-8-3-1-2-7-4-5-13-11(7)10(8)12/h1-6,13H                     |
|               | $C_{12}H_7N_3O$                                                                     |         |          |          |          |          |                                                                                                 |
| <b>B-87</b>   |  | 2.4120  | 32.0922  | -1.4678  | 133.3005 | 184.0518 | InChI=1S/C12H7N3O/c16-12-10-6-8(14-12)11-7(3-4-13-11)9-2-1-5-15(9)10/h1-6,13H                   |
|               | $C_{12}H_7N_3O$                                                                     |         |          |          |          |          |                                                                                                 |
| <b>B-39</b>   |  | 1.9130  | 94.1783  | -0.5022  | 88.0528  | 184.2918 | InChI=1S/C12H7N3O/c16-10-6-9-12-11-7(3-4-13-11)8(14-12)2-1-5-15(9)10/h1-6,13H/b5-1-,8-2-        |
|               | $C_{12}H_7N_3O$                                                                     |         |          |          |          |          |                                                                                                 |
| <b>r-46</b>   |  | 21.4879 | 155.8057 | -15.9717 | 16.6769  | 184.3004 | InChI=1S/C12H7N3O/c16-12-10(9-6-15(9)12)8-3-1-2-7-4-5-13-11(7)14-8/h1-6H, (H,13,14)/b10-8+      |
|               | $C_{12}H_7N_3O$                                                                     |         |          |          |          |          |                                                                                                 |
| <b>B-64</b>   |  | 2.7833  | 68.1035  | -1.4902  | 101.9827 | 185.4752 | InChI=1S/C12H7N3O/c16-12-8-6-9(12)14-15-5-1-2-10(15)7-3-4-13-11(7)8/h1-6,13H/b14-9+             |
|               | $C_{12}H_7N_3O$                                                                     |         |          |          |          |          |                                                                                                 |
| <b>r1-28</b>  |  | 8.1016  | 65.9566  | -7.9122  | 98.8439  | 185.7817 | InChI=1S/C12H7N3O/c16-10-3-1-2-7-4-5-13-12(7)14-11-8-6-9(11)15(8)10/h1-6H, (H,13,14)/b3-1-,7-2- |
|               | $C_{12}H_7N_3O$                                                                     |         |          |          |          |          |                                                                                                 |



|                |                                                                                     |         |          |          |          |          |                                                                                                                 |
|----------------|-------------------------------------------------------------------------------------|---------|----------|----------|----------|----------|-----------------------------------------------------------------------------------------------------------------|
| <b>p1-23</b>   |    | 7.0286  | 88.2227  | -6.2578  | 92.9829  | 185.8994 | InChI=1S/C12H7N3O/c16-9-3-1-2-7-4-5-13-10(7)12-11-8(6-14-11)15(9)12/h1-6,13H/b3-1-,7-2-,12-10+                  |
| <b>r-51</b>    |    | 18.071  | 152.1334 | -14.4942 | 13.1802  | 185.9392 | InChI=1S/C12H7N3O/c16-12-10-8(15-6-9(10)15)3-1-2-7-4-5-13-11(7)14-12/h1-6H,(H,13,14,16)                         |
| <b>H11-81</b>  |    | 2.3408  | 78.2946  | -1.2903  | 100.4996 | 186.2417 | InChI=1S/C12H7N3O/c16-12-11-8(4-5-13-11)9-3-1-2-7-6-10(14-7)15(9)12/h1-6,13H/b2-1-,9-3-                         |
| <b>H1-55</b>   |    | 18.4    | 149.9367 | -14.4214 | 23.1417  | 186.7559 | InChI=1S/C12H7N3O/c16-10-3-1-2-7(10)8-4-5-13-11(8)12-9-6-15(9)14-12/h1-6,13H                                    |
| <b>H11-8</b>   |    | 4.6756  | 52.9127  | -1.0674  | 108.569  | 186.8569 | InChI=1S/C12H7N3O/c16-12-14-7-2-1-3-8-9-4-5-13-11(9)15(12)(10)8(6-7)h1-6,13H                                    |
| <b>p-28</b>    |    | 4.7141  | 82.2546  | -3.9506  | 100.0256 | 186.9254 | InChI=1S/C12H7N3O/c16-12-14-11-9-3-1-2-7-4-5-13-8(7)6-10(11)15(9)12/h1-6,13H/b2-1-,9-3-,10-6-                   |
| <b>q1-9</b>    |    | 7.1364  | 88.7328  | -6.1786  | 91.9165  | 187.7356 | InChI=1S/C12H7N3O/c16-12-10-7(4-5-13-10)2-1-3-8-11-9(6-14-11)15(8)12/h1-6,13H/b2-1-,8-3-                        |
| <b>G1-87</b>   |    | 5.2311  | 66.2549  | -0.8107  | 104.058  | 187.8009 | InChI=1S/C12H7N3O/c16-9-3-1-2-7-8-4-5-13-10(8)12-11(7)14-6-15(9)12/h1-6,13H/b3-1-,7-2-                          |
| <b>H11-123</b> |   | 6.3211  | 64.9993  | 0.3543   | 90.322   | 187.8322 | InChI=1S/C12H7N3O/c16-11-6-10-12-7(4-5-13-12)9-3-1-2-8(11)14-15(9)10/h1-6,13H                                   |
| <b>G-42</b>    |  | 2.5515  | 90.9628  | -0.8953  | 79.2273  | 187.9293 | InChI=1S/C12H7N3O/c16-12-10-7-2-1-3-8(10)9-4-5-13-11(9)15(12)14-6-7/h1-6,13H                                    |
| <b>q1-54</b>   |  | 5.2484  | 53.8557  | -4.6202  | 126.9986 | 187.9864 | InChI=1S/C12H7N3O/c16-12-10-7(4-5-13-10)2-1-3-8-6-9-14-11(8)15(9)12/h1-6,13H/b2-1-,8-3-                         |
| <b>C-51</b>    |  | 21.5486 | 157.2139 | -15.6416 | 16.7246  | 188.1383 | InChI=1S/C12H7N3O/c16-12-10(9-6-15(9)12)7-2-1-4-13-11-8(7)3-5-14-11/h1-6,14H/b10-7+                             |
| <b>X22-3</b>   |  | 4.0731  | 148.6576 | -3.8749  | 39.8264  | 188.16   | InChI=1S/C12H7N3O/c16-10-6-9-11-8(15(9)10)2-1-4-13-7-3-5-14-12(7)11/h1-6,14H/b2-1-,4-1-,8-2-,12-11-,13-4-,13-7- |
| <b>s11-37</b>  |  | 29.1859 | 149.729  | -18.1174 | 13.5391  | 188.2658 | InChI=1S/C12H7N3O/c16-12-10-8(14-9-6-15(9)12)3-1-2-7-4-5-13-11(7)10/h1-6,13H                                    |
| <b>X22-2</b>   |  | 4.0174  | 148.627  | -3.8165  | 38.7633  | 188.3089 | InChI=1S/C12H7N3O/c16-10-6-9-7-2-1-4-13-8-3-5-14-11(8)12(7)15(9)10/h1-6,14H/b2-1-,4-1-,7-2-,12-11-,13-4-,13-8-  |
| <b>o-75</b>    |  | 2.1657  | 32.9716  | -1.0209  | 139.214  | 188.867  | InChI=1S/C12H7N3O/c16-10-6-7-11-9(3-4-13-11)15-5-1-2-8(15)12(10)14-7/h1-6,13H                                   |
| <b>r-4</b>     |  | 5.0505  | 53.4778  | -5.0751  | 117.6826 | 188.9603 | InChI=1S/C12H7N3O/c16-11-9-6-15-10(11)8(9)3-1-2-7-4-5-13-12(7)14-15/h1-6H,(H,13,14)/b3-1-,7-2-                  |
| <b>x4-40</b>   |  | 5.3879  | 76.3699  | -2.4702  | 94.9236  | 189.3458 | InChI=1S/C12H7N3O/c16-12-10-11-9-7(4-5-13-9)2-1-3-8(6-14-10)15(11)12/h1-6,13H/b2-1-,3-1-,7-29,8-3-,11-9+        |
| <b>X22-21</b>  |  | 21.7735 | 157.2358 | -16.0054 | 19.3404  | 189.4612 | InChI=1S/C12H7N3O/c16-12-10(9-6-15(9)12)7-2-1-4-13-8-3-5-14-11(7)8/h1-6,14H/b10-7-                              |

|               |                                                                                     |         |          |          |          |          |                                                                                                             |
|---------------|-------------------------------------------------------------------------------------|---------|----------|----------|----------|----------|-------------------------------------------------------------------------------------------------------------|
| <b>q-49</b>   | 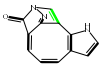   | 3.167   | 56.3556  | -2.3104  | 117.5566 | 189.7924 | InChI=1S/C12H7N3O/c16-12-8-3-1-2-7-4-5-13-10(7)9-6-15(12)14-11(8)9/h1-6,13H/t2-1-,8-3+                      |
|               | $C_{12}H_7N_3O$                                                                     |         |          |          |          |          |                                                                                                             |
| <b>o-82</b>   |    | 2.1749  | 32.8485  | -0.9936  | 139.812  | 189.7929 | InChI=1S/C12H7N3O/c16-10-6-7-8-2-1-5-15(8)9-3-4-13-11(9)12(10)14-7/h1-6,13H                                 |
|               | $C_{12}H_7N_3O$                                                                     |         |          |          |          |          |                                                                                                             |
| <b>A-78</b>   |    | 3.4893  | 34.8422  | -2.1022  | 124.3005 | 190.0713 | InChI=1S/C12H7N3O/c16-12-10-9(6-14-12)7-2-1-5-15(10)11-8(7)3-4-13-11/h1-6,13H                               |
|               | $C_{12}H_7N_3O$                                                                     |         |          |          |          |          |                                                                                                             |
| <b>q1-18</b>  |    | 6.364   | 90.4827  | -5.7725  | 94.3089  | 190.1406 | InChI=1S/C12H7N3O/c16-12-10-7(4-5-13-10)2-1-3-9-8-6-14-11(8)15(9)12/h1-6,13H/t2-1-,9-3+                     |
|               | $C_{12}H_7N_3O$                                                                     |         |          |          |          |          |                                                                                                             |
| <b>o-86</b>   |    | 5.7944  | 37.6499  | -1.6408  | 130.1714 | 190.6841 | InChI=1S/C12H7N3O/c16-12-11-7-2-1-5-15(12)9-3-4-13-10(8)7(6)14-11/h1-6,13H                                  |
|               | $C_{12}H_7N_3O$                                                                     |         |          |          |          |          |                                                                                                             |
| <b>A2-20</b>  |    | 3.2034  | 70.8554  | -1.1244  | 115.3354 | 190.8621 | InChI=1S/C12H7N3O/c16-12-8-2-1-4-13-10-6-9(15)(10)12(11-7(8)3-5-14-11/h1-6,14H/t2-1-,4-1-,8-2-,13-4-,13-10- |
|               | $C_{12}H_7N_3O$                                                                     |         |          |          |          |          |                                                                                                             |
| <b>x2-17</b>  |    | 19.3346 | 126.3221 | -11.3978 | 47.475   | 191.0323 | InChI=1S/C12H7N3O/c16-12-10-7-6-9-8(2-4-14-9)13-3-1-5-15(12)11(7)10/h1-6,14H/t5-1-,7-6-,13-3+               |
|               | $C_{12}H_7N_3O$                                                                     |         |          |          |          |          |                                                                                                             |
| <b>I-13</b>   |    | 11.9386 | 156.9465 | -10.5928 | 11.4469  | 191.3651 | InChI=1S/C12H7N3O/c16-12-7-6-9-13-3-1-5-15(9)8-2-4-14-11(8)10(7)12/h1-5,10,14H                              |
|               | $C_{12}H_7N_3O$                                                                     |         |          |          |          |          |                                                                                                             |
| <b>o-51</b>   |   | 3.109   | 69.592   | -1.3498  | 105.2136 | 191.5327 | InChI=1S/C12H7N3O/c16-11-7-6-8(11)14-12-10(3-4-13-12)15-5-1-2-9(7)15/h1-6,13H/t14-8+                        |
|               | $C_{12}H_7N_3O$                                                                     |         |          |          |          |          |                                                                                                             |
| <b>o-180</b>  |  | 3.4364  | 70.5752  | -1.2293  | 102.2899 | 191.7114 | InChI=1S/C12H7N3O/c16-12-8-6-7(14-8)9-2-1-5-15(9)10-3-4-13-11(10)12/h1-6,13H                                |
|               | $C_{12}H_7N_3O$                                                                     |         |          |          |          |          |                                                                                                             |
| <b>H1-46</b>  |  | 4.7226  | 59.1239  | -0.9962  | 113.0796 | 191.7272 | InChI=1S/C12H7N3O/c16-10-3-1-2-7-8-4-5-13-11(8)15-9(7)6-14-12(10)15/h1-6,13H/t3-1-,7-2-                     |
|               | $C_{12}H_7N_3O$                                                                     |         |          |          |          |          |                                                                                                             |
| <b>E-36</b>   |  | 8.3379  | 135.9304 | 0.1856   | 19.6237  | 191.7293 | InChI=1S/C12H7N3O/c16-11-6-10-8(11)2-1-3-9-7-4-5-13-12(7)15(10)14-9/h1-6,13H/t3-1-,8-2+                     |
|               | $C_{12}H_7N_3O$                                                                     |         |          |          |          |          |                                                                                                             |
| <b>A2-41</b>  |  | 3.6878  | 77.7517  | -0.9857  | 103.5818 | 191.8679 | InChI=1S/C12H7N3O/c16-12-11-10-6-8-7(3-5-13-8)9(15)(10)12(2-1-4-14-11/h1-6,13H/t2-1-,4-1-,9-2-,14-4-,14-11- |
|               | $C_{12}H_7N_3O$                                                                     |         |          |          |          |          |                                                                                                             |
| <b>x6-40</b>  |  | 15.7612 | 123.1308 | -10.7783 | 37.906   | 191.9173 | InChI=1S/C12H7N3O/c16-9-3-1-2-7-4-5-13-8(7)6-10-14-12-11(9)15(10)12/h1-6,13H/t3-1-,7-2-,8-6+                |
|               | $C_{12}H_7N_3O$                                                                     |         |          |          |          |          |                                                                                                             |
| <b>H11-67</b> |  | 4.3531  | 29.3777  | -1.1756  | 145.7394 | 192.017  | InChI=1S/C12H7N3O/c16-11-6-8-12-7(4-5-13-12)9-2-1-3-10(14-8)15(9)11/h1-6,13H                                |
|               | $C_{12}H_7N_3O$                                                                     |         |          |          |          |          |                                                                                                             |
| <b>I-19</b>   |  | 4.471   | 49.9794  | -2.7877  | 117.9557 | 192.5579 | InChI=1S/C12H7N3O/c16-11-7-6-8(11)12-14-3-1-5-15(12)9-2-4-13-10(7)9/h1-6,13H                                |
|               | $C_{12}H_7N_3O$                                                                     |         |          |          |          |          |                                                                                                             |
| <b>B-21</b>   |  | 6.3858  | 52.7413  | -1.4743  | 97.3776  | 192.6615 | InChI=1S/C12H7N3O/c16-10-6-9-7-2-1-5-15(10)14-12(9)11-8(7)3-4-13-11/h1-6,13H/t5-1-,7-2-                     |
|               | $C_{12}H_7N_3O$                                                                     |         |          |          |          |          |                                                                                                             |
| <b>B-66</b>   |  | 2.3806  | 31.5196  | -1.4024  | 143.2325 | 192.6658 | InChI=1S/C12H7N3O/c16-12-8-6-10(14-12)15-5-1-2-9(15)7-3-4-13-11(7)8/h1-6,13H                                |
|               | $C_{12}H_7N_3O$                                                                     |         |          |          |          |          |                                                                                                             |
| <b>x7-16</b>  |  | 15.9834 | 152.0666 | -10.9336 | 16.8512  | 193.1598 | InChI=1S/C12H7N3O/c16-9-3-1-2-7-4-5-13-11(7)10(9)12-8-6-14-15(8)12/h1-6,13H                                 |
|               | $C_{12}H_7N_3O$                                                                     |         |          |          |          |          |                                                                                                             |

|               |                                                                                     |         |          |          |          |          |                                                                                                         |
|---------------|-------------------------------------------------------------------------------------|---------|----------|----------|----------|----------|---------------------------------------------------------------------------------------------------------|
| <b>H-106</b>  |    | 7.9994  | 150.2604 | -1.8262  | 17.9143  | 193.2735 | InChI=1S/C12H7N3O/c16-12-11-10-9(4-5-13-10)8-3-1-2-7(8)6-15(12)14-11/h1-6,13H/b7-6+                     |
|               | $C_{12}H_7N_3O$                                                                     |         |          |          |          |          |                                                                                                         |
| <b>B-117</b>  |    | 5.1653  | 34.0296  | -0.9789  | 133.5773 | 193.2756 | InChI=1S/C12H7N3O/c16-12-9-6-10-7(2-1-5-15(10)12)8-3-4-13-11(8)14-9/h1-6,13H                            |
|               | $C_{12}H_7N_3O$                                                                     |         |          |          |          |          |                                                                                                         |
| <b>q-22</b>   |    | 5.6087  | 79.3971  | -2.3508  | 96.5773  | 193.5204 | InChI=1S/C12H7N3O/c16-12-11-8-3-1-2-7-4-5-13-10(7)9(6-14-11)15(8)12/h1-6,13H/b2-1-,3-1-,7-2-,8-3-,10-9+ |
|               | $C_{12}H_7N_3O$                                                                     |         |          |          |          |          |                                                                                                         |
| <b>A2-56</b>  |    | 4.5262  | 55.1997  | -1.2475  | 117.7667 | 194.1001 | InChI=1S/C12H7N3O/c16-10-6-9-7-2-1-4-13-12(10)15(9)11-8(7)3-5-14-11/h1-6,14H/b4-1-,7-2-,13-12+          |
|               | $C_{12}H_7N_3O$                                                                     |         |          |          |          |          |                                                                                                         |
| <b>r-15</b>   |    | 4.1907  | 85.3634  | -4.4024  | 106.0149 | 194.1454 | InChI=1S/C12H7N3O/c16-12-9-6-15(12)11-8(9)3-1-2-7-4-5-13-10(7)14-11/h1-6H, (H,13,14)                    |
|               | $C_{12}H_7N_3O$                                                                     |         |          |          |          |          |                                                                                                         |
| <b>r1-7</b>   |    | 13.2254 | 117.6991 | -10.7014 | 61.2287  | 194.1483 | InChI=1S/C12H7N3O/c16-9-3-1-2-7-4-5-13-12(7)14-10-8-6-15(9)11(8)10/h1-6H, (H,13,14)/b3-1-,7-2-          |
|               | $C_{12}H_7N_3O$                                                                     |         |          |          |          |          |                                                                                                         |
| <b>q11-65</b> |    | 3.5248  | 52.533   | -2.7291  | 119.3861 | 194.2395 | InChI=1S/C12H7N3O/c16-12-8-3-1-2-7-4-5-13-10(7)11-9(8)6-15(12)14-11/h1-6,13H/b2-1-,8-3+                 |
|               | $C_{12}H_7N_3O$                                                                     |         |          |          |          |          |                                                                                                         |
| <b>o-36</b>   |    | 2.4785  | 31.8613  | -1.2981  | 144.4271 | 194.3986 | InChI=1S/C12H7N3O/c16-12-7-6-14-11(12)8-2-1-5-15(8)9-3-4-13-10(7)9/h1-6,13H                             |
|               | $C_{12}H_7N_3O$                                                                     |         |          |          |          |          |                                                                                                         |
| <b>o-126</b>  |    | 2.3875  | 74.6673  | -1.7146  | 108.4398 | 194.4732 | InChI=1S/C12H7N3O/c16-10-7-2-1-5-15-9-3-4-13-11(9)14-12(15)8(10)6-7/h1-6,13H/b5-1-,7-2+                 |
|               | $C_{12}H_7N_3O$                                                                     |         |          |          |          |          |                                                                                                         |
| <b>s11-39</b> |   | 3.5121  | 53.2085  | -2.7216  | 119.4333 | 194.6104 | InChI=1S/C12H7N3O/c16-12-10-8-6-15(12)14-9(8)3-1-2-7-4-5-13-11(7)10/h1-6,13H/b3-1-,7-2-,11-10-          |
|               | $C_{12}H_7N_3O$                                                                     |         |          |          |          |          |                                                                                                         |
| <b>G1-68</b>  |  | 15.3827 | 151.5405 | -10.9756 | 18.1523  | 195.3412 | InChI=1S/C12H7N3O/c16-10-3-1-2-8(7-4-5-13-11(7)10)12-9-6-14-15(9)12/h1-6,13H                            |
|               | $C_{12}H_7N_3O$                                                                     |         |          |          |          |          |                                                                                                         |
| <b>x9-25</b>  |  | 15.9444 | 153.012  | -10.9392 | 16.551   | 196.0665 | InChI=1S/C12H7N3O/c16-12-8(11-9-6-14-15(9)11)3-1-2-7-4-5-13-10(7)12/h1-6,13H                            |
|               | $C_{12}H_7N_3O$                                                                     |         |          |          |          |          |                                                                                                         |
| <b>H-23</b>   |  | 4.6117  | 137.4506 | -1.8718  | 55.6449  | 196.1947 | InChI=1S/C12H7N3O/c16-12-7-2-1-3-8-9-4-5-13-10(9)11(8)14-15(12)6-7/h1-6,13H/b2-1-,8-3-,14-11+           |
|               | $C_{12}H_7N_3O$                                                                     |         |          |          |          |          |                                                                                                         |
| <b>B-52</b>   |  | 2.0557  | 32.9466  | -0.9800  | 147.5796 | 196.2259 | InChI=1S/C12H7N3O/c16-9-6-10-14-12(9)11-7(3-4-13-11)8-2-1-5-15(8)10/h1-6,13H                            |
|               | $C_{12}H_7N_3O$                                                                     |         |          |          |          |          |                                                                                                         |
| <b>G-63</b>   |  | 4.759   | 39.4986  | -1.1245  | 131.5732 | 196.3838 | InChI=1S/C12H7N3O/c16-12-11-8(4-5-13-11)7-2-1-3-9-10(7)14-6-15(9)12/h1-6,13H                            |
|               | $C_{12}H_7N_3O$                                                                     |         |          |          |          |          |                                                                                                         |
| <b>B-115</b>  |  | 5.3757  | 32.2214  | -0.8095  | 132.4213 | 196.4807 | InChI=1S/C12H7N3O/c16-12-9-6-10-7(2-1-5-15(10)14-9)8-3-4-13-11(8)12/h1-6,13H                            |
|               | $C_{12}H_7N_3O$                                                                     |         |          |          |          |          |                                                                                                         |
| <b>s12-30</b> |  | 7.4878  | 87.0626  | -5.6032  | 102.1504 | 196.6345 | InChI=1S/C12H7N3O/c16-12-10-11-8(14-10)3-1-2-7-4-5-13-9(7)6-15(11)12/h1-6,13H/b3-1-,7-2-,9-6+           |
|               | $C_{12}H_7N_3O$                                                                     |         |          |          |          |          |                                                                                                         |
| <b>H1-125</b> |  | 4.1118  | 96.1394  | -0.2098  | 90.2526  | 196.9734 | InChI=1S/C12H7N3O/c16-10-3-1-2-9-7-4-5-13-11(7)8-6-15(10)12(8)14-9/h1-6,13H/b3-1-,9-2-                  |
|               | $C_{12}H_7N_3O$                                                                     |         |          |          |          |          |                                                                                                         |
| <b>o-202</b>  |  | 5.3947  | 40.399   | -1.4307  | 137.4653 | 197.1262 | InChI=1S/C12H7N3O/c16-12-8-6-14-10-7(8)2-1-5-15(12)9-3-4-13-11(9)10/h1-6,13H                            |
|               | $C_{12}H_7N_3O$                                                                     |         |          |          |          |          |                                                                                                         |

|               |  |          |           |           |           |           |                                                                                                               |
|---------------|--|----------|-----------|-----------|-----------|-----------|---------------------------------------------------------------------------------------------------------------|
| <b>G-76</b>   |  | 3. 8322  | 87. 1896  | -2. 5874  | 105. 2713 | 197. 5654 | InChI=1S/C12H7N3O/c16-12-14-6-15(12)11-8-2-1-3-9(11)10-7(8)4-5-13-10/h1-6, 13H                                |
| <b>A-80</b>   |  | 3. 5692  | 35. 8233  | -2. 1671  | 132. 2546 | 197. 5835 | InChI=1S/C12H7N3O/c16-12-10-7-2-1-5-15(9(10)6-14-12)11-8(7)3-4-13-11/h1-6, 13H                                |
| <b>r-32</b>   |  | 22. 0594 | 167. 2708 | -14. 9091 | 16. 3014  | 197. 6605 | InChI=1S/C12H7N3O/c16-12-8-3-1-2-7-4-5-13-11(7)14-10(8)9-6-15(9)12/h1-6H, (H, 13, 14)                         |
| <b>B-75</b>   |  | 2. 6207  | 67. 9332  | -1. 1617  | 113. 2062 | 197. 6812 | InChI=1S/C12H7N3O/c16-12-8-6-10(14-8)15-5-1-2-9(15)7-3-4-13-11(7)12/h1-6, 13H                                 |
| <b>X-20</b>   |  | 3. 6396  | 39. 3416  | 0. 3498   | 138. 6864 | 198. 0779 | InChI=1S/C13H11N3O/c1-16-8-9-3-2-5-14-11(7-12(16)17)13-10(9)4-6-15-13/h2-8, 15H, H3/h3-2-, 9-8-, 11-7-, 14-5- |
| <b>B-251</b>  |  | 19. 5566 | 152. 7600 | -11. 6943 | 13. 4288  | 198. 3912 | InChI=1S/C12H7N3O/c16-12-11-8(3-4-13-11)7-2-1-5-15-6-9(15)10(7)14-12/h1-6, 13H                                |
| <b>x2-4</b>   |  | 20. 5461 | 140. 7699 | -11. 5038 | 28. 2621  | 198. 5072 | InChI=1S/C12H7N3O/c16-12-7-6-9-8(2-4-14-9)13-3-1-5-15-10(7)11(12)15/h1-6, 14H/h5-1-, 7-6-, 13-3+              |
| <b>X23-6</b>  |  | 6. 7308  | 87. 8405  | -5. 1731  | 110. 7353 | 198. 6276 | InChI=1S/C12H7N3O/c16-12-8-6-7-2-1-4-13-9-3-5-14-11(9)15(12)10(7)8/h1-6, 14H/h2-1-, 13-4-                     |
| <b>q-67</b>   |  | 5. 5478  | 117. 6032 | -0. 6777  | 71. 8415  | 198. 7185 | InChI=1S/C12H7N3O/c16-12-14-11-8-3-1-2-7-4-5-13-10(7)9(6-8)15(11)12/h1-6, 13H/h2-1-, 3-1-, 7-2-, 8-3-, 10-9-  |
| <b>G-68</b>   |  | 3. 6332  | 85. 1245  | -2. 6736  | 105. 2229 | 198. 9734 | InChI=1S/C12H7N3O/c16-10-6-14-15(10)12-8-2-1-3-9(12)11-7(8)4-5-13-11/h1-6, 13H                                |
| <b>H11-87</b> |  | 5. 2578  | 71. 6006  | -1. 8279  | 122. 284  | 199. 4523 | InChI=1S/C12H7N3O/c16-12-8-2-1-3-10-14-11(15(10)12)6-9-7(8)4-5-13-9/h1-6, 13H                                 |
| <b>r-2</b>    |  | 5. 3419  | 51. 5049  | -4. 9031  | 131. 0908 | 199. 4916 | InChI=1S/C12H7N3O/c16-11-8-3-1-2-7-4-5-13-12(7)14-15-9(8)6-10(11)15/h1-6H, (H, 13, 14)/h3-1-, 7-2-            |
| <b>F-6</b>    |  | 6. 0618  | 85. 816   | -2. 0488  | 91. 8315  | 199. 955  | InChI=1S/C12H7N3O/c16-11-7-2-1-3-9-8-4-5-13-12(8)14-15(9)10(11)6-7/h1-6H, (H, 13, 14)/h3-1-, 7-2-             |
| <b>o-144</b>  |  | 8. 3812  | 62. 9362  | 0. 3676   | 103. 6842 | 200. 059  | InChI=1S/C12H7N3O/c16-10-6-8-11-7(10)2-1-5-15(14-11)9-3-4-13-12(8)9/h1-6, 13H                                 |
| <b>G1-42</b>  |  | 12. 7837 | 153. 9825 | -6. 5026  | 20. 2053  | 200. 0878 | InChI=1S/C12H7N3O/c16-9-3-1-2-7-8-4-5-13-12(8)14-6-15-10(7)11(9)15/h1-6, 13H                                  |
| <b>B-62</b>   |  | 24. 8968 | 131. 2636 | -16. 4417 | 40. 6715  | 200. 2822 | InChI=1S/C12H7N3O/c16-12-8-6-9(8)14-11-7(3-4-13-11)10-2-1-5-15(10)12/h1-6, 13H/h14-9-                         |
| <b>s12-42</b> |  | 13. 8088 | 157. 3361 | -8. 7276  | 16. 0777  | 200. 4169 | InChI=1S/C12H7N3O/c16-12-14-8-3-1-2-7-4-5-13-9(7)6-10-11(8)15(10)12/h1-6, 13H/h3-1-, 7-2-, 9-6+               |
| <b>A-165</b>  |  | 11. 1724 | 155. 4483 | -6. 3101  | 16. 6695  | 200. 6597 | InChI=1S/C12H7N3O/c16-12-11-10-8(2-1-5-15(10)11)7-3-4-13-9(7)6-14-12/h1-6, 13H/h14-6-                         |
| <b>G-45</b>   |  | 2. 975   | 85. 2699  | -0. 8383  | 102. 7676 | 201. 1512 | InChI=1S/C12H7N3O/c16-12-10-7-2-1-3-9(10)14-6-15(12)11-8(7)4-5-13-11/h1-6, 13H                                |

|                |                                                                                                              |         |          |          |          |          |                                                                                                           |
|----------------|--------------------------------------------------------------------------------------------------------------|---------|----------|----------|----------|----------|-----------------------------------------------------------------------------------------------------------|
| <b>H1-28</b>   | 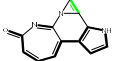<br><chem>C12H9N3O</chem>   | 26.0732 | 157.6419 | -17.051  | 14.5391  | 201.2877 | InChI=1S/C12H7N3O/c16-10-3-1-2-8-7-4-5-13-11(7)9-6-15(9)12(8)14-10/h1-6,13H                               |
| <b>r1-31</b>   | <br><chem>C12H9N3O</chem>   | 13.9961 | 135.3994 | -13.918  | 53.0801  | 201.6113 | InChI=1S/C12H7N3O/c16-10-3-1-2-7-4-5-13-11(7)14-12-8-6-9(8)15(10)12/h1-6H, (H,13,14)/b3-1-,7-2-           |
| <b>H11-141</b> | <br><chem>C12H9N3O</chem>   | 4.9332  | 42.611   | -0.7141  | 126.1791 | 201.8289 | InChI=1S/C12H7N3O/c16-12-10-6-7-2-1-3-9(15(10)14-7)8-4-5-13-11(8)12/h1-6,13H                              |
| <b>H-159</b>   | <br><chem>C12H9N3O</chem>   | 2.8113  | 88.3997  | -1.4149  | 106.5172 | 202.3606 | InChI=1S/C12H7N3O/c16-12-14-11-9-3-1-2-7(15(11)12)6-10-8(9)4-5-13-10/h1-6,13H                             |
| <b>H-153</b>   | <br><chem>C12H9N3O</chem>   | 2.7674  | 88.9402  | -1.415   | 106.2531 | 202.5799 | InChI=1S/C12H7N3O/c16-12-14-11-7-2-1-3-10(15(11)12)8-4-5-13-9(8)6-7/h1-6,13H                              |
| <b>H1-2</b>    | <br><chem>C12H9N3O</chem>   | 32.5001 | 151.524  | -18.9256 | 18.3715  | 202.7886 | InChI=1S/C12H7N3O/c16-9-3-1-2-7-8-4-5-13-12(8)15-6-10(15)14-11(7)9/h1-6,13H                               |
| <b>H1-1</b>    | <br><chem>C12H9N3O</chem>   | 10.1248 | 157.0471 | -6.7654  | 15.6791  | 203.0717 | InChI=1S/C12H7N3O/c16-10-3-1-2-7-8-4-5-13-11(8)9-6-15(9)14-12(7)10/h1-6,13H                               |
| <b>A-200</b>   | <br><chem>C12H9N3O</chem>   | 4.3229  | 48.8463  | -0.9987  | 122.7673 | 203.5869 | InChI=1S/C12H7N3O/c16-12-9-7-2-1-5-15(12)6-14-11(9)10-8(7)3-4-13-10/h1-6,13H                              |
| <b>p1-11</b>   | <br><chem>C12H9N3O</chem>   | 5.2979  | 47.8191  | -4.6813  | 145.9246 | 203.7847 | InChI=1S/C12H7N3O/c16-10-3-1-2-7-4-5-13-11(7)12-8-6-9(14-12)15(8)10/h1-6,13H/b3-1-,7-2-,12-11-            |
| <b>H11-145</b> | <br><chem>C12H9N3O</chem> | 5.8911  | 35.3454  | -0.7056  | 136.0079 | 204.0675 | InChI=1S/C12H7N3O/c16-12-8-6-15-9(2-1-3-10(15)14-8)7-4-5-13-11(7)12/h1-6,13H                              |
| <b>q1-33</b>   | <br><chem>C12H9N3O</chem> | 5.254   | 56.2389  | -4.8825  | 126.2473 | 204.1585 | InChI=1S/C12H7N3O/c16-12-10-6-8-9(15(10)14-8)3-1-2-7-4-5-13-11(7)12/h1-6,13H/b2-1-,9-3-                   |
| <b>B-236</b>   | <br><chem>C12H9N3O</chem> | 5.9406  | 51.4285  | -1.3711  | 114.7518 | 204.3059 | InChI=1S/C12H7N3O/c16-12-14-11-7-2-1-5-15(12)6-9(11)10-8(7)3-4-13-10/h1-6,13H/b5-1-,7-2-                  |
| <b>s11-42</b>  | <br><chem>C12H9N3O</chem> | 9.918   | 158.9866 | 0.5146   | 15.8662  | 204.4707 | InChI=1S/C12H7N3O/c16-10-6-8-12-11-7(4-5-13-11)2-1-3-9(14-12)15(8)10/h1-6,13H/b2-1-,3-1-,7-2-,9-3+,12-11+ |
| <b>A-60</b>    | <br><chem>C12H9N3O</chem> | 5.1618  | 45.5747  | -0.2571  | 131.3653 | 204.7129 | InChI=1S/C12H7N3O/c16-12-8-2-1-5-15-11(12)9(6-14-15)10-7(8)3-4-13-10/h1-6,13H                             |
| <b>x5-10</b>   | <br><chem>C12H9N3O</chem> | 51.1042 | 154.7884 | -28.9274 | 11.0764  | 204.7688 | InChI=1S/C12H7N3O/c16-11-9-10(11)15(9)6-8-3-1-2-7-4-5-13-12(7)14-8/h1-6H, (H,13,14)/b8-6-                 |
| <b>C-62</b>    | <br><chem>C12H9N3O</chem> | 27.5081 | 154.8625 | -17.4980 | 14.8557  | 204.7839 | InChI=1S/C12H7N3O/c16-12-11-8(2-1-4-14-12)7-3-5-13-10(7)9-6-15(9)11/h1-6,13H                              |
| <b>C-15</b>    | <br><chem>C12H9N3O</chem> | 22.9529 | 152.5482 | -12.4385 | 20.3836  | 204.8985 | InChI=1S/C12H7N3O/c16-11-9-6-15(9)12-8(2-1-4-14-12)7-3-5-13-10(7)11/h1-6,13H                              |
| <b>p1-13</b>   | <br><chem>C12H9N3O</chem> | 4.2278  | 164.4442 | -1.435   | 19.8872  | 205.0896 | InChI=1S/C12H7N3O/c16-9-3-1-2-7-4-5-13-11(7)12-14-10-6-8(9)15(10)12/h1-6,13H/b3-1-,7-2-,12-11+            |
| <b>G-62</b>    | <br><chem>C12H9N3O</chem> | 5.1842  | 43.9755  | -1.2443  | 129.1464 | 205.0977 | InChI=1S/C12H7N3O/c16-12-11-8(4-5-13-11)7-2-1-3-10-9(7)6-14-15(10)12/h1-6,13H                             |

|               |                                                                                     |         |          |          |          |          |                                                                                                                 |
|---------------|-------------------------------------------------------------------------------------|---------|----------|----------|----------|----------|-----------------------------------------------------------------------------------------------------------------|
| <b>r-58</b>   | 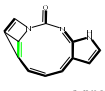   | 17.095  | 150.7892 | -11.6145 | 35.5085  | 205.1282 | InChI=1S/C12H7N3O/c16-12-14-11-7(4-5-13-11)2-1-3-8-9-6-15(12)10(8)9/h1-6H, (H, 13, 14, 16)/b3-1-, 7-2-          |
| <b>B-226</b>  |    | 5.1240  | 34.9950  | -0.3474  | 142.0440 | 205.1912 | InChI=1S/C12H7N3O/c16-11-9-6-15-5-1-2-8(12(15)14-9)7-3-4-13-10(7)11/h1-6, 13H                                   |
| <b>H11-74</b> |    | 4.2806  | 38.0105  | -1.9891  | 138.6704 | 205.1943 | InChI=1S/C12H7N3O/c16-12-11-9(4-5-13-11)8-3-1-2-7-6-10(8)15(12)14-7/h1-6, 13H                                   |
| <b>B-203</b>  |    | 6.9680  | 37.0691  | -1.8861  | 131.5896 | 205.3937 | InChI=1S/C12H7N3O/c16-11-10-8(3-4-13-10)7-2-1-5-15-9(7)6-14-12(11)15/h1-6, 13H                                  |
| <b>C-67</b>   |    | 5.0187  | 62.2587  | -3.0194  | 131.6022 | 205.5432 | InChI=1S/C12H7N3O/c16-12-11-8(3-5-14-11)7-2-1-4-13-10-6-9(7)15(10)12/h1-6, 14H/b2-1-, 4-1-, 7-2-, 13-4-, 13-10+ |
| <b>A2-18</b>  |    | 5.0013  | 62.1845  | -3.0195  | 131.7378 | 205.5477 | InChI=1S/C12H7N3O/c16-12-11-8(3-5-14-11)7-2-1-4-13-10-6-9(7)15(10)12/h1-6, 14H/b2-1-, 4-1-, 7-2-, 13-4-, 13-10+ |
| <b>x5-27</b>  |    | 12.4707 | 131.9353 | -9.5242  | 46.568   | 205.8154 | InChI=1S/C12H7N3O/c16-9-6-8-3-1-2-7-4-5-13-11(7)14-12-10(9)15(8)12/h1-6H, (H, 13, 14)/b3-1-, 7-2-               |
| <b>H1-6</b>   |    | 2.9475  | 32.0025  | -1.5479  | 151.0325 | 206.0314 | InChI=1S/C12H7N3O/c16-10-3-1-2-7-8-4-5-13-12(8)15-6-9(10)11(7)14-15/h1-6, 13H                                   |
| <b>q11-50</b> |   | 2.7391  | 78.1386  | -1.0227  | 122.7792 | 206.4645 | InChI=1S/C12H7N3O/c16-12-11-10-7(4-5-13-10)2-1-3-8-6-9(14-11)15(8)12/h1-6, 13H/b2-1-, 3-1-, 7-2-, 8-3-, 11-10+  |
| <b>A-168</b>  |  | 50.6349 | 164.1033 | -28.9094 | 10.0558  | 206.5689 | InChI=1S/C12H7N3O/c16-11-9-10(11)15(9)5-1-2-7-6-14-12-8(7)3-4-13-12/h1-6, 13H/b5-1-, 7-2+                       |
| <b>o-37</b>   |  | 2.9999  | 70.9155  | -1.7767  | 116.6809 | 206.7321 | InChI=1S/C12H7N3O/c16-12-8-6-7-9(3-4-13-7)15-5-1-2-10(15)11(12)14-8/h1-6, 13H/b8-6-                             |
| <b>B-133</b>  |  | 4.1872  | 39.2540  | -0.8166  | 146.7820 | 207.0045 | InChI=1S/C12H7N3O/c16-12-10-6-9-7(3-4-13-9)8-2-1-5-15(12)11(8)14-10/h1-6, 13H                                   |
| <b>x4-62</b>  |  | 12.7983 | 151.7478 | -6.7907  | 19.3227  | 207.057  | InChI=1S/C12H7N3O/c16-12-8-3-1-2-7-4-5-13-9(7)11-10(8)15(11)6-14-12/h1-6, 13H/b2-1-, 3-1-, 7-2-, 8-3+, 11-9-    |
| <b>q1-8</b>   |  | 7.6014  | 57.5418  | -8.1189  | 116.5029 | 207.2088 | InChI=1S/C12H7N3O/c16-10-6-9-12-8(15(9)14-12)3-1-2-7-4-5-13-11(7)10/h1-6, 13H/b2-1-, 8-3+, 9-6+                 |
| <b>p1-20</b>  |  | 17.4418 | 138.4803 | -14.5626 | 41.6261  | 207.2405 | InChI=1S/C12H7N3O/c16-9-3-1-2-7-4-5-13-10(7)12-11(14-9)8-6-15(8)12/h1-6, 13H/b3-1-, 7-2-, 12-10-, 14-11-        |
| <b>G-23</b>   |  | 7.2049  | 135.7461 | 0.0109   | 48.1927  | 207.3029 | InChI=1S/C12H7N3O/c16-12-7-2-1-3-9-8-4-5-13-10(8)11(9)15(12)14-6-7/h1-6, 13H/b3-1-, 7-2-                        |
| <b>B-223</b>  |  | 2.9610  | 70.5162  | -1.7344  | 116.8846 | 207.4899 | InChI=1S/C12H7N3O/c16-12-8-6-15-5-1-2-9(15)7-3-4-13-10(7)11(12)14-8/h1-6, 13H/b8-6-                             |
| <b>o-204</b>  |  | 4.3926  | 65.6973  | -1.3025  | 129.7869 | 207.5686 | InChI=1S/C12H7N3O/c16-12-8-6-9-7(8)2-1-5-15(12)10-3-4-13-11(10)14-9/h1-6, 13H/b14-9-                            |
| <b>A-197</b>  |  | 5.021   | 47.1283  | -0.1921  | 134.4048 | 208.1973 | InChI=1S/C12H7N3O/c16-12-8-2-1-5-15-6-14-10(11(12)15)9-7(8)3-4-13-9/h1-6, 13H                                   |

|               |                                                                                     |         |          |          |          |          |                                                                                                                |
|---------------|-------------------------------------------------------------------------------------|---------|----------|----------|----------|----------|----------------------------------------------------------------------------------------------------------------|
| <b>p-4</b>    | 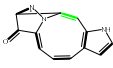   | 6.0387  | 54.2327  | -5.065   | 129.744  | 208.3963 | InChI=1S/C12H7N3O/c16-12-9-3-1-2-7-4-5-13-8(7)6-10-11(12)14-15(9)10/h1-6,13H/b2-1-,9-3-,10-6-                  |
|               | $C_{12}H_7N_3O$                                                                     |         |          |          |          |          |                                                                                                                |
| <b>G1-65</b>  |    | 25.5558 | 157.1772 | -13.2852 | 22.1485  | 208.4285 | InChI=1S/C12H7N3O/c16-10-3-1-2-8-7-4-5-13-12(7)14-6-9-11(10)15(8)9/h1-6,13H                                    |
|               | $C_{12}H_7N_3O$                                                                     |         |          |          |          |          |                                                                                                                |
| <b>r-26</b>   |    | 14.6717 | 155.5602 | -10.2728 | 20.9095  | 208.4836 | InChI=1S/C12H7N3O/c16-12-9-6-9-8(15)9(10)3-1-2-7-4-5-13-11(7)14-12/h1-6H,13,14,16                              |
|               | $C_{12}H_7N_3O$                                                                     |         |          |          |          |          |                                                                                                                |
| <b>B-228</b>  |    | 5.7565  | 134.8823 | -2.0770  | 70.7178  | 208.5443 | InChI=1S/C12H7N3O/c16-12-9-6-15(12)5-1-2-7-8-3-4-13-10(8)11(7)14-9/h1-6,13H/b5-1-,7-2-,14-11+                  |
|               | $C_{12}H_7N_3O$                                                                     |         |          |          |          |          |                                                                                                                |
| <b>G-3</b>    |    | 4.8578  | 46.7798  | -0.1851  | 137.1473 | 208.5629 | InChI=1S/C12H7N3O/c16-11-7-2-1-3-8-9-4-5-13-12(9)15(10)11(8)11-14-6-7/h1-6,13H                                 |
|               | $C_{12}H_7N_3O$                                                                     |         |          |          |          |          |                                                                                                                |
| <b>s12-24</b> |    | 10.3107 | 141.2797 | -6.6163  | 42.8587  | 208.8339 | InChI=1S/C12H7N3O/c16-12-11-10-8(14-12)3-1-2-7-4-5-13-9(7)6-15(10)11/h1-6,13H/b3-1-,7-2-,9-6-                  |
|               | $C_{12}H_7N_3O$                                                                     |         |          |          |          |          |                                                                                                                |
| <b>k1-15</b>  |    | 8.4273  | 71.8097  | -7.7112  | 105.1349 | 208.9446 | InChI=1S/C12H7N3O/c16-12-10-8-6-9(10)15(8)5-1-3-13-7-2-4-14-11(7)12/h1-6,14H/b5-1-,13-3+                       |
|               | $C_{12}H_7N_3O$                                                                     |         |          |          |          |          |                                                                                                                |
| <b>H-49</b>   |    | 5.7122  | 35.2984  | -2.2899  | 147.3529 | 208.9858 | InChI=1S/C12H7N3O/c16-10-6-7-2-1-3-9-8-4-5-13-11(8)14-12(7)15(9)10/h1-6,13H                                    |
|               | $C_{12}H_7N_3O$                                                                     |         |          |          |          |          |                                                                                                                |
| <b>F-71</b>   |    | 19.8158 | 165.3877 | -13.9605 | 16.0914  | 209.0142 | InChI=1S/C12H7N3O/c16-12-14-11-9(4-5-13-11)7-2-1-3-8(7)10-6-15(10)12/h1-6H,13,14,16)/b9-7-                     |
|               | $C_{12}H_7N_3O$                                                                     |         |          |          |          |          |                                                                                                                |
| <b>p1-26</b>  |   | 17.2208 | 144.0024 | -11.5533 | 37.0872  | 209.3657 | InChI=1S/C12H7N3O/c16-9-3-1-2-7-4-5-13-10(7)12-14-11(9)8-6-15(8)12/h1-6,13H/b3-1-,7-2-,12-10-                  |
|               | $C_{12}H_7N_3O$                                                                     |         |          |          |          |          |                                                                                                                |
| <b>q1-21</b>  |  | 7.4753  | 57.8675  | -8.14    | 117.4465 | 209.531  | InChI=1S/C12H7N3O/c16-12-10-7(4-5-13-10)2-1-3-9-8-6-15(9)11(8)14-12/h1-6,13H/b2-1-,9-3+,14-11+                 |
|               | $C_{12}H_7N_3O$                                                                     |         |          |          |          |          |                                                                                                                |
| <b>i-9</b>    |  | 7.1186  | 90.4082  | -3.9051  | 96.4049  | 209.5406 | InChI=1S/C12H7N3O/c16-12-7-6-15(12)9-2-1-4-13-8-3-5-14-11(8)10(7)9/h1-6,14H/b2-1-,4-1-,9-2+,11-10+,13-4+,13-8+ |
|               | $C_{12}H_7N_3O$                                                                     |         |          |          |          |          |                                                                                                                |
| <b>r-49</b>   |  | 5.9773  | 87.5197  | -4.645   | 112.9676 | 209.6268 | InChI=1S/C12H7N3O/c16-12-8-6-10-14-11-7(4-5-13-11)2-1-3-9(8)15(10)12/h1-6H,13,14                               |
|               | $C_{12}H_7N_3O$                                                                     |         |          |          |          |          |                                                                                                                |
| <b>H-104</b>  |  | 22.6259 | 155.2592 | -12.3555 | 16.4426  | 209.6434 | InChI=1S/C12H7N3O/c16-12-10-8(4-5-13-10)9-3-1-2-7-6-15(7)11(9)14-12/h1-6,13H                                   |
|               | $C_{12}H_7N_3O$                                                                     |         |          |          |          |          |                                                                                                                |
| <b>B-50</b>   |  | 6.6254  | 35.7588  | -1.9484  | 138.6494 | 209.8548 | InChI=1S/C12H7N3O/c16-10-6-9-7-2-1-5-15(9)12(10)14-11-8(7)3-4-13-11/h1-6,13H                                   |
|               | $C_{12}H_7N_3O$                                                                     |         |          |          |          |          |                                                                                                                |
| <b>H1-85</b>  |  | 17.1281 | 134.0246 | -12.5559 | 44.0856  | 209.8655 | InChI=1S/C12H7N3O/c16-11-3-1-2-9-7-4-5-13-12(7)14-8-6-10(8)15(9)11/h1-6,13H                                    |
|               | $C_{12}H_7N_3O$                                                                     |         |          |          |          |          |                                                                                                                |
| <b>B-193</b>  |  | 5.0650  | 110.0433 | -2.0341  | 92.7341  | 210.7179 | InChI=1S/C12H7N3O/c16-12-10-8(3-4-13-10)7-2-1-5-15(12)11-9(7)6-14-11/h1-6,13H                                  |
|               | $C_{12}H_7N_3O$                                                                     |         |          |          |          |          |                                                                                                                |
| <b>k-18</b>   |  | 4.5711  | 59.3064  | -4.9526  | 136.6344 | 211.0917 | InChI=1S/C12H7N3O/c16-12-7-6-15-5-1-3-13-8-2-4-14-10(8)9(7)11(12)15/h1-6,14H/b5-1-,13-3-                       |
|               | $C_{12}H_7N_3O$                                                                     |         |          |          |          |          |                                                                                                                |
| <b>B-191</b>  |  | 2.4485  | 143.5660 | -1.2992  | 50.2164  | 211.2176 | InChI=1S/C12H7N3O/c16-12-8-2-1-5-15(12)11-9(6-14-11)10-7(8)3-4-13-10/h1-6,13H                                  |
|               | $C_{12}H_7N_3O$                                                                     |         |          |          |          |          |                                                                                                                |

|               |                                                                                     |          |           |           |           |           |                                                                                                              |
|---------------|-------------------------------------------------------------------------------------|----------|-----------|-----------|-----------|-----------|--------------------------------------------------------------------------------------------------------------|
| <b>x6-4</b>   | 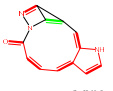   | 16, 4794 | 133, 7688 | -11, 0112 | 50, 3501  | 211, 3448 | InChI=1S/C12H7N3O/c16-10-3-1-2-7-4-5-13-9(7)6-8-11-12(8)15(10)14-11/h1-6, 13H/b3-1-, 7-2-, 9-6+              |
| <b>r1-30</b>  |    | 13, 6228 | 130, 0755 | -13, 6869 | 59, 2201  | 211, 6549 | InChI=1S/C12H7N3O/c16-10-3-1-2-7-4-5-13-12(7)14-15-9-6-8(9)11(10)15/h1-6H, (H, 13, 14)/b3-1-, 7-2-           |
| <b>H1-26</b>  |    | 3, 0129  | 30, 4782  | -1, 7338  | 163, 8402 | 212, 1507 | InChI=1S/C12H7N3O/c16-10-3-1-2-8-7-4-5-13-11(7)9-6-15(10)12(8)14-9/h1-6, 13H                                 |
| <b>r-50</b>   |    | 18, 2604 | 138, 7853 | -13, 8047 | 50, 6023  | 212, 3206 | InChI=1S/C12H7N3O/c16-12-10-8(9-6-15(9)10)3-1-2-7-4-5-13-11(7)14-12/h1-6H, (H, 13, 14, 16)                   |
| <b>I-60</b>   |    | 11, 1663 | 149, 5885 | 26, 2881  | 33, 7741  | 212, 3763 | InChI=1S/C12H7N3O/c16-12-10-7-6-8-9(2-4-13-8)15(11(7)10)5-1-3-14-12/h1-6, 13H/b5-1-, 14-3+                   |
| <b>s11-7</b>  |    | 7, 2525  | 79, 8439  | -3, 4351  | 102, 8563 | 212, 4776 | InChI=1S/C12H7N3O/c16-12-8-6-15(12)9-3-1-2-7-4-5-13-10(7)11(8)14-9/h1-6, 13H/b2-1-, 3-1-, 7-2-, 9-3+, 11-10+ |
| <b>A2-25</b>  |    | 2, 6093  | 41, 1356  | -1, 8464  | 152, 18   | 212, 5822 | InChI=1S/C12H7N3O/c16-12-10-9-6-15(12)11-8(3-5-14-11)7(9)2-1-3-13-10/h1-6, 14H                               |
| <b>s11-12</b> |    | 5, 0499  | 72, 3172  | -3, 9054  | 120, 8153 | 212, 5874 | InChI=1S/C12H7N3O/c16-12-9-6-15(12)11-8(14-9)3-1-2-7-4-5-13-10(7)11/h1-6, 13H                                |
| <b>X-37</b>   |   | 5, 2930  | 143, 5597 | -1, 2149  | 48, 0688  | 212, 8026 | InChI=1S/C12H7N3O/c16-12-10-9-6-7(2-1-4-14-15(9)12)8-3-5-13-11(8)10/h1-6, 13H/b2-1-, 14-4-                   |
| <b>B-123</b>  |  | 7, 5545  | 136, 6673 | -7, 2378  | 63, 1012  | 212, 9245 | InChI=1S/C12H7N3O/c16-12-8(7-3-4-13-11(7)12)2-1-5-15-9-6-10(15)14-9/h1-6, 13H/b5-1-, 8-2-                    |
| <b>G1-83</b>  |  | 4, 8075  | 61, 8324  | -1, 2756  | 127, 5212 | 212, 9374 | InChI=1S/C12H7N3O/c16-9-3-1-2-8-7-4-5-13-10(7)12-11(9)14-6-15(8)12/h1-6, 13H/b2-1-, 8-2-                     |
| <b>s11-28</b> |  | 17, 2082 | 168, 4311 | -10, 0486 | 11, 566   | 213, 0093 | InChI=1S/C12H7N3O/c16-12-9-6-15(9)11-8(14-12)3-1-2-7-4-5-13-10(7)11/h1-6, 13H                                |
| <b>B-199</b>  |  | 2, 3608  | 143, 1694 | -1, 2461  | 51, 5418  | 213, 1124 | InChI=1S/C12H7N3O/c16-12-8-2-1-5-15(12)9-6-14-11(9)10-7(8)3-4-13-10/h1-6, 13H                                |
| <b>I-108</b>  |  | 15, 8954 | 147, 6461 | -12, 3373 | 36, 1603  | 213, 1998 | InChI=1S/C12H7N3O/c16-12-11-8-6-7(8)10-9(2-4-13-10)15(11)5-1-3-14-12/h1-6, 13H                               |
| <b>X22-5</b>  |  | 13, 5548 | 167, 4098 | -8, 5998  | 24, 3772  | 213, 4219 | InChI=1S/C12H7N3O/c16-10-6-7-11-8(3-5-14-11)13-4-1-2-9-12(7)15(9)10/h1-6, 14H/b2-1-, 13-4-                   |
| <b>A-153</b>  |  | 50, 9257 | 167, 9063 | -28, 83   | 11, 9843  | 213, 4331 | InChI=1S/C12H7N3O/c16-12-10-11(12)15(10)5-1-2-8-7-3-4-13-9(7)6-14-8/h1-6, 13H/b5-1-, 8-2-                    |
| <b>G-30</b>   |  | 7, 3067  | 142, 7552 | 0, 102    | 48, 7656  | 214, 0817 | InChI=1S/C12H7N3O/c16-12-9-3-1-2-8-7-4-5-13-10(7)11(8)15(12)6-14-9/h1-6, 13H/b2-1-, 9-3+                     |
| <b>H-86</b>   |  | 3, 6126  | 36, 5293  | -0, 2964  | 149, 7942 | 214, 2306 | InChI=1S/C12H7N3O/c16-12-9-6-7-2-1-3-10(15(7)14-9)8-4-5-13-11(8)12/h1-6, 13H                                 |
| <b>B-204</b>  |  | 3, 3999  | 28, 8555  | -1, 6264  | 167, 8730 | 214, 2956 | InChI=1S/C12H7N3O/c16-12-11-10-8(3-4-13-10)7-2-1-5-15(12)9(7)6-14-11/h1-6, 13H                               |



|               |                                                                                     |         |          |          |          |          |                                                                                                                     |
|---------------|-------------------------------------------------------------------------------------|---------|----------|----------|----------|----------|---------------------------------------------------------------------------------------------------------------------|
| <b>p11-21</b> | 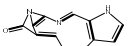   | 15.864  | 175.8799 | -10.8751 | 17.7359  | 214.5693 | InChI=1S/C12H7N3O/c16-12-8-3-1-2-7-4-5-13-9(7)6-14-11-10(8)15(11)12/h1-6,13H/b2-1-,3-1-,7-2-,8-3-,9-6+,14-6+,14-11- |
| <b>H-3</b>    |    | 19.2266 | 275.0135 | -21.4631 | 41.071   | 214.8764 | InChI=1S/C12H7N3O/c16-12-11-9(12)5-1-3-13-10-7-6-8(7)10/h1-6,14H/b5-1-,13-3-                                        |
| <b>G-9</b>    |    | 5.3458  | 51.7549  | 0.0592   | 139.3191 | 215.0071 | InChI=1S/C12H7N3O/c16-11-9-3-1-2-7-8-4-5-13-12(8)15(6-14-9)10(7)11/h1-6,13H                                         |
| <b>X-16</b>   |    | 5.2752  | 108.8523 | -2.4107  | 86.7488  | 215.3045 | InChI=1S/C12H7N3O/c16-12-9-6-7-2-1-4-14-15(12)11(9)10-8(7)3-5-13-10/h1-6,13H/b2-1-,14-4-                            |
| <b>H1-20</b>  |    | 4.3423  | 56.264   | -0.8856  | 142.0287 | 215.4433 | InChI=1S/C12H7N3O/c16-10-3-1-2-7-8-4-5-13-11(8)15-9(10)6-14-12(7)15/h1-6,13H/b3-1-,7-2-                             |
| <b>B-184</b>  |    | 2.1380  | 36.7230  | -1.2350  | 160.1929 | 215.7348 | InChI=1S/C12H7N3O/c16-12-9-6-14-11(12)10-7(3-4-13-10)8-2-1-5-15(8)9/h1-6,13H                                        |
| <b>B-237</b>  |    | 4.9748  | 33.6539  | -0.8207  | 147.7988 | 215.8487 | InChI=1S/C12H7N3O/c16-12-10-8(3-4-13-10)7-2-1-5-15-6-9(7)11(12)14-15/h1-6,13H                                       |
| <b>x4-45</b>  |    | 4.311   | 81.5439  | -3.1881  | 117.5249 | 215.8899 | InChI=1S/C12H7N3O/c16-12-9-8-3-1-2-7-4-5-13-10(7)11(9)15(12)6-14-8/h1-6,13H/b2-1-,3-1-,7-2-,8-3+,11-10-             |
| <b>X-6</b>    |   | 53.4083 | 161.0656 | -28.2317 | 12.0036  | 215.9809 | InChI=1S/C12H7N3O/c16-11-9-10(11)15(9)12-8(3-5-14-12)7-2-1-4-13-6-7/h1-6,14H                                        |
| <b>H1-56</b>  |  | 4.6419  | 119.2208 | -0.9384  | 74.9623  | 216.0661 | InChI=1S/C12H7N3O/c16-10-3-1-2-7-8-4-5-13-11(8)12-9(7)6-15(10)14-12/h1-6,13H/b3-1-,7-2-                             |
| <b>I-106</b>  |  | 19.9866 | 107.8697 | -25.0051 | 86.6182  | 216.3031 | InChI=1S/C12H7N3O/c16-12-10-9(2-4-13-10)15(5-1-3-14-12)11-7-6-8(7)11/h1-6,13H/b5-1-,14-3+                           |
| <b>H-90</b>   |  | 5.2782  | 37.1637  | -0.9237  | 144.2541 | 216.3191 | InChI=1S/C12H7N3O/c16-11-10-8(4-5-13-10)9-3-1-2-7-6-15(9)12(11)14-7/h1-6,13H                                        |
| <b>B-215</b>  |  | 5.9125  | 87.0923  | -2.5727  | 112.9176 | 216.4565 | InChI=1S/C12H7N3O/c16-12-8-6-15(12)5-1-2-9-7-3-4-13-10(7)11(8)14-9/h1-6,13H/b5-1-,9-2-                              |
| <b>n-189</b>  |  | 3.8995  | 35.705   | -2.3341  | 145.6413 | 216.4998 | InChI=1S/C12H7N3O/c16-12-11-8(6-14-12)7-2-1-5-15(11)9-3-4-13-10(7)9/h1-6,13H                                        |
| <b>I-81</b>   |  | 22.6642 | 155.3525 | -13.7035 | 32.7432  | 216.7913 | InChI=1S/C12H7N3O/c16-11-7-6-8(7)12-14-3-1-5-15(12)9-2-4-13-10(9)11/h1-6,13H                                        |
| <b>r1-35</b>  |  | 18.2206 | 148.6619 | -14.6596 | 41.2837  | 216.86   | InChI=1S/C12H7N3O/c16-9-3-1-2-7-4-5-13-11(7)14-12-10(9)8-6-15(8)12/h1-6H, (8,13,14)/b3-1-,7-2-                      |
| <b>x6-42</b>  |  | 18.022  | 129.0963 | -10.3151 | 46.0087  | 216.9411 | InChI=1S/C12H7N3O/c16-10-3-1-2-7-4-5-13-8(7)6-9-11-14-12(10)15(9)11/h1-6,13H/b3-1-,7-2-,8-6+                        |
| <b>x7-22</b>  |  | 19.494  | 127.594  | -11.0706 | 54.7524  | 216.9785 | InChI=1S/C12H7N3O/c16-9-3-1-2-7-4-5-13-10(7)12-14-6-8-11(9)15(8)12/h1-6,13H/b3-1-,7-2-,12-10+                       |
| <b>p1-3</b>   |  | 13.2792 | 130.404  | -11.8999 | 72.5279  | 217.1502 | InChI=1S/C12H7N3O/c16-10-3-1-2-7-4-5-13-11(7)12-14-8-6-9(8)15(10)12/h1-6,13H/b3-1-,7-2-,12-11+                      |

|               |                                                                                     |         |          |          |          |          |                                                                                                          |
|---------------|-------------------------------------------------------------------------------------|---------|----------|----------|----------|----------|----------------------------------------------------------------------------------------------------------|
| <b>q1-34</b>  |    | 5.414   | 52.1131  | -5.9233  | 150.3894 | 217.2416 | InChI=1S/C12H7N3O/c16-12-11-7(4-5-13-11)2-1-3-9-8-6-10(14-8)15(9)12/h1-6,13H/b2-1-,9-3-                  |
| <b>r-7</b>    |    | 4.8695  | 56.2857  | -6.0286  | 148.5868 | 217.2528 | InChI=1S/C12H7N3O/c16-11-8-6-10(11)15-9(8)3-1-2-7-4-5-13-12(7)14-15/h1-6H, (H,13,14)/b3-1-,7-2-          |
| <b>x9-18</b>  |    | 7.8384  | 129.4834 | -6.8365  | 62.6153  | 217.3212 | InChI=1S/C12H7N3O/c16-12-9-7(4-5-13-9)2-1-3-8-6-14-15-10(8)11(12)15/h1-6,13H/b2-1-,8-3-                  |
| <b>q1-43</b>  |    | 16.0301 | 126.4601 | -12.589  | 60.3424  | 217.3597 | InChI=1S/C12H7N3O/c16-12-10-7(4-5-13-10)2-1-3-8-9-6-15(9)14-11(8)12/h1-6,13H/b2-1-,8-3-                  |
| <b>o-158</b>  |    | 3.8951  | 65.3956  | -2.1932  | 143.8704 | 217.4127 | InChI=1S/C12H7N3O/c16-12-7-2-1-5-15(12)10-3-4-13-11(10)9-6-8(7)14-9/h1-6,13H                             |
| <b>H-40</b>   |    | 2.947   | 25.0821  | -0.6278  | 162.7278 | 217.5138 | InChI=1S/C12H7N3O/c16-10-6-7-2-1-3-9-8-4-5-13-11(8)12(10)14-15(7)9/h1-6,13H                              |
| <b>H-10</b>   |    | 18.6535 | 144.7436 | -14.2666 | 35.8553  | 217.5173 | InChI=1S/C12H7N3O/c16-9-2-1-4-13-7-3-5-14-11(7)10-8-6-15(8)12(9)10/h1-6,14H/b2-1-,13-4+                  |
| <b>A-65</b>   |    | 4.4854  | 82.4943  | -0.3995  | 99.4697  | 217.6143 | InChI=1S/C12H7N3O/c16-12-10-7-2-1-5-15(12)14-6-9(10)11-8(7)3-4-13-11/h1-6,13H                            |
| <b>x4-53</b>  |   | 4.4424  | 61.1269  | -2.736   | 130.9901 | 217.6354 | InChI=1S/C12H7N3O/c16-12-8-3-1-2-7-4-5-13-10(7)11-9(8)6-14-15(11)12/h1-6,13H/b2-1-,3-1-,7-2-,8-3-,11-10- |
| <b>H-98</b>   |  | 7.242   | 72.2202  | -2.6825  | 126.3838 | 217.8616 | InChI=1S/C12H7N3O/c16-12-11-8(4-5-13-11)9-3-1-2-7-6-10(14-9)15(7)12/h1-6,13H/b2-1-,3-1-,7-2-,9-3-        |
| <b>r1-25</b>  |  | 14.2187 | 139.1267 | -9.0182  | 46.7141  | 218.3283 | InChI=1S/C12H7N3O/c16-9-3-1-2-7-4-5-13-11(7)14-12-10-8(9)6-15(10)12/h1-6H, (H,13,14)/b3-1-,7-2-          |
| <b>q-57</b>   |  | 11.895  | 121.8665 | -1.3248  | 75.8599  | 218.4648 | InChI=1S/C12H7N3O/c16-12-8-3-1-2-7-4-5-13-10(7)9-6-14-11(8)15(9)12/h1-6,13H/b2-1-,3-1-,7-2-,8-3-,10-9+   |
| <b>q11-36</b> |  | 4.6024  | 64.9014  | -2.6906  | 127.0552 | 218.4982 | InChI=1S/C12H7N3O/c16-10-6-8-9-3-1-2-7-4-5-13-11(7)12(8)14-15(9)10/h1-6,13H/b2-1-,9-3+                   |
| <b>r1-33</b>  |  | 17.6288 | 148.2085 | -14.2203 | 39.9018  | 218.7731 | InChI=1S/C12H7N3O/c16-9-3-1-2-7-4-5-13-12(7)14-10-8-6-15(8)11(9)10/h1-6H, (H,13,14)/b3-1-,7-2-           |
| <b>p1-50</b>  |  | 16.8053 | 130.3852 | -14.9644 | 69.4028  | 218.8639 | InChI=1S/C12H7N3O/c16-9-3-1-2-7-4-5-13-11(7)10-8-6-15(8)12(10)14-9/h1-6,13H/b3-1-,7-2-,11-10+,14-12+     |
| <b>A-201</b>  |  | 4.5481  | 102.8645 | -0.4156  | 101.6327 | 218.9168 | InChI=1S/C12H7N3O/c16-12-11-9-7(8-3-4-13-10(8)9)2-1-5-15(12)6-14-11/h1-6,13H/b5-1-,7-2-,11-9-            |
| <b>X22-58</b> |  | 18.8506 | 149.248  | -14.0842 | 32.5856  | 218.9386 | InChI=1S/C12H7N3O/c16-12-10-8(15-6-9(10)15)2-1-4-13-7-3-5-14-11(7)12/h1-6,14H/b2-1-,13-4+                |
| <b>q1-1</b>   |  | 13.307  | 175.3259 | -12.9425 | 27.4648  | 218.9829 | InChI=1S/C12H7N3O/c16-12-11-7(4-5-13-11)2-1-3-10-8-6-9(8)14-15(10)12/h1-6,13H/b2-1-,10-3-                |
| <b>r-20</b>   |  | 30.3949 | 152.4808 | -16.8526 | 36.3121  | 219.1508 | InChI=1S/C12H7N3O/c16-12-8-6-15(12)10(8)9-3-1-2-7-4-5-13-11(7)14-9/h1-6H, (H,13,14)/b10-9-               |

|               |                                                                                     |         |          |          |          |          |                                                                                                   |
|---------------|-------------------------------------------------------------------------------------|---------|----------|----------|----------|----------|---------------------------------------------------------------------------------------------------|
| <b>H1-35</b>  | 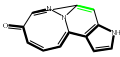   | 8.6483  | 83.4488  | -1.7835  | 99.7658  | 219.3646 | InChI=1S/C12H7N3O/c16-11-3-1-2-9-7-4-5-13-8(7)6-10-12(11)14-15(9)10/h1-6,13H/b3-1-,9-2-           |
| <b>X22-52</b> |    | 4.543   | 51.7791  | -5.6918  | 159.745  | 219.5177 | InChI=1S/C12H7N3O/c16-11-7-6-10(11)15-9(7)2-1-4-13-8-3-5-14-12(8)15/h1-6,14H/b2-1-,13-4-          |
| <b>A-86</b>   |    | 13.3463 | 162.4563 | -6.7739  | 20.1917  | 219.6635 | InChI=1S/C12H7N3O/c16-12-10-7(3-4-13-10)8-2-1-5-15-9(6-14-12)11(8)15/h1-6,13H/b4-6-               |
| <b>A-143</b>  |    | 13.3485 | 162.4604 | -6.7754  | 20.1829  | 219.6635 | InChI=1S/C12H7N3O/c16-12-10-7(3-4-13-10)8-2-1-5-15-9(6-14-12)11(8)15/h1-6,13H/b4-6-               |
| <b>F-9</b>    |    | 18.8514 | 193.4215 | -14.6965 | 15.6642  | 219.6932 | InChI=1S/C12H7N3O/c16-11-9(15-6-10(11)15)3-1-2-8-7-4-5-13-12(7)14-8/h1-6H, (H, 13, 14)/b2-1-,9-3- |
| <b>o-123</b>  |    | 15.6464 | 145.7608 | -12.0142 | 38.0359  | 219.9552 | InChI=1S/C12H7N3O/c16-11-7-6-8(7)14-12-10(3-4-13-12)15-5-1-2-9(11)15/h1-6,13H/b4-8-               |
| <b>x6-6</b>   |    | 29.0043 | 129.3372 | -23.0957 | 72.4015  | 219.9775 | InChI=1S/C12H7N3O/c16-9-3-1-2-7-4-5-13-8(7)6-15(9)12-10-11(12)14-10/h1-6,13H/b3-1-,7-2-,8-6+      |
| <b>C-37</b>   |    | 4.6772  | 55.4682  | -1.0003  | 144.9773 | 220.0923 | InChI=1S/C12H7N3O/c16-9-6-10-13-4-1-2-7-8-3-5-14-12(8)15(10)11(7)9/h1-6,14H/b2-1-,13-4-           |
| <b>H1-33</b>  |   | 3.6828  | 88.5684  | -0.6983  | 108.5312 | 220.1362 | InChI=1S/C12H7N3O/c16-10-3-1-2-7-6-9-11(10)14-15(9)12-8(7)4-5-13-12/h1-6,13H/b3-1-,7-2+           |
| <b>n-119</b>  |  | 3.8495  | 33.1956  | -2.3513  | 155.4802 | 220.2087 | InChI=1S/C12H7N3O/c16-9-6-14-12-10(9)7-2-1-5-15(12)8-3-4-13-11(7)8/h1-6,13H                       |
| <b>x4-35</b>  |  | 3.8875  | 54.7172  | -3.6095  | 146.2687 | 220.2441 | InChI=1S/C12H7N3O/c16-12-8-6-14-15(12)9-3-1-2-7-4-5-13-11(7)10(8)9/h1-6,13H                       |
| <b>q11-19</b> |  | 5.1089  | 66.8269  | -3.2904  | 129.3441 | 220.6268 | InChI=1S/C12H7N3O/c16-12-8-6-9-11-7(4-5-13-11)2-1-3-10(8)15(12)14-9/h1-6,13H/b2-1-,10-3-          |
| <b>H1-65</b>  |  | 3.2289  | 31.6704  | -1.6311  | 163.644  | 220.7408 | InChI=1S/C12H7N3O/c16-11-3-1-2-9-7-4-5-13-12(7)8-6-10(11)15(9)14-8/h1-6,13H                       |
| <b>E-21</b>   |  | 3.6303  | 77.7746  | -1.8124  | 129.7378 | 220.7776 | InChI=1S/C12H7N3O/c16-12-8-6-10-7(4-5-13-10)9-2-1-3-11(8)15(12)14-9/h1-6,13H/b8-6+                |
| <b>p1-12</b>  |  | 5.0759  | 48.5427  | -5.8702  | 161.2696 | 220.9824 | InChI=1S/C12H7N3O/c16-10-3-1-2-7-4-5-13-11(7)12-8-6-9(14-8)12/h1-6,13H/b3-1-,7-2-,12-11+          |
| <b>q-43</b>   |  | 2.5072  | 69.2206  | -2.0999  | 148.8891 | 221.0597 | InChI=1S/C12H7N3O/c16-10-6-8-11-7(4-5-13-11)2-1-3-9-14-12(8)15(9)10/h1-6,13H/b2-1-,9-3-           |
| <b>X22-6</b>  |  | 30.3767 | 152.0426 | -16.5553 | 36.4732  | 221.0696 | InChI=1S/C12H7N3O/c16-12-8-6-15(12)11(8)7-2-1-4-13-9-3-5-14-10(7)9/h1-6,14H/b11-7-                |
| <b>C-19</b>   |  | 31.0585 | 153.2240 | -16.9772 | 34.5824  | 221.1188 | InChI=1S/C12H7N3O/c16-12-9-6-15(12)10(9)7-2-1-4-13-11-8(7)3-5-14-11/h1-6,14H/b10-7-               |
| <b>n-117</b>  |  | 3.84    | 33.0644  | -2.3236  | 153.659  | 221.1803 | InChI=1S/C12H7N3O/c16-9-6-14-11-7-2-1-5-15(12)9(11)8-3-4-13-10(7)8/h1-6,13H                       |

|                |                                                                                     |          |           |           |           |           |                                                                                                         |
|----------------|-------------------------------------------------------------------------------------|----------|-----------|-----------|-----------|-----------|---------------------------------------------------------------------------------------------------------|
| <b>k1-19</b>   |    | 15, 8187 | 135, 1096 | -13, 4446 | 49, 3834  | 221, 6505 | InChI=1S/C12H7N3O/c16-12-10-8(2-4-14-10)13-3-1-5-15-9-6-7(9)11(12)15/h1-6, 14H/b5-1-, 13-3+             |
| <b>H-30</b>    |    | 5, 1027  | 50, 6598  | -0, 1735  | 140, 1156 | 221, 7946 | InChI=1S/C12H7N3O/c16-12-7-2-1-3-9-8-4-5-13-10(8)11(14-12)15(9)6-7/h1-6, 13H                            |
| <b>B-165</b>   |    | 4, 9581  | 91, 1158  | -0, 4099  | 101, 5544 | 222, 0292 | InChI=1S/C12H7N3O/c16-12-10-8(3-4-13-10)7-2-1-5-15-9(6-7)11(12)14-15/h1-6, 13H                          |
| <b>I-16</b>    |    | 4, 9812  | 80, 7523  | -4, 015   | 136, 6466 | 222, 2649 | InChI=1S/C12H7N3O/c16-10-6-7-9-2-1-4-13-8-3-5-14-11(8)12(7)15(9)10/h1-6, 14H/b4-1-, 9-2-, 12-11-, 13-8- |
| <b>s11-6</b>   |    | 4, 3319  | 73, 0847  | -2, 6883  | 123, 3667 | 222, 4647 | InChI=1S/C12H7N3O/c16-12-9-6-8-3-1-2-7-4-5-13-10(7)11(9)15(12)14-8/h1-6, 13H/b3-1-, 7-2-, 11-10-        |
| <b>r-36</b>    |    | 5, 3987  | 51, 5376  | -4, 9086  | 153, 9048 | 222, 7868 | InChI=1S/C12H7N3O/c16-10-6-9-8-3-1-2-7-4-5-13-12(7)14-15(9)11(8)10/h1-6H, (H, 13, 14)/b3-1-, 7-2-       |
| <b>r1-38</b>   |    | 11, 4845 | 149, 9043 | -9, 4824  | 53, 3034  | 222, 854  | InChI=1S/C12H7N3O/c16-9-3-1-2-7-4-5-13-12(7)14-8-6-15-10(8)11(9)15/h1-6H, (H, 13, 14)/b3-1-, 7-2-       |
| <b>r-52</b>    |    | 13, 2229 | 127, 3957 | -8, 6257  | 69, 7981  | 222, 9527 | InChI=1S/C12H7N3O/c16-10-6-9-8-3-1-2-7-4-5-13-12(7)14-15(10)11(8)9/h1-6H, (H, 13, 14)/b3-1-, 7-2-       |
| <b>x5-43</b>   |   | 5, 4419  | 81, 245   | -5, 0234  | 132, 815  | 222, 9734 | InChI=1S/C12H7N3O/c16-12-9-6-8-3-1-2-7-4-5-13-10(7)14-11(9)15(8)12/h1-6H, (H, 13, 14)                   |
| <b>H1-21</b>   |  | 16, 2589 | 152, 9878 | 1, 3982   | 20, 8719  | 223, 1595 | InChI=1S/C12H7N3O/c16-10-3-1-2-7-8-4-5-13-11(8)15-6-9(10)14-12(7)15/h1-6, 13H/b3-1-, 7-2-               |
| <b>H11-102</b> |  | 15, 9252 | 160, 2903 | -11, 0574 | 35, 8871  | 223, 2278 | InChI=1S/C12H7N3O/c16-12-10-6-15(10)11-8(4-5-13-11)7-2-1-3-9(7)14-12/h1-6, 13H/b14-9-                   |
| <b>X22-57</b>  |  | 19, 7876 | 147, 8836 | -14, 219  | 34, 5736  | 223, 2283 | InChI=1S/C12H7N3O/c16-12-10-8(3-5-14-10)13-4-1-2-7-9-6-15(9)11(7)12/h1-6, 14H/b2-1-, 13-4+              |
| <b>q11-40</b>  |  | 10, 0888 | 107, 1905 | -1, 6303  | 82, 1668  | 223, 392  | InChI=1S/C12H7N3O/c16-10-6-9-12-11-7(4-5-13-11)2-1-3-8(10)15(9)14-12/h1-6, 13H/b2-1-, 8-3-              |
| <b>D-18</b>    |  | 4, 2543  | 57, 2443  | -1, 1156  | 148, 2987 | 223, 4708 | InChI=1S/C12H7N3O/c16-10-6-8-12-11-7(3-5-14-11)9(15(10)12)2-1-4-13-8/h1-6, 14H/b2-1-, 13-4+             |
| <b>B-107</b>   |  | 4, 0510  | 67, 8195  | -1, 9917  | 144, 7063 | 224, 0918 | InChI=1S/C12H7N3O/c16-12-8-2-1-5-15(12)10-6-9(14-10)11-7(8)3-4-13-11/h1-6, 13H                          |
| <b>n-191</b>   |  | 3, 9616  | 36, 6296  | -2, 3945  | 153, 6172 | 224, 0984 | InChI=1S/C12H7N3O/c16-12-10-7-2-1-5-15(9(10)6-14-12)8-3-4-13-11(7)8/h1-6, 13H                           |
| <b>X23-16</b>  |  | 4, 1559  | 80, 522   | -3, 8657  | 131, 8964 | 224, 1003 | InChI=1S/C12H7N3O/c16-12-9-7-2-1-4-13-8-3-5-14-10(8)11(9)15(12)6-7/h1-6, 14H/b2-1-, 13-4-               |
| <b>I1-29</b>   |  | 5, 5418  | 77, 7291  | -3, 111   | 134, 811  | 224, 126  | InChI=1S/C12H7N3O/c16-12-7-6-8-10(7)11-9(2-4-14-11)15(12)5-1-3-13-8/h1-6, 14H/b5-1-, 13-3+              |
| <b>p1-55</b>   |  | 5, 3263  | 55, 3768  | -5, 2303  | 158, 2471 | 224, 1305 | InChI=1S/C12H7N3O/c16-9-3-1-2-7-4-5-13-11(7)10-8-6-14-12(10)15(8)9/h1-6, 13H/b3-1-, 7-2-, 11-10+        |

|                |                                                                                     |          |           |           |           |           |                                                                                                                    |
|----------------|-------------------------------------------------------------------------------------|----------|-----------|-----------|-----------|-----------|--------------------------------------------------------------------------------------------------------------------|
| <b>G1-110</b>  | 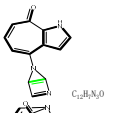   | 18, 9291 | 126, 3952 | -12, 8274 | 66, 4924  | 224, 2216 | InChI=1S/C12H7N3O/c16-10-3-1-2-8(7)-4-5-13-11(7)1015-9-6-14-12(9)15/h1-6, 13H                                      |
| <b>B-154</b>   |    | 4, 3759  | 90, 1342  | -2, 1721  | 118, 1903 | 224, 5032 | InChI=1S/C12H7N3O/c16-12-9-6-7-2-1-5-15(12)11(9)14-10-8(7)3-4-13-10/h1-6, 13H/b5-1-, 7-2+                          |
| <b>q1-3</b>    |    | 13, 1848 | 132, 9094 | -12, 3746 | 73, 9098  | 224, 5108 | InChI=1S/C12H7N3O/c16-12-11-7(4-5-13-11)2-1-3-10-14-8-6-9(8)15(10)12/h1-6, 13H/b2-1-, 10-3-                        |
| <b>r1-40</b>   |    | 17, 5042 | 138, 3289 | -10, 314  | 48, 4042  | 224, 6111 | InChI=1S/C12H7N3O/c16-10-3-1-2-7-4-5-13-11(7)14-12-9-6-8(10)15(9)12/h1-6H, (H, 13, 14)/b3-1-, 7-2-                 |
| <b>k1-14</b>   |    | 36, 318  | 157, 2218 | -24, 7239 | 23, 9104  | 224, 628  | InChI=1S/C12H7N3O/c16-9-6-7-11-12(7)15(11)5-1-3-13-8-2-4-14-10(8)9/h1-6, 14H/b5-1-, 7-6-, 13-3-                    |
| <b>B-136</b>   |    | 6, 0121  | 32, 4184  | -2, 4450  | 157, 0102 | 224, 7193 | InChI=1S/C12H7N3O/c16-12-10-6-9-7(3-4-13-9)8-2-1-5-15(11)8)14-12/h1-6, 13H                                         |
| <b>q11-66</b>  |   | 13, 1896 | 95, 972   | -2, 4409  | 97, 8268  | 224, 7593 | InChI=1S/C12H7N3O/c16-12-8-3-1-2-7-4-5-13-10(7)11-14-6-9(8)15(11)12/h1-6, 13H/b2-1-, 3-1-, 7-2-, 8-3-, 11-10+      |
| <b>s11-59</b>  |  | 9, 7831  | 111, 9354 | -1, 5056  | 78, 554   | 224, 9246 | InChI=1S/C12H7N3O/c16-10-6-9-8-3-1-2-7-4-5-13-11(7)12(10)15(9)14-8/h1-6, 13H/b3-1-, 7-2-, 12-11+                   |
| <b>x8-20</b>   |  | 17, 0047 | 170, 2675 | -15, 4379 | 21, 4422  | 224, 9869 | InChI=1S/C12H7N3O/c16-8-3-1-2-7-4-5-13-11(7)14-12-10-9(6-8)15(10)12/h1-6H, (H, 13, 14)/b3-1-, 7-2-, 9-6-           |
| <b>11-9</b>    |  | 17, 3722 | 136, 7354 | -10, 3875 | 48, 4526  | 225, 0473 | InChI=1S/C12H7N3O/c16-10-2-1-4-13-7-3-5-14-11(7)12-9-6-8(10)15(9)12/h1-6, 14H/b2-1-, 13-4+                         |
| <b>G1-86</b>   |  | 7, 0381  | 121, 2254 | -1, 5155  | 77, 9218  | 225, 1296 | InChI=1S/C12H7N3O/c16-10-3-1-2-7-8-4-5-13-11(8)12-9(7)6-14-15(10)12/h1-6, 13H/b3-1-, 7-2-                          |
| <b>p-16</b>    |  | 6, 2096  | 141, 2172 | -3, 7805  | 68, 0772  | 225, 2802 | InChI=1S/C12H7N3O/c16-12-8-6-9-7(4-5-13-9)2-1-3-10-11(8)14-15(10)12/h1-6, 13H/b2-1-, 8-6-, 10-3+                   |
| <b>A-47</b>    |  | 4, 1174  | 102, 7829 | -0, 5002  | 108, 199  | 225, 3988 | InChI=1S/C12H7N3O/c16-12-9-6-14-15(12)5-1-2-7-8-3-4-13-11(8)10(7)9/h1-6, 13H/b5-1-, 7-2-, 10-9+                    |
| <b>x9-24</b>   |  | 16, 0348 | 132, 0522 | -9, 5805  | 66, 3497  | 225, 4263 | InChI=1S/C12H7N3O/c16-12-10-7(4-5-13-10)2-1-3-9-14-6-8-11(12)15(8)9/h1-6, 13H/b2-1-, 9-3-                          |
| <b>H11-161</b> |  | 18, 6078 | 198, 5772 | -14, 2783 | 14, 7769  | 225, 4585 | InChI=1S/C12H7N3O/c16-12-8(7-4-5-13-11(7)12)2-1-3-9-14-10-6-15(9)10/h1-6, 13H/b3-1-, 8-2-                          |
| <b>X23-29</b>  |  | 53, 4677 | 169, 1962 | -28, 2102 | 12, 3401  | 225, 6032 | InChI=1S/C12H7N3O/c16-12-10-11(12)15(10)6-7-2-1-4-13-8-3-5-14-9(7)8/h1-6, 14H/b7-6-                                |
| <b>p-8</b>     |  | 4, 0762  | 145, 2442 | -3, 2705  | 73, 6728  | 225, 7477 | InChI=1S/C12H7N3O/c16-12-11-9-6-8-7(4-5-13-8)2-1-3-10(14-11)15(9)12/h1-6, 13H/b2-1-, 3-1-, 7-2-, 8-6-, 9-6-, 10-3- |
| <b>x7-44</b>   |  | 12, 5996 | 128, 4863 | -7, 0014  | 66, 2986  | 225, 9575 | InChI=1S/C12H7N3O/c16-8-3-1-2-7-4-5-13-9(7)10-12-11(8)15(12)6-14-10/h1-6, 13H/b3-1-, 7-2-, 10-9-                   |
| <b>p1-1</b>    |  | 14, 0734 | 129, 7645 | -12, 7344 | 81, 2317  | 226, 035  | InChI=1S/C12H7N3O/c16-10-3-1-2-7-4-5-13-11(7)12-8-6-9(8)14-15(10)12/h1-6, 13H/b3-1-, 7-2-, 12-11+                  |

|                |  |          |           |           |           |           |                                                                                                       |
|----------------|--|----------|-----------|-----------|-----------|-----------|-------------------------------------------------------------------------------------------------------|
| <b>x9-19</b>   |  | 16, 4595 | 133, 8775 | -9, 824   | 64, 5147  | 226, 0643 | InChI=1S/C12H7N3O/c16-11-9-7(4-5-13-9)2-1-3-8-6-14-12-10(11)15(8)12h1-6,13Hb2-1,8-3-                  |
| <b>G-59</b>    |  | 6, 3399  | 42, 2367  | -2, 0519  | 147, 6577 | 226, 142  | InChI=1S/C12H7N3O/c16-12-10-8-3-1-2-7(6-14-12)15(10)11-9(8)4-5-13-11/h1-6,13H                         |
| <b>x7-27</b>   |  | 7, 7531  | 132, 4495 | -6, 6921  | 69, 5381  | 226, 3537 | InChI=1S/C12H7N3O/c16-9-3-1-2-7-4-5-13-10(7)8-6-14-15-11(8)12(9)15/h1-6,13H/b3-1-,7-2-,10-8+          |
| <b>r-3</b>     |  | 19, 4063 | 141, 7956 | -14, 9835 | 66, 8359  | 226, 3763 | InChI=1S/C12H7N3O/c16-10-8-3-1-2-7-4-5-13-11(7)14-12(8)15-6-9(10)15/h1-6H, (H, 13, 14)                |
| <b>A-55</b>    |  | 5, 9131  | 37, 7618  | -1, 7722  | 149, 4792 | 226, 4694 | InChI=1S/C12H7N3O/c16-12-10-8(3-4-13-10)7-2-1-5-15-11(12)9(7)6-14-15/h1-6,13H                         |
| <b>H11-155</b> |  | 9, 9036  | 68, 8427  | -3, 0007  | 116, 9367 | 226, 4853 | InChI=1S/C12H7N3O/c16-11-6-10-8-2-1-3-9(15(10)14-8)7-4-5-13-12(7)11/h1-6,13H                          |
| <b>G-34</b>    |  | 6, 1938  | 40, 0236  | -1, 9462  | 151, 0178 | 226, 5027 | InChI=1S/C12H7N3O/c16-12-9-3-1-2-7-8-4-5-13-11(8)15(9)10(7)6-14-12/h1-6,13H                           |
| <b>s11-57</b>  |  | 5, 574   | 70, 1601  | -3, 4282  | 133, 1485 | 226, 597  | InChI=1S/C12H7N3O/c16-12-14-9-3-1-2-7-4-5-13-10(7)11-8(9)6-15(11)12/h1-6,13H/b3-1-,7-2-,11-10-        |
| <b>q-8</b>     |  | 4, 1343  | 36, 979   | -3, 0263  | 164, 2574 | 226, 7391 | InChI=1S/C12H7N3O/c16-12-8-6-10-11-7(4-5-13-11)2-1-3-9(12)15(10)14-8/h1-6,13H/b2-1-,9-3-              |
| <b>r-25</b>    |  | 13, 8141 | 151, 4293 | -8, 7211  | 49, 9992  | 227, 0231 | InChI=1S/C12H7N3O/c16-12-8-6-15-9(10(8)15)3-1-2-7-4-5-13-11(7)14-12/h1-6H, (H, 13, 14, 16)/b3-1-,7-2- |
| <b>s11-54</b>  |  | 17, 3772 | 184, 2837 | -9, 3866  | 11, 943   | 227, 1153 | InChI=1S/C12H7N3O/c16-12-14-8-3-1-2-7-4-5-13-11(7)10(8)9-6-15(9)12/h1-6,13H                           |
| <b>H1-123</b>  |  | 6, 8859  | 110, 963  | 0, 3284   | 91, 466   | 227, 1235 | InChI=1S/C12H7N3O/c16-10-3-1-2-9-7-4-5-13-11(7)15-6-8(10)12(15)14-9/h1-6,13H/b3-1-,9-2-               |
| <b>x6-24</b>   |  | 9, 7612  | 161, 1797 | -8, 1956  | 35, 6092  | 227, 2352 | InChI=1S/C12H7N3O/c16-10-3-1-2-7-4-5-13-8(7)6-9-11-12(10)15(11)14-9/h1-6,13H/b3-1-,7-2-,8-6+          |
| <b>s12-10</b>  |  | 7, 7433  | 86, 5087  | -5, 9751  | 132, 5339 | 227, 3681 | InChI=1S/C12H7N3O/c16-12-10-11-8(14-10)3-1-2-7-4-5-13-9(7)6-15(11)12/h1-6,13H/b3-1-,7-2-,9-6-         |
| <b>n-166</b>   |  | 5, 5398  | 52, 2455  | -0, 0668  | 143, 9665 | 227, 4273 | InChI=1S/C12H7N3O/c16-12-7-2-1-5-15-8-3-4-13-9(8)10(11(12)15)14-6-7/h1-6,13H                          |
| <b>k-31</b>    |  | 15, 2891 | 163, 3559 | -6, 6676  | 29, 9763  | 227, 4451 | InChI=1S/C12H7N3O/c16-9-6-7-10-8(2-4-14-10)13-3-1-5-15-11(7)12(9)15/h1-6,14H/b5-1-,13-3+              |
| <b>p11-12</b>  |  | 13, 1808 | 161, 4249 | -9, 2895  | 39, 4862  | 227, 6249 | InChI=1S/C12H7N3O/c16-12-8-3-1-2-7-4-5-13-9(7)6-14-15-10(8)11(12)15/h1-6,13H/b2-1-,8-3-,14-6+         |
| <b>x5-26</b>   |  | 7, 038   | 155, 9753 | -5, 1464  | 57, 3656  | 227, 6784 | InChI=1S/C12H7N3O/c16-9-6-8-3-1-2-7-4-5-13-12(7)14-15-10(8)11(9)15/h1-6H, (H, 13, 14)/b3-1-,7-2-      |
| <b>p11-1</b>   |  | 42, 9392 | 183, 0573 | -19, 0256 | 12, 6189  | 227, 6851 | InChI=1S/C12H7N3O/c13-12-9-6(4-5-14-9)2-1-3-7-8-10(11(8)16)15(7)12/h1-5,13-14H/b2-1-,7-3-,13-12?      |

|               |                                                                                                              |         |          |          |          |          |                                                                                                |
|---------------|--------------------------------------------------------------------------------------------------------------|---------|----------|----------|----------|----------|------------------------------------------------------------------------------------------------|
| <b>q11-46</b> | 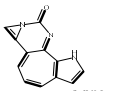<br><chem>C12H9N3O</chem>   | 17.5136 | 184.3489 | -9.4517  | 11.9214  | 227.7688 | InChI=1S/C12H7N3O/c16-12-14-11-8(9-6-15(9)12)3-1-2-7-4-5-13-10(7)11/h1-6,13H                   |
| <b>G1-41</b>  | <br><chem>C12H9N3O</chem>   | 5.4911  | 168.0252 | -3.1772  | 28.2141  | 227.8499 | InChI=1S/C12H7N3O/c16-10-3-1-2-8-7-4-5-13-9(7)6-14-15(8)12(10)15/h1-6,13H                      |
| <b>I-94</b>   | <br><chem>C12H9N3O</chem>   | 3.8015  | 29.2239  | -2.0357  | 168.6921 | 227.883  | InChI=1S/C12H7N3O/c16-12-7-6-8-11(12)15(5-1-3-13-8)9-2-4-14-10(7)9/h1-6,14H                    |
| <b>G-17</b>   | <br><chem>C12H9N3O</chem>   | 5.5686  | 96.0939  | -1.442   | 94.7596  | 228.0403 | InChI=1S/C12H7N3O/c16-12-9-3-1-2-7-8-4-5-13-11(8)15(12)14-6-10(7)9/h1-6,13H                    |
| <b>F-42</b>   | <br><chem>C12H9N3O</chem>   | 5.5017  | 37.1308  | -1.8323  | 163.7139 | 228.0867 | InChI=1S/C12H7N3O/c16-11-6-8-10-3-1-2-9(15(10)11)7-4-5-13-12(7)14-8/h1-6H, (H,13,14)           |
| <b>X-7</b>    | <br><chem>C12H9N3O</chem>   | 53.8869 | 172.2992 | -28.1117 | 10.3475  | 228.1907 | InChI=1S/C12H7N3O/c16-11-9-10(11)15(9)6-7-2-1-4-13-12-8(7)3-5-14-12/h1-6,14H/b7-6-             |
| <b>r-37</b>   | <br><chem>C12H9N3O</chem>   | 6.0171  | 85.9405  | -5.7194  | 128.7364 | 228.2057 | InChI=1S/C12H7N3O/c16-10-6-9-11(10)8-3-1-2-7-4-5-13-12(7)14-15(8)9/h1-6H, (H,13,14)/b3-1-,7-2- |
| <b>p1-43</b>  | <br><chem>C12H9N3O</chem>   | 16.6821 | 125.3602 | -12.2721 | 73.126   | 228.2855 | InChI=1S/C12H7N3O/c16-9-3-1-2-7-4-5-13-11(7)10-8-6-15(8)14-12(9)10/h1-6,13H/b3-1-,7-2-,11-10+  |
| <b>C-10</b>   | <br><chem>C12H9N3O</chem>  | 22.8992 | 169.1708 | -12.2867 | 23.9828  | 228.3335 | InChI=1S/C12H7N3O/c16-11-9-6-15(9)12-8(3-5-14-12)7-2-1-4-13-10(7)11/h1-6,14H                   |
| <b>r1-42</b>  | <br><chem>C12H9N3O</chem> | 13.3497 | 155.283  | -10.2791 | 52.3339  | 228.3955 | InChI=1S/C12H7N3O/c16-9-3-1-2-7-4-5-13-12(7)14-10-6-8-11(9)15(8)10/h1-6H, (H,13,14)/b3-1-,7-2- |
| <b>H11-75</b> | <br><chem>C12H9N3O</chem> | 4.9464  | 97.4025  | -2.0096  | 99.4759  | 228.4168 | InChI=1S/C12H7N3O/c16-12-11-8(4-5-13-11)7-2-1-3-10-9(7)6-15(12)14-10/h1-6,13H                  |
| <b>C-63</b>   | <br><chem>C12H9N3O</chem> | 26.5390 | 127.2790 | -16.4157 | 65.3674  | 228.4815 | InChI=1S/C12H7N3O/c16-12-11-8(3-5-13-11)7-2-1-4-14-15(12)10-6-9(7)10/h1-6,13H/b2-1-,14-4-      |
| <b>X22-41</b> | <br><chem>C12H9N3O</chem> | 6.0202  | 85.1302  | -5.7045  | 132.7059 | 228.5261 | InChI=1S/C12H7N3O/c16-10-6-9-11(10)8-2-1-4-13-7-3-5-14-12(7)15(8)9/h1-6,14H/b2-1-,13-4+        |
| <b>A-172</b>  | <br><chem>C12H9N3O</chem> | 5.695   | 97.3315  | -2.2893  | 113.6657 | 228.9442 | InChI=1S/C12H7N3O/c16-12-9-10-8(3-4-13-10)7-2-1-5-15(12)11(9)14-6-7/h1-6,13H/b5-1-,7-2+        |
| <b>n-150</b>  | <br><chem>C12H9N3O</chem> | 7.8432  | 70.0965  | 0.5004   | 122.2938 | 229.1199 | InChI=1S/C12H7N3O/c16-12-8-2-1-5-15-9-3-4-13-10(9)7(6-14-8)11(12)15/h1-6,13H                   |
| <b>G1-82</b>  | <br><chem>C12H9N3O</chem> | 4.5136  | 57.4885  | -1.2218  | 148.9697 | 229.1829 | InChI=1S/C12H7N3O/c16-10-3-1-2-9-7-4-5-13-11(7)12-8(10)6-14-15(9)12/h1-6,13H/b3-1-,9-2-        |
| <b>X23-15</b> | <br><chem>C12H9N3O</chem> | 5.4255  | 78.0872  | -4.0815  | 140.1474 | 229.3894 | InChI=1S/C12H7N3O/c16-12-8-6-7-2-1-4-13-9-3-5-14-11(9)15(12)10(7)8/h1-6,14H/b2-1-,13-4+        |
| <b>o-148</b>  | <br><chem>C12H9N3O</chem> | 4.1498  | 32.9299  | -0.6266  | 164.9834 | 229.4777 | InChI=1S/C12H7N3O/c16-10-6-8-11-9(3-4-13-11)15-5-1-2-7(10)12(15)14-8/h1-6,13H                  |
| <b>r-33</b>   | <br><chem>C12H9N3O</chem> | 5.2931  | 112.437  | -4.7317  | 112.26   | 229.5214 | InChI=1S/C12H7N3O/c16-12-8-3-1-2-7-4-5-13-11(7)14-9-6-15(12)10(8)9/h1-6H, (H,13,14)/b3-1-,7-2- |

|               |                                                                                     |         |          |          |          |          |                                                                                                 |
|---------------|-------------------------------------------------------------------------------------|---------|----------|----------|----------|----------|-------------------------------------------------------------------------------------------------|
| <b>B-187</b>  |    | 6.3594  | 34.7582  | -1.9179  | 160.8514 | 229.5353 | InChI=1S/C12H7N3O/c16-11-9-6-14-12-8(2-1-5-15(9)12)7-3-4-13-10(7)11/h1-6,13H                    |
|               | $C_{12}H_7N_3O$                                                                     |         |          |          |          |          |                                                                                                 |
| <b>X22-40</b> |    | 4.8741  | 52.6574  | -5.327   | 168.3175 | 229.5603 | InChI=1S/C12H7N3O/c16-10-6-9-7-2-1-4-13-8-3-5-14-12(8)15(9)11(7)10/h1-6,14H/b2-1-,13-4-         |
|               | $C_{12}H_7N_3O$                                                                     |         |          |          |          |          |                                                                                                 |
| <b>B-58</b>   |    | 14.4718 | 171.9581 | -11.8850 | 33.5445  | 230.0207 | InChI=1S/C12H7N3O/c16-12-8-6-9(8)14-15-5-1-2-10(15)7-3-4-13-11(7)12/h1-6,13H/b14-9-             |
|               | $C_{12}H_7N_3O$                                                                     |         |          |          |          |          |                                                                                                 |
| <b>o-176</b>  |    | 9.3388  | 94.2249  | 0.3614   | 102.6403 | 230.0974 | InChI=1S/C12H7N3O/c16-12-8-6-7-2-1-5-15(14-10(7)8)9-3-4-13-11(9)12/h1-6,13H                     |
|               | $C_{12}H_7N_3O$                                                                     |         |          |          |          |          |                                                                                                 |
| <b>B-55</b>   |    | 10.0110 | 82.6531  | -1.5205  | 115.5414 | 230.1907 | InChI=1S/C12H7N3O/c16-9-6-10-14-12-8(2-1-5-15(10)12)7-3-4-13-11(7)9/h1-6,13H/b10-6+             |
|               | $C_{12}H_7N_3O$                                                                     |         |          |          |          |          |                                                                                                 |
| <b>x12-47</b> |    | 19.3885 | 133.1544 | -10.7308 | 59.3525  | 230.2168 | InChI=1S/C12H7N3O/c16-12-11-9-6-8-7(4-5-13-8)2-1-3-10(14-12)15(9)11/h1-6,13H/b3-1-,7-2-,8-6+    |
|               | $C_{12}H_7N_3O$                                                                     |         |          |          |          |          |                                                                                                 |
| <b>o-127</b>  |    | 5.4239  | 43.3885  | -0.496   | 155.9307 | 230.6668 | InChI=1S/C12H7N3O/c16-11-7-6-9-10(3-4-13-9)15-5-1-2-8(11)14-12(7)15/h1-6,13H                    |
|               | $C_{12}H_7N_3O$                                                                     |         |          |          |          |          |                                                                                                 |
| <b>H11-36</b> |    | 6.2618  | 35.3051  | -2.1832  | 162.7873 | 231.0737 | InChI=1S/C12H7N3O/c16-12-9-6-7-2-1-3-10(15(12)14-7)8-4-5-13-11(8)9/h1-6,13H                     |
|               | $C_{12}H_7N_3O$                                                                     |         |          |          |          |          |                                                                                                 |
| <b>G-40</b>   |    | 6.1572  | 41.4521  | -1.7434  | 156.7944 | 231.1564 | InChI=1S/C12H7N3O/c16-9-6-14-10-3-1-2-7-8-4-5-13-12(8)15(10)11(7)9/h1-6,13H                     |
|               | $C_{12}H_7N_3O$                                                                     |         |          |          |          |          |                                                                                                 |
| <b>x7-30</b>  |   | 20.3482 | 132.4381 | -11.3554 | 66.4233  | 231.2409 | InChI=1S/C12H7N3O/c16-9-3-1-2-7-4-5-13-10(7)8-6-14-12-11(9)15(8)12/h1-6,13H/b3-1-,7-2-,10-8+    |
|               | $C_{12}H_7N_3O$                                                                     |         |          |          |          |          |                                                                                                 |
| <b>o-118</b>  |  | 4.7946  | 40.6438  | -0.5251  | 162.3902 | 231.2451 | InChI=1S/C12H7N3O/c16-11-7-2-1-5-15-10-3-4-13-8(10)6-9(11)14-12(7)15/h1-6,13H                   |
|               | $C_{12}H_7N_3O$                                                                     |         |          |          |          |          |                                                                                                 |
| <b>x8-19</b>  |  | 12.6105 | 162.9416 | -9.5     | 44.6892  | 231.2846 | InChI=1S/C12H7N3O/c16-9-3-1-2-7-4-5-13-11(7)14-12-10-8(9)6-15(10)12/h1-6H, (H,13,14)/b3-1-,7-2- |
|               | $C_{12}H_7N_3O$                                                                     |         |          |          |          |          |                                                                                                 |
| <b>G-15</b>   |  | 5.8282  | 39.0806  | -1.8029  | 160.7818 | 231.3071 | InChI=1S/C12H7N3O/c16-10-6-14-12-7-2-1-3-9(10)15(12)11-8(7)4-5-13-11/h1-6,13H                   |
|               | $C_{12}H_7N_3O$                                                                     |         |          |          |          |          |                                                                                                 |
| <b>H-95</b>   |  | 5.3762  | 66.5584  | -3.0319  | 147.1722 | 231.4534 | InChI=1S/C12H7N3O/c16-12-10-8(4-5-13-10)9-3-1-2-7-6-15(12)11(7)14-9/h1-6,13H                    |
|               | $C_{12}H_7N_3O$                                                                     |         |          |          |          |          |                                                                                                 |
| <b>B-167</b>  |  | 4.0089  | 83.5312  | -2.3711  | 131.8013 | 232.0434 | InChI=1S/C12H7N3O/c16-12-10-9-6-7(2-1-5-15(9)12)8-3-4-13-11(8)14-10/h1-6,13H                    |
|               | $C_{12}H_7N_3O$                                                                     |         |          |          |          |          |                                                                                                 |
| <b>F-16</b>   |  | 25.4538 | 145.7628 | -16.7352 | 58.2731  | 232.1061 | InChI=1S/C12H7N3O/c16-12-9-6-7(9)2-1-3-10-8-4-5-13-11(8)14-15(10)12/h1-6H, (H,13,14)/b3-1-,7-2- |
|               | $C_{12}H_7N_3O$                                                                     |         |          |          |          |          |                                                                                                 |
| <b>H1-13</b>  |  | 11.2978 | 201.4482 | -4.407   | 0.2928   | 232.1665 | InChI=1S/C12H7N3O/c16-10-3-1-2-7-8-4-5-13-12(8)15-6-9(15)11(7)14-10/h1-6,13H                    |
|               | $C_{12}H_7N_3O$                                                                     |         |          |          |          |          |                                                                                                 |
| <b>H1-128</b> |  | 26.8766 | 129.5682 | -11.9062 | 72.6757  | 232.1763 | InChI=1S/C12H7N3O/c16-9-3-1-2-7(9)8-4-5-13-12(8)15-10-6-11(15)14-10/h1-6,13H                    |
|               | $C_{12}H_7N_3O$                                                                     |         |          |          |          |          |                                                                                                 |
| <b>H-97</b>   |  | 3.7037  | 34.0406  | -1.1905  | 171.5263 | 232.2515 | InChI=1S/C12H7N3O/c16-12-11-9(4-5-13-11)8-3-1-2-7-6-10(8)14-15(7)12/h1-6,13H                    |
|               | $C_{12}H_7N_3O$                                                                     |         |          |          |          |          |                                                                                                 |



|               |                                                                                     |         |          |          |          |          |                                                                                                         |
|---------------|-------------------------------------------------------------------------------------|---------|----------|----------|----------|----------|---------------------------------------------------------------------------------------------------------|
| <b>o-129</b>  |    | 5.4166  | 111.5226 | -2.3068  | 90.8058  | 232.5158 | InChI=1S/C12H7N3O/c16-12-8-6-7(14-8)11-9(3-4-13-11)15-5-1-2-10(12)15/h1-6,13H                           |
| <b>E-45</b>   |    | 2.6309  | 87.4731  | -1.4917  | 137.3528 | 232.5638 | InChI=1S/C12H7N3O/c16-11-6-10-14-8-2-1-3-9(15(10)11)12-7(8)4-5-13-12/h1-6,13H                           |
| <b>r1-27</b>  |    | 9.5498  | 70.995   | -7.6582  | 122.0955 | 232.633  | InChI=1S/C12H7N3O/c16-10-3-1-2-7-4-5-13-12(7)14-15-8-6-9(15)11(8)10/h1-6H, 8H, 13, 14)/b3-1-, 7-2-      |
| <b>X23-44</b> |    | 18.3949 | 167.5106 | -9.0148  | 39.9135  | 232.7164 | InChI=1S/C12H7N3O/c16-12-10-8(3-5-14-10)13-4-1-2-7-6-9-11(12)15(7)9/h1-6,14H/b2-1-, 13-4-               |
| <b>q1-32</b>  |    | 5.2401  | 48.3767  | -5.4399  | 165.6213 | 232.7223 | InChI=1S/C12H7N3O/c16-12-11-7(4-5-13-11)2-1-3-8-9-6-10(8)15(12)14-9/h1-6,13H/b2-1-, 8-3+                |
| <b>C-61</b>   |    | 11.5383 | 201.0088 | -4.4427  | 0.1180   | 232.7302 | InChI=1S/C12H7N3O/c16-12-10-7(2-1-4-14-12)8-3-5-13-11(8)15-6-9(10)15/h1-6,13H                           |
| <b>x2-18</b>  |    | 19.4285 | 147.9367 | -13.5681 | 66.9484  | 232.9439 | InChI=1S/C12H7N3O/c16-12-10-7-6-9-8(2-4-14-9)13-3-1-5-15(12)11(7)10/h1-6,14H/b5-1-, 7-6-, 13-3+         |
| <b>q1-42</b>  |    | 30.1319 | 124.7522 | -11.8872 | 59.0494  | 232.9637 | InChI=1S/C12H7N3O/c16-12-8(15-9-6-10(15)14-9)3-1-2-7-4-5-13-11(7)12/h1-6,13H                            |
| <b>X22-4</b>  |    | 7.6323  | 183.696  | -8.0542  | 34.7744  | 233.1502 | InChI=1S/C12H7N3O/c16-10-6-8-7-2-1-4-13-9-3-5-14-12(9)15(10)11(7)8/h1-6,14H/b2-1-, 13-4-                |
| <b>F-69</b>   |   | 15.9111 | 199.066  | -7.0721  | 10.0136  | 233.1561 | InChI=1S/C12H7N3O/c16-12-14-11-8(4-5-13-11)9-3-1-2-7-6-10(7)15(9)12/h1-6H, 8H, 13, 14, 16)              |
| <b>x7-17</b>  |  | 18.2895 | 149.2043 | -15.4691 | 52.1892  | 233.6744 | InChI=1S/C12H7N3O/c16-9-3-1-2-7-4-5-13-10(7)12-11-8(6-14-9)15(11)12/h1-6,13H/b3-1-, 7-2-, 12-10-, 14-6+ |
| <b>B-208</b>  |  | 11.8450 | 110.0315 | 0.2354   | 74.3510  | 233.6863 | InChI=1S/C12H7N3O/c16-12-9-6-15-5-1-2-7(10(9)14-15)8-3-4-13-11(8)12/h1-6,13H                            |
| <b>o-70</b>   |  | 15.2078 | 168.682  | -12.9434 | 38.1839  | 233.7024 | InChI=1S/C12H7N3O/c16-11-10-9(3-4-13-10)15-5-1-2-7-6-8(7)14-12(11)15/h1-6,13H/b5-1-, 7-2-, 14-12-       |
| <b>A-160</b>  |  | 13.6497 | 152.8499 | -6.4192  | 46.7986  | 233.7059 | InChI=1S/C12H7N3O/c16-12-11-10-8(2-1-5-15(10)11)7-3-4-13-9(7)6-14-12/h1-6,13H/b14-6-                    |
| <b>H1-5</b>   |  | 18.882  | 147.977  | -15.0609 | 62.804   | 233.7534 | InChI=1S/C12H7N3O/c16-10-3-1-2-7(8-4-5-13-12(8)10)11-9-6-15(9)14-11/h1-6,13H                            |
| <b>G1-90</b>  |  | 18.0752 | 140.2962 | -11.6047 | 72.2171  | 233.76   | InChI=1S/C12H7N3O/c16-10-3-1-2-9-7-4-5-13-11(7)12(15(9)10)8-6-14-8/h1-6,13H/b12-8+                      |
| <b>r-38</b>   |  | 12.6606 | 184.8085 | -9.2839  | 26.6117  | 233.8792 | InChI=1S/C12H7N3O/c16-9-6-10-14-12-7(4-5-13-12)2-1-3-8-11(9)15(8)10/h1-6H, 8H, 13, 14)/b3-1-, 7-2-      |
| <b>C-49</b>   |  | 10.1922 | 146.7333 | 0.6096   | 51.2103  | 234.0225 | InChI=1S/C12H7N3O/c16-12-10-7-2-1-4-14-15(12)6-9(10)11-8(7)3-5-13-11/h1-6,13H/b2-1-, 14-4-              |
| <b>B-92</b>   |  | 20.6992 | 144.3666 | -15.1999 | 69.6780  | 234.0546 | InChI=1S/C12H7N3O/c16-12-8-2-1-5-15(12)14-10-6-9(10)11-7(8)3-4-13-11/h1-6,13H/b14-10-                   |

|               |                                                                                     |         |          |          |          |          |                                                                                                         |
|---------------|-------------------------------------------------------------------------------------|---------|----------|----------|----------|----------|---------------------------------------------------------------------------------------------------------|
| <b>q-34</b>   |    | 5.5639  | 66.0165  | -3.0827  | 146.0699 | 234.0986 | InChI=1S/C12H7N3O/c16-12-8-6-9-10(12)14-9)3-1-2-7-4-5-13-11(7)8/h1-6,13H/b2-1-,10-3-                    |
|               | <chem>C12H7N3O</chem>                                                               |         |          |          |          |          |                                                                                                         |
| <b>H-55</b>   |    | 6.5222  | 49.7558  | -1.7669  | 155.2879 | 234.2652 | InChI=1S/C12H7N3O/c16-10-6-7-2-1-3-9-8-4-5-13-11(8)12(14-7)15(9)10/h1-6,13H/b2-1-,9-3-                  |
|               | <chem>C12H7N3O</chem>                                                               |         |          |          |          |          |                                                                                                         |
| <b>k-30</b>   |    | 6.0001  | 85.0581  | -5.6872  | 135.7164 | 234.3206 | InChI=1S/C12H7N3O/c16-9-6-8-10(9)12-11-7(2-4-14-11)13-3-1-5-15(8)12/h1-6,14H/b5-1-,13-3+                |
|               | <chem>C12H7N3O</chem>                                                               |         |          |          |          |          |                                                                                                         |
| <b>B-169</b>  |    | 3.8988  | 92.6715  | -0.6888  | 118.0569 | 234.4115 | InChI=1S/C12H7N3O/c16-12-14-11-9-6-7(2-1-5-15(9)12)8-3-4-13-10(8)11/h1-6,13H                            |
|               | <chem>C12H7N3O</chem>                                                               |         |          |          |          |          |                                                                                                         |
| <b>A-54</b>   |    | 4.4632  | 89.1429  | -3.0975  | 124.7452 | 234.567  | InChI=1S/C12H7N3O/c16-12-9(6-14-12)10-7-2-1-5-15(10)11-8(7)3-4-13-11/h1-6,13H/b10-9+                    |
|               | <chem>C12H7N3O</chem>                                                               |         |          |          |          |          |                                                                                                         |
| <b>A-138</b>  |    | 4.4627  | 89.1406  | -3.0973  | 124.7462 | 234.567  | InChI=1S/C12H7N3O/c16-12-9(6-14-12)10-7-2-1-5-15(10)11-8(7)3-4-13-11/h1-6,13H/b10-9-                    |
|               | <chem>C12H7N3O</chem>                                                               |         |          |          |          |          |                                                                                                         |
| <b>B-118</b>  |    | 5.4979  | 72.4402  | -1.2768  | 131.5807 | 234.7420 | InChI=1S/C12H7N3O/c16-12-11-8(3-4-13-11)7-2-1-5-15-9(7)6-10(15)14-12/h1-6,13H/b14-10-                   |
|               | <chem>C12H7N3O</chem>                                                               |         |          |          |          |          |                                                                                                         |
| <b>x4-10</b>  |    | 5.237   | 57.8784  | -4.2308  | 156.6333 | 234.863  | InChI=1S/C12H7N3O/c16-9-6-14-11-8-3-1-2-7-4-5-13-10(7)12(11)15(8)9/h1-6,13H/b2-1-,3-1-,7-2-,8-3+,12-10+ |
|               | <chem>C12H7N3O</chem>                                                               |         |          |          |          |          |                                                                                                         |
| <b>x9-22</b>  |    | 5.7086  | 97.0237  | -4.8935  | 118.8518 | 234.906  | InChI=1S/C12H7N3O/c16-12-10-8(15-9(10)6-14-15)3-1-2-7-4-5-13-11(7)12/h1-6,13H/b2-1-,8-3+                |
|               | <chem>C12H7N3O</chem>                                                               |         |          |          |          |          |                                                                                                         |
| <b>H11-55</b> |   | 6.3126  | 180.2328 | -0.0963  | 43.0576  | 234.9871 | InChI=1S/C12H7N3O/c16-12-9-6-7(14-9)2-1-3-10-8-4-5-13-11(8)15(10)12/h1-6,13H/b2-1-,10-3-                |
|               | <chem>C12H7N3O</chem>                                                               |         |          |          |          |          |                                                                                                         |
| <b>G1-107</b> |  | 19.4549 | 186.8631 | -6.3525  | 20.8858  | 234.9956 | InChI=1S/C12H7N3O/c16-10-3-1-2-8-7-4-5-13-9(7)6-14-12-11(8)15(10)12/h1-6,13H                            |
|               | <chem>C12H7N3O</chem>                                                               |         |          |          |          |          |                                                                                                         |
| <b>A-3</b>    |  | 6.8185  | 45.5305  | -1.6038  | 150.2606 | 235.0039 | InChI=1S/C12H7N3O/c16-9-6-14-15-5-1-2-7-8-3-4-13-11(8)12(15)10(7)9/h1-6,13H                             |
|               | <chem>C12H7N3O</chem>                                                               |         |          |          |          |          |                                                                                                         |
| <b>n-183</b>  |  | 4.473   | 84.6969  | -0.4592  | 117.5213 | 235.1446 | InChI=1S/C12H7N3O/c16-12-9-7-2-1-5-15(12)8-3-4-13-10(8)11(9)14-6-7/h1-6,13H                             |
|               | <chem>C12H7N3O</chem>                                                               |         |          |          |          |          |                                                                                                         |
| <b>x7-37</b>  |  | 42.4627 | 144.8357 | -27.9588 | 46.3108  | 235.1549 | InChI=1S/C12H7N3O/c16-8-3-1-2-7-4-5-13-10(7)9-11-12(9)15(11)6-14-8/h1-6,13H/b3-1-,7-2-,10-9-,14-6-      |
|               | <chem>C12H7N3O</chem>                                                               |         |          |          |          |          |                                                                                                         |
| <b>H-67</b>   |  | 6.4168  | 44.4882  | -1.9093  | 157.6008 | 235.1678 | InChI=1S/C12H7N3O/c16-10-8-3-1-2-7-6-14-12(10)15(7)11-9(8)4-5-13-11/h1-6,13H/b2-1-,8-3-                 |
|               | <chem>C12H7N3O</chem>                                                               |         |          |          |          |          |                                                                                                         |
| <b>p1-59</b>  |  | 19.5343 | 141.4102 | -13.0237 | 60.1465  | 235.2569 | InChI=1S/C12H7N3O/c16-9-3-1-2-7-4-5-13-10(7)11-8-6-15(8)12(9)14-11/h1-6,13H/b3-1-,7-2-,11-10+           |
|               | <chem>C12H7N3O</chem>                                                               |         |          |          |          |          |                                                                                                         |
| <b>A-114</b>  |  | 3.4111  | 121.5172 | -1.6734  | 98.4001  | 235.2985 | InChI=1S/C12H7N3O/c16-12-10-7-2-1-5-15(12)9(10)6-14-11-8(7)3-4-13-11/h1-6,13H                           |
|               | <chem>C12H7N3O</chem>                                                               |         |          |          |          |          |                                                                                                         |
| <b>H-157</b>  |  | 5.3406  | 34.793   | -1.6585  | 172.1692 | 235.308  | InChI=1S/C12H7N3O/c16-12-14-10-7-2-1-3-9(15(12)6-7)8-4-5-13-11(8)10/h1-6,13H                            |
|               | <chem>C12H7N3O</chem>                                                               |         |          |          |          |          |                                                                                                         |
| <b>H-35</b>   |  | 16.4049 | 190.4723 | -20.7734 | 46.8782  | 235.3859 | InChI=1S/C12H7N3O/c16-12(10-7-6-8(7)10)15-5-1-3-13-11-9(15)2-4-14-11/h1-6,14H                           |
|               | <chem>C12H7N3O</chem>                                                               |         |          |          |          |          |                                                                                                         |

|               |                                                                                     |         |          |          |          |          |                                                                                                |
|---------------|-------------------------------------------------------------------------------------|---------|----------|----------|----------|----------|------------------------------------------------------------------------------------------------|
| <b>B-32</b>   |    | 4.0310  | 53.8065  | -2.0160  | 153.6411 | 235.7093 | InChI=1S/C12H7N3O/c16-10-6-9-11-7(2-1-5-15(9)14-11)8-3-4-13-12(8)10/h1-6,13H                   |
| <b>q11-56</b> |    | 14.7876 | 131.044  | -11.0555 | 70.2386  | 235.9875 | InChI=1S/C12H7N3O/c16-12-8-3-1-2-7-4-5-13-10(7)11(12)14-15-6-9(8)15/h1-6,13H/b2-1-,8-3-        |
| <b>C-64</b>   |    | 35.3079 | 175.0093 | -15.8221 | 18.2245  | 236.1323 | InChI=1S/C12H7N3O/c16-12-11-8(3-5-14-11)7-2-1-4-13-10(7)9-6-15(9)12/h1-6,14H                   |
| <b>A2-2</b>   |    | 4.846   | 103.887  | -2.8188  | 107.8602 | 236.2458 | InChI=1S/C12H7N3O/c16-12-10-8(3-5-13-10)7-2-1-4-14-11-9(7)6-15(11)12/h1-6,13H                  |
| <b>F-38</b>   |    | 7.1382  | 52.8548  | -2.3348  | 151.3416 | 236.2717 | InChI=1S/C12H7N3O/c16-11-6-9-7-2-1-3-10(9)15(11)14-12-8(7)4-5-13-12/h1-6H,(H,13,14)            |
| <b>r-40</b>   |    | 5.212   | 53.1064  | -5.5346  | 168.0242 | 236.3113 | InChI=1S/C12H7N3O/c16-12-9-6-10-8(9)3-1-2-7-4-5-13-11(7)14-15(10)12/h1-6H,(H,13,14)/b3-1-,7-2- |
| <b>r-42</b>   |    | 21.662  | 156.4119 | -15.0252 | 62.5204  | 236.5194 | InChI=1S/C12H7N3O/c16-12-10-8(9-6-15(9)12)3-1-2-7-4-5-13-11(7)14-10/h1-6H,(H,13,14)            |
| <b>l-74</b>   |    | 16.8217 | 129.1038 | -11.7042 | 74.4554  | 236.6476 | InChI=1S/C12H7N3O/c16-9-6-7-10-12(7)15(5-1-3-13-10)8-2-4-14-11(8)9/h1-6,14H                    |
| <b>A-206</b>  |   | 5.6489  | 34.7901  | -1.9616  | 163.9372 | 236.6877 | InChI=1S/C12H7N3O/c16-12-10-8(3-4-13-10)7-2-1-5-15-6-14-9(7)11(12)15/h1-6,13H                  |
| <b>s12-45</b> |  | 11.9854 | 148.9434 | -6.8837  | 49.096   | 236.7013 | InChI=1S/C12H7N3O/c16-12-8-3-1-2-7-4-5-13-9(7)6-10-11(12)15(10)14-8/h1-6,13H/b3-1-,7-2-,9-6-   |
| <b>l-36</b>   |  | 13.3774 | 213.0623 | -1.6772  | 0.74     | 236.7718 | InChI=1S/C12H7N3O/c16-12-7-6-13-3-1-5-15-8-2-4-14-10(8)9(12)11(7)15/h1-6,14H/b5-1-,7-6-,13-3-  |
| <b>B-162</b>  |  | 3.6082  | 155.1536 | -1.3118  | 75.5759  | 236.8136 | InChI=1S/C12H7N3O/c16-12-14-11-9-6-7(2-1-5-15(11)12)8-3-4-13-10(8)9/h1-6,13H/b5-1-,7-2+        |
| <b>H-102</b>  |  | 8.3104  | 69.148   | -2.949   | 127.886  | 236.8199 | InChI=1S/C12H7N3O/c16-12-10-8(4-5-13-10)9-3-1-2-7-6-15(9)11(7)14-12/h1-6,13H                   |
| <b>x9-23</b>  |  | 5.5449  | 58.9511  | -4.6161  | 151.7238 | 236.8921 | InChI=1S/C12H7N3O/c16-12-10-7(4-5-13-10)2-1-3-9-8-6-14-15(9)11(8)12/h1-6,13H/b2-1-,9-3+        |
| <b>n-145</b>  |  | 15.8594 | 200.659  | -11.8811 | 29.0824  | 236.9182 | InChI=1S/C12H7N3O/c16-12-11-9(3-4-13-11)15(12)5-1-2-7-8-6-14-10(7)8/h1-6,13H/b5-1-,7-2-        |
| <b>A-157</b>  |  | 3.3946  | 120.0503 | -1.7466  | 100.9181 | 236.9842 | InChI=1S/C12H7N3O/c16-12-10-8-2-1-5-15(12)11(10)14-6-9-7(8)3-4-13-9/h1-6,13H                   |
| <b>n-176</b>  |  | 4.5784  | 86.4905  | -0.4668  | 117.6719 | 236.9969 | InChI=1S/C12H7N3O/c16-12-10-7-6-14-8(10)2-1-5-15(12)9-3-4-13-11(7)9/h1-6,13H                   |
| <b>p-3</b>    |  | 5.3453  | 93.8672  | -4.345   | 128.9922 | 237.0443 | InChI=1S/C12H7N3O/c16-11-9-6-8-7(4-5-13-8)2-1-3-10-14-12(11)15(9)10/h1-6,13H/b2-1-,9-6-,10-3-  |
| <b>x4-47</b>  |  | 13.4872 | 192.5869 | -6.6971  | 10.1273  | 237.5042 | InChI=1S/C12H7N3O/c16-12-11-10-9-7(4-5-13-9)2-1-3-8(6-14-12)15(10)11/h1-6,13H/b2-1-,8-3-       |

|               |                                                                                     |          |           |           |           |           |                                                                                                              |
|---------------|-------------------------------------------------------------------------------------|----------|-----------|-----------|-----------|-----------|--------------------------------------------------------------------------------------------------------------|
| <b>C-55</b>   |    | 33, 9860 | 174, 3142 | -15, 0482 | 17, 3311  | 237, 5734 | InChI=1S/C12H7N3O/c16-12-11-7(2-1-4-13-11)8-3-5-14-10(8)9-6-15(9)12/h1-6, 14H                                |
| <b>O-149</b>  |    | 4, 6514  | 95, 6722  | -1, 7943  | 117, 1836 | 237, 8869 | InChI=1S/C12H7N3O/c16-10-6-8-7(10)2-1-5-15-9-3-4-13-12(9)11(8)14-15/h1-6, 13H/b5-1-, 7-2+                    |
| <b>K1-16</b>  |    | 22, 535  | 148, 0259 | -12, 0882 | 42, 6975  | 237, 9141 | InChI=1S/C12H7N3O/c16-12-7-6-9-11(7)15(9)5-1-3-13-8-2-4-14-10(8)12/h1-6, 14H/b5-1-, 13-3+                    |
| <b>O-253</b>  |    | 5, 9063  | 60, 5419  | -3, 1271  | 153, 8771 | 238, 3723 | InChI=1S/C12H7N3O/c16-12-14-9-6-8-7(9)2-1-5-15(12)10-3-4-13-11(8)10/h1-6, 13H/b5-1-, 7-2-, 14-9-             |
| <b>B-130</b>  |    | 4, 1157  | 87, 4054  | -2, 0463  | 138, 5348 | 238, 4131 | InChI=1S/C12H7N3O/c16-12-8-6-10-7(3-4-13-10)9-2-1-5-15(12)11(8)14-9/h1-6, 13H                                |
| <b>P1-14</b>  |    | 28, 9104 | 126, 1455 | -11, 5132 | 66, 7335  | 238, 435  | InChI=1S/C12H7N3O/c16-8-3-1-2-7-4-5-13-11(7)12(8)15-9-6-10(15)14-9/h1-6, 13H                                 |
| <b>H1-134</b> |    | 5, 0438  | 70, 585   | -2, 743   | 149, 1579 | 238, 5059 | InChI=1S/C12H7N3O/c16-11-3-1-2-7-8-4-5-13-12(8)15(11)10-6-9(7)14-10/h1-6, 13H/b3-1-, 7-2-                    |
| <b>O-20</b>   |    | 5, 6163  | 39, 0538  | -1, 1884  | 166, 3329 | 238, 577  | InChI=1S/C12H7N3O/c16-11-7-2-1-5-15-9-3-4-13-12(9)14-8(11)6-10(7)15/h1-6, 13H                                |
| <b>P11-14</b> |   | 18, 0268 | 118, 6225 | -12, 7712 | 99, 8425  | 238, 7343 | InChI=1S/C12H7N3O/c16-12-10-8-3-1-2-7-4-5-13-9(7)6-14-15(12)11(8)10/h1-6, 13H/b2-1-, 8-3-, 14-6-             |
| <b>X4-4</b>   |  | 13, 6235 | 194, 1125 | -6, 8663  | 13, 0311  | 238, 7979 | InChI=1S/C12H7N3O/c16-8-6-14-9-3-1-2-7-4-5-13-10(7)12-11(8)15(9)12/h1-6, 13H/b2-1-, 9-3-                     |
| <b>H-73</b>   |  | 6, 2084  | 73, 3471  | -2, 3343  | 153, 5252 | 238, 8004 | InChI=1S/C12H7N3O/c16-12-9-3-1-2-7-6-15(12)11(7)14-10-8(9)4-5-13-10/h1-6, 13H/b2-1-, 9-3-                    |
| <b>X4-38</b>  |  | 7, 7595  | 143, 7756 | -3, 2322  | 67, 2917  | 238, 9582 | InChI=1S/C12H7N3O/c16-12-9-8-3-1-2-7-4-5-13-10(7)11(9)15(12)14-6-8/h1-6, 13H/b2-1-, 3-1-, 7-2-, 8-3-, 11-10- |
| <b>X9-48</b>  |  | 12, 3702 | 126, 511  | -8, 4338  | 82, 1383  | 239, 1765 | InChI=1S/C12H7N3O/c16-12-9-7(4-5-13-9)2-1-3-8-10-11(8)15(12)6-14-10/h1-6, 13H/b2-1-, 8-3-                    |
| <b>X7-32</b>  |  | 17, 7841 | 147, 9991 | -15, 4866 | 56, 7966  | 239, 1875 | InChI=1S/C12H7N3O/c16-8-3-1-2-7-4-5-13-9(7)10-11-12(14-6-8)15(10)11/h1-6, 13H/b3-1-, 7-2-, 10-9-, 14-6+      |
| <b>O-167</b>  |  | 5, 7022  | 43, 7935  | -0, 1122  | 164, 9248 | 239, 3381 | InChI=1S/C12H7N3O/c16-12-7-2-1-5-15-6-8(7)10(14-12)11-9(15)3-4-13-11/h1-6, 13H                               |
| <b>X23-46</b> |  | 22, 3422 | 135, 698  | -11, 2101 | 63, 0155  | 239, 3771 | InChI=1S/C12H7N3O/c16-9-6-7-2-1-4-13-8-3-5-14-10(8)12-11(9)15(7)12/h1-6, 14H/b1-6, 13-4-                     |
| <b>X6-5</b>   |  | 22, 89   | 150, 1825 | -12, 3508 | 59, 3132  | 239, 4146 | InChI=1S/C12H7N3O/c16-9-3-1-2-7-4-5-13-8(7)6-15-12-10(9)11(12)14-15/h1-6, 13H/b3-1-, 7-2-, 8-6+              |
| <b>O-243</b>  |  | 2, 4676  | 61, 6351  | -1, 8065  | 171, 6128 | 239, 4483 | InChI=1S/C12H7N3O/c16-10-6-7-8-2-1-5-15(10)9-3-4-13-12(9)11(7)14-8/h1-6, 13H/b5-1-, 8-2+                     |
| <b>O-54</b>   |  | 6, 4289  | 122, 9127 | -2, 2845  | 85, 882   | 239, 5157 | InChI=1S/C12H7N3O/c16-12-7-6-8(12)14-10-2-1-5-15(10)9-3-4-13-11(7)9/h1-6, 13H/b14-8+                         |

|               |  |         |          |          |          |          |                                                                                                      |
|---------------|--|---------|----------|----------|----------|----------|------------------------------------------------------------------------------------------------------|
| <b>x6-26</b>  |  | 13.4144 | 161.1687 | -9.0753  | 41.6756  | 239.5438 | InChI=1S/C12H7N3O/c16-10-3-1-2-7-4-5-13-8(7)6-9-12-11(10)14-15(9)12/h1-6,13H/b3-1-,7-2-,8-6+         |
| <b>x7-31</b>  |  | 19.522  | 139.2145 | -18.4576 | 58.5042  | 239.7469 | InChI=1S/C12H7N3O/c16-8-3-1-2-7-4-5-13-10(7)9-11-12(9)15(11)14-6-8/h1-6,13H/b3-1-,7-2-,10-9-,14-6-   |
| <b>o-172</b>  |  | 6.407   | 43.7696  | -2.0468  | 155.4234 | 239.7625 | InChI=1S/C12H7N3O/c16-12-7-2-1-5-15-10-3-4-13-9(10)6-8(7)11(15)14-12/h1-6,13H                        |
| <b>x9-41</b>  |  | 5.3661  | 58.3066  | -4.9588  | 160.8194 | 239.8689 | InChI=1S/C12H7N3O/c16-12-9-7(4-5-13-9)2-1-3-8-10-11(12)15(8)6-14-10/h1-6,13H/b2-1-,8-3+              |
| <b>q-59</b>   |  | 10.526  | 109.9774 | -1.7253  | 94.982   | 240.0184 | InChI=1S/C12H7N3O/c16-12-9-3-1-2-7-4-5-13-10(7)8-6-15(9)11(8)14-12/h1-6,13H/b2-1-,9-3-               |
| <b>t1-4</b>   |  | 19.8556 | 191.9848 | -21.8644 | 45.7405  | 240.0277 | InChI=1S/C12H7N3O/c16-12-14-3-1-5-15(12)9-2-4-13-11(9)10-7-6-8(7)10/h1-6,13H                         |
| <b>B-81</b>   |  | 6.2613  | 119.3281 | -2.2587  | 87.2091  | 240.0513 | InChI=1S/C12H7N3O/c16-11-8-6-10(11)15-5-1-2-9(15)7-3-4-13-12(7)14-8/h1-6,13H/b4-8+                   |
| <b>q-4</b>    |  | 6.3747  | 55.9861  | -3.4749  | 151.8547 | 240.1564 | InChI=1S/C12H7N3O/c16-10-6-9-11-7(4-5-13-11)2-1-3-8-12(10)14-15(8)9/h1-6,13H/b2-1-,9-3-              |
| <b>G-38</b>   |  | 4.9734  | 27.2877  | -1.9936  | 175.6906 | 240.1849 | InChI=1S/C12H7N3O/c16-10-6-14-15-9-3-1-2-7(11)9(10)8-4-5-13-12(8)15/h1-6,13H                         |
| <b>H11-22</b> |  | 5.4495  | 50.9886  | -1.0178  | 164.796  | 240.3637 | InChI=1S/C12H7N3O/c16-12-8-2-1-3-9-7-4-5-13-11(7)10(6-14-8)15(9)12/h1-6,13H                          |
| <b>q-64</b>   |  | 4.2659  | 50.798   | -2.6957  | 169.6562 | 240.4826 | InChI=1S/C12H7N3O/c16-12-14-8-6-10-11-7(4-5-13-11)2-1-3-9(8)15(10)12/h1-6,13H/b2-1-,9-3-             |
| <b>o-199</b>  |  | 3.5552  | 90.3155  | -2.1622  | 139.1277 | 240.6488 | InChI=1S/C12H7N3O/c16-12-8-6-14-10(8)7-2-1-5-15(12)9-3-4-13-11(7)9/h1-6,13H                          |
| <b>r-8</b>    |  | 19.0369 | 144.5411 | -13.5798 | 66.397   | 240.8203 | InChI=1S/C12H7N3O/c16-11-9-6-14-12-7(4-5-13-12)2-1-3-8-10(11)15(8)9/h1-6H, (H,13,14)/b3-1-,7-2-,9-6- |
| <b>F-31</b>   |  | 6.4483  | 78.6891  | -1.5998  | 132.0745 | 240.9216 | InChI=1S/C12H7N3O/c16-12-8-6-15-9(2-1-3-10(8)15)7-4-5-13-11(7)14-12/h1-6H, (H,13,14,16)/b9-7-        |
| <b>q-53</b>   |  | 3.9676  | 56.3652  | -2.3623  | 163.5474 | 240.9891 | InChI=1S/C12H7N3O/c16-12-8-3-1-2-7-4-5-13-11(7)10-6-9(8)14-15(10)12/h1-6,13H/b2-1-,8-3+              |
| <b>r1-5</b>   |  | 23.063  | 146.3055 | -12.5068 | 66.4165  | 241.1032 | InChI=1S/C12H7N3O/c16-9-3-1-2-7-4-5-13-12(7)14-15-6-8-10(9)11(8)15/h1-6H, (H,13,14)/b3-1-,7-2-       |
| <b>x7-21</b>  |  | 5.0425  | 57.3162  | -4.8088  | 160.4361 | 241.4273 | InChI=1S/C12H7N3O/c16-9-3-1-2-7-4-5-13-10(7)12-8-6-14-15(12)11(8)9/h1-6,13H/b3-1-,7-2-,12-10-        |
| <b>H-50</b>   |  | 3.935   | 103.5715 | -0.8197  | 113.2415 | 241.7669 | InChI=1S/C12H7N3O/c16-10-6-7-2-1-3-9-8-4-5-13-12(8)15(10)11(7)14-9/h1-6,13H                          |
| <b>A-139</b>  |  | 19.5803 | 203.4857 | -11.7371 | 16.8385  | 241.7915 | InChI=1S/C12H7N3O/c16-11-8(7-3-4-13-10(7)11)2-1-5-15-9-6-14-12(9)15/h1-6,13H/b5-1-,8-2-              |

|               |                                                                                     |         |          |          |          |          |                                                                                                                 |
|---------------|-------------------------------------------------------------------------------------|---------|----------|----------|----------|----------|-----------------------------------------------------------------------------------------------------------------|
| <b>k-45</b>   |    | 4.2593  | 177.6282 | -1.4932  | 64.1788  | 241.8893 | InChI=1S/C12H7N3O/c16-12-10-7-6-9(10)15(12)5-1-3-13-8-2-4-14-11(7)8/h1-6,14H/b5-1-,13-3+                        |
|               | $C_{12}H_7N_3O$                                                                     |         |          |          |          |          |                                                                                                                 |
| <b>H11-13</b> |    | 4.1047  | 101.1007 | -2.1306  | 127.2043 | 241.9395 | InChI=1S/C12H7N3O/c16-12-9-3-1-2-7-6-10(15)(12)14-9)11-8(7)4-5-13-11/h1-6,13H/b3-1-,7-2+                        |
|               | $C_{12}H_7N_3O$                                                                     |         |          |          |          |          |                                                                                                                 |
| <b>G-11</b>   |    | 3.1031  | 84.7821  | -1.6985  | 133.0256 | 241.9454 | InChI=1S/C12H7N3O/c16-12-9-3-1-2-7(10-6-14-15(9)10)8-4-5-13-11(8)12/h1-6,13H                                    |
|               | $C_{12}H_7N_3O$                                                                     |         |          |          |          |          |                                                                                                                 |
| <b>p11-19</b> |    | 18.266  | 151.9113 | -14.6336 | 59.9277  | 242.1453 | InChI=1S/C12H7N3O/c16-12-11-10-9(15(10)11)3-1-2-7-4-5-13-8(7)6-14-12/h1-6,13H/b2-1-,9-3-,14-6-                  |
|               | $C_{12}H_7N_3O$                                                                     |         |          |          |          |          |                                                                                                                 |
| <b>x5-40</b>  |    | 4.4562  | 117.3397 | -3.7726  | 118.3995 | 242.1633 | InChI=1S/C12H7N3O/c16-12-9-10-8(6-15(10)12)3-1-2-7-4-5-13-11(7)14-9/h1-6H, 6H, 13, 14)/b3-1-,7-2-               |
|               | $C_{12}H_7N_3O$                                                                     |         |          |          |          |          |                                                                                                                 |
| <b>q11-57</b> |    | 4.2369  | 96.3689  | -2.4449  | 128.9925 | 242.1651 | InChI=1S/C12H7N3O/c16-12-8-3-1-2-7-4-5-13-11(7)9-6-10(8)15(12)14-9/h1-6,13H/b2-1-,8-3+                          |
|               | $C_{12}H_7N_3O$                                                                     |         |          |          |          |          |                                                                                                                 |
| <b>o-229</b>  |    | 13.8239 | 74.8653  | -2.6136  | 118.8357 | 242.3582 | InChI=1S/C12H7N3O/c16-10-6-7-8-2-1-5-15(12(7)14-8)9-3-4-13-11(9)10/h1-6,13H                                     |
|               | $C_{12}H_7N_3O$                                                                     |         |          |          |          |          |                                                                                                                 |
| <b>x9-30</b>  |    | 13.269  | 134.2138 | -8.222   | 78.6737  | 242.4382 | InChI=1S/C12H7N3O/c16-12-10-7(4-5-13-10)2-1-3-8-9-6-14-15(12)11(8)9/h1-6,13H/b2-1-,8-3-                         |
|               | $C_{12}H_7N_3O$                                                                     |         |          |          |          |          |                                                                                                                 |
| <b>q11-84</b> |    | 6.8166  | 151.1206 | -2.2285  | 68.4219  | 242.5161 | InChI=1S/C12H7N3O/c16-12-8-3-1-2-7-4-5-13-10(7)11-9(6-8)15(12)14-11/h1-6,13H/b2-1-,8-3+                         |
|               | $C_{12}H_7N_3O$                                                                     |         |          |          |          |          |                                                                                                                 |
| <b>x7-33</b>  |  | 18.0067 | 146.8751 | -14.6132 | 64.2142  | 242.5671 | InChI=1S/C12H7N3O/c16-8-3-1-2-7-4-5-13-9(7)10-11-12(14-6-8)15(10)11/h1-6,13H/b3-1-,7-2-,10-9-,14-6-             |
|               | $C_{12}H_7N_3O$                                                                     |         |          |          |          |          |                                                                                                                 |
| <b>p1-51</b>  |  | 7.3995  | 60.1603  | -5.842   | 152.6547 | 242.7183 | InChI=1S/C12H7N3O/c16-9-3-1-2-7-4-5-13-11(7)10-8-6-15(9)12(10)14-8/h1-6,13H/b3-1-,7-2-,11-10+                   |
|               | $C_{12}H_7N_3O$                                                                     |         |          |          |          |          |                                                                                                                 |
| <b>B-231</b>  |  | 15.8109 | 190.0125 | -9.2424  | 18.4947  | 243.0287 | InChI=1S/C12H7N3O/c16-12-9-6-15(9)5-1-2-7-8-3-4-13-10(8)11(7)14-12/h1-6,13H/b5-1-,7-2-,11-11+                   |
|               | $C_{12}H_7N_3O$                                                                     |         |          |          |          |          |                                                                                                                 |
| <b>A1-36</b>  |  | 7.6389  | 192.5339 | -5.7235  | 25.9137  | 243.1508 | InChI=1S/C12H7N3O/c16-12-9-7(3-5-14-9)8-2-1-4-13-6-15-10(8)11(12)15/h1-6,14H/b4-1-,8-2-,13-6-                   |
|               | $C_{12}H_7N_3O$                                                                     |         |          |          |          |          |                                                                                                                 |
| <b>i-25</b>   |  | 24.1093 | 149.7976 | -16.3959 | 74.1693  | 243.3247 | InChI=1S/C12H7N3O/c16-12-10-7(9-6-15(9)12)2-1-4-13-8-3-5-14-11(8)10/h1-6,14H/b2-1-,4-1-,7-2-,11-10-,13-4-,13-8- |
|               | $C_{12}H_7N_3O$                                                                     |         |          |          |          |          |                                                                                                                 |
| <b>x4-44</b>  |  | 4.0233  | 60.6437  | -3.6465  | 164.3112 | 243.4323 | InChI=1S/C12H7N3O/c16-12-11-9-8(15(12)6-14-11)3-1-2-7-4-5-13-10(7)9/h1-6,13H                                    |
|               | $C_{12}H_7N_3O$                                                                     |         |          |          |          |          |                                                                                                                 |
| <b>H1-59</b>  |  | 5.6797  | 59.7057  | -3.5645  | 153.2934 | 243.6019 | InChI=1S/C12H7N3O/c16-7-2-1-3-9-8-4-5-13-11(8)12-10(6-7)15(9)14-12/h1-6,13H/b2-1-,9-3-,10-6-                    |
|               | $C_{12}H_7N_3O$                                                                     |         |          |          |          |          |                                                                                                                 |
| <b>B-132</b>  |  | 5.7484  | 120.8495 | -2.7801  | 91.6077  | 243.7016 | InChI=1S/C12H7N3O/c16-11-9-6-8-7(3-4-13-8)10-2-1-5-15(10)12(11)14-9/h1-6,13H/b9-6-                              |
|               | $C_{12}H_7N_3O$                                                                     |         |          |          |          |          |                                                                                                                 |
| <b>C-33</b>   |  | 8.8174  | 121.8181 | -1.7139  | 91.4490  | 244.1836 | InChI=1S/C12H7N3O/c16-12-10-6-9-7(2-1-4-14-12)8-3-5-13-11(8)15(9)10/h1-6,13H/b2-1-,14-4+                        |
|               | $C_{12}H_7N_3O$                                                                     |         |          |          |          |          |                                                                                                                 |
| <b>X23-39</b> |  | 12.6662 | 140.5264 | -6.5939  | 74.6008  | 244.2204 | InChI=1S/C12H7N3O/c16-9-6-7-2-1-4-13-8-3-5-14-12(8)15-10(7)11(9)15/h1-6,14H/b2-1-,13-4+                         |
|               | $C_{12}H_7N_3O$                                                                     |         |          |          |          |          |                                                                                                                 |

|               |                                                                                     |         |          |          |          |          |                                                                                                      |
|---------------|-------------------------------------------------------------------------------------|---------|----------|----------|----------|----------|------------------------------------------------------------------------------------------------------|
| <b>X23-45</b> | 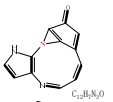   | 12.6645 | 140.5257 | -6.5917  | 74.597   | 244.2204 | InChI=1S/C12H7N3O/c16-9-6-7-2-1-4-13-8-3-5-14-12(8)15-10(7)11(9)15/h1-6,14H/b2-1-,13-4-              |
| <b>G1-70</b>  |    | 22.7006 | 191.9953 | -7.1368  | 22.3382  | 244.2428 | InChI=1S/C12H7N3O/c16-10-3-1-2-7-8-4-5-13-12(8)14-6-9-11(7)15(9)10/h1-6,13H                          |
| <b>x5-16</b>  |    | 9.6604  | 151.1014 | -4.5219  | 81.3766  | 244.3857 | InChI=1S/C12H7N3O/c16-12-9-8-3-1-2-7-4-5-13-10(7)14-11(9)15(12)6-8/h1-6H, (H,13,14)/b3-1+,7-2-       |
| <b>r1-3</b>   |    | 23.4002 | 150.5176 | -19.8241 | 49.1417  | 244.6427 | InChI=1S/C12H7N3O/c16-8-3-1-2-7-4-5-13-12(7)14-15-10-9(6-8)11(10)15/h1-6H, (H,13,14)/b3-1-,7-2-,9-6- |
| <b>o-228</b>  |    | 10.6027 | 83.5608  | -1.282   | 117.718  | 244.6467 | InChI=1S/C12H7N3O/c16-10-6-8-7-2-1-5-15(12(7)14-8)9-3-4-13-11(9)10/h1-6,13H/b8-6-                    |
| <b>X23-43</b> |    | 9.931   | 199.4421 | -8.3852  | 24.6845  | 244.8222 | InChI=1S/C12H7N3O/c16-12-9-8(3-5-14-9)13-4-1-2-7-6-15-10(7)11(12)15/h1-6,14H/b2-1-,13-4-             |
| <b>n-164</b>  |    | 5.4442  | 110.0688 | -0.3498  | 112.1621 | 244.9565 | InChI=1S/C12H7N3O/c16-12-7-2-1-5-15-8-3-4-13-9(8)11(15)10(12)14-6-7/h1-6,13H/b5-1-,7-2-,11-10+       |
| <b>q-62</b>   |    | 3.4502  | 57.4982  | -2.569   | 166.9192 | 245.0278 | InChI=1S/C12H7N3O/c16-12-14-11-8-6-15(12)9(11)3-1-2-7-4-5-13-10(7)8/h1-6,13H/b2-1-,9-3+              |
| <b>C-18</b>   |   | 4.7642  | 139.0906 | -1.4021  | 98.2811  | 245.1282 | InChI=1S/C12H7N3O/c16-12-9-6-15(12)14-4-1-2-7-8-3-5-13-11(8)10(7)9/h1-6,13H/b2-1-,14-4-              |
| <b>r1-8</b>   |  | 42.296  | 163.4048 | -27.7993 | 40.791   | 245.2317 | InChI=1S/C12H7N3O/c16-9-3-1-2-7-4-5-13-12(7)14-6-8-10-11(8)15(9)10/h1-6H, (H,13,14)/b3-1-,7-2-,8-6-  |
| <b>o-109</b>  |  | 8.0714  | 111.6225 | 0.0953   | 105.6517 | 245.7193 | InChI=1S/C12H7N3O/c16-12-7-2-1-5-15-10-3-4-13-9(10)6-8(12)11(7)14-15/h1-6,13H                        |
| <b>I-38</b>   |  | 3.9166  | 30.2351  | -2.1878  | 185.3701 | 246.0198 | InChI=1S/C12H7N3O/c16-12-7-6-9-11(12)13-3-1-5-15(9)8-2-4-14-10(7)8/h1-6,14H                          |
| <b>k-34</b>   |  | 13.524  | 131.016  | -8.036   | 80.8169  | 246.2373 | InChI=1S/C12H7N3O/c16-9-6-7-10-11-8(2-4-14-11)13-3-1-5-15(9)12(7)10/h1-6,14H/b5-1-,13-3+             |
| <b>G-57</b>   |  | 5.6497  | 27.6794  | -2.3909  | 179.2026 | 246.4004 | InChI=1S/C12H7N3O/c16-12-10-7-2-1-3-9(10)15(6-14-12)11-8(7)4-5-13-11/h1-6,13H                        |
| <b>p-22</b>   |  | 7.1483  | 83.2387  | -5.2395  | 146.5137 | 246.5805 | InChI=1S/C12H7N3O/c16-12-8-3-1-2-7-4-5-13-9(7)6-10-11(8)14-15(10)12/h1-6,13H/b2-1+,8-3-,10-6-        |
| <b>x9-45</b>  |  | 5.332   | 98.9018  | -4.6174  | 133.3593 | 246.7828 | InChI=1S/C12H7N3O/c16-11-9-8(15-6-14-12(9)15)3-1-2-7-4-5-13-10(7)11/h1-6,13H/b2-1-,8-3+              |
| <b>x4-7</b>   |  | 13.3077 | 200.0333 | -10.0222 | 29.9886  | 246.7987 | InChI=1S/C12H7N3O/c16-9-6-14-15(9)12-8-3-1-2-7-4-5-13-11(7)10(8)12/h1-6,13H                          |
| <b>x4-27</b>  |  | 9.5534  | 177.9296 | -4.7002  | 41.2341  | 247.0075 | InChI=1S/C12H7N3O/c16-12-8-3-1-2-7-4-5-13-9(7)10-11(12)15(10)14-6-8/h1-6,13H/b2-1-,8-3-              |
| <b>r1-36</b>  |  | 17.9625 | 166.7592 | -15.3786 | 49.6958  | 247.1399 | InChI=1S/C12H7N3O/c16-9-3-1-2-7-4-5-13-12(7)14-6-8-10-11(9)15(8)10/h1-6H, (H,13,14)/b3-1-,7-2-,8-6-  |

|               |  |         |          |          |          |          |                                                                                                                     |
|---------------|--|---------|----------|----------|----------|----------|---------------------------------------------------------------------------------------------------------------------|
| <b>r1-2</b>   |  | 16.8995 | 196.3954 | -20.94   | 46.0335  | 247.1777 | InChI=1S/C12H7N3O/c16-10-3-1-2-7-4-5-13-12(7)14-15(10)11-8-6-9(8)11/h1-6H, (H, 13, 14)/b3-1-, 7-2-                  |
| <b>x4-67</b>  |  | 13.1097 | 202.0803 | -9.8911  | 30.0306  | 247.2342 | InChI=1S/C12H7N3O/c16-12-14-6-15(12)11-8-3-1-2-7-4-5-13-10(7)9(8)11/h1-6, 13H                                       |
| <b>C-7</b>    |  | 5.1063  | 54.8837  | -2.8419  | 160.9390 | 247.3043 | InChI=1S/C12H7N3O/c16-12-10-6-9-7(3-5-13-9)8-2-1-4-14-15(11(8)12/h1-6, 13H                                          |
| <b>A-71</b>   |  | 7.2056  | 100.2634 | -2.4286  | 125.8972 | 247.5054 | InChI=1S/C12H7N3O/c16-12-10-9-6-14-8(2-1-5-15(9)12)7-3-4-13-11(7)10/h1-6, 13H/b5-1-, 8-2-                           |
| <b>C-12</b>   |  | 9.7206  | 141.5892 | 0.6069   | 64.8715  | 247.5450 | InChI=1S/C12H7N3O/c16-11-9-6-15-10(11)7(2-1-4-13-9)8-3-5-14-12(8)15/h1-6, 14H/b2-1-, 13-4-                          |
| <b>G1-89</b>  |  | 14.5711 | 147.5792 | -6.6587  | 64.6324  | 247.7116 | InChI=1S/C12H7N3O/c16-9-3-1-2-8-7-4-5-13-10(7)12-11(8)15(12)6-14-9/h1-6, 13H/b3-1-, 8-2-, 14-6-                     |
| <b>r-56</b>   |  | 14.1727 | 174.0853 | -8.2223  | 47.5102  | 247.8864 | InChI=1S/C12H7N3O/c16-10-6-8-11-9(15(10)11)3-1-2-7-4-5-13-12(7)14-8/h1-6H, (H, 13, 14)/b3-1-, 7-2-                  |
| <b>A2-47</b>  |  | 3.4687  | 27.7277  | -1.898   | 191.2126 | 247.8985 | InChI=1S/C12H7N3O/c16-11-8-6-15-9(2-1-4-14-12(11)15)7-3-5-13-10(7)8/h1-6, 13H                                       |
| <b>E-49</b>   |  | 6.8805  | 76.3303  | -2.9643  | 149.0215 | 248.0216 | InChI=1S/C12H7N3O/c16-12-11-7(4-5-13-11)8-2-1-3-10-9(14-8)6-15(10)12/h1-6, 13H                                      |
| <b>p-23</b>   |  | 18.3878 | 192.7632 | -4.4081  | 34.9412  | 248.331  | InChI=1S/C12H7N3O/c16-12-8-3-1-2-7-4-5-13-10(7)6-9(8)11-14-15(11)12/h1-6, 13H/b2-1-, 3-1-, 7-2-, 8-3+, 9-6+, 10-6+  |
| <b>x4-26</b>  |  | 5.4209  | 39.1241  | -3.3105  | 173.9208 | 248.3489 | InChI=1S/C12H7N3O/c16-12-8-6-14-15-9(12)3-1-2-7-4-5-13-10(7)11(8)15/h1-6, 13H/b2-1-, 9-3-                           |
| <b>X22-19</b> |  | 21.8182 | 145.537  | -12.1232 | 86.8778  | 248.4024 | InChI=1S/C12H7N3O/c16-12-10-8(3-5-14-10)13-4-1-2-7-6-9-11(7)15(9)12/h1-6, 14H/b2-1-, 13-4+                          |
| <b>p-18</b>   |  | 18.3809 | 192.9279 | -4.414   | 34.9543  | 248.5777 | InChI=1S/C12H7N3O/c16-12-9-6-10-7(4-5-13-10)2-1-3-8(9)11-14-15(11)12/h1-6, 13H/b2-1-, 3-1-, 7-2-, 8-3+, 9-6+, 10-6+ |
| <b>x5-29</b>  |  | 13.1789 | 155.2125 | -7.5702  | 71.0744  | 248.6186 | InChI=1S/C12H7N3O/c16-9-6-8-3-1-2-7-4-5-13-11(7)14-12-10(8)15(9)12/h1-6H, (H, 13, 14)/b3-1-, 7-2-                   |
| <b>H1-76</b>  |  | 4.9197  | 107.4836 | -0.0935  | 111.886  | 248.9923 | InChI=1S/C12H7N3O/c16-10-3-1-2-9-7-4-5-13-11(7)12-14-8(10)6-15(9)12/h1-6, 13H/b3-1-, 9-2-                           |
| <b>X23-40</b> |  | 24.7121 | 139.5452 | -12.0807 | 67.0138  | 249.073  | InChI=1S/C12H7N3O/c16-9-6-7-2-1-4-13-8-3-5-14-10(8)12-11(9)15(7)12/h1-6, 14H/b2-1-, 13-4+                           |
| <b>p11-2</b>  |  | 42.8472 | 204.8605 | -19.4144 | 12.5587  | 249.3673 | InChI=1S/C12H7N3O/c16-12-10-9-3-1-2-7-4-5-13-8(7)6-14-15(9)11(10)12/h1-6, 13H/b2-1-, 9-3-, 14-6-                    |
| <b>F-50</b>   |  | 23.0936 | 225.5882 | -16.0852 | 15.5754  | 249.486  | InChI=1S/C12H7N3O/c16-12-8(10-6-15(10)12)2-1-3-9-7-4-5-13-11(7)14-9/h1-6H, (H, 13, 14)/b3-1-, 8-2+                  |
| <b>p11-4</b>  |  | 12.1768 | 162.1413 | -8.5657  | 60.3536  | 249.4895 | InChI=1S/C12H7N3O/c16-12-8-3-1-2-7-4-5-13-9(7)6-14-15-10(8)11(12)15/h1-6, 13H/b2-1-, 8-3+, 14-6-                    |



|                |                                                                                     |         |          |         |          |          |                                                                                                                 |
|----------------|-------------------------------------------------------------------------------------|---------|----------|---------|----------|----------|-----------------------------------------------------------------------------------------------------------------|
| <b>H11-101</b> |    | 4.0329  | 26.8049  | -1.2942 | 189.3571 | 249.5407 | InChI=1S/C12H7N3O/c16-12-8-6-15-9(2-1-3-10(15)14-12)7-4-5-13-11(7)8/h1-6,13H                                    |
| <b>x7-29</b>   |    | 23.8673 | 165.0777 | -8.2491 | 48.499   | 249.5926 | InChI=1S/C12H7N3O/c16-9-3-1-2-7-4-5-13-10(7)8-6-14-12-11(8)15(9)12/h1-6,13H/h3-1-,7-2-,10-8+                    |
| <b>r-18</b>    |    | 22.2436 | 165.0788 | -12.336 | 53.6117  | 249.7376 | InChI=1S/C12H7N3O/c16-12-8-6-14-11-7(4-5-13-11)2-1-3-9-10(8)15(9)12/h1-6H,(H,13,14)                             |
| <b>C-58</b>    |    | 5.3603  | 41.4412  | -2.1247 | 178.0747 | 250.1303 | InChI=1S/C12H7N3O/c16-12-9-6-10-13-4-1-2-7(9)8-3-5-14-11(8)15(10)12/h1-6,14H/h2-1-,4-1-,7-2-,13-4-,13-10+       |
| <b>o-235</b>   |    | 5.21    | 51.484   | -2.9099 | 166.0265 | 250.1985 | InChI=1S/C12H7N3O/c16-12-11-8(3-4-13-11)15-5-1-2-7-6-9(15)10(7)14-12/h1-6,13H                                   |
| <b>x7-13</b>   |    | 15.8869 | 187.2353 | -2.6093 | 37.7076  | 250.2268 | InChI=1S/C12H7N3O/c16-9-3-1-2-7-4-5-13-11(7)12-10(9)8-6-14-15(8)12/h1-6,13H/h3-1-,7-2-,12-11-                   |
| <b>i-17</b>    |    | 21.8277 | 194.4602 | -2.7117 | 41.8852  | 250.3106 | InChI=1S/C12H7N3O/c16-10-6-9-11-8(15(9)10)2-1-4-13-7-3-5-14-12(7)11/h1-6,14H/h2-1-,4-1-,8-2-,12-11-,13-4-,13-7+ |
| <b>q11-34</b>  |    | 5.9552  | 60.2068  | -2.4695 | 165.1718 | 250.4044 | InChI=1S/C12H7N3O/c16-10-6-8-9-3-1-2-7-4-5-13-11(7)12(14-8)15(9)10/h1-6,13H/h2-1-,9-3-                          |
| <b>B-104</b>   |   | 5.6802  | 142.2327 | -1.7178 | 96.5892  | 250.4420 | InChI=1S/C12H7N3O/c16-12-10-6-9-7(2-1-5-15(12)14-10)8-3-4-13-11(8)9/h1-6,13H/h5-1-,7-2-,9-6-                    |
| <b>H1-24</b>   |  | 9.9967  | 132.6683 | -1.2407 | 92.4927  | 250.4728 | InChI=1S/C12H7N3O/c16-7-2-1-3-8-9-4-5-13-11(9)15-10(6-7)14-12(8)15/h1-6,13H/h2-1-,8-3-,10-6+                    |
| <b>q11-51</b>  |  | 5.9818  | 64.9528  | -3.7205 | 157.5638 | 250.6523 | InChI=1S/C12H7N3O/c16-12-11-10-7(4-5-13-10)2-1-3-9-8(14-11)6-15(9)12/h1-6,13H/h2-1-,9-3-                        |
| <b>x7-45</b>   |  | 5.5433  | 57.8411  | -4.9641 | 171.6764 | 250.75   | InChI=1S/C12H7N3O/c16-8-3-1-2-7-4-5-13-9(7)12-10-11(8)15(12)6-14-10/h1-6,13H/h3-1-,7-2-,12-9-                   |
| <b>q-3</b>     |  | 4.8193  | 82.8594  | -1.8844 | 145.8899 | 250.8262 | InChI=1S/C12H7N3O/c16-11-8-6-15-9(14-12(11)15)3-1-2-7-4-5-13-10(7)8/h1-6,13H/h2-1-,9-3-                         |
| <b>r-1</b>     |  | 7.0467  | 87.4517  | -5.6003 | 147.4985 | 251.1746 | InChI=1S/C12H7N3O/c16-11-8-3-1-2-7-4-5-13-12(7)14-15-6-9(11)10(8)15/h1-6H,(H,13,14)/h3-1-,7-2-                  |
| <b>E-69</b>    |  | 3.3161  | 66.7527  | -1.8883 | 171.0041 | 251.2007 | InChI=1S/C12H7N3O/c16-12-14-9-3-1-2-7-6-10(15(7)12)11-8(9)4-5-13-11/h1-6,13H/h3-1-,7-2-                         |
| <b>q-63</b>    |  | 3.8657  | 76.8125  | -2.6842 | 167.1431 | 251.3735 | InChI=1S/C12H7N3O/c16-12-14-11-9-6-8(15(11)12)3-1-2-7-4-5-13-10(7)9/h1-6,13H/h2-1-,3-1-,7-2-,8-3+,10-9-         |
| <b>i-97</b>    |  | 4.4035  | 56.9392  | -2.0406 | 164.5005 | 251.3736 | InChI=1S/C12H7N3O/c16-12-7-6-8-9(2-4-13-8)15-5-1-3-14-10(7)11(12)15/h1-6,13H                                    |
| <b>n-181</b>   |  | 7.2394  | 117.6548 | -1.1854 | 113.5702 | 251.6484 | InChI=1S/C12H7N3O/c16-12-7-6-14-8-2-1-5-15(12)9-3-4-13-11(9)10(7)8/h1-6,13H/h5-1-,8-2+                          |
| <b>o-174</b>   |  | 3.7657  | 31.5544  | -0.7364 | 186.2093 | 251.7181 | InChI=1S/C12H7N3O/c16-12-7-2-1-5-15-9-3-4-13-11(9)8(14-12)6-10(7)15/h1-6,13H                                    |

|               |  |         |          |          |          |          |                                                                                                          |
|---------------|--|---------|----------|----------|----------|----------|----------------------------------------------------------------------------------------------------------|
| <b>x4-5</b>   |  | 8.0608  | 149.9157 | -6.0502  | 69.3581  | 252.082  | InChI=1S/C12H7N3O/c16-9-6-14-15-11-8(9)3-1-2-7-4-5-13-10(7)12(11)15/h1-6,13H/b2-1-,3-1-,7-2-,8-3-,12-10- |
| <b>n-194</b>  |  | 7.0032  | 185.1097 | -6.1428  | 52.9697  | 252.1672 | InChI=1S/C12H7N3O/c16-12-10-7-2-1-5-15(12)9-3-4-13-8(9)6-14-11(7)10/h1-6,13H/b14-6-                      |
| <b>x22-56</b> |  | 8.5409  | 70.4234  | -5.9156  | 153.3137 | 252.1868 | InChI=1S/C12H7N3O/c16-11-7-2-1-4-13-8-3-5-14-12(8)15-9(7)6-10(11)15/h1-6,14H/b2-1-,13-4-                 |
| <b>A1-14</b>  |  | 23.8825 | 187.8476 | -7.7691  | 28.1988  | 252.2367 | InChI=1S/C12H7N3O/c16-9-6-13-4-1-2-8-7-3-5-14-10(7)12-11(8)15(9)12/h1-6,14H/b4-1-,8-2-,13-6-             |
| <b>q1-15</b>  |  | 19.1588 | 138.1681 | -13.1283 | 83.3674  | 252.2892 | InChI=1S/C12H7N3O/c16-12-10-7(4-5-13-10)2-1-3-9-14-11(12)8-6-15(8)9/h1-6,13H/b2-1-,9-3+                  |
| <b>i-26</b>   |  | 5.7249  | 73.7027  | -5.0045  | 171.5353 | 252.3243 | InChI=1S/C12H7N3O/c16-12-7-2-1-4-13-9-3-5-14-10(9)11-8(7)6-15(11)12/h1-6,14H/b4-1-,7-2-,11-10-,13-9+     |
| <b>n-193</b>  |  | 6.8514  | 44.5674  | -1.9978  | 165.742  | 252.4068 | InChI=1S/C12H7N3O/c16-12-11-9-7(6-14-12)2-1-5-15(11)8-3-4-13-10(8)9/h1-6,13H                             |
| <b>x4-21</b>  |  | 9.9261  | 101.8665 | -2.1327  | 132.8988 | 252.4378 | InChI=1S/C12H7N3O/c16-12-9-10-7(4-5-13-10)2-1-3-8-6-14-11(9)15(8)12/h1-6,13H/b2-1-,3-1-,7-2-,8-3-,10-9-  |
| <b>x23-38</b> |  | 14.2054 | 177.3543 | -11.6833 | 45.1948  | 252.7335 | InChI=1S/C12H7N3O/c16-12-10-8(3-5-14-10)13-4-1-2-7-6-9-11(12)15(7)9/h1-6,14H/b2-1-,13-4+                 |
| <b>x6-25</b>  |  | 26.4263 | 162.6429 | -13.7198 | 64.5062  | 252.8078 | InChI=1S/C12H7N3O/c16-10-3-1-2-7-4-5-13-8(7)6-9-11-12(14-9)15(10)11/h1-6,13H/b3-1-,7-2-,8-6-             |
| <b>B-17</b>   |  | 4.2555  | 111.9752 | -0.6511  | 112.7018 | 253.0623 | InChI=1S/C12H7N3O/c16-10-6-8-11-7(3-4-13-11)9-2-1-5-15(10)12(8)14-9/h1-6,13H                             |
| <b>p1-4</b>   |  | 6.925   | 49.039   | -6.2115  | 177.8933 | 253.1348 | InChI=1S/C12H7N3O/c16-10-3-1-2-7-4-5-13-12(7)11-8-6-9(11)15(10)14-8/h1-6,13H/b3-1-,7-2-,12-11+           |
| <b>k-35</b>   |  | 5.2902  | 53.5092  | -4.9584  | 182.6693 | 253.157  | InChI=1S/C12H7N3O/c16-12-9-6-8-10(12)11-7(2-4-14-11)13-3-1-5-15(8)9/h1-6,14H/b5-1-,13-3-                 |
| <b>C-31</b>   |  | 4.5094  | 152.1671 | -1.1217  | 91.7676  | 253.4230 | InChI=1S/C12H7N3O/c16-12-9-6-15(12)11-8(2-1-4-13-9)7-3-5-14-10(7)11/h1-6,14H/b2-1-,13-4-                 |
| <b>x22-26</b> |  | 5.8647  | 44.0112  | -5.9157  | 193.9551 | 253.4457 | InChI=1S/C12H7N3O/c16-12-8-6-10-7(8)2-1-4-13-9-3-5-14-11(9)15(10)12/h1-6,14H/b2-1-,13-4-                 |
| <b>x3-1</b>   |  | 48.7512 | 192.1299 | -28.4528 | 17.1455  | 253.4581 | InChI=1S/C12H7N3O/c16-11-9-7(10(9)11)6-15-5-1-3-13-12-8(15)2-4-14-12/h1-6,14H                            |
| <b>H1-10</b>  |  | 4.6118  | 153.7749 | -2.0879  | 92.8563  | 253.4924 | InChI=1S/C12H7N3O/c16-10-3-1-2-7-8-4-5-13-12(8)15(10)9-6-14-11(7)9/h1-6,13H/b3-1-,7-2-                   |
| <b>o-48</b>   |  | 6.0904  | 119.4549 | -2.3993  | 100.366  | 253.5482 | InChI=1S/C12H7N3O/c16-12-8-6-7-2-1-5-15(7)9-3-4-13-10(9)11(12)14-8/h1-6,13H/b8-6-                        |
| <b>H1-114</b> |  | 8.0294  | 68.666   | -2.9376  | 150.7624 | 253.7246 | InChI=1S/C12H7N3O/c16-10-3-1-2-9-7-4-5-13-11(7)14-12-8(10)6-15(9)12/h1-6,13H/b3-1-,9-2-                  |

|               |                                                                                     |         |          |          |          |          |                                                                                                                |
|---------------|-------------------------------------------------------------------------------------|---------|----------|----------|----------|----------|----------------------------------------------------------------------------------------------------------------|
| <b>n-45</b>   |    | 48.0069 | 205.9024 | -28.6904 | 14.2004  | 253.9365 | InChI=1S/C12H7N3O/c16-11-9-7(10(9)11)2-1-5-15-6-14-12-8(15)3-4-13-12/h1-6,13H/b5-1-                            |
| <b>B-240</b>  |    | 4.6792  | 46.2645  | -3.0613  | 175.6048 | 254.0438 | InChI=1S/C12H7N3O/c16-12-10-8(3-4-13-10)7-2-1-5-15-6-9(7)11(15)14-12/h1-6,13H                                  |
| <b>x6-9</b>   |    | 11.5288 | 167.7379 | -9.8669  | 60.3518  | 254.0903 | InChI=1S/C12H7N3O/c16-10-3-1-2-7-4-5-13-8(7)6-9-11-12(10)15(11)14-9/h1-6,13H/b3-1-,7-2-,9-6-                   |
| <b>H1-92</b>  |    | 20.5394 | 223.2765 | -16.7461 | 19.5878  | 254.0922 | InChI=1S/C12H7N3O/c16-10-3-1-2-7(10)8-4-5-13-11(8)14-12-9-6-15(9)12/h1-6,13H/b14-12+                           |
| <b>s12-27</b> |    | 29.0318 | 172.0983 | -14.2302 | 54.3891  | 254.2569 | InChI=1S/C12H7N3O/c16-10-6-9-7(4-5-13-9)2-1-3-8-11-12(14-8)15(10)11/h1-6,13H/b3-1-,7-2-,9-6+                   |
| <b>E-68</b>   |    | 4.947   | 72.2397  | -2.0556  | 164.0325 | 254.6338 | InChI=1S/C12H7N3O/c16-12-14-9-2-1-3-10-8(6-15(10)12)11-7(9)4-5-13-11/h1-6,13H/b2-1-,10-3-,14-9-                |
| <b>H-21</b>   |    | 6.9076  | 118.9248 | -0.9475  | 107.5276 | 254.8234 | InChI=1S/C12H7N3O/c16-12-7-2-1-3-9-8-4-5-13-11(8)14(10(6-7)15(9)12/h1-6H,(11,13,14)                            |
| <b>H-156</b>  |    | 5.9188  | 100.8961 | -2.1218  | 108.01   | 254.8435 | InChI=1S/C12H7N3O/c16-12-14-10-7-2-1-3-8(10)9-4-5-13-11(9)15(12)6-7/h1-6,13H                                   |
| <b>X22-25</b> |    | 13.0892 | 146.603  | -8.229   | 88.2361  | 254.9007 | InChI=1S/C12H7N3O/c16-12-10-7-6-15(12)9(10)2-1-4-13-8-3-5-14-11(7)8/h1-6,14H/b2-1-,13-4+                       |
| <b>i-29</b>   |   | 24.6233 | 161.0985 | -14.1982 | 57.5133  | 254.9335 | InChI=1S/C12H7N3O/c16-12-7-2-1-4-13-8-3-5-14-11(8)10(7)9-6-15(9)12/h1-6,14H/b2-1-,4-1-,7-2-,11-10-,13-4-,13-8- |
| <b>H-43</b>   |  | 6.5888  | 190.3462 | -5.8819  | 52.3769  | 255.1843 | InChI=1S/C12H7N3O/c16-12-10-7-6-8-9(2-4-13-8)15(12)5-1-3-14-11(7)10/h1-6,13H/b5-1-,14-3-                       |
| <b>H-154</b>  |  | 16.2898 | 200.6342 | -10.7414 | 33.6743  | 255.4128 | InChI=1S/C12H7N3O/c16-12-14-9-6-7(9)2-1-3-10-8-4-5-13-11(8)15(10)12/h1-6,13H/b2-1-,10-3-,14-9-                 |
| <b>x6-23</b>  |  | 17.8619 | 161.4558 | -15.1498 | 57.4501  | 255.4637 | InChI=1S/C12H7N3O/c16-9-3-1-2-7-4-5-13-8(7)6-14-12-11-10(9)15(11)12/h1-6,13H/b3-1-,7-2-,8-6-,14-12-            |
| <b>o-238</b>  |  | 12.9095 | 185.9725 | -7.7885  | 33.5751  | 255.5117 | InChI=1S/C12H7N3O/c16-12-10-9(3-4-13-10)15-5-1-2-7-6-8(7)11(15)14-12/h1-6,13H                                  |
| <b>i-92</b>   |  | 9.9306  | 139.8422 | 0.4315   | 71.8231  | 256.0786 | InChI=1S/C12H7N3O/c16-12-8-6-7-10-9(2-4-14-10)15(11(7)12)5-1-3-13-8/h1-6,14H/b2-1-,13-3-                       |
| <b>o-161</b>  |  | 20.458  | 147.6474 | -14.1842 | 76.9119  | 256.3173 | InChI=1S/C12H7N3O/c16-12-7-2-1-5-15(12)10-3-4-13-11(10)14-9-6-8(7)9/h1-6,13H/b14-9-                            |
| <b>X23-35</b> |  | 30.1852 | 215.028  | -12.0192 | 17.1317  | 256.5074 | InChI=1S/C12H7N3O/c16-11-8-6-7-2-1-4-13-9-3-5-14-12(9)15(7)10(8)11/h1-6,14H/b2-1-,13-4+                        |
| <b>q-51</b>   |  | 4.5349  | 127.3422 | -1.1165  | 116.5954 | 256.5454 | InChI=1S/C12H7N3O/c16-12-9-3-1-2-7-4-5-13-10(7)8-6-15(12)11(8)14-9/h1-6,14H/b2-1-,9-3-                         |
| <b>n-179</b>  |  | 7.5424  | 188.5377 | -6.3193  | 52.1952  | 257.1546 | InChI=1S/C12H7N3O/c16-12-10-7-2-1-5-15(12)9-3-4-13-11(9)14-6-8(7)10/h1-6,13H/b14-6-                            |

|               |                                                                                     |         |          |          |          |          |                                                                                                                 |
|---------------|-------------------------------------------------------------------------------------|---------|----------|----------|----------|----------|-----------------------------------------------------------------------------------------------------------------|
| <b>k-44</b>   |    | 8.3404  | 75.7174  | -6.0544  | 153.939  | 257.2    | InChI=1S/C12H7N3O/c16-12-7-6-9-10(7)11-8(2-4-14-11)13-3-1-5-15(9)12/h1-6,14H/b5-1-,13-3+                        |
| <b>X22-36</b> |    | 5.7993  | 125.0833 | -4.5824  | 117.772  | 257.2844 | InChI=1S/C12H7N3O/c16-12-7-2-1-4-13-8-3-5-14-11(8)10-6-9(7)15(10)12/h1-6,14H/b2-1-,4-1-,7-2-,11-10+,13-4-,13-8- |
| <b>H1-104</b> |    | 25.5643 | 130.7463 | -18.955  | 86.2928  | 257.2864 | InChI=1S/C12H7N3O/c16-10-3-1-2-7(6-9-12-14-15(9)12)8-4-5-13-11(8)10/h1-6,13H/b2-1-,4-1-,7-2-,11-10+,13-4-,13-8- |
| <b>H1-91</b>  |    | 20.656  | 140.3052 | -10.9525 | 101.7782 | 257.3211 | InChI=1S/C12H7N3O/c16-10-3-1-2-7(10)8-4-5-13-11(8)15-6-9-12(15)14-9/h1-6,13H                                    |
| <b>o-46</b>   |    | 5.0864  | 97.5237  | -1.1765  | 133.7896 | 257.4603 | InChI=1S/C12H7N3O/c16-12-7-6-14-11(12)10-9(3-4-13-10)15-5-1-2-8(7)15/h1-6,13H                                   |
| <b>o-236</b>  |    | 12.759  | 83.607   | -0.969   | 117.6476 | 257.5933 | InChI=1S/C12H7N3O/c16-12-11-9(3-4-13-11)15-5-1-2-7-8(14-12)6-10(7)15/h1-6,13H/b14-8+                            |
| <b>q1-41</b>  |    | 5.6011  | 92.2448  | -4.349   | 150.0649 | 257.6397 | InChI=1S/C12H7N3O/c16-12-8-6-10-14-9(15(8)10)3-1-2-7-4-5-13-11(7)12/h1-6,13H/b2-1-,9-3-                         |
| <b>q-44</b>   |   | 17.6711 | 199.3149 | -2.1887  | 34.9525  | 257.8894 | InChI=1S/C12H7N3O/c16-10-6-9-8(12-14-15(10)12)3-1-2-7-4-5-13-11(7)9/h1-6,13H                                    |
| <b>H1-33</b>  |  | 27.4289 | 142.9561 | -11.8093 | 61.8563  | 257.954  | InChI=1S/C12H7N3O/c16-9-6-7-10-11(7)13-3-1-5-15(9)8-2-4-14-12(8)10/h1-6,14H/b5-1-,13-3-                         |
| <b>q11-6</b>  |  | 6.7384  | 50.826   | -4.5119  | 171.2138 | 258.241  | InChI=1S/C12H7N3O/c16-12-8-6-15-9(8)3-1-2-7-4-5-13-10(7)11(15)14-12/h1-6,13H/b2-1-,9-3-                         |
| <b>k-29</b>   |  | 5.2626  | 55.3263  | -4.8876  | 188.4584 | 258.3039 | InChI=1S/C12H7N3O/c16-9-6-8-10-11-7(2-4-14-11)13-3-1-5-15(8)12(9)10/h1-6,14H/b5-1-,13-3-                        |
| <b>n11-49</b> |  | 27.0632 | 161.0275 | -15.9562 | 64.5644  | 258.3346 | InChI=1S/C12H7N3O/c16-12-8-3-1-2-7-4-5-13-10(7)11(14-8)9-6-15(9)12/h1-6,13H/b2-1-,3-1-,7-2-,8-3-,11-10+         |
| <b>o-182</b>  |  | 6.9611  | 43.412   | -1.7331  | 173.4356 | 258.5233 | InChI=1S/C12H7N3O/c16-11-8-6-14-12-7(8)2-1-5-15(12)9-3-4-13-10(9)11/h1-6,13H                                    |
| <b>G1-105</b> |  | 12.5475 | 144.813  | -7.4628  | 82.0408  | 258.6533 | InChI=1S/C12H7N3O/c16-7-2-1-3-8-9-4-5-13-11(9)15-10(8)12(15)14-6-7/h1-6,13H/b2-1-,8-3-,14-6-                    |
| <b>A2-72</b>  |  | 6.6669  | 146.1773 | -1.6266  | 92.9011  | 258.6606 | InChI=1S/C12H7N3O/c16-11-8-6-10(11)15-9(2-1-4-13-8)7-3-5-14-12(7)15/h1-6,14H/b4-1-,9-2-,13-8+                   |
| <b>F-17</b>   |  | 6.9231  | 101.0194 | -2.8697  | 134.1431 | 258.8913 | InChI=1S/C12H7N3O/c16-12-9-6-7-2-1-3-10(9)15(12)14-11-8(7)4-5-13-11/h1-6H,13,14/b8-7+                           |
| <b>X23-19</b> |  | 5.3187  | 152.751  | -2.6261  | 93.7299  | 259.0993 | InChI=1S/C12H7N3O/c16-12-10-9-6-7(15(9)12)2-1-4-13-8-3-5-14-11(8)10/h1-6,14H/b2-1-,4-1-,7-2-,11-10+,13-4-,13-8- |
| <b>n-34</b>   |  | 48.4137 | 209.511  | -28.6597 | 14.1045  | 259.3571 | InChI=1S/C12H7N3O/c16-12-10-7(11(10)12)2-1-5-15-9-3-4-13-8(9)6-14-15/h1-6,13H/b5-1-                             |
| <b>p1-15</b>  |  | 10.0152 | 159.036  | -3.4143  | 75.0497  | 259.4243 | InChI=1S/C12H7N3O/c16-10-3-1-2-7-4-5-13-11(7)8-6-9-12(8)14-15(9)10/h1-6,13H/b3-1-,7-2-,11-8-                    |

|               |                                                                                     |                    |          |           |           |           |           |                                                                                                                    |
|---------------|-------------------------------------------------------------------------------------|--------------------|----------|-----------|-----------|-----------|-----------|--------------------------------------------------------------------------------------------------------------------|
| <b>o-191</b>  |    | $C_{22}H_{15}N_2O$ | 38, 1671 | 212, 3142 | -17, 1727 | 16, 2177  | 259, 513  | InChI=1S/C12H7N3O/c16-10-6-7(10)14-12-8-2-1-5-15(8)9-3-4-13-11(9)12/h1-6, 13H/b14-12+                              |
| <b>H11-79</b> |    | $C_{22}H_{15}N_2O$ | 34, 8458 | 195, 5731 | -19, 0718 | 29, 2528  | 259, 6126 | InChI=1S/C12H7N3O/c16-12-11-8(4-5-13-11)7-2-1-3-9(7)14-10-6-15(10)12/h1-6, 13H/b14-9-                              |
| <b>H-158</b>  |    | $C_{22}H_{15}N_2O$ | 8, 1429  | 144, 3713 | -4, 3734  | 90, 116   | 259, 8753 | InChI=1S/C12H7N3O/c16-12-14-11-10-9(4-5-13-10)7-2-1-3-8(6-7)15(11)12/h1-6, 13H                                     |
| <b>q1-10</b>  |    | $C_{22}H_{15}N_2O$ | 13, 2267 | 201, 5409 | -10, 7817 | 38, 7069  | 259, 9083 | InChI=1S/C12H7N3O/c16-12-8(11-9-6-15(9)14-11)3-1-2-7-4-5-13-10(7)12/h1-6, 13H                                      |
| <b>n-197</b>  |    | $C_{22}H_{15}N_2O$ | 4, 5189  | 88, 5521  | -3, 167   | 148, 4849 | 259, 931  | InChI=1S/C12H7N3O/c16-12-8(6-14-12)11-7-2-1-5-15(11)9-3-4-13-10(7)9/h1-6, 13H/b11-8-                               |
| <b>l-24</b>   |    | $C_{22}H_{15}N_2O$ | 6, 1072  | 144, 9669 | -1, 4745  | 93, 8383  | 260, 203  | InChI=1S/C12H7N3O/c16-12-7-6-8(12)13-3-1-5-15-9-2-4-14-10(9)11(7)15/h1-6, 14H/b5-1-, 11-7-, 13-3-                  |
| <b>q11-47</b> |    | $C_{22}H_{15}N_2O$ | 24, 1679 | 185, 7488 | -17, 2976 | 54, 5068  | 260, 257  | InChI=1S/C12H7N3O/c16-12-14-11-10-7(4-5-13-10)2-1-3-8-6-9(8)15(11)12/h1-6, 13H/b2-1-, 8-3-                         |
| <b>H1-79</b>  |    | $C_{22}H_{15}N_2O$ | 13, 901  | 230, 7199 | -13, 1747 | 26, 1209  | 260, 404  | InChI=1S/C12H7N3O/c16-11-3-1-2-7(11)8-4-5-13-12(8)15-10-6-9(10)14-15/h1-6, 13H                                     |
| <b>A-25</b>   |   | $C_{22}H_{15}N_2O$ | 5, 902   | 196, 5552 | -3, 4926  | 39, 3143  | 260, 5356 | InChI=1S/C12H7N3O/c16-9-6-14-12-11-8(2-1-5-15(11)12)7-3-4-13-10(7)9/h1-6, 13H/b14-6-                               |
| <b>G1-92</b>  |  | $C_{22}H_{15}N_2O$ | 12, 9713 | 200, 6004 | -7, 4304  | 28, 9174  | 260, 6451 | InChI=1S/C12H7N3O/c16-10-3-1-2-8-7-4-5-13-11(7)12-9(6-14-10)15(8)12/h1-6, 13H/b3-1-, 8-2-, 14-6-                   |
| <b>p-26</b>   |  | $C_{22}H_{15}N_2O$ | 8, 8996  | 180, 233  | -1, 4115  | 62, 443   | 260, 8044 | InChI=1S/C12H7N3O/c16-12-8-3-1-2-7-4-5-13-9(7)6-10-14-11(8)15(10)12/h1-6, 13H/b2-1-, 3-1-, 7-2-, 8-3-, 9-6-, 10-6+ |
| <b>q11-8</b>  |  | $C_{22}H_{15}N_2O$ | 7, 3917  | 84, 0495  | -2, 5999  | 151, 7288 | 260, 8485 | InChI=1S/C12H7N3O/c16-12-9-6-8-3-1-2-7-4-5-13-10(7)11(12)14-15(8)9/h1-6, 13H/b2-1-, 8-3-                           |
| <b>X22-1</b>  |  | $C_{22}H_{15}N_2O$ | 19, 9243 | 196, 3831 | -11, 4111 | 56, 1196  | 260, 9643 | InChI=1S/C12H7N3O/c16-10-6-9-12(15(9)10)7-2-1-4-13-8-3-5-14-11(7)8/h1-6, 14H/b12-7-                                |
| <b>l-85</b>   |  | $C_{22}H_{15}N_2O$ | 10, 2578 | 131, 5551 | -1, 3562  | 93, 7602  | 261, 0058 | InChI=1S/C12H7N3O/c16-12-7-6-13-3-1-5-15-8-2-4-14-10(8)9(7)11(12)15/h1-6, 14H/b5-1-, 7-6-, 13-3-                   |
| <b>A1-5</b>   |  | $C_{22}H_{15}N_2O$ | 8, 253   | 134, 7216 | -0, 6129  | 99, 4584  | 261, 0967 | InChI=1S/C12H7N3O/c16-12-9-7-2-1-4-13-6-15(12)11(9)10-8(7)3-5-14-10/h1-6, 14H/b4-1-, 7-2-, 13-6-                   |
| <b>H-124</b>  |  | $C_{22}H_{15}N_2O$ | 6, 4236  | 108, 1481 | -0, 8204  | 119, 6288 | 261, 2754 | InChI=1S/C12H7N3O/c16-12-9-6-7-2-1-3-10(15(7)12)8-4-5-13-11(8)14-9/h1-6H, (H, 13, 14)                              |
| <b>D-7</b>    |  | $C_{22}H_{15}N_2O$ | 4, 6561  | 109, 5842 | -0, 2227  | 125, 2347 | 261, 3295 | InChI=1S/C12H7N3O/c16-12-8-6-15-9(2-1-4-13-8)7-3-5-14-10(7)11(12)15/h1-6, 14H/b2-1-, 13-4+                         |
| <b>H1-47</b>  |  | $C_{22}H_{15}N_2O$ | 4, 7989  | 32, 0724  | -2, 0761  | 195, 4624 | 261, 7746 | InChI=1S/C12H7N3O/c16-10-3-1-2-7-8-4-5-13-11(8)15-6-9(7)14-12(10)15/h1-6, 13H/b3-1-, 7-2-                          |
| <b>H1-41</b>  |  | $C_{22}H_{15}N_2O$ | 10, 7754 | 131, 1185 | 0, 5318   | 90, 9029  | 262, 0923 | InChI=1S/C12H7N3O/c16-11-3-1-2-9-7-4-5-13-12(7)10-6-8(11)14-15(9)10/h1-6, 13H/b3-1-, 9-2-                          |

|               |                                                                                     |         |          |          |          |          |                                                                                                            |
|---------------|-------------------------------------------------------------------------------------|---------|----------|----------|----------|----------|------------------------------------------------------------------------------------------------------------|
| <b>H-37</b>   |    | 4.6245  | 156.2567 | -1.1982  | 81.6515  | 262.1231 | InChI=1S/C12H7N3O/c16-12-10-7-6-8(10)13-3-1-5-15(12)9-2-4-14-11(7)9/h1-6,14H/b5-1-,13-3-                   |
|               | $C_{12}H_7N_3O$                                                                     |         |          |          |          |          |                                                                                                            |
| <b>p1-18</b>  |    | 6.6031  | 57.268   | -4.9208  | 176.3891 | 262.3674 | InChI=1S/C12H7N3O/c16-9-3-1-2-7-4-5-13-10(7)12-11-8(9)6-15(12)14-11/h1-6,13H/b3-1-,7-2-,12-10-             |
|               | $C_{12}H_7N_3O$                                                                     |         |          |          |          |          |                                                                                                            |
| <b>E-10</b>   |    | 5.2814  | 92.9363  | -1.317   | 139.6695 | 262.4445 | InChI=1S/C12H7N3O/c16-12-10-3-1-2-8-7-4-5-13-9(7)6-11(12)15(10)14-8/h1-6,13H                               |
|               | $C_{12}H_7N_3O$                                                                     |         |          |          |          |          |                                                                                                            |
| <b>D-17</b>   |    | 6.8018  | 135.1242 | -1.3988  | 108.6573 | 262.5971 | InChI=1S/C12H7N3O/c16-10-6-9-12-11-7(3-5-14-11)8(15(9)10)2-1-4-13-12/h1-6,14H/b2-1-,4-1-,8-2-,13-4-,13-12+ |
|               | $C_{12}H_7N_3O$                                                                     |         |          |          |          |          |                                                                                                            |
| <b>H1-89</b>  |    | 30.1418 | 164.2134 | -20.1493 | 71.7347  | 262.687  | InChI=1S/C12H7N3O/c16-11-3-1-2-8(11)7-4-5-13-9(7)6-10-12-14-15(10)12/h1-6,13H/b10-6-                       |
|               | $C_{12}H_7N_3O$                                                                     |         |          |          |          |          |                                                                                                            |
| <b>B-51</b>   |    | 6.2016  | 30.9990  | -2.3326  | 189.5883 | 262.7778 | InChI=1S/C12H7N3O/c16-10-6-9-7-2-1-5-15(9)12(14-10)11-8(7)3-4-13-11/h1-6,13H                               |
|               | $C_{12}H_7N_3O$                                                                     |         |          |          |          |          |                                                                                                            |
| <b>o-56</b>   |    | 20.4834 | 198.8954 | -14.0958 | 40.5978  | 262.8579 | InChI=1S/C12H7N3O/c16-10-8-6-7(8)2-1-5-15-9-3-4-13-11(9)14-12(10)15/h1-6,13H/b5-1-,7-2-                    |
|               | $C_{12}H_7N_3O$                                                                     |         |          |          |          |          |                                                                                                            |
| <b>H11-85</b> |    | 6.4286  | 35.297   | -2.758   | 195.489  | 263.0725 | InChI=1S/C12H7N3O/c16-12-9-3-1-2-7-6-10(15(12)14-7)11-8(9)4-5-13-11/h1-6,13H/b2-1-,9-3-                    |
|               | $C_{12}H_7N_3O$                                                                     |         |          |          |          |          |                                                                                                            |
| <b>X22-59</b> |    | 20.3671 | 143.2058 | -19.6823 | 95.5263  | 263.0896 | InChI=1S/C12H7N3O/c16-12-7(11-9-6-15(9)11)2-1-4-13-8-3-5-14-10(8)12/h1-6,14H/b2-1-,11-7-,13-4-             |
|               | $C_{12}H_7N_3O$                                                                     |         |          |          |          |          |                                                                                                            |
| <b>H-49</b>   |   | 25.4235 | 132.0458 | -16.6204 | 110.4888 | 263.0973 | InChI=1S/C12H7N3O/c16-12-8-6-7(8)10-11-9(2-4-14-11)15(12)5-1-3-13-10/h1-6,14H/b5-1-,13-3+                  |
|               | $C_{12}H_7N_3O$                                                                     |         |          |          |          |          |                                                                                                            |
| <b>p1-46</b>  |  | 24.8224 | 130.8342 | -11.4915 | 111.1514 | 263.143  | InChI=1S/C12H7N3O/c16-10-3-1-2-7-4-5-13-11(7)8-6-9-14-12(8)15(9)10/h1-6,13H/b3-1-,7-2-,11-8+               |
|               | $C_{12}H_7N_3O$                                                                     |         |          |          |          |          |                                                                                                            |
| <b>s11-62</b> |  | 18.3945 | 149.4417 | -12.2035 | 74.974   | 263.1573 | InChI=1S/C12H7N3O/c16-12-8-3-1-2-7-4-5-13-10(7)11(12)15-6-9(15)14-8/h1-6,13H/b3-1-,7-2-,11-10-             |
|               | $C_{12}H_7N_3O$                                                                     |         |          |          |          |          |                                                                                                            |
| <b>j-5</b>    |  | 17.1725 | 209.2014 | -10.0568 | 27.5804  | 263.1925 | InChI=1S/C12H7N3O/c16-12-9-2-1-4-13-7-3-5-14-8(7)6-10-11(12)15(9)10/h1-6,14H/b4-1-,8-6-,9-2-,13-7+         |
|               | $C_{12}H_7N_3O$                                                                     |         |          |          |          |          |                                                                                                            |
| <b>x7-14</b>  |  | 15.3351 | 182.0236 | -7.5145  | 61.3871  | 263.2702 | InChI=1S/C12H7N3O/c16-9-3-1-2-7-4-5-13-11(7)10-8-6-14-15(9)12(8)10/h1-6,13H/b3-1-,7-2-,11-10+              |
|               | $C_{12}H_7N_3O$                                                                     |         |          |          |          |          |                                                                                                            |
| <b>p1-39</b>  |  | 20.5694 | 225.0862 | -16.4734 | 16.0036  | 263.3057 | InChI=1S/C12H7N3O/c16-9-3-1-2-7-4-5-13-10(7)11(9)14-12-8-6-15(8)12/h1-6,13H/b14-12+                        |
|               | $C_{12}H_7N_3O$                                                                     |         |          |          |          |          |                                                                                                            |
| <b>H11-61</b> |  | 5.5278  | 108.7324 | -1.5361  | 110.77   | 263.3921 | InChI=1S/C12H7N3O/c16-11-6-9-7-2-1-3-10(9)14-15(11)12-8(7)4-5-13-12/h1-6,13H                               |
|               | $C_{12}H_7N_3O$                                                                     |         |          |          |          |          |                                                                                                            |
| <b>X22-23</b> |  | 14.2153 | 171.8228 | -7.4163  | 71.9234  | 263.5907 | InChI=1S/C12H7N3O/c16-12-10-7-2-1-4-13-9-3-5-14-11(9)15(12)6-8(7)10/h1-6,14H/b2-1-,13-4-                   |
|               | $C_{12}H_7N_3O$                                                                     |         |          |          |          |          |                                                                                                            |
| <b>q-58</b>   |  | 5.923   | 157.99   | -2.4029  | 89.5247  | 263.7001 | InChI=1S/C12H7N3O/c16-12-8-3-1-2-7-4-5-13-10(7)9-6-15(12)11(8)14-9/h1-6,13H/b2-1-,8-3+                     |
|               | $C_{12}H_7N_3O$                                                                     |         |          |          |          |          |                                                                                                            |
| <b>i-6</b>    |  | 7.2029  | 175.8223 | -3.197   | 54.6172  | 263.9338 | InChI=1S/C12H7N3O/c16-12-8-2-1-4-13-7-3-5-14-11(7)9-6-10(12)15(8)9/h1-6,14H/b4-1-,8-2-,11-9+,13-7+         |
|               | $C_{12}H_7N_3O$                                                                     |         |          |          |          |          |                                                                                                            |

|                |                                                                                     |         |          |          |          |          |                                                                                                                     |
|----------------|-------------------------------------------------------------------------------------|---------|----------|----------|----------|----------|---------------------------------------------------------------------------------------------------------------------|
| <b>x6-31</b>   | 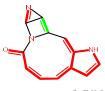   | 21.6554 | 148.8334 | -10.9746 | 95.9225  | 264.1004 | InChI=1S/C12H7N3O/c16-10-3-1-2-7-4-5-13-8(7)6-9-11-12(14-11)15(9)10/h1-6,13H/h3-1-,7-2-,8-6+                        |
| <b>n-51</b>    |    | 34.102  | 207.3871 | -17.9195 | 21.67    | 264.3604 | InChI=1S/C12H7N3O/c16-12-10-9-2-1-5-15(9)8-3-4-13-7(8)6-14-11(10)12/h1-6,13H/h14-6-                                 |
| <b>x4-63</b>   |    | 12.0486 | 156.3884 | -7.6906  | 84.8926  | 264.4537 | InChI=1S/C12H7N3O/c16-12-14-6-8-10-7(4-5-13-10)2-1-3-9-11(8)15(9)12/h1-6,13H/h2-1-,3-1-,7-2-,9-3+,10-8+             |
| <b>H-114</b>   |    | 5.0618  | 78.2275  | -2.1214  | 159.683  | 264.6516 | InChI=1S/C12H7N3O/c16-12-11-7-2-1-3-10(15)(12)14-11)8-4-5-13-9(8)6-7/h1-6,13H/h2-1-,3-1-,7-2-,9-6+,10-3-,10-8-      |
| <b>p1-5</b>    |    | 8.0875  | 63.9747  | -5.5327  | 160.1358 | 264.8685 | InChI=1S/C12H7N3O/c16-10-3-1-2-7-4-5-13-11(7)12-8-6-9(10)15(12)14-8/h1-6,13H/h3-1-,7-2-,12-11+                      |
| <b>X-26</b>    |    | 7.2363  | 194.8996 | -3.5280  | 37.1332  | 265.0089 | InChI=1S/C12H7N3O/c16-12-11-10-9-8(3-5-13-9)7(6-15(10)11)2-1-4-14-12/h1-6,13H/h2-1-,14-4-                           |
| <b>X-44</b>    |    | 7.2359  | 194.8999 | -3.5295  | 37.1377  | 265.0089 | InChI=1S/C12H7N3O/c16-12-11-10-9-8(3-5-13-9)7(6-15(10)11)2-1-4-14-12/h1-6,13H/h2-1-,14-4+                           |
| <b>H11-132</b> |    | 38.591  | 207.9669 | -17.5451 | 21.3116  | 265.0898 | InChI=1S/C12H7N3O/c16-11-6-10(11)15-12-8(4-5-13-12)7-2-1-3-9(7)14-15/h1-6,13H                                       |
| <b>H-121</b>   |   | 5.1059  | 77.9291  | -2.1462  | 160.2427 | 265.1049 | InChI=1S/C12H7N3O/c16-12-11-9-3-1-2-7(15)(12)14-11)6-10-8(9)4-5-13-10/h1-6,13H/h2-1-,3-1-,7-2-,7-6-,9-3-,9-8-,10-6+ |
| <b>q1-2</b>    |  | 14.1784 | 226.9194 | -13.1928 | 21.0411  | 265.1164 | InChI=1S/C12H7N3O/c16-12-9(15-10-6-8(10)14-15)3-1-2-7-4-5-13-11(7)12/h1-6,13H                                       |
| <b>o-164</b>   |  | 5.1972  | 100.7554 | -2.1069  | 132.8425 | 265.1308 | InChI=1S/C12H7N3O/c16-12-7-2-1-5-15-6-8(10(7)14-12)11-9(15)3-4-13-11/h1-6,13H/h5-1-,7-2+                            |
| <b>i-30</b>    |  | 7.9178  | 164.4559 | -2.6681  | 83.6337  | 265.1378 | InChI=1S/C12H7N3O/c16-12-7-2-1-4-13-8-3-5-14-11(8)10-6-9(7)15(10)12/h1-6,14H/h2-1-,4-1-,7-2-,11-10+,13-4-,13-8+     |
| <b>x9-31</b>   |  | 16.1107 | 174.6704 | -7.08    | 67.0555  | 265.2259 | InChI=1S/C12H7N3O/c16-12-10-7(4-5-13-10)2-1-3-8-11-9(6-14-8)15(11)12/h1-6,13H/h2-1-,8-3+                            |
| <b>A2-15</b>   |  | 6.5305  | 132.3135 | -1.8611  | 114.3836 | 265.3256 | InChI=1S/C12H7N3O/c16-10-6-9-7-2-1-4-14-12(15(9)10)11-8(7)3-5-13-11/h1-6,13H/h2-1-,4-1-,7-2-,14-4-,14-12+           |
| <b>H-15</b>    |  | 7.4784  | 115.4107 | -1.2753  | 124.0781 | 265.4118 | InChI=1S/C12H7N3O/c16-10-7-2-1-3-9-8-4-5-13-11(8)15(9)12(10)14-6-7/h1-6,13H/h2-1-,9-3-                              |
| <b>G1-103</b>  |  | 6.8029  | 173.9611 | -2.8735  | 82.1857  | 265.6056 | InChI=1S/C12H7N3O/c16-10-3-1-2-7-8-4-5-13-11(8)15(10)12-9(7)6-14-12/h1-6,13H/h3-1-,7-2+                             |
| <b>p1-2</b>    |  | 14.3271 | 226.7848 | -13.1853 | 22.8881  | 265.733  | InChI=1S/C12H7N3O/c16-10-3-1-2-7-4-5-13-11(7)12(10)15-9-6-8(9)14-15/h1-6,13H                                        |
| <b>s12-23</b>  |  | 11.386  | 135.1393 | -7.4922  | 95.171   | 265.8802 | InChI=1S/C12H7N3O/c16-12-8-3-1-2-7-4-5-13-9(7)6-10-11(12)15(10)14-8/h1-6,13H/h3-1-,7-2-,9-6+                        |
| <b>x5-33</b>   |  | 13.4776 | 190.8223 | -6.1163  | 46.8948  | 266.0537 | InChI=1S/C12H7N3O/c16-12-8-3-1-2-7-4-5-13-10(7)14-11-9(6-8)15(11)12/h1-6H, (H,13,14)                                |

|               |                                                                                     |          |           |           |           |           |                                                                                                                            |
|---------------|-------------------------------------------------------------------------------------|----------|-----------|-----------|-----------|-----------|----------------------------------------------------------------------------------------------------------------------------|
| <b>F-2</b>    | 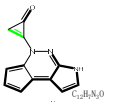   | 38, 8638 | 208, 6444 | -17, 6774 | 21, 4518  | 266, 0698 | InChI=1S/C12H7N3O/c16-11-6-10(11)15-9-3-1-2-7(9)8-4-5-13-12(8)14-15/h1-6H, (H, 13, 14)                                     |
| <b>x7-42</b>  |    | 15, 8541 | 180, 0457 | -7, 8204  | 62, 7807  | 266, 1268 | InChI=1S/C12H7N3O/c16-8-3-1-2-7-4-5-13-10(7)9-11-12(9)15(8)6-14-11/h1-6, 13H/h3-1-, 7-2-, 10-9-                            |
| <b>o-91</b>   |    | 3, 5601  | 70, 1685  | -2, 1492  | 181, 7983 | 266, 3691 | InChI=1S/C12H7N3O/c16-12-11-7-6-9-10(3-4-13-9)15(12)5-1-2-8(7)14-11/h1-6, 13H/h5-1-, 8-2-                                  |
| <b>x9-21</b>  |    | 15, 6755 | 176, 8735 | -6, 5579  | 66, 5831  | 266, 4055 | InChI=1S/C12H7N3O/c16-12-9-7(4-5-13-9)2-1-3-8-6-14-11-10(8)15(11)12/h1-6, 13H/h2-1-, 8-3-                                  |
| <b>E-41</b>   |    | 7, 4241  | 50, 4435  | -1, 4671  | 181, 8499 | 266, 4793 | InChI=1S/C12H7N3O/c16-11-6-9-10-3-1-2-8(14-9)7-4-5-13-12(7)15(10)11/h1-6, 13H                                              |
| <b>H-117</b>  |    | 4, 7838  | 41, 1789  | -1, 8213  | 197, 2288 | 266, 4958 | InChI=1S/C12H7N3O/c16-12-10-7-2-1-3-9(14-10)8-4-5-13-11(8)15(12)6-7/h1-6, 13H                                              |
| <b>H-27</b>   |    | 19, 4829 | 137, 0406 | -14, 566  | 104, 8203 | 266, 6294 | InChI=1S/C12H7N3O/c16-12-8-6-7(8)10-11-9(2-4-14-11)15(12)5-1-3-13-10/h1-6, 14H/h5-1-, 13-3-                                |
| <b>E-23</b>   |    | 7, 7035  | 102, 5525 | -1, 8888  | 132, 5002 | 266, 7656 | InChI=1S/C12H7N3O/c16-12-8-6-14-9-2-1-3-10(8)15(12)11-7(9)4-5-13-11/h1-6, 13H/h2-1-, 3-1-, 8-6-, 9-2-, 10-3-, 14-6-, 14-9- |
| <b>j-18</b>   |  | 17, 826  | 194, 6525 | -9, 7922  | 45, 7128  | 266, 8761 | InChI=1S/C12H7N3O/c16-12-10-7-2-1-4-13-8-3-5-14-9(8)6-15(12)11(7)10/h1-6, 14H/h4-1-, 7-2-, 9-6-, 13-8+                     |
| <b>p-1</b>    |  | 6, 4531  | 51, 092   | -5, 6309  | 187, 882  | 266, 9787 | InChI=1S/C12H7N3O/c16-12-10-6-8-7(4-5-13-8)2-1-3-9-11(12)14-15(9)10/h1-6, 13H/h2-1-, 9-3-, 10-6-                           |
| <b>H11-59</b> |  | 4, 9501  | 82, 2704  | -2, 9986  | 163, 4752 | 267, 0869 | InChI=1S/C12H7N3O/c16-11-6-10-7-2-1-3-9(14-15(10)11)12-8(7)4-5-13-12/h1-6, 13H                                             |
| <b>o-85</b>   |  | 7, 0036  | 96, 354   | -0, 2394  | 137, 4813 | 267, 1519 | InChI=1S/C12H7N3O/c16-12-10-7-6-15(5-1-2-8(7)14-10)9-3-4-13-11(9)12/h1-6, 13H                                              |
| <b>o-242</b>  |  | 6, 8631  | 75, 2938  | -2, 8969  | 169, 9071 | 267, 1796 | InChI=1S/C12H7N3O/c16-10-6-8-7-2-1-5-15(10)9-3-4-13-12(9)11(7)14-8/h1-6, 13H/h5-1-, 7-2-, 8-6+                             |
| <b>p1-19</b>  |  | 14, 4831 | 221, 9069 | -11, 2218 | 21, 439   | 267, 2292 | InChI=1S/C12H7N3O/c16-9-3-1-2-7-4-5-13-11(7)10(9)12-8-6-15(8)14-12/h1-6, 13H                                               |
| <b>F-8</b>    |  | 10, 3947 | 163, 1443 | -8, 58    | 83, 6789  | 267, 284  | InChI=1S/C12H7N3O/c16-11-8-3-1-2-7(8)9-4-5-13-12(9)14-15-6-10(11)15/h1-6H, (H, 13, 14)/b9-7-                               |
| <b>n-107</b>  |  | 5, 5884  | 177, 2905 | -4, 7305  | 63, 0496  | 267, 5498 | InChI=1S/C12H7N3O/c16-9-6-14-10-7-2-1-5-15(12(7)10)8-3-4-13-11(8)9/h1-6, 13H/h4-6-                                         |
| <b>G1-91</b>  |  | 11, 8586 | 210, 3654 | -6, 7359  | 40, 2902  | 267, 5749 | InChI=1S/C12H7N3O/c16-10-3-1-2-7(10)8-4-5-13-11(8)12-9-6-14-15(9)12/h1-6, 13H                                              |
| <b>X22-48</b> |  | 13, 8852 | 124, 7053 | -6, 8774  | 116, 1307 | 267, 8009 | InChI=1S/C12H7N3O/c16-11-8-6-15-10(11)7(8)2-1-4-13-9-3-5-14-12(9)15/h1-6, 14H/h2-1-, 13-4-                                 |
| <b>n-208</b>  |  | 7, 2749  | 46, 2621  | -1, 9566  | 180, 8363 | 267, 9216 | InChI=1S/C12H7N3O/c16-12-7-2-1-5-15-8-3-4-13-11(8)10(7)9(15)6-14-12/h1-6, 13H                                              |



|                |                                                                                     |         |          |          |          |          |                                                                                                              |
|----------------|-------------------------------------------------------------------------------------|---------|----------|----------|----------|----------|--------------------------------------------------------------------------------------------------------------|
| <b>p-5</b>     | 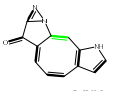   | 18.3766 | 166.4133 | -4.1907  | 70.7777  | 267.9266 | InChI=1S/C12H7N3O/c16-11-8-3-1-2-7-4-5-13-9(7)6-10(8)15-12(11)14-15/h1-6,13H/t2-1-,3-1-,7-2-,8-3-,9-6+,10-6+ |
| <b>r-59</b>    |    | 32.0088 | 125.3754 | -14.2495 | 111.3093 | 267.9708 | InChI=1S/C12H7N3O/c16-12-14-11-7(4-5-13-11)2-1-3-8-9-6-10(8)15(9)12/h1-6H,(H,13,14,16)/b3-1-,7-2-            |
| <b>p-2</b>     |    | 18.3715 | 166.554  | -4.2002  | 70.8092  | 268.0247 | InChI=1S/C12H7N3O/c16-11-8-6-9-7(4-5-13-9)2-1-3-10(8)15-12(11)14-15/h1-6,13H/t2-1-,3-1-,7-2-,8-6+,9-6+,10-3+ |
| <b>F-67</b>    |    | 20.9385 | 234.1669 | -16.9853 | 19.2653  | 268.0811 | InChI=1S/C12H7N3O/c16-12-8(7-4-5-13-11(7)14-12)2-1-3-9-10-6-15(9)10/h1-6H,(H,13,14,16)/b2-1-,9-3-            |
| <b>s11-21</b>  |    | 5.1918  | 36.7051  | -3.9748  | 196.3846 | 268.2974 | InChI=1S/C12H7N3O/c16-12-8-6-15-9(14-8)3-1-2-7-4-5-13-10(7)11(12)15/h1-6,13H/b3-1-,7-2-,11-10+               |
| <b>E-48</b>    |    | 21.1506 | 237.2349 | -16.7622 | 15.7369  | 268.3125 | InChI=1S/C12H7N3O/c16-12-11-7(4-5-13-11)8(14-12)2-1-3-9-10-6-15(9)10/h1-6,13H/b2-1-,9-3-                     |
| <b>B-31</b>    |    | 3.0771  | 84.2254  | -1.7887  | 160.4054 | 268.3231 | InChI=1S/C12H7N3O/c16-10-6-9-11(10)14-8-2-1-5-15(9)12-7(8)3-4-13-12/h1-6,13H                                 |
| <b>H11-140</b> |    | 13.7916 | 193.1917 | -11.4221 | 45.3476  | 268.3574 | InChI=1S/C12H7N3O/c16-12-10-6-15(10)14-9-3-1-2-7(9)8-4-5-13-11(8)12/h1-6,13H/b14-9+                          |
| <b>H1-88</b>   |   | 23.7434 | 147.8239 | -9.4002  | 100.1206 | 268.3744 | InChI=1S/C12H7N3O/c16-10-3-1-2-7(10)8-4-5-13-11(8)9-6-15-12(9)14-15/h1-6,13H                                 |
| <b>E-63</b>    |  | 5.1     | 88.8566  | -2.7873  | 157.876  | 268.6071 | InChI=1S/C12H7N3O/c16-12-8-2-1-3-9-7-4-5-13-11(7)15(12)10(8)6-14-9/h1-6,13H/t2-1-,3-1-,8-2-,9-3-             |
| <b>E-37</b>    |  | 5.7431  | 44.5414  | -1.5221  | 193.104  | 268.6402 | InChI=1S/C12H7N3O/c16-10-6-11-14-8-2-1-3-9(10)15(11)12-7(8)4-5-13-12/h1-6,13H/b2-1-,9-3-                     |
| <b>H11-45</b>  |  | 5.4958  | 118.9425 | -0.635   | 121.2882 | 268.8245 | InChI=1S/C12H7N3O/c16-12-9-6-8-7(4-5-13-8)10-2-1-3-11(14-9)15(10)12/h1-6,13H                                 |
| <b>I-100</b>   |  | 12.751  | 155.6641 | -8.5346  | 81.9144  | 268.8941 | InChI=1S/C12H7N3O/c16-12-10-7-6-8-9(2-4-13-8)15(11(7)10)5-1-3-14-12/h1-6,13H/b5-1-,14-3-                     |
| <b>X-25</b>    |  | 8.4729  | 139.0849 | -2.1481  | 110.2644 | 269.1313 | InChI=1S/C12H7N3O/c16-12-10-9-6-7(2-1-4-13-10)8-3-5-14-11(8)15(9)12/h1-6,14H/t2-1-,4-1-,7-2-,13-4+,13-10-    |
| <b>o-87</b>    |  | 8.8396  | 135.8842 | -3.1814  | 102.6043 | 269.1346 | InChI=1S/C12H7N3O/c16-12-11-7-2-1-5-15(12)10-3-4-13-9(10)6-8(7)14-11/h1-6,13H/b8-6+                          |
| <b>H-87</b>    |  | 13.3643 | 195.2826 | -8.9015  | 43.2838  | 269.3    | InChI=1S/C12H7N3O/c16-12-10-9(4-5-13-10)8-3-1-2-7-6-15(7)14-11(8)12/h1-6,13H/t2-1-,8-3-,14-11+               |
| <b>q1-56</b>   |  | 15.5807 | 230.9341 | -12.1394 | 16.9766  | 269.3425 | InChI=1S/C12H7N3O/c16-11-8(12-14-9-6-15(9)12)3-1-2-7-4-5-13-10(7)11/h1-6,13H                                 |
| <b>q11-16</b>  |  | 13.7263 | 218.4223 | -4.9944  | 30.089   | 269.3626 | InChI=1S/C12H7N3O/c16-12-9-6-8-3-1-2-7-4-5-13-10(7)11(8)14-15(9)12/h1-6,13H                                  |
| <b>H1-127</b>  |  | 23.7944 | 144.494  | -9.8049  | 104.8398 | 269.4558 | InChI=1S/C12H7N3O/c16-10-3-1-2-7(10)8-4-5-13-12(8)9-6-11-14-15(9)11/h1-6,13H                                 |

|                                                                                     |                                                                                     |         |          |          |          |          |                                                                                                |
|-------------------------------------------------------------------------------------|-------------------------------------------------------------------------------------|---------|----------|----------|----------|----------|------------------------------------------------------------------------------------------------|
|    |    | 23.9013 | 141.2334 | -9.583   | 97.9737  | 269.5304 | InChI=1S/C12H7N3O/c16-12-8(9-6-10-14-15(9)10)3-1-2-7-4-5-13-11(7)12/h1-6,13H                   |
| <b>q1-38</b>                                                                        | <chem>C12H7N3O</chem>                                                               |         |          |          |          |          |                                                                                                |
|    |    | 16.2511 | 211.6004 | -10.1616 | 50.9467  | 269.7676 | InChI=1S/C12H7N3O/c16-12-10-6-9(15(10)12)8-3-1-2-7-4-5-13-11(7)14-8/h1-6H, 1H,13,14)/b9-8-     |
| <b>r-23</b>                                                                         | <chem>C12H7N3O</chem>                                                               |         |          |          |          |          |                                                                                                |
|    |    | 6.3657  | 92.5972  | -1.4865  | 143.5781 | 269.9233 | InChI=1S/C12H7N3O/c16-12-7-6-8-10(7)11-9(2-4-14-11)15(12)5-1-3-13-8/h1-6,14H/b5-1-,13-3-       |
| <b>h1-32</b>                                                                        | <chem>C12H7N3O</chem>                                                               |         |          |          |          |          |                                                                                                |
|    |    | 10.4798 | 123.2725 | -1.52    | 106.0255 | 269.9784 | InChI=1S/C12H7N3O/c16-12-7-6-9-10(7)11-8(2-4-13-11)15(9)5-1-3-14-12/h1-6,13H/b5-1-,13-3-       |
| <b>l-103</b>                                                                        | <chem>C12H7N3O</chem>                                                               |         |          |          |          |          |                                                                                                |
|    |    | 18.3526 | 163.195  | -7.9358  | 67.5321  | 270.0092 | InChI=1S/C12H7N3O/c16-9-6-7-2-1-4-13-8-3-5-14-10(8)12-11(7)15(9)12/h1-6,14H/b2-1-,13-4+        |
| <b>x23-26</b>                                                                       | <chem>C12H7N3O</chem>                                                               |         |          |          |          |          |                                                                                                |
|    |    | 15.3136 | 176.3069 | -10.2613 | 69.2743  | 270.2289 | InChI=1S/C12H7N3O/c16-10-6-9-11-7(3-5-14-11)13-4-1-2-8-12(10)15(8)9/h1-6,14H/b2-1-,13-4-       |
| <b>x22-42</b>                                                                       | <chem>C12H7N3O</chem>                                                               |         |          |          |          |          |                                                                                                |
|    |    | 23.9818 | 142.1045 | -9.3106  | 99.5616  | 270.2334 | InChI=1S/C12H7N3O/c16-9-3-1-2-7-4-5-13-11(7)10(9)8-6-15-12(8)14-15/h1-6,13H                    |
| <b>p1-35</b>                                                                        | <chem>C12H7N3O</chem>                                                               |         |          |          |          |          |                                                                                                |
|    |    | 16.074  | 230.9498 | -12.1172 | 18.1087  | 270.2944 | InChI=1S/C12H7N3O/c16-8-3-1-2-7-4-5-13-11(7)10(8)12-14-9-6-15(9)12/h1-6,13H                    |
| <b>p1-54</b>                                                                        | <chem>C12H7N3O</chem>                                                               |         |          |          |          |          |                                                                                                |
|  |  | 15.9428 | 194.0952 | -9.6289  | 39.08    | 270.3136 | InChI=1S/C12H7N3O/c16-12-8-6-7(8)2-1-5-15-9-3-4-13-10(9)11(15)14-12/h1-6,13H/b5-1-,7-2-,14-11- |
| <b>o-223</b>                                                                        | <chem>C12H7N3O</chem>                                                               |         |          |          |          |          |                                                                                                |
|  |  | 42.5397 | 222.7128 | -19.5289 | 10.2338  | 270.3293 | InChI=1S/C12H7N3O/c16-10-6-9(10)15-12-8(14-15)3-1-2-7-4-5-13-11(7)12/h1-6,13H                  |
| <b>s11-23</b>                                                                       | <chem>C12H7N3O</chem>                                                               |         |          |          |          |          |                                                                                                |
|  |  | 41.3849 | 223.0005 | -19.4366 | 9.1582   | 270.3331 | InChI=1S/C12H7N3O/c16-10-6-9(10)15-8-3-1-2-7-4-5-13-11(7)12(8)14-15/h1-6,13H                   |
| <b>q11-1</b>                                                                        | <chem>C12H7N3O</chem>                                                               |         |          |          |          |          |                                                                                                |
|  |  | 14.0218 | 189.1175 | -7.0613  | 63.1346  | 270.3507 | InChI=1S/C12H7N3O/c16-12-10-7-6-15(12)5-1-3-13-8-2-4-14-11(8)9(7)10/h1-6,14H/b3-1-,13-3+       |
| <b>k-25</b>                                                                         | <chem>C12H7N3O</chem>                                                               |         |          |          |          |          |                                                                                                |
|  |  | 6.8208  | 167.1528 | -2.8989  | 92.9133  | 270.4957 | InChI=1S/C12H7N3O/c16-10-3-1-2-7-8-4-5-13-12(8)15(10)9-6-14-11(7)9/h1-6,13H/b3-1-,7-2+         |
| <b>G1-67</b>                                                                        | <chem>C12H7N3O</chem>                                                               |         |          |          |          |          |                                                                                                |
|  |  | 4.1291  | 82.8702  | -2.2261  | 167.5477 | 270.5926 | InChI=1S/C12H7N3O/c16-12-8-2-1-3-9-7-4-5-13-10(7)6-11(8)15(12)14-9/h1-6,13H/b3-1-,8-2+         |
| <b>E-62</b>                                                                         | <chem>C12H7N3O</chem>                                                               |         |          |          |          |          |                                                                                                |
|  |  | 12.2136 | 226.2923 | -6.2463  | 28.6998  | 270.6062 | InChI=1S/C12H7N3O/c16-12-11-8-6-10-7(4-5-13-10)2-1-3-9(8)14-15(11)12/h1-6,13H/b3-1-,7-2-,10-6+ |
| <b>s12-36</b>                                                                       | <chem>C12H7N3O</chem>                                                               |         |          |          |          |          |                                                                                                |
|  |  | 16.2637 | 211.7792 | -9.9640  | 49.3043  | 270.6401 | InChI=1S/C12H7N3O/c16-12-10-6-9(15(10)12)7-2-1-4-13-11-8(7)3-5-14-11/h1-6,14H/b9-7-            |
| <b>C-25</b>                                                                         | <chem>C12H7N3O</chem>                                                               |         |          |          |          |          |                                                                                                |
|  |  | 17.5367 | 223.2863 | -14.3443 | 23.8666  | 270.6582 | InChI=1S/C12H7N3O/c16-12-10-7(4-5-13-10)2-1-3-8-11(14-12)9-6-15(8)9/h1-6,13H/b2-1-,8-3+,14-11+ |
| <b>q1-12</b>                                                                        | <chem>C12H7N3O</chem>                                                               |         |          |          |          |          |                                                                                                |
|  |  | 7.6194  | 45.6854  | -1.7747  | 184.6738 | 270.6881 | InChI=1S/C12H7N3O/c16-12-8-2-1-5-15-6-14-10(12)11(15)9-7(8)3-4-13-9/h1-6,13H/b5-1?,8-2-        |
| <b>A-208</b>                                                                        | <chem>C12H7N3O</chem>                                                               |         |          |          |          |          |                                                                                                |
|  |  | 23.5662 | 141.5112 | -9.2103  | 99.4094  | 270.6925 | InChI=1S/C12H7N3O/c16-9-3-1-2-7-4-5-13-12(7)11(9)8-6-10-14-15(8)10/h1-6,13H                    |
| <b>p1-9</b>                                                                         | <chem>C12H7N3O</chem>                                                               |         |          |          |          |          |                                                                                                |

|               |                                                                                     |         |          |          |          |          |                                                                                                              |
|---------------|-------------------------------------------------------------------------------------|---------|----------|----------|----------|----------|--------------------------------------------------------------------------------------------------------------|
| <b>x2-13</b>  |    | 39,3498 | 168,5154 | -17,2945 | 58,8043  | 270,6955 | InChI=1S/C12H7N3O/c16-12-7-6-9-8(2-4-14-9)13-3-1-5-15-10(7)11(12)15/h1-6,14H/b5-1-,7-6-,13-3+                |
| <b>i-3</b>    |    | 4,8713  | 96,4335  | -4,2493  | 160,1313 | 270,9458 | InChI=1S/C12H7N3O/c16-12-9-6-7-2-1-4-13-8-3-5-14-10(8)11(12)15(7)9/h1-6,14H/b4-1-,7-2-,11-10-,13-8+          |
| <b>G1-88</b>  |    | 8,0354  | 169,9014 | -4,4073  | 75,8332  | 271,0592 | InChI=1S/C12H7N3O/c16-7-2-1-3-9-8-4-5-13-10(8)12-11(9)15(12)14-6-7/h1-6,13H/b2-1-,9-3-,14-6-                 |
| <b>H1-6</b>   |    | 11,2898 | 198,8486 | -8,1654  | 44,0154  | 271,099  | InChI=1S/C12H7N3O/c16-9-2-1-4-13-8-3-5-14-10(8)7-6-15-11(7)12(9)15/h1-6,14H/b2-1-,13-4+                      |
| <b>I-79</b>   |    | 14,1355 | 135,5532 | -8,2835  | 97,688   | 271,1617 | InChI=1S/C12H7N3O/c16-9-6-7-10-11-8(2-4-14-11)15(12(7)10)5-1-3-13-9/h1-6,14H/b5-1-,7-6-,13-3-                |
| <b>H11-42</b> |    | 9,8659  | 155,4035 | -2,2372  | 68,4777  | 271,4306 | InChI=1S/C12H7N3O/c16-12-8-6-15(12)10-3-1-2-9(14-10)7-4-5-13-11(7)8/h1-6,13H                                 |
| <b>x5-36</b>  |    | 4,2497  | 126,3441 | -3,3479  | 134,3575 | 271,4568 | InChI=1S/C12H7N3O/c16-12-10-9-6-8(15(9)12)3-1-2-7-4-5-13-11(7)14-10/h1-6H, (H,13,14)                         |
| <b>H-151</b>  |    | 5,1668  | 83,207   | -3,0573  | 169,3248 | 271,7613 | InChI=1S/C12H7N3O/c16-12-14-11-9-3-1-2-7(6-15(11)12)10-8(9)4-5-13-10/h1-6,13H                                |
| <b>H11-84</b> |    | 5,277   | 69,3427  | -2,6884  | 178,0846 | 271,7748 | InChI=1S/C12H7N3O/c16-12-8-2-1-3-9-11(15(12)14-9)6-10-7(8)4-5-13-10/h1-6,13H/b3-1-,8-2-                      |
| <b>C-35</b>   |   | 9,1177  | 126,0855 | -2,0546  | 115,1748 | 271,9517 | InChI=1S/C12H7N3O/c16-10-6-9-11(10)7-2-1-4-14-15(9)12-8(7)3-5-13-12/h1-6,13H/b2-1-,14-4-                     |
| <b>q1-7</b>   |  | 5,9748  | 145,3667 | -2,5233  | 106,2465 | 271,9987 | InChI=1S/C12H7N3O/c16-12-11-7(4-5-13-11)2-1-3-8-6-9-10(8)14-15(9)12/h1-6,13H/b2-1-,8-3-                      |
| <b>H11-21</b> |  | 6,5446  | 124,1839 | -0,6853  | 117,8515 | 272,0377 | InChI=1S/C12H7N3O/c16-12-8-2-1-3-10-7-4-5-13-9(7)6-11(14-8)15(10)12/h1-6,13H                                 |
| <b>o-221</b>  |  | 3,5493  | 89,1536  | -2,2485  | 156,1442 | 272,0458 | InChI=1S/C12H7N3O/c16-12-8-6-7-2-1-5-15(11(8)14-12)9-3-4-13-10(7)9/h1-6,13H                                  |
| <b>x5-44</b>  |  | 8,4426  | 137,4746 | -4,848   | 119,036  | 272,0946 | InChI=1S/C12H7N3O/c16-12-9-8-3-1-2-7-4-5-13-10(7)14-11(9)15(12)6-8/h1-6H, (H,13,14)/b3-1-,7-2-               |
| <b>p1-29</b>  |  | 30,4155 | 162,9516 | -19,9368 | 71,048   | 272,1779 | InChI=1S/C12H7N3O/c16-10-3-1-2-7-4-5-13-11(7)8(10)6-9-12-14-15(9)12/h1-6,13H/b9-6-                           |
| <b>H11-32</b> |  | 15,7146 | 197,7946 | -5,4254  | 39,1802  | 272,2209 | InChI=1S/C12H7N3O/c16-12-9-6-15(12)14-10-3-1-2-7(10)8-4-5-13-11(8)9/h1-6,13H/b14-10-                         |
| <b>A-45</b>   |  | 8,8134  | 51,1013  | -1,6087  | 181,0185 | 272,306  | InChI=1S/C12H7N3O/c16-12-8-2-1-5-15-11(9(12)6-14-15)10-7(8)3-4-13-10/h1-6,13H/b5-1?,8-2-                     |
| <b>q1-26</b>  |  | 30,2024 | 162,9467 | -19,9862 | 69,851   | 272,3173 | InChI=1S/C12H7N3O/c16-11-8(6-9-12-14-15(9)12)3-1-2-7-4-5-13-10(7)11/h1-6,13H/b9-6+                           |
| <b>A1-28</b>  |  | 6,6847  | 164,3812 | -4,5534  | 88,6674  | 272,9472 | InChI=1S/C12H7N3O/c16-12-8-6-13-4-1-2-9-7-3-5-14-10(7)11(8)15(9)12/h1-6,14H/b2-1-,4-1-,8-6-,9-2-,13-4-,13-6- |

|               |                                                                                     |         |          |          |          |          |                                                                                                           |
|---------------|-------------------------------------------------------------------------------------|---------|----------|----------|----------|----------|-----------------------------------------------------------------------------------------------------------|
| <b>o-173</b>  |    | 6.8653  | 48.2711  | -1.7671  | 185.6399 | 272.9663 | InChI=1S/C12H7N3O/c16-12-7-2-1-5-15-9-3-4-13-10(9)8(6-7)11(15)14-12/h1-6,13H/b5-1-,7-2-                   |
|               | $C_{12}H_7N_3O$                                                                     |         |          |          |          |          |                                                                                                           |
| <b>B-12</b>   |    | 38.8658 | 210.4918 | -17.5920 | 26.6353  | 273.0177 | InChI=1S/C12H7N3O/c16-10-6-9(10)15-5-1-2-8-7-3-4-13-11(7)14-12(8)15/h1-6,13H                              |
|               | $C_{12}H_7N_3O$                                                                     |         |          |          |          |          |                                                                                                           |
| <b>o-6</b>    |    | 6.569   | 97.3444  | -0.4426  | 146.2064 | 273.058  | InChI=1S/C12H7N3O/c16-11-7-2-1-5-15-6-8(7)10(11)14-12-9(15)3-4-13-12/h1-6,13H                             |
|               | $C_{12}H_7N_3O$                                                                     |         |          |          |          |          |                                                                                                           |
| <b>B-230</b>  |    | 12.6115 | 180.9988 | -9.5379  | 62.0081  | 273.1227 | InChI=1S/C12H7N3O/c16-11-9-6-15(9)5-1-2-7-8-3-4-13-12(8)14-10(7)11/h1-6,13H/b5-1-,7-2-                    |
|               | $C_{12}H_7N_3O$                                                                     |         |          |          |          |          |                                                                                                           |
| <b>q1-31</b>  |    | 17.1212 | 217.3519 | -15.2517 | 30.3928  | 273.338  | InChI=1S/C12H7N3O/c16-11-8(14-12-9-6-15(9)12)3-1-2-7-4-5-13-10(7)11/h1-6,13H/b14-12-                      |
|               | $C_{12}H_7N_3O$                                                                     |         |          |          |          |          |                                                                                                           |
| <b>n-8</b>    |    | 14.9452 | 183.1758 | -7.3706  | 52.1885  | 273.3404 | InChI=1S/C12H7N3O/c16-9-6-14-12-8(3-4-13-12)15-5-1-2-7-10(9)11(7)15/h1-6,13H/b14-6+                       |
|               | $C_{12}H_7N_3O$                                                                     |         |          |          |          |          |                                                                                                           |
| <b>F-59</b>   |    | 40.1116 | 198.9502 | -21.1729 | 23.627   | 273.491  | InChI=1S/C12H7N3O/c16-12-9-3-1-2-7(9)8-4-5-13-11(8)14-10-6-15(10)12/h1-6H,13,14/b8-7-                     |
|               | $C_{12}H_7N_3O$                                                                     |         |          |          |          |          |                                                                                                           |
| <b>q11-59</b> |    | 20.2107 | 184.408  | -10.8242 | 55.7734  | 273.5907 | InChI=1S/C12H7N3O/c16-12-8-3-1-2-7-4-5-13-10(7)11(8)14-9-6-15(9)12/h1-6,13H                               |
|               | $C_{12}H_7N_3O$                                                                     |         |          |          |          |          |                                                                                                           |
| <b>H-54</b>   |    | 6.8255  | 125.5488 | -0.6988  | 114.7904 | 274.1684 | InChI=1S/C12H7N3O/c16-10-6-7-2-1-3-8-9-4-5-13-11(9)15(10)12(8)14-7/h1-6,13H                               |
|               | $C_{12}H_7N_3O$                                                                     |         |          |          |          |          |                                                                                                           |
| <b>x4-6</b>   |   | 16.2471 | 209.2332 | -5.3887  | 28.3282  | 274.3784 | InChI=1S/C12H7N3O/c16-9-6-14-12-11-10-7(4-5-13-10)2-1-3-8(9)15(11)12/h1-6,13H/b2-1-,8-3-                  |
|               | $C_{12}H_7N_3O$                                                                     |         |          |          |          |          |                                                                                                           |
| <b>X-39</b>   |  | 11.1132 | 151.2987 | -2.9123  | 96.6153  | 274.3875 | InChI=1S/C12H7N3O/c16-12-10-9-6-7(2-1-4-13-10)8-3-5-14-11(8)15(9)12/h1-6,14H/b2-1-,4-1-,7-2-,13-4-,13-10+ |
|               | $C_{12}H_7N_3O$                                                                     |         |          |          |          |          |                                                                                                           |
| <b>H1-39</b>  |  | 7.4904  | 177.622  | -5.6039  | 75.3332  | 274.7072 | InChI=1S/C12H7N3O/c16-12-10-7-6-13-3-1-5-15(12)8-2-4-14-11(8)9(7)10/h1-6,14H/b5-1-,7-6-,13-3-             |
|               | $C_{12}H_7N_3O$                                                                     |         |          |          |          |          |                                                                                                           |
| <b>H-150</b>  |  | 7.3724  | 139.3043 | -2.3279  | 120.6349 | 274.7694 | InChI=1S/C12H7N3O/c16-12-14-10-6-7-2-1-3-9(15(10)12)8-4-5-13-11(7)8/h1-6,13H                              |
|               | $C_{12}H_7N_3O$                                                                     |         |          |          |          |          |                                                                                                           |
| <b>H1-7</b>   |  | 6.6098  | 59.3041  | -3.9741  | 180.9843 | 274.8727 | InChI=1S/C12H7N3O/c16-7-2-1-3-8-9-4-5-13-12(9)15-10(6-7)11(8)14-15/h1-6,13H/b2-1-,4-1-,7-2-,13-4-,10-6+   |
|               | $C_{12}H_7N_3O$                                                                     |         |          |          |          |          |                                                                                                           |
| <b>H1-63</b>  |  | 25.04   | 191.7285 | -15.6019 | 47.2029  | 274.8918 | InChI=1S/C12H7N3O/c16-10-3-1-2-8-7-4-5-13-11(7)12(14-8)9-6-15(9)10/h1-6,13H/b3-1-,8-2-                    |
|               | $C_{12}H_7N_3O$                                                                     |         |          |          |          |          |                                                                                                           |
| <b>H1-78</b>  |  | 12.7327 | 222.6855 | -4.8014  | 14.209   | 275.0531 | InChI=1S/C12H7N3O/c16-10-3-1-2-8-7-4-5-13-11(7)12(14-8)15-6-9(10)15/h1-6,13H/b3-1-,8-2-                   |
|               | $C_{12}H_7N_3O$                                                                     |         |          |          |          |          |                                                                                                           |
| <b>H1-5</b>   |  | 15.7571 | 196.9395 | -9.5163  | 46.4494  | 275.1376 | InChI=1S/C12H7N3O/c16-10-2-1-4-13-7-3-5-14-11(7)8-6-9-12(10)15(8)9/h1-6,14H/b2-1-,13-4+                   |
|               | $C_{12}H_7N_3O$                                                                     |         |          |          |          |          |                                                                                                           |
| <b>q11-26</b> |  | 7.2065  | 141.3603 | -0.1822  | 106.5311 | 275.2076 | InChI=1S/C12H7N3O/c16-12-9-3-1-2-7-4-5-13-11(7)8-6-10(12)15(9)14-8/h1-6,13H/b2-1-,9-3-                    |
|               | $C_{12}H_7N_3O$                                                                     |         |          |          |          |          |                                                                                                           |
| <b>A2-43</b>  |  | 18.2608 | 168.3353 | -13.2196 | 69.5441  | 275.2699 | InChI=1S/C12H7N3O/c16-12-11-7(3-5-14-11)9-2-1-4-13-8-6-10(8)15(9)12/h1-6,14H/b4-1-,9-2-,13-8-             |
|               | $C_{12}H_7N_3O$                                                                     |         |          |          |          |          |                                                                                                           |

|                |                                                                                     |         |          |          |          |          |                                                                                                                    |
|----------------|-------------------------------------------------------------------------------------|---------|----------|----------|----------|----------|--------------------------------------------------------------------------------------------------------------------|
| <b>H11-120</b> |    | 7.9895  | 113.8385 | -1.3477  | 132.1924 | 275.2775 | InChI=1S/C12H7N3O/c16-11-8-2-1-3-9-7-4-5-13-12(7)15(9)10(11)6-14-8/h1-6,13H/b2-1-,9-3-                             |
| <b>B-232</b>   |    | 7.6716  | 48.8210  | -1.5878  | 190.3081 | 275.3252 | InChI=1S/C12H7N3O/c16-12-8-2-1-5-15-6-9(11(12)14-15)10-7(8)3-4-13-10/h1-6,13H/b5-1-,8-2-                           |
| <b>H11-76</b>  |    | 10.0745 | 126.3189 | -2.8752  | 129.7801 | 275.4223 | InChI=1S/C12H7N3O/c16-12-11-8(4-5-13-11)7-2-1-3-9-14-10(6-7)15(9)12/h1-6,13H/b2-1-,3-1-,7-2+,9-3+                  |
| <b>X22-55</b>  |    | 26.2292 | 243.8188 | 0.3743   | 1.53     | 275.5194 | InChI=1S/C12H7N3O/c16-11-7-2-1-4-13-9-3-5-14-12(9)15-6-8(11)10(7)15/h1-6,14H/b2-1-,13-4-                           |
| <b>B-195</b>   |    | 2.9391  | 87.3509  | -1.7340  | 164.1195 | 275.5687 | InChI=1S/C12H7N3O/c16-11-7-2-1-5-15(9-6-14-10(9)11)12-8(7)3-4-13-12/h1-6,13H                                       |
| <b>x4-61</b>   |    | 16.8119 | 208.357  | -5.7384  | 26.788   | 275.6575 | InChI=1S/C12H7N3O/c16-12-8-3-1-2-7-4-5-13-10(7)11-9(6-14-12)15(8)11/h1-6,13H/b2-1-,8-3-                            |
| <b>X22-34</b>  |    | 16.3042 | 172.5104 | -13.7678 | 90.2156  | 275.6871 | InChI=1S/C12H7N3O/c16-12-7-2-1-4-13-9-3-5-14-11(9)15(12)10-6-8(7)10/h1-6,14H/b2-1-,13-4-                           |
| <b>B-239</b>   |    | 6.0569  | 115.5031 | -0.2536  | 130.0077 | 275.7503 | InChI=1S/C12H7N3O/c16-12-10-9-6-15(12)5-1-2-7(9)8-3-4-13-11(8)14-10/h1-6,13H                                       |
| <b>X23-30</b>  |   | 51.6988 | 163.949  | -29.8209 | 70.0776  | 275.802  | InChI=1S/C12H7N3O/c16-12-10-11(12)15(10)7-2-1-4-13-8-3-5-14-9(8)6-7/h1-6,14H/b2-1-,4-1+,7-2+,7-6-,9-6-,13-4+,13-8- |
| <b>I-86</b>    |  | 4.4177  | 54.2127  | -1.5254  | 189.8087 | 275.8522 | InChI=1S/C12H7N3O/c16-12-7-6-9-10(7)13-3-1-5-15(9)8-2-4-14-11(8)12/h1-6,14H                                        |
| <b>o-232</b>   |  | 26.2116 | 197.3671 | -11.8989 | 54.3868  | 276.0241 | InChI=1S/C12H7N3O/c16-12-11-10(3-4-13-11)15(12)5-1-2-7-8-6-9(7)14-8/h1-6,13H/b5-1-                                 |
| <b>x7-18</b>   |  | 17.0302 | 177.5692 | -6.6691  | 72.4619  | 276.0585 | InChI=1S/C12H7N3O/c16-9-3-1-2-7-4-5-13-10(7)11-12-8(6-14-11)15(9)12/h1-6,13H/b3-1-,7-2-,11-10-                     |
| <b>q1-61</b>   |  | 5.0171  | 86.072   | -4.0934  | 169.4279 | 276.1309 | InChI=1S/C12H7N3O/c16-11-10-7(4-5-13-10)2-1-3-8-6-9-14-12(11)15(8)9/h1-6,13H/b2-1-,8-3-                            |
| <b>q11-61</b>  |  | 4.6015  | 58.1414  | -3.3169  | 190.4479 | 276.3832 | InChI=1S/C12H7N3O/c16-12-8-3-1-2-7-4-5-13-10(7)11-14-9(8)6-15(11)12/h1-6,13H/b2-1-,8-3+                            |
| <b>r-45</b>    |  | 21.7479 | 185.3757 | -10.6078 | 64.7796  | 276.3953 | InChI=1S/C12H7N3O/c16-12-10-8-3-1-2-7-4-5-13-11(7)14-6-9(10)15(8)12/h1-6H,13,14                                    |
| <b>H1-44</b>   |  | 11.8119 | 168.5367 | -5.6766  | 77.8494  | 276.8031 | InChI=1S/C12H7N3O/c16-9-6-7-10-11(7)13-3-1-5-15(9)8-2-4-14-12(8)10/h1-6,14H/b5-1-,13-3+                            |
| <b>B-176</b>   |  | 3.0637  | 88.1284  | -1.8602  | 167.7954 | 277.0013 | InChI=1S/C12H7N3O/c16-10-7-2-1-5-15(12-9(10)6-14-12)11-8(7)3-4-13-11/h1-6,13H                                      |
| <b>q11-14</b>  |  | 16.1289 | 212.0865 | -5.4804  | 44.5816  | 277.1225 | InChI=1S/C12H7N3O/c16-12-9-6-14-11-8(15(9)12)3-1-2-7-4-5-13-10(7)11/h1-6,13H                                       |
| <b>s11-1</b>   |  | 16.139  | 211.9739 | -5.4697  | 44.5989  | 277.1847 | InChI=1S/C12H7N3O/c16-12-9-6-14-8-3-1-2-7-4-5-13-10(7)11(8)15(9)12/h1-6,13H                                        |

|               |                                                                                     |         |          |          |          |          |                                                                                                          |
|---------------|-------------------------------------------------------------------------------------|---------|----------|----------|----------|----------|----------------------------------------------------------------------------------------------------------|
| <b>s11-32</b> |    | 7.4786  | 194.4991 | -1.6047  | 61.4967  | 277.3735 | InChI=1S/C12H7N3O/c16-12-10-9-6-8(14-15(9)12)3-1-2-7-4-5-13-11(7)10/h1-6,13H/b3-1-,7-2-,11-10-           |
| <b>x7-48</b>  |    | 13.2181 | 239.0131 | -8.41    | 15.2593  | 277.3751 | InChI=1S/C12H7N3O/c16-8-3-1-2-7-4-5-13-10(7)9(8)11-12-14-6-15(11)12/h1-6,13H                             |
| <b>r-19</b>   |    | 17.6553 | 143.2303 | -9.3937  | 111.7988 | 277.4144 | InChI=1S/C12H7N3O/c16-12-8-6-15(12)9-3-1-2-7-4-5-13-11(7)14-10(8)9/h1-6H,(H,13,14)                       |
| <b>p1-37</b>  |    | 7.2071  | 89.4664  | -5.3907  | 166.3174 | 277.7072 | InChI=1S/C12H7N3O/c16-9-3-1-2-7-4-5-13-10(7)11-8-6-15(9)12(8)14-11/h1-6,13H/b3-1-,7-2-,11-10+            |
| <b>H-109</b>  |    | 5.7459  | 78.967   | -2.7912  | 175.8216 | 277.8076 | InChI=1S/C12H7N3O/c16-12-9-6-7-2-1-3-10(15(12)14-9)8-4-5-13-11(7)8/h1-6,13H/b7-6-                        |
| <b>C-48</b>   |    | 12.0928 | 184.3321 | -8.8533  | 56.4076  | 278.0940 | InChI=1S/C12H7N3O/c16-12-10-7(3-5-14-10)8-2-1-4-13-9-6-15(9)11(8)12/h1-6,14H/b2-1-,13-4-                 |
| <b>q-16</b>   |    | 4.0725  | 54.2207  | -3.0311  | 198.4354 | 278.133  | InChI=1S/C12H7N3O/c16-12-11-8-6-15(12)9(14-11)3-1-2-7-4-5-13-10(7)8/h1-6,13H/b2-1-,9-3-                  |
| <b>k-38</b>   |    | 5.9834  | 82.1597  | -5.3412  | 179.2775 | 278.1828 | InChI=1S/C12H7N3O/c16-12-7-6-15-5-1-3-13-8-2-4-14-10(8)9(12)11(7)15/h1-6,14H/b5-1-,13-3+                 |
| <b>q11-11</b> |    | 4.0203  | 117.3499 | -3.1354  | 139.5078 | 278.3459 | InChI=1S/C12H7N3O/c16-12-9-6-8-3-1-2-7-4-5-13-10(7)11(14-9)15(8)12/h1-6,13H/b2-1-,3-1-,7-2-,8-3-,11-10+  |
| <b>E-24</b>   |   | 6.9557  | 73.431   | -3.75    | 169.2907 | 278.3973 | InChI=1S/C12H7N3O/c16-12-9-6-15(12)14-10-3-1-2-7(9)11-8(10)4-5-13-11/h1-6,13H/b14-10-                    |
| <b>E-4</b>    |  | 7.475   | 74.7653  | -2.0193  | 169.1013 | 278.5342 | InChI=1S/C12H7N3O/c16-12-8-6-15-10(8)3-1-2-9(14-15)7-4-5-13-11(7)12/h1-6,13H                             |
| <b>o-171</b>  |  | 14.0977 | 195.5782 | -8.99    | 45.8534  | 278.6145 | InChI=1S/C12H7N3O/c16-12-10-2-1-5-15(10)9-3-4-13-11(9)7-6-8(7)14-12/h1-6,13H/b14-8-                      |
| <b>s11-55</b> |  | 21.8922 | 206.0038 | -16.5636 | 46.0932  | 278.8171 | InChI=1S/C12H7N3O/c16-12-14-10-3-1-2-7-4-5-13-11(7)8-6-9(8)15(10)12/h1-6,13H/b3-1-,7-2-,11-8+            |
| <b>p1-25</b>  |  | 8.1162  | 61.4223  | -5.4189  | 173.079  | 278.8189 | InChI=1S/C12H7N3O/c16-9-3-1-2-7-4-5-13-10(7)12-8-6-15(12)14-11(8)9/h1-6,13H/b3-1-,7-2-,12-10-            |
| <b>F-33</b>   |  | 21.934  | 223.0169 | -15.085  | 21.5659  | 278.9946 | InChI=1S/C12H7N3O/c16-12-10-6-15(10)9-3-1-2-7(9)8-4-5-13-11(8)14-12/h1-6H,(H,13,14,16)/b8-7-             |
| <b>q-61</b>   |  | 18.463  | 188.2292 | -11.0039 | 55.2189  | 279.568  | InChI=1S/C12H7N3O/c16-12-8-3-1-2-7-4-5-13-10(7)9-6-15(9)11(8)14-12/h1-6,13H/b2-1-,8-3-                   |
| <b>G1-69</b>  |  | 10.2691 | 189.9755 | -7.383   | 65.1971  | 279.5942 | InChI=1S/C12H7N3O/c16-10-3-1-2-7-8-4-5-13-12(8)15-9(6-14-10)11(7)15/h1-6,13H/b3-1-,7-2-,14-6-            |
| <b>s11-61</b> |  | 24.3443 | 166.8828 | -16.6638 | 65.5752  | 279.6296 | InChI=1S/C12H7N3O/c16-12-8-3-1-2-7-4-5-13-11(7)10(12)9-6-15(9)14-8/h1-6,13H/b3-1-,7-2-,11-10+            |
| <b>s11-31</b> |  | 5.307   | 115.589  | -2.8561  | 149.8005 | 279.6963 | InChI=1S/C12H7N3O/c16-12-10-8-6-14-9(15(8)12)3-1-2-7-4-5-13-11(7)10/h1-6,13H/b2-1-,3-1-,7-2-,9-3-,11-10- |

|                |                                                                                     |               |          |          |          |          |                                                                                                                 |
|----------------|-------------------------------------------------------------------------------------|---------------|----------|----------|----------|----------|-----------------------------------------------------------------------------------------------------------------|
| <b>s12-6</b>   |    | 6.347         | 104.381  | -5.1005  | 161.8141 | 279.8449 | InChI=1S/C12H7N3O/c16-12-8-6-9-7(4-5-13-9)2-1-3-10-14-11(8)15(10)12/h1-6,13H/b2-1-,3-1-,7-2-,8-6-,9-6-,10-3+    |
| <b>H1-42</b>   |    | <b>8.1298</b> | 128.0553 | -3.6113  | 107.0311 | 279.8549 | InChI=1S/C12H7N3O/c16-12-8-6-7-10(8)13-3-1-5-15(12)9-2-4-14-11(7)9/h1-6,14H/b5-1-,13-3-                         |
| <b>I-11</b>    |    | 6.5998        | 138.0683 | -5.6709  | 128.6945 | 280.115  | InChI=1S/C12H7N3O/c16-12-8-6-15(12)11-7(8)2-1-4-13-9-3-5-14-10(9)11/h1-6,14H/b2-1-,4-1-,7-2-,11-10-,13-4-,13-9+ |
| <b>F-35</b>    |    | 7.3647        | 41.5509  | -3.1719  | 201.8181 | 280.1486 | InChI=1S/C12H7N3O/c16-11-6-10-7-2-1-3-9(11)15(10)14-12-8(7)4-5-13-12/h1-6H, (H,13,14)                           |
| <b>I-82</b>    |    | 18.975        | 137.0755 | -12.4504 | 99.354   | 280.4558 | InChI=1S/C12H7N3O/c16-12-10-7-6-9(7)15(5-1-3-13-10)8-2-4-14-11(8)12/h1-6,14H/b5-1-,13-3-                        |
| <b>H11-41</b>  |    | 5.112         | 76.1242  | -2.0431  | 181.4048 | 280.7742 | InChI=1S/C12H7N3O/c16-12-9-6-15(12)10-3-1-2-7(9)8-4-5-13-11(8)14-10/h1-6H, (H,13,14)                            |
| <b>H11-158</b> |    | 8.247         | 76.1061  | -2.777   | 171.8843 | 280.7794 | InChI=1S/C12H7N3O/c16-11-6-10-9-3-1-2-7(11)8-4-5-13-12(8)15(10)14-9/h1-6,13H/b3-1-,7-2-                         |
| <b>H-110</b>   |    | 5.564         | 69.4222  | -3.0255  | 185.0469 | 280.8484 | InChI=1S/C12H7N3O/c16-12-11-8-3-1-2-7(6-15(12)14-11)10-9(8)4-5-13-10/h1-6,13H/b7-6-                             |
| <b>A2-7</b>    |   | 5.2075        | 103.292  | -1.869   | 152.6436 | 281.1129 | InChI=1S/C12H7N3O/c16-10-6-9-7-2-1-4-13-12(9)15(10)11-8(7)3-5-14-11/h1-6,14H                                    |
| <b>A2-4</b>    |  | 4.2734        | 92.4946  | -1.9569  | 164.8948 | 281.1491 | InChI=1S/C12H7N3O/c16-12-9-6-15(12)11-10-8(3-5-13-10)7(9)2-1-4-14-11/h1-6,13H/b2-1-,4-1-,7-2-,14-4-,14-11+      |
| <b>A-154</b>   |  | 25.7166       | 218.7105 | -10.2464 | 33.8365  | 281.1715 | InChI=1S/C12H7N3O/c16-12-10-11(12)15-5-1-2-9(15)7-3-4-13-8(7)6-14-10/h1-6,13H/b14-6-                            |
| <b>B-178</b>   |  | 5.5621        | 134.3960 | -2.8733  | 125.8273 | 281.3962 | InChI=1S/C12H7N3O/c16-12-9-6-14-10(9)7-2-1-5-15(12)11-8(7)3-4-13-11/h1-6,13H                                    |
| <b>B-45</b>    |  | 7.0862        | 33.6130  | -2.1727  | 205.4868 | 281.4349 | InChI=1S/C12H7N3O/c16-10-6-9-11-7(3-4-13-11)8-2-1-5-15(9)12(10)14-8/h1-6,13H                                    |
| <b>H11-31</b>  |  | 6.3162        | 68.2397  | -4.0796  | 183.1139 | 281.4543 | InChI=1S/C12H7N3O/c16-12-9-6-15(12)14-10-3-1-2-7(9)8-4-5-13-11(8)10/h1-6,13H/b14-10-                            |
| <b>H11-64</b>  |  | 5.2526        | 125.1335 | -1.9385  | 140.5917 | 281.8557 | InChI=1S/C12H7N3O/c16-11-6-9-7-2-1-3-10(15(9)11)14-12-8(7)4-5-13-12/h1-6H, (H,13,14)                            |
| <b>D-10</b>    |  | 7.4589        | 118.7892 | -2.2445  | 146.3350 | 281.9242 | InChI=1S/C12H7N3O/c16-12-8-6-13-4-1-2-9-7-3-5-14-10(7)11(8)15(9)12/h1-6,14H/b2-1-,4-1-,8-6-,9-2-,13-4-,13-6-    |
| <b>D-9</b>     |  | 6.6261        | 78.6423  | -2.7199  | 173.8510 | 282.0449 | InChI=1S/C12H7N3O/c16-12-8-6-15(12)9-2-1-4-13-11(8)10-7(9)3-5-14-10/h1-6,14H/b2-1-,4-1-,9-2-,13-4-,13-11-       |
| <b>q1-20</b>   |  | 7.1574        | 124.9421 | -4.7741  | 139.6512 | 282.2053 | InChI=1S/C12H7N3O/c16-12-10-7(4-5-13-10)2-1-3-9-8-6-15(12)11(8)14-9/h1-6,13H/b2-1-,9-3+                         |
| <b>p1-42</b>   |  | 18.5858       | 148.1898 | -12.281  | 110.2526 | 282.3388 | InChI=1S/C12H7N3O/c16-9-3-1-2-7-4-5-13-10(7)11(9)15-8-6-14-12(8)15/h1-6,13H                                     |

|                |                                                                                     |         |          |          |          |          |                                                                                                              |
|----------------|-------------------------------------------------------------------------------------|---------|----------|----------|----------|----------|--------------------------------------------------------------------------------------------------------------|
| <b>x4-9</b>    | 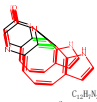   | 19.8651 | 173.9418 | -9.0431  | 72.3495  | 282.4306 | InChI=1S/C12H7N3O/c16-9-6-14-8-3-1-2-7-4-5-13-10(7)12-11(8)15(9)12/h1-6,13H/b2-1-,3-1-,7-2-,8-3+,12-10-      |
| <b>H-43</b>    |    | 9.7589  | 183.1233 | -0.4698  | 62.8536  | 282.4359 | InChI=1S/C12H7N3O/c16-10-6-7-2-1-3-9-8-4-5-13-11(8)15(9)12(10)14-7/h1-6,13H/b2-1-,9-3-                       |
| <b>H1-42</b>   |    | 6.1155  | 147.9819 | -3.1386  | 121.5911 | 282.4394 | InChI=1S/C12H7N3O/c16-10-3-1-2-9-7-4-5-13-12(7)15(9)11-6-8(10)14-11/h1-6,13H/b3-1-,9-2-                      |
| <b>q11-54</b>  |    | 24.1465 | 219.166  | -17.3339 | 33.4006  | 282.5366 | InChI=1S/C12H7N3O/c16-12-11-10-7(4-5-13-10)2-1-3-8-6-9(8)15(12)14-11/h1-6,13H/b2-1-,8-3-                     |
| <b>x4-66</b>   |    | 20.1145 | 175.6835 | -9.2798  | 69.8529  | 282.7059 | InChI=1S/C12H7N3O/c16-12-14-6-8-3-1-2-7-4-5-13-9(7)11-10(8)15(11)12/h1-6,13H/b2-1-,3-1-,7-2-,8-3-,11-9-      |
| <b>F-19</b>    |    | 31.7268 | 222.4865 | -16.9974 | 32.8786  | 282.7382 | InChI=1S/C12H7N3O/c16-12-8-6-15(12)10(8)3-1-2-9-7-4-5-13-11(7)14-9/h1-6H, (H,13,14)/b2-1-,10-3-              |
| <b>s12-41</b>  |    | 18.8176 | 175.5205 | -12.533  | 71.5772  | 282.8291 | InChI=1S/C12H7N3O/c16-12-14-8-3-1-2-7-4-5-13-9(7)6-10-11(8)15(10)12/h1-6,13H/b3-1-,7-2-,9-6-                 |
| <b>r1-37</b>   |    | 31.155  | 161.9261 | -15.8418 | 91.2495  | 283.181  | InChI=1S/C12H7N3O/c16-10-3-1-2-7-4-5-13-12(7)14-8-6-9-11(8)15(9)10/h1-6H, (H,13,14)/b3-1-,7-2-               |
| <b>s11-56</b>  |   | 20.2113 | 138.2119 | -5.6082  | 86.9825  | 283.3825 | InChI=1S/C12H7N3O/c16-12-14-8-3-1-2-7-4-5-13-11(7)10-6-9(8)15(10)12/h1-6,13H/b3-1-,7-2-,11-10-               |
| <b>X22-50</b>  |  | 11.9073 | 182.9028 | -5.2772  | 75.4771  | 283.4417 | InChI=1S/C12H7N3O/c16-12-7-6-15-9(11)(12)15)2-1-4-13-8-3-5-14-10(7)8/h1-6,14H/b2-1-,13-4-                    |
| <b>H-71</b>    |  | 26.1328 | 156.0144 | -16.6645 | 101.6278 | 283.4926 | InChI=1S/C12H7N3O/c16-12-9-3-1-2-7-6-10(7)14-15(12)11-8(9)4-5-13-11/h1-6,13H/b2-1-,9-3-,14-10-               |
| <b>H11-149</b> |  | 6.2858  | 34.7141  | -2.3357  | 215.1499 | 283.607  | InChI=1S/C12H7N3O/c16-11-8-3-1-2-7-6-10(11)15(14-7)12-9(8)4-5-13-12/h1-6,13H/b2-1-,8-3-                      |
| <b>q-5</b>     |  | 19.9815 | 175.3068 | -1.8891  | 71.9789  | 283.6541 | InChI=1S/C12H7N3O/c16-10-6-8-9(15-12(10)14-15)3-1-2-7-4-5-13-11(7)8/h1-6,13H                                 |
| <b>x5-7</b>    |  | 36.2137 | 241.0198 | -17.5869 | 16.5188  | 283.6602 | InChI=1S/C12H7N3O/c16-11-9-6-8-3-1-2-7-4-5-13-12(7)14-15(8)10(9)11/h1-6H, (H,13,14)/b3-1-,7-2-               |
| <b>p-12</b>    |  | 11.3561 | 226.5495 | -5.5322  | 46.7539  | 283.6822 | InChI=1S/C12H7N3O/c16-12-11-14-9-6-8-7(4-5-13-8)2-1-3-10(9)15(11)12/h1-6,13H/b2-1-,3-1-,7-2-,8-6+,9-6+,10-3+ |
| <b>p-11</b>    |  | 11.3579 | 226.5228 | -5.5296  | 46.7439  | 283.6852 | InChI=1S/C12H7N3O/c16-12-11-14-8-3-1-2-7-4-5-13-9(7)6-10(8)15(11)12/h1-6,13H/b2-1-,3-1-,7-2-,8-3+,9-6+,10-6+ |
| <b>o-255</b>   |  | 32.1644 | 161.3824 | -15.8338 | 96.5502  | 283.9396 | InChI=1S/C12H7N3O/c16-12-14-9-6-8(9)7-2-1-5-15(12)10-3-4-13-11(7)10/h1-6,13H/b14-9-                          |
| <b>H-3</b>     |  | 32.1635 | 161.3787 | -15.833  | 96.5467  | 283.9396 | InChI=1S/C12H7N3O/c16-10-2-1-4-13-8-3-5-14-11(8)7-6-9-12(7)15(9)10/h1-6,14H/b2-1-,13-4+                      |
| <b>r-22</b>    |  | 13.8999 | 223.3773 | -6.2927  | 50.4139  | 283.9833 | InChI=1S/C12H7N3O/c16-12-10-6-8-9(15(10)12)3-1-2-7-4-5-13-11(7)14-8/h1-6H, (H,13,14)                         |



|               |                                                                                     |         |          |          |          |          |                                                                                                              |
|---------------|-------------------------------------------------------------------------------------|---------|----------|----------|----------|----------|--------------------------------------------------------------------------------------------------------------|
| <b>q1-30</b>  | 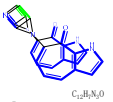   | 18,6139 | 148,5902 | -12,3521 | 109,1813 | 284,0614 | InChI=1S/C12H7N3O/c16-11-8(15-9-6-14-12(9)15)3-1-2-7-4-5-13-10(7)11/h1-6,13H                                 |
| <b>o-71</b>   |    | 5,7086  | 33,498   | -1,789   | 212,1177 | 284,1755 | InChI=1S/C12H7N3O/c16-10-6-8-7-2-1-5-15(14-12(7)10)9-3-4-13-11(8)9/h1-6,13H                                  |
| <b>H-127</b>  |    | 29,3564 | 193,3415 | -11,9977 | 49,7231  | 284,4018 | InChI=1S/C12H7N3O/c16-12-11-10-8(4-5-13-10)9(14-11)3-1-2-7-6-15(7)12/h1-6,13H/b2-1-,9-3-                     |
| <b>H-50</b>   |    | 26,3107 | 171,2122 | -12,454  | 82,3967  | 284,5098 | InChI=1S/C12H7N3O/c16-12-11-8-6-7(8)10-9(2-4-14-10)15(12)5-1-3-13-11/h1-6,14H                                |
| <b>p1-44</b>  |    | 17,0289 | 173,0059 | -11,6986 | 83,094   | 284,6302 | InChI=1S/C12H7N3O/c16-8-3-1-2-7-4-5-13-10(7)12-11(8)14-9-6-15(9)12/h1-6,13H/b3-1-,7-2-,12-10-                |
| <b>s12-35</b> |    | 10,6871 | 182,9374 | -3,5507  | 86,6145  | 284,8534 | InChI=1S/C12H7N3O/c16-12-8-6-9-7(4-5-13-9)2-1-3-10-14-11(8)15(10)12/h1-6,13H/b2-1-,3-1-,7-2-,8-6-,9-6-,10-3+ |
| <b>H-77</b>   |    | 4,5077  | 121,8012 | -1,0678  | 133,9233 | 284,8888 | InChI=1S/C12H7N3O/c16-12-9-3-1-2-7-6-14-11(15(7)12)10-8(9)4-5-13-10/h1-6,13H                                 |
| <b>I-32</b>   |   | 24,9057 | 232,3668 | -8,9476  | 19,8525  | 284,8904 | InChI=1S/C12H7N3O/c16-12-9-8-6-13-3-1-5-15(8)7-2-4-14-11(7)10(9)12/h1-6,14H                                  |
| <b>G-29</b>   |  | 24,1763 | 197,8558 | -10,9561 | 60,9463  | 285,5162 | InChI=1S/C12H7N3O/c16-12-10-3-1-2-8-7-4-5-13-9(7)6-14-11(8)15(10)12/h1-6,13H                                 |
| <b>H-91</b>   |  | 24,6936 | 204,8164 | -6,1077  | 40,7249  | 285,7901 | InChI=1S/C12H7N3O/c16-12-11-9(4-5-13-11)8-3-1-2-7(8)6-10-14-15(10)12/h1-6,13H/b7-6-                          |
| <b>H-68</b>   |  | 7,5599  | 36,4479  | -2,742   | 211,7965 | 285,8006 | InChI=1S/C12H7N3O/c16-10-8-3-1-2-7-6-15(12(10)14-7)11-9(8)4-5-13-11/h1-6,13H/b2-1-,8-3-                      |
| <b>H1-119</b> |  | 19,4506 | 160,2801 | -7,126   | 90,6457  | 285,8536 | InChI=1S/C12H7N3O/c16-11-3-1-2-10-7-4-5-13-8(7)6-9-12(14-9)15(10)11/h1-6,13H                                 |
| <b>D-13</b>   |  | 7,7136  | 148,1636 | -1,6579  | 104,7636 | 286,0760 | InChI=1S/C12H7N3O/c16-12-8-6-15-9(2-1-4-14-12)7-3-5-13-10(7)11(8)15/h1-6,14H/b2-1-,14-4+                     |
| <b>C-68</b>   |  | 21,1280 | 242,3229 | -16,6603 | 16,0694  | 286,1138 | InChI=1S/C12H7N3O/c16-12-10-7(3-5-13-10)8(2-1-4-14-12)11-9-6-15(9)11/h1-6,13H/b2-1-,11-8-,14-4+              |
| <b>H-7</b>    |  | 33,7945 | 117,9504 | -13,625  | 118,2906 | 286,2965 | InChI=1S/C12H7N3O/c16-10-2-1-4-13-7-3-5-14-12(7)11-8-6-9(11)15(8)10/h1-6,14H/b2-1-,13-4+                     |
| <b>k-17</b>   |  | 6,0656  | 51,6611  | -4,8573  | 212,9572 | 286,6337 | InChI=1S/C12H7N3O/c16-12-9-6-7-10-8(2-4-14-10)13-3-1-5-15(9)11(7)12/h1-6,14H/b5-1-,13-3-                     |
| <b>x4-30</b>  |  | 11,2802 | 211,0477 | -5,3628  | 46,4336  | 286,6464 | InChI=1S/C12H7N3O/c16-12-8-3-1-2-7-4-5-13-9(7)10-11(12)15(10)6-14-8/h1-6,13H/b2-1-,8-3+                      |
| <b>I-2</b>    |  | 6,0242  | 48,2635  | -5,1651  | 209,3984 | 286,6912 | InChI=1S/C12H7N3O/c16-12-7-6-15-9(7)2-1-4-13-8-3-5-14-10(8)11(12)15/h1-6,14H/b4-1-,9-2-,11-10-,13-8-         |
| <b>B-22</b>   |  | 5,4204  | 104,2680 | -1,4774  | 157,9607 | 286,9300 | InChI=1S/C12H7N3O/c16-10-6-9-7-2-1-5-15(10)12(9)14-11-8(7)3-4-13-11/h1-6,13H                                 |

|                |                                                                                     |         |          |          |          |          |                                                                                                                     |
|----------------|-------------------------------------------------------------------------------------|---------|----------|----------|----------|----------|---------------------------------------------------------------------------------------------------------------------|
| <b>B-221</b>   | 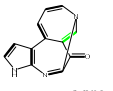   | 6.5173  | 31.6942  | -1.7927  | 212.9590 | 286.9998 | InChI=1S/C12H7N3O/c16-10-9-6-15-5-1-2-7(9)8-3-4-13-11(8)14-12(10)15/h1-6,13H                                        |
|                | $C_{12}H_7N_3O$                                                                     |         |          |          |          |          |                                                                                                                     |
| <b>H11-115</b> |    | 7.6332  | 128.7719 | -1.1949  | 120.0252 | 287.0608 | InChI=1S/C12H7N3O/c16-12-8-2-1-3-10-7-4-5-13-9(7)6-11(12)15(10)14-8/h1-6,13H                                        |
|                | $C_{12}H_7N_3O$                                                                     |         |          |          |          |          |                                                                                                                     |
| <b>J-22</b>    |    | 19.7783 | 191.6137 | -13.2327 | 68.5785  | 287.1839 | InChI=1S/C12H7N3O/c16-12-7-2-1-4-13-8-3-5-14-9(8)6-10-11(7)15(10)12/h1-6,14H/b2-1-,4-1-,7-2-,9-6-,10-6-,13-4-,13-8+ |
|                | $C_{12}H_7N_3O$                                                                     |         |          |          |          |          |                                                                                                                     |
| <b>A-161</b>   |    | 13.2003 | 176.6799 | -5.2391  | 62.1327  | 287.295  | InChI=1S/C12H7N3O/c16-11-8-2-1-5-15-10(11)12(15)14-6-9-7(8)3-4-13-9/h1-6,13H/b14-6-                                 |
|                | $C_{12}H_7N_3O$                                                                     |         |          |          |          |          |                                                                                                                     |
| <b>I-105</b>   |    | 16.8959 | 178.7622 | -12.945  | 73.9829  | 287.5264 | InChI=1S/C12H7N3O/c16-12-10-9(2-4-14-10)15-5-1-3-13-8-6-7(8)11(12)15/h1-6,14H/b5-1-,11-7-,13-3-                     |
|                | $C_{12}H_7N_3O$                                                                     |         |          |          |          |          |                                                                                                                     |
| <b>B-161</b>   |    | 4.6252  | 104.7459 | -1.6566  | 157.4616 | 287.6029 | InChI=1S/C12H7N3O/c16-12-9-6-14-11-8(2-1-5-15(11)12)7-3-4-13-10(7)9/h1-6,13H                                        |
|                | $C_{12}H_7N_3O$                                                                     |         |          |          |          |          |                                                                                                                     |
| <b>A1-37</b>   |    | 8.0578  | 183.4658 | -5.5308  | 68.5642  | 287.8516 | InChI=1S/C12H7N3O/c16-12-8-2-1-4-13-6-15-10(11(12)15)9-7(8)3-5-14-9/h1-6,14H/b4-1-,8-2-,13-6-                       |
|                | $C_{12}H_7N_3O$                                                                     |         |          |          |          |          |                                                                                                                     |
| <b>H11-88</b>  |    | 4.6197  | 123.2683 | -1.0363  | 135.6416 | 287.979  | InChI=1S/C12H7N3O/c16-12-8-2-1-3-10-14-6-9(15(10)12)11-7(8)4-5-13-11/h1-6,13H                                       |
|                | $C_{12}H_7N_3O$                                                                     |         |          |          |          |          |                                                                                                                     |
| <b>s11-64</b>  |   | 18.5167 | 147.6865 | -12.5738 | 96.2652  | 288.0306 | InChI=1S/C12H7N3O/c16-12-11-10-7(4-5-13-10)2-1-3-8(14-12)9-6-15(9)11/h1-6,13H/b3-1-,7-2-,11-10-                     |
|                | $C_{12}H_7N_3O$                                                                     |         |          |          |          |          |                                                                                                                     |
| <b>A-110</b>   |  | 13.6224 | 171.2839 | -3.7172  | 76.226   | 288.1044 | InChI=1S/C12H7N3O/c16-12-10-9-6-14-15(12)5-1-2-7(9)8-3-4-13-11(8)10/h1-6,13H/b5-1-,7-2-                             |
|                | $C_{12}H_7N_3O$                                                                     |         |          |          |          |          |                                                                                                                     |
| <b>C-27</b>    |  | 22.5306 | 196.0763 | -9.7045  | 67.1223  | 288.3716 | InChI=1S/C12H7N3O/c16-12-10-6-9-7(3-5-13-9)8-2-1-4-14-11(8)15(10)12/h1-6,13H                                        |
|                | $C_{12}H_7N_3O$                                                                     |         |          |          |          |          |                                                                                                                     |
| <b>x3-15</b>   |  | 7.8575  | 102.2105 | -2.1166  | 146.8784 | 288.5054 | InChI=1S/C12H7N3O/c16-12-7-6-15-5-1-3-13-11(12)9(7)10-8(15)2-4-14-10/h1-6,14H/b5-1-,13-3-                           |
|                | $C_{12}H_7N_3O$                                                                     |         |          |          |          |          |                                                                                                                     |
| <b>n-196</b>   |  | 8.5974  | 198.7193 | -6.8282  | 68.6978  | 288.5113 | InChI=1S/C12H7N3O/c16-12-10-7-2-1-5-15(11(7)10)9-3-4-13-8(9)6-14-12/h1-6,13H/b14-6-                                 |
|                | $C_{12}H_7N_3O$                                                                     |         |          |          |          |          |                                                                                                                     |
| <b>F-49</b>    |  | 10.1085 | 136.7281 | -4.3294  | 119.4384 | 288.7137 | InChI=1S/C12H7N3O/c16-12-9-3-1-2-7-6-10(9)15(12)14-11-8(7)4-5-13-11/h1-6H,13,14                                     |
|                | $C_{12}H_7N_3O$                                                                     |         |          |          |          |          |                                                                                                                     |
| <b>B-210</b>   |  | 9.5604  | 52.6997  | -1.7961  | 194.9800 | 288.7293 | InChI=1S/C12H7N3O/c16-12-8-2-1-5-15-6-9(12)11(14-15)10-7(8)3-4-13-10/h1-6,13H/b5-1-,8-2-                            |
|                | $C_{12}H_7N_3O$                                                                     |         |          |          |          |          |                                                                                                                     |
| <b>B-161</b>   |  | 7.0404  | 158.9899 | -1.9899  | 103.8464 | 288.9494 | InChI=1S/C12H7N3O/c16-12-11-9-6-7(2-1-5-15(12)14-11)8-3-4-13-10(8)9/h1-6,13H/b5-1-,7-2+                             |
|                | $C_{12}H_7N_3O$                                                                     |         |          |          |          |          |                                                                                                                     |
| <b>q-25</b>    |  | 12.3965 | 226.0416 | -4.1159  | 47.6053  | 288.9612 | InChI=1S/C12H7N3O/c16-12-11-14-6-8-9(15(11)12)3-1-2-7-4-5-13-10(7)8/h1-6,13H                                        |
|                | $C_{12}H_7N_3O$                                                                     |         |          |          |          |          |                                                                                                                     |
| <b>H11-71</b>  |  | 5.9359  | 135.2562 | -1.5825  | 138.6355 | 288.9812 | InChI=1S/C12H7N3O/c16-11-6-10-8-2-1-3-9(15(10)11)7-4-5-13-12(7)14-8/h1-6H,13,14                                     |
|                | $C_{12}H_7N_3O$                                                                     |         |          |          |          |          |                                                                                                                     |
| <b>G-47</b>    |  | 7.0575  | 39.1919  | -2.9015  | 209.7581 | 289.1149 | InChI=1S/C12H7N3O/c16-12-9-6-14-15(12)10-3-1-2-7(9)8-4-5-13-11(8)10/h1-6,13H                                        |
|                | $C_{12}H_7N_3O$                                                                     |         |          |          |          |          |                                                                                                                     |

|                |                                                                                     |         |          |          |          |          |                                                                                                                |
|----------------|-------------------------------------------------------------------------------------|---------|----------|----------|----------|----------|----------------------------------------------------------------------------------------------------------------|
| <b>B-229</b>   | 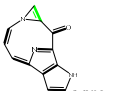   | 17.6381 | 171.6536 | -12.6392 | 86.4873  | 289.1327 | InChI=1S/C12H7N3O/c16-12-9-6-15(9)5-1-2-8-7-3-4-13-10(7)11(12)14-8/h1-6,13H/b5-1-,8-2-                         |
| <b>B-160</b>   |    | 7.7494  | 35.2983  | -2.4813  | 207.1461 | 289.1777 | InChI=1S/C12H7N3O/c16-12-9-6-7-2-1-5-15(9)11(14-12)10-8(7)3-4-13-10/h1-6,13H                                   |
| <b>H11-128</b> |    | 21.8027 | 140.4274 | -11.416  | 107.0879 | 289.2247 | InChI=1S/C12H7N3O/c16-11-7-2-1-3-9(11)14-10-6-15(10)12-8(7)4-5-13-12/h1-6,13H/b14-9-                           |
| <b>r-61</b>    |    | 15.0662 | 261.0521 | -13.0769 | 20.8317  | 289.2957 | InChI=1S/C12H7N3O/c16-12-14-11-7(4-5-13-11)2-1-3-9-8-6-10(8)15(9)12/h1-6H,10,13,14,16/h3-1-,7-2-               |
| <b>p1-58</b>   |    | 6.0689  | 98.6288  | -3.448   | 159.6167 | 289.4837 | InChI=1S/C12H7N3O/c16-9-3-1-2-7-4-5-13-11(7)8-6-10-14-12(9)15(8)10/h1-6,13H/b3-1-,7-2-,11-8+                   |
| <b>X23-18</b>  |    | 12.588  | 150.9674 | -6.6538  | 122.0965 | 289.6586 | InChI=1S/C12H7N3O/c16-12-8-6-7-2-1-4-13-9-3-5-14-10(9)11(8)15(7)12/h1-6,14H/b2-1-,4-1-,7-2-,11-10-,13-4-,13-9- |
| <b>o-247</b>   |    | 5.3963  | 29.0694  | -2.2083  | 218.5866 | 289.7053 | InChI=1S/C12H7N3O/c16-10-6-9-7-2-1-5-15(9)8-3-4-13-12(8)11(7)14-10/h1-6,13H                                    |
| <b>H1-12</b>   |    | 13.6232 | 233.6199 | -3.5258  | 33.2125  | 289.7779 | InChI=1S/C12H7N3O/c16-10-3-1-2-7-8-4-5-13-12(8)14-11(7)9-6-15(9)10/h1-6,13H/b3-1-,7-2-                         |
| <b>H-75</b>    |   | 7.3619  | 99.6933  | -1.7569  | 149.2065 | 289.913  | InChI=1S/C12H7N3O/c16-12-9-3-1-2-7-6-10(14-15(7)12)11-8(9)4-5-13-11/h1-6,13H                                   |
| <b>A2-28</b>   |  | 7.0864  | 79.7175  | -2.6946  | 178.7574 | 290.0521 | InChI=1S/C12H7N3O/c16-12-8-6-15(12)9-2-1-4-13-11(8)10-7(9)3-5-14-10/h1-6,14H/b2-1-,4-1-,9-2-,13-4-,13-11-      |
| <b>H1-8</b>    |  | 5.3078  | 110.2044 | -1.5256  | 154.5449 | 290.3109 | InChI=1S/C12H7N3O/c16-10-3-1-2-7-8-4-5-13-11(8)9-6-15(10)14-12(7)9/h1-6,13H/b3-1-,7-2-                         |
| <b>n-154</b>   |  | 8.1594  | 107.1358 | -2.5207  | 139.1281 | 290.5949 | InChI=1S/C12H7N3O/c16-11-7-2-1-5-15-9-3-4-13-12(9)14-6-8(7)10(11)15/h1-6,13H                                   |
| <b>A1-27</b>   |  | 14.3706 | 228.9544 | -4.5298  | 46.8009  | 290.6989 | InChI=1S/C12H7N3O/c16-12-10-9-6-13-4-1-2-7(9)8-3-5-14-11(8)15(10)12/h1-6,14H                                   |
| <b>H1-137</b>  |  | 28.0223 | 129.3267 | -12.569  | 116.8018 | 290.7083 | InChI=1S/C12H7N3O/c16-9-3-1-2-8(7-4-5-13-12(7)9)15-10-6-11(15)14-10/h1-6,13H                                   |
| <b>B-112</b>   |  | 6.1615  | 85.8902  | -2.8633  | 173.4481 | 290.7209 | InChI=1S/C12H7N3O/c16-12-14-9-6-10-11-8(3-4-13-11)7(9)2-1-5-15(10)12/h1-6,13H/b5-1-,7-2-                       |
| <b>x6-38</b>   |  | 32.714  | 141.7503 | -11.8596 | 89.7757  | 290.8523 | InChI=1S/C12H7N3O/c16-9-3-1-2-7-4-5-13-8(7)6-15-11-10(9)12(15)14-11/h1-6,13H/b3-1-,7-2-,8-6+                   |
| <b>n-148</b>   |  | 10.9952 | 191.2585 | -7.7524  | 66.347   | 290.8549 | InChI=1S/C12H7N3O/c16-12-10-9(3-4-13-10)15-5-1-2-7-8(6-14-12)11(7)15/h1-6,13H/b14-6-                           |
| <b>x5-8</b>    |  | 32.9039 | 213.5949 | -11.9245 | 41.9265  | 290.8942 | InChI=1S/C12H7N3O/c16-11-9-8-3-1-2-7-4-5-13-12(7)14-15(6-8)10(9)11/h1-6H,10,13,14/h3-1-,7-2-                   |
| <b>I-29</b>    |  | 25.5735 | 153.7118 | -13.6396 | 104.3575 | 290.9358 | InChI=1S/C12H7N3O/c16-11-7-6-9(10(7)11)15-5-1-3-13-12-8(15)2-4-14-12/h1-6,14H                                  |

|               |                                                                                     |         |          |          |          |          |                                                                                                      |
|---------------|-------------------------------------------------------------------------------------|---------|----------|----------|----------|----------|------------------------------------------------------------------------------------------------------|
| <b>q-24</b>   | 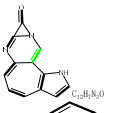   | 10.4092 | 230.6242 | -3.5182  | 46.8936  | 290.9757 | InChI=1S/C12H7N3O/c16-12-11-14-9-3-1-2-7-4-5-13-10(7)8(9)6-15(11)12/h1-6,13H                         |
| <b>B-141</b>  |    | 9.2282  | 78.8221  | -2.9975  | 171.0734 | 291.0696 | InChI=1S/C12H7N3O/c16-12-8-2-1-5-15-10(11)(12)14-15)6-9-7(8)3-4-13-9/h1-6,13H/b5-1-,8-2-             |
| <b>x2-14</b>  |    | 44.4644 | 189.6656 | -18.4986 | 61.9548  | 291.2005 | InChI=1S/C12H7N3O/c16-12-10-9-6-8-7(2-4-14-8)13-3-1-5-15(9)11(10)12/h1-6,14H/b5-1-,9-6-,13-3+        |
| <b>q11-43</b> |    | 4.5044  | 158.3045 | -3.3019  | 117.2972 | 291.3085 | InChI=1S/C12H7N3O/c16-12-14-11-9-6-8(15(9)12)3-1-2-7-4-5-13-10(7)11/h1-6,13H/b2-1-,8-3-              |
| <b>k1-17</b>  |    | 17.9319 | 229.4727 | -21.3013 | 50.107   | 291.3448 | InChI=1S/C12H7N3O/c16-12-10-9(2-4-14-10)13-3-1-5-15(12)11-7-6-8(7)11/h1-6,14H/b5-1-,13-3+            |
| <b>o-141</b>  |    | 3.5206  | 88.0862  | -1.9453  | 174.5027 | 291.3469 | InChI=1S/C12H7N3O/c16-11-7-2-1-5-15(12-8(7)6-14-12)9-3-4-13-10(9)11/h1-6,13H                         |
| <b>E-71</b>   |    | 20.6928 | 187.4377 | -12.484  | 74.5703  | 291.4551 | InChI=1S/C12H7N3O/c16-12-14-9-3-1-2-7-6-10(7)15(12)11-8(9)4-5-13-11/h1-6,13H/b3-1-,7-2-              |
| <b>C-8</b>    |    | 12.3938 | 217.1513 | -7.1334  | 47.6213  | 291.5055 | InChI=1S/C12H7N3O/c16-12-9-6-15(9)14-4-1-2-7-8-3-5-13-11(8)10(7)12/h1-6,13H/b2-1-,14-4-              |
| <b>H-25</b>   |   | 9.9046  | 139.9782 | -6.6209  | 126.5344 | 291.6181 | InChI=1S/C12H7N3O/c16-12-7-2-1-3-9-8-4-5-13-10(8)11(14-9)15(12)6-7/h1-6,13H/b2-1-,9-3-               |
| <b>X-50</b>   |  | 12.2879 | 210.9911 | -4.7381  | 48.8809  | 291.6769 | InChI=1S/C12H7N3O/c16-12-14-4-1-2-7-6-9-11(15(9)12)10-8(7)3-5-13-10/h1-6,13H/b2-1-,14-4-             |
| <b>X22-20</b> |  | 13.7344 | 258.0083 | -12.7329 | 24.775   | 291.9741 | InChI=1S/C12H7N3O/c16-12-11-8(3-5-14-11)13-4-1-2-9-7-6-10(7)15(9)12/h1-6,14H/b2-1-,13-4-             |
| <b>X-45</b>   |  | 6.3093  | 205.6155 | -3.6019  | 61.8586  | 292.2587 | InChI=1S/C12H7N3O/c16-12-10-9-6-7(2-1-4-14-12)8-3-5-13-11(8)15(9)10/h1-6,13H/b2-1-,14-4-             |
| <b>o-80</b>   |  | 3.4822  | 86.4737  | -2.0468  | 177.6747 | 292.6788 | InChI=1S/C12H7N3O/c16-10-6-9-12(10)14-7-2-1-5-15(9)8-3-4-13-11(7)8/h1-6,13H                          |
| <b>H11-6</b>  |  | 7.683   | 268.4263 | -4.4179  | 8.4085   | 292.7019 | InChI=1S/C12H7N3O/c16-12-14-9-3-1-2-7(9)8-4-5-13-11(8)10-6-15(10)12/h1-6,13H/b14-9-                  |
| <b>I-5</b>    |  | 8.7978  | 65.3071  | -5.46    | 186.1112 | 292.7397 | InChI=1S/C12H7N3O/c16-12-7-6-15-9(12)2-1-4-13-8-3-5-14-10(8)11(7)15/h1-6,14H/b4-1-,9-2-,11-10-,13-8- |
| <b>I-69</b>   |  | 3.2079  | 84.4988  | -1.3605  | 180.5918 | 292.7656 | InChI=1S/C12H7N3O/c16-9-6-8-10(9)12-11-7(2-4-14-11)15(8)5-1-3-13-12/h1-6,14H/b5-1-,13-3-             |
| <b>I-21</b>   |  | 8.6576  | 135.6167 | -3.0317  | 122.9783 | 292.8707 | InChI=1S/C12H7N3O/c16-12-7-6-8(12)13-3-1-5-15-9-2-4-14-10(9)11(7)15/h1-6,14H/b5-1-,11-7-,13-3-       |
| <b>x9-28</b>  |  | 21.1302 | 210.026  | -17.2398 | 39.0098  | 292.9666 | InChI=1S/C12H7N3O/c16-12-10-7(4-5-13-10)2-1-3-8-11-9(6-14-12)15(8)11/h1-6,13H/b2-1-,8-3-,14-6-       |
| <b>I-71</b>   |  | 5.6294  | 40.2371  | -2.3325  | 217.4854 | 293.0702 | InChI=1S/C12H7N3O/c16-9-6-8-12-10(9)11-7(2-4-14-11)15(8)5-1-3-13-12/h1-6,14H                         |

|                |                 |          |           |           |           |           |                                                                                                              |
|----------------|-----------------|----------|-----------|-----------|-----------|-----------|--------------------------------------------------------------------------------------------------------------|
| <b>H1-32</b>   |                 | 5, 1603  | 103, 2288 | -2, 081   | 154, 662  | 293, 0743 | InChI=1S/C12H7N3O/c16-10-3-1-2-7-8-4-5-13-12(8)15-6-9(7)11(10)14-15/h1-6, 13H                                |
|                | $C_{12}H_7N_3O$ |          |           |           |           |           |                                                                                                              |
| <b>B-260</b>   |                 | 8, 5683  | 248, 1879 | -4, 7627  | 9, 9399   | 293, 0793 | InChI=1S/C12H7N3O/c16-12-10-8(3-4-13-10)7-2-1-5-15-6-9(15)14-11(7)12/h1-6, 13H/h5-1-, 7-2-, 14-11+           |
|                | $C_{12}H_7N_3O$ |          |           |           |           |           |                                                                                                              |
| <b>s12-21</b>  |                 | 31, 2077 | 201, 4535 | -12, 3343 | 61, 8444  | 293, 1498 | InChI=1S/C12H7N3O/c16-12-10-11(12)15-6-8-7(4-5-13-8)2-1-3-9(15)14-10/h1-6, 13H/h3-1-, 7-2-, 8-6+             |
|                | $C_{12}H_7N_3O$ |          |           |           |           |           |                                                                                                              |
| <b>H-74</b>    |                 | 4, 5634  | 182, 402  | -1, 5605  | 91, 6426  | 293, 5195 | InChI=1S/C12H7N3O/c16-12-9-3-1-2-7-6-14-10(7)15(12)11-8(9)4-5-13-11/h1-6, 13H/h2-1-, 9-3-                    |
|                | $C_{12}H_7N_3O$ |          |           |           |           |           |                                                                                                              |
| <b>B-145</b>   |                 | 5, 7368  | 101, 1529 | -1, 7681  | 166, 8863 | 293, 6345 | InChI=1S/C12H7N3O/c16-12-14-11-8-2-1-5-15(12)10(11)6-9-7(8)3-4-13-9/h1-6, 13H                                |
|                | $C_{12}H_7N_3O$ |          |           |           |           |           |                                                                                                              |
| <b>H11-159</b> |                 | 7, 9901  | 79, 6953  | -2, 4983  | 187, 9395 | 293, 6772 | InChI=1S/C12H7N3O/c16-9-6-11-14-10-3-1-2-7(9)8-4-5-13-12(8)15(10)11/h1-6, 13H/h3-1-, 7-2-                    |
|                | $C_{12}H_7N_3O$ |          |           |           |           |           |                                                                                                              |
| <b>B-93</b>    |                 | 11, 8470 | 251, 6173 | -6, 7214  | 21, 8394  | 293, 7612 | InChI=1S/C12H7N3O/c16-12-14-9-6-8(9)11-7(3-4-13-11)10-2-1-5-15(10)12/h1-6, 13H/h14-9-                        |
|                | $C_{12}H_7N_3O$ |          |           |           |           |           |                                                                                                              |
| <b>X23-34</b>  |                 | 32, 0489 | 216, 5674 | -11, 9538 | 47, 1326  | 293, 7919 | InChI=1S/C12H7N3O/c16-11-9-7-2-1-4-13-8-3-5-14-12(8)15(6-7)10(9)11/h1-6, 14H/h2-1-, 13-4+                    |
|                | $C_{12}H_7N_3O$ |          |           |           |           |           |                                                                                                              |
| <b>s11-30</b>  |                 | 6, 4487  | 54, 9346  | -3, 9252  | 200, 778  | 293, 8397 | InChI=1S/C12H7N3O/c16-12-8-6-15-9(14-12)3-1-2-7-4-5-13-10(7)11(8)15/h1-6, 13H/h3-1-, 7-2-, 11-10+            |
|                | $C_{12}H_7N_3O$ |          |           |           |           |           |                                                                                                              |
| <b>o-121</b>   |                 | 10, 0241 | 58, 1264  | -1, 8532  | 187, 3662 | 294, 0756 | InChI=1S/C12H7N3O/c16-12-7-6-15-5-1-2-8(12)14-10(7)11-9(15)3-4-13-11/h1-6, 13H/h5-1-, 8-2+                   |
|                | $C_{12}H_7N_3O$ |          |           |           |           |           |                                                                                                              |
| <b>x9-40</b>   |                 | 11, 7677 | 234, 6095 | -7, 7937  | 34, 9084  | 294, 0771 | InChI=1S/C12H7N3O/c16-11-8(10-12-14-6-15(10)12)3-1-2-7-4-5-13-9(7)11/h1-6, 13H                               |
|                | $C_{12}H_7N_3O$ |          |           |           |           |           |                                                                                                              |
| <b>H1-34</b>   |                 | 5, 3486  | 36, 9389  | -2, 4445  | 219, 761  | 294, 0818 | InChI=1S/C12H7N3O/c16-10-3-1-2-9-7-4-5-13-11(7)8-6-15(9)14-12(8)10/h1-6, 13H/h2-1-, 3-1-, 7-2-, 9-2-         |
|                | $C_{12}H_7N_3O$ |          |           |           |           |           |                                                                                                              |
| <b>X-5</b>     |                 | 44, 5570 | 257, 0095 | -25, 6236 | 4, 6138   | 294, 1319 | InChI=1S/C12H7N3O/c16-12-10-11(12)15(10)14-4-1-2-7-6-9-8(7)3-5-13-9/h1-6, 13H/h2-1-, 14-4-                   |
|                | $C_{12}H_7N_3O$ |          |           |           |           |           |                                                                                                              |
| <b>s11-44</b>  |                 | 8, 3999  | 158, 6513 | -2, 1565  | 119, 9889 | 294, 2659 | InChI=1S/C12H7N3O/c16-10-6-9-8-3-1-2-7-4-5-13-11(7)12(14-8)15(9)10/h1-6, 13H/h2-1-, 3-1-, 7-2-, 8-3-, 12-11- |
|                | $C_{12}H_7N_3O$ |          |           |           |           |           |                                                                                                              |
| <b>H11-10</b>  |                 | 8, 1236  | 108, 6759 | -1, 3066  | 148, 7546 | 294, 3151 | InChI=1S/C12H7N3O/c16-12-14-7-2-1-3-9-8-4-5-13-11(8)10(6-7)15(9)12/h1-6, 13H/h2-1-, 9-3-                     |
|                | $C_{12}H_7N_3O$ |          |           |           |           |           |                                                                                                              |
| <b>A-4</b>     |                 | 8, 3685  | 102, 7647 | -2, 0791  | 161, 61   | 294, 4907 | InChI=1S/C12H7N3O/c16-9-6-14-12-10(9)7-2-1-5-15(12)11-8(7)3-4-13-11/h1-6, 13H                                |
|                | $C_{12}H_7N_3O$ |          |           |           |           |           |                                                                                                              |
| <b>H11-137</b> |                 | 44, 0623 | 184, 3229 | -25, 3071 | 79, 0991  | 294, 5293 | InChI=1S/C12H7N3O/c16-10-6-8(10)14-11-3-1-2-9-7-4-5-13-12(7)15(9)11/h1-6, 13H/h14-11+                        |
|                | $C_{12}H_7N_3O$ |          |           |           |           |           |                                                                                                              |
| <b>o-185</b>   |                 | 6, 644   | 92, 8431  | -2, 3819  | 160, 0428 | 294, 5434 | InChI=1S/C12H7N3O/c16-11-8-6-7-2-1-5-15(12(8)14-7)9-3-4-13-10(9)11/h1-6, 13H                                 |
|                | $C_{12}H_7N_3O$ |          |           |           |           |           |                                                                                                              |
| <b>o-117</b>   |                 | 5, 372   | 37, 4698  | -1, 98    | 221, 4925 | 294, 6236 | InChI=1S/C12H7N3O/c16-11-7-2-1-5-15-9-3-4-13-10(9)8(11)6-14-12(7)15/h1-6, 13H                                |
|                | $C_{12}H_7N_3O$ |          |           |           |           |           |                                                                                                              |

|               |                                                                                     |          |           |           |           |           |                                                                                                         |
|---------------|-------------------------------------------------------------------------------------|----------|-----------|-----------|-----------|-----------|---------------------------------------------------------------------------------------------------------|
| <b>n-115</b>  |    | 11, 8617 | 189, 9637 | -8, 7527  | 79, 57    | 294, 6408 | InChI=1S/C12H7N3O/c16-9-6-14-12-8(3-4-13-12)15-5-1-2-7-10(9)11(7)15/h1-6, 13H/b14-6-                    |
| <b>B-188</b>  |    | 9, 3533  | 41, 4057  | -1, 9806  | 210, 8432 | 294, 9903 | InChI=1S/C12H7N3O/c16-11-8-2-1-5-15-9(11)6-14-12(15)10-7(8)3-4-13-10/h1-6, 13H                          |
| <b>H1-130</b> |    | 20, 2525 | 207, 9265 | -14, 8336 | 78, 2157  | 294, 994  | InChI=1S/C12H7N3O/c16-11(15-9-6-10(15)14-9)3-1-2-7-8-4-5-13-12(7)8/h1-6, 13H/b3-1-, 7-2-                |
| <b>q11-49</b> |    | 21, 6102 | 144, 0373 | -14, 364  | 106, 7932 | 295, 1502 | InChI=1S/C12H7N3O/c16-12-8-3-1-2-7-4-5-13-10(7)11(14-12)15-6-9(8)15/h1-6, 13H/b2-1-, 8-3-               |
| <b>x7-47</b>  |    | 4, 9976  | 86, 5004  | -4, 5001  | 192, 9228 | 295, 2358 | InChI=1S/C12H7N3O/c16-8-3-1-2-7-4-5-13-10(7)11-9(8)12-14-6-15(11)12/h1-6, 13H/b3-1-, 7-2-, 11-10-       |
| <b>o-29</b>   |    | 14, 6248 | 146, 2098 | -11, 9461 | 122, 7237 | 295, 3225 | InChI=1S/C12H7N3O/c16-11-8-6-14-10(11)7(8)2-1-5-15-9-3-4-13-12(9)15/h1-6, 13H/b5-1-, 7-2+               |
| <b>q1-46</b>  |    | 11, 3913 | 100, 8202 | -6, 7176  | 174, 4028 | 295, 329  | InChI=1S/C12H7N3O/c16-12-10-7(4-5-13-10)2-1-3-8-9-6-15(12)11(8)14-9/h1-6, 13H/b2-1-, 8-3-               |
| <b>G-73</b>   |    | 8, 8233  | 109, 9891 | -2, 3756  | 157, 3214 | 295, 4664 | InChI=1S/C12H7N3O/c16-10-6-14-12-8-2-1-3-9(15(10)12)11-7(8)4-5-13-11/h1-6, 13H                          |
| <b>B-113</b>  |   | 7, 4708  | 110, 5517 | -3, 3727  | 155, 6875 | 295, 5028 | InChI=1S/C12H7N3O/c16-12-10-6-9(14-10)7-2-1-5-15(12)11-8(7)3-4-13-11/h1-6, 13H                          |
| <b>i-19</b>   |  | 19, 8284 | 152, 07   | -13, 223  | 95, 1362  | 295, 5332 | InChI=1S/C12H7N3O/c16-12-8-2-1-4-13-7-3-5-14-11(7)10(12)9-6-15(8)9/h1-6, 14H/b4-1-, 8-2+, 11-10+, 13-7- |
| <b>B-153</b>  |  | 6, 8672  | 111, 3130 | -2, 0928  | 147, 8142 | 295, 5493 | InChI=1S/C12H7N3O/c16-12-9-6-7-2-1-5-15(12)14-11(9)10-8(7)3-4-13-10/h1-6, 13H/b5-1-, 7-2+               |
| <b>o-73</b>   |  | 14, 7205 | 145, 1396 | -11, 8205 | 125, 4861 | 295, 7119 | InChI=1S/C12H7N3O/c16-10-6-8-7(11(10)14-8)2-1-5-15-9-3-4-13-12(9)15/h1-6, 13H/b5-1-, 7-2+               |
| <b>A-163</b>  |  | 31, 9144 | 224, 2051 | -11, 1096 | 25, 9074  | 295, 7537 | InChI=1S/C12H7N3O/c16-12-9-10-7(3-4-13-10)8-2-1-5-15(8)6-14-11(9)12/h1-6, 13H/b14-6-                    |
| <b>G-48</b>   |  | 6, 6862  | 44, 8034  | -2, 7304  | 211, 8609 | 296, 0592 | InChI=1S/C12H7N3O/c16-12-11-7-2-1-3-9(15(12)6-14-11)10-8(7)4-5-13-10/h1-6, 13H                          |
| <b>A-156</b>  |  | 24, 4154 | 200, 2425 | -8, 8865  | 50, 1274  | 296, 1775 | InChI=1S/C12H7N3O/c16-11-8-2-1-5-15-10(11)12(15)14-6-9-7(8)3-4-13-9/h1-6, 13H/b14-6-                    |
| <b>A2-13</b>  |  | 20, 824  | 220, 0057 | -8, 6841  | 58, 4345  | 296, 2445 | InChI=1S/C12H7N3O/c16-12-11-14-4-1-2-8-7-3-5-13-9(7)6-10(8)15(11)12/h1-6, 13H/b4-1-, 8-2-, 14-11-       |
| <b>o-52</b>   |  | 14, 4828 | 144, 5772 | -12, 0062 | 125, 3053 | 296, 3553 | InChI=1S/C12H7N3O/c16-11-7-6-9(11)14-8(7)2-1-5-15-10-3-4-13-12(10)15/h1-6, 13H/b5-1-, 8-2+              |
| <b>X22-14</b> |  | 15, 6579 | 225, 0955 | -14, 8935 | 53, 1926  | 296, 3706 | InChI=1S/C12H7N3O/c16-12-8-6-7(8)10-2-1-4-13-9-3-5-14-11(9)15(10)12/h1-6, 14H/b2-1-, 13-4+              |
| <b>A2-48</b>  |  | 7, 0453  | 103, 9001 | -2, 187   | 147, 9216 | 296, 5383 | InChI=1S/C12H7N3O/c16-11-8-6-15-9(2-1-4-14-12(8)15)7-3-5-13-10(7)11/h1-6, 13H                           |

|                |                                                                                     |         |          |          |          |          |                                                                                                      |
|----------------|-------------------------------------------------------------------------------------|---------|----------|----------|----------|----------|------------------------------------------------------------------------------------------------------|
| <b>H-113</b>   |    | 12.0377 | 127.6125 | -4.5764  | 131.5908 | 296.6551 | InChI=1S/C12H7N3O/c16-12-10-8-3-1-2-7(6-8)9-4-5-13-11(9)15(12)14-10/h1-6,13H                         |
| <b>I-21</b>    |    | 17.2459 | 136.032  | -6.9574  | 135.4018 | 296.6672 | InChI=1S/C12H7N3O/c16-12-10-7-6-15(12)9(7)2-1-4-13-8-3-5-14-11(8)10/h1-6,14H/b4-1-,9-2-,11-10-,13-8+ |
| <b>H11-110</b> |    | 24.8109 | 142.9468 | -15.4294 | 109.1981 | 296.8875 | InChI=1S/C12H7N3O/c16-12-11-7(4-5-13-11)9-3-1-2-8(14-12)10-6-15(9)10/h1-6,13H                        |
| <b>H1-99</b>   |    | 18.486  | 175.116  | -1.9853  | 89.0687  | 297.0752 | InChI=1S/C12H7N3O/c16-7-2-1-3-8-9-4-5-13-11(9)15-12(14-15)10(8)6-7/h1-6,13H                          |
| <b>H11-54</b>  |    | 6.6152  | 75.7646  | -3.6273  | 193.0825 | 297.1153 | InChI=1S/C12H7N3O/c16-12-8-6-15(12)10-3-1-2-9(8)14-11-7(10)4-5-13-11/h1-6H, (H, 13, 14)              |
| <b>H1-64</b>   |    | 6.1788  | 108.2245 | -2.7994  | 153.7978 | 297.1289 | InChI=1S/C12H7N3O/c16-11-3-1-2-7-8-4-5-13-12(8)9-6-10(7)15(11)14-9/h1-6,13H                          |
| <b>C-34</b>    |    | 21.6078 | 203.4406 | -10.1791 | 48.4315  | 297.1846 | InChI=1S/C12H7N3O/c16-12-9-6-15(9)11-8(2-1-4-14-12)7-3-5-13-10(7)11/h1-6,13H/b2-1-,14-4+             |
| <b>A-105</b>   |    | 5.5083  | 162.3974 | -1.7363  | 108.8302 | 297.2877 | InChI=1S/C12H7N3O/c16-12-8-2-1-5-15-9(6-14-15)10(12)11-7(8)3-4-13-11/h1-6,13H/b5-1-,8-2-,10-9-       |
| <b>B-95</b>    |   | 19.5405 | 191.1884 | -14.4006 | 81.6326  | 297.2948 | InChI=1S/C12H7N3O/c16-12-14-10-6-9(10)7-2-1-5-15(12)11-8(7)3-4-13-11/h1-6,13H/b14-10-                |
| <b>o-114</b>   |  | 9.6353  | 39.2994  | -1.9162  | 214.1047 | 297.428  | InChI=1S/C12H7N3O/c16-12-7-2-1-5-15-10-3-4-13-11(10)8(12)6-9(7)14-15/h1-6,13H                        |
| <b>F-53</b>    |  | 6.7207  | 125.6429 | -1.9378  | 135.9501 | 297.434  | InChI=1S/C12H7N3O/c16-12-7-2-1-3-8-9-4-5-13-11(9)14-15(12)10(8)6-7/h1-6H, (H, 13, 14)                |
| <b>H-138</b>   |  | 6.2768  | 44.9232  | -1.9508  | 221.8401 | 297.4528 | InChI=1S/C12H7N3O/c16-12-11-10-8(4-5-13-10)9-3-1-2-7(14-11)6-15(9)12/h1-6,13H                        |
| <b>A1-45</b>   |  | 10.1659 | 229.8211 | -4.8325  | 47.6967  | 297.5411 | InChI=1S/C12H7N3O/c16-11-7-2-1-4-13-6-9-10(11)15(9)12-8(7)3-5-14-12/h1-6,14H/b4-1-,7-2-,13-6-        |
| <b>H11-121</b> |  | 9.0685  | 155.9967 | -2.2475  | 111.702  | 297.5727 | InChI=1S/C12H7N3O/c16-11-8-2-1-3-10-7-4-5-13-12(7)15(10)6-9(11)14-8/h1-6,13H/b2-1-,9-6-,10-3-        |
| <b>B-258</b>   |  | 6.9446  | 99.3367  | -1.8167  | 161.2175 | 297.5977 | InChI=1S/C12H7N3O/c16-12-11-10-8(3-4-13-10)7-2-1-5-15(12)6-9(7)14-11/h1-6,13H                        |
| <b>n-212</b>   |  | 14.4712 | 204.7823 | -5.8267  | 60.1729  | 297.607  | InChI=1S/C12H7N3O/c16-12-14-6-8-7-2-1-5-15(12)9-3-4-13-11(9)10(7)8/h1-6,13H/b5-1-,7-2+,14-6-         |
| <b>B-94</b>    |  | 17.4231 | 186.9124 | -11.2809 | 81.3505  | 297.7857 | InChI=1S/C12H7N3O/c16-12-11-8(3-4-13-11)7-2-1-5-15(12)14-10-6-9(7)10/h1-6,13H/b5-1-,7-2+,14-10-      |
| <b>o-28</b>    |  | 6.0495  | 58.9995  | -3.1459  | 200.0194 | 297.9848 | InChI=1S/C12H7N3O/c16-12-8-6-9-10(3-4-13-9)15-5-1-2-7(8)11(12)14-15/h1-6,13H/b8-6+                   |
| <b>F-48</b>    |  | 9.6974  | 99.1846  | -3.2244  | 160.3447 | 297.9965 | InChI=1S/C12H7N3O/c16-12-9-3-1-2-7-8-4-5-13-11(8)14-15(12)6-10(7)9/h1-6H, (H, 13, 14)                |

|                |                                                                                     |          |           |           |           |           |                                                                                                               |
|----------------|-------------------------------------------------------------------------------------|----------|-----------|-----------|-----------|-----------|---------------------------------------------------------------------------------------------------------------|
| <b>q11-55</b>  | 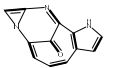   | 12, 9668 | 178, 8999 | -7, 4623  | 77, 3908  | 297, 9996 | InChI=1S/C12H7N3O/c16-12-8-3-1-2-7-4-5-13-10(7)11(12)14-9-6-15(8)9/h1-6, 13H/b2-1-, 8-3+                      |
| <b>F-65</b>    |    | 6, 4299  | 73, 3604  | -3, 8282  | 207, 4953 | 298, 0671 | InChI=1S/C12H7N3O/c16-12-8-2-1-3-10-9(6-15(10)12)14-11-7(8)4-5-13-11/h1-6H, 13H/b5-1-, 7-2+                   |
| <b>o-116</b>   |    | 14, 6332 | 144, 5564 | -11, 9185 | 127, 9342 | 298, 4505 | InChI=1S/C12H7N3O/c16-11-7(8-6-9(11)14-8)2-1-5-15-10-3-4-13-12(10)15/h1-6, 13H/b5-1-, 7-2+                    |
| <b>X22-28</b>  |    | 16, 5132 | 233, 4715 | -9, 9173  | 51, 8886  | 298, 5332 | InChI=1S/C12H7N3O/c16-12-11-7-2-1-4-13-8-3-5-14-9(8)6-10(7)15(11)12/h1-6, 14H/b2-1-, 10-6+, 13-4+             |
| <b>A-85</b>    |    | 2, 4687  | 293, 7689 | -2, 0948  | 5, 3058   | 298, 8915 | InChI=1S/C12H9N3O/c16-12(9-4-3-6-13-9)15-7-2-1-5-11(15)10-8-14-10/h1-8, 13H/b11-10-                           |
| <b>H11-118</b> |    | 11, 7533 | 210, 0306 | -3, 943   | 57, 4536  | 298, 9313 | InChI=1S/C12H7N3O/c16-12-11-9-3-1-2-8(14-9)7-4-5-13-12(7)15-6-10(11)15/h1-6, 13H                              |
| <b>n-163</b>   |    | 5, 9784  | 162, 5785 | -0, 4543  | 107, 9834 | 298, 9669 | InChI=1S/C12H7N3O/c16-12-7-6-14-8(12)2-1-5-15-9-3-4-13-10(9)11(7)15/h1-6, 13H/b5-1-, 8-2+, 11-7-              |
| <b>q1-39</b>   |    | 13, 4721 | 101, 0377 | -6, 867   | 175, 6205 | 299, 0417 | InChI=1S/C12H7N3O/c16-12-11-7(4-5-13-11)2-1-3-8-9-6-10(14-8)15(9)12/h1-6, 13H/b2-1-, 8-3+                     |
| <b>n-52</b>    |    | 32, 3312 | 225, 7906 | -11, 1171 | 25, 967   | 299, 3202 | InChI=1S/C12H7N3O/c16-12-9-10-8(3-4-13-10)15-5-1-2-7(15)6-14-11(9)12/h1-6, 13H/b14-6-                         |
| <b>o-16</b>    |   | 5, 3588  | 39, 2434  | -1, 7954  | 221, 4673 | 299, 4435 | InChI=1S/C12H7N3O/c16-12-7-2-1-5-15-8-3-4-13-10(8)11(12)14-6-9(7)15/h1-6, 13H                                 |
| <b>q11-60</b>  |  | 6, 0429  | 116, 2057 | -3, 3222  | 166, 5322 | 299, 5979 | InChI=1S/C12H7N3O/c16-12-8-3-1-2-7-4-5-13-10(7)11-14-9(6-8)15(11)12/h1-6, 13H/b2-1-, 3-1-, 7-2-, 8-3-, 11-10+ |
| <b>H1-22</b>   |  | 14, 6584 | 229, 1632 | -4, 7219  | 38, 2535  | 299, 6162 | InChI=1S/C12H7N3O/c16-10-3-1-2-8-7-4-5-13-11(7)14-12(8)15-6-9(10)15/h1-6, 13H/b3-1-, 8-2-                     |
| <b>o-7</b>     |  | 3, 3146  | 89, 7637  | -1, 9998  | 181, 1257 | 299, 7106 | InChI=1S/C12H7N3O/c16-12-7-2-1-5-15(9-6-14-11(9)12)8-3-4-13-10(7)8/h1-6, 13H                                  |
| <b>H-126</b>   |  | 22, 7534 | 206, 4993 | -13, 8746 | 63, 7331  | 299, 8536 | InChI=1S/C12H7N3O/c16-12-10-8(3-1-2-7-6-15(7)12)9-4-5-13-11(9)14-10/h1-6, 13H/b2-1-, 8-3-                     |
| <b>x6-32</b>   |  | 27, 7306 | 241, 9086 | -15, 1481 | 23, 528   | 299, 9921 | InChI=1S/C12H7N3O/c16-10-3-1-2-7-4-5-13-8(7)6-9-11-12(14-10)15(9)11/h1-6, 13H/b3-1-, 7-2-, 8-6+, 14-12-       |
| <b>B-209</b>   |  | 7, 6291  | 65, 0075  | -3, 5339  | 200, 4368 | 300, 0352 | InChI=1S/C12H7N3O/c16-11-8-6-15-5-1-2-9(14-12(8)15)7-3-4-13-10(7)11/h1-6, 13H                                 |
| <b>B-124</b>   |  | 7, 2733  | 59, 8454  | -4, 7812  | 211, 4465 | 300, 1014 | InChI=1S/C12H7N3O/c16-12-11-8(3-4-13-11)7-2-1-5-15(12)10-6-9(7)14-10/h1-6, 13H/b5-1-, 7-2-                    |
| <b>B-71</b>    |  | 7, 8685  | 35, 0593  | -2, 7857  | 215, 0652 | 300, 1431 | InChI=1S/C12H7N3O/c16-12-9-6-10(14-12)15-5-1-2-7(9)8-3-4-13-11(8)15/h1-6, 13H                                 |
| <b>B-142</b>   |  | 20, 5455 | 216, 7082 | -7, 8283  | 46, 5778  | 300, 2691 | InChI=1S/C12H7N3O/c16-12-11(14-12)10-6-8-7(3-4-13-8)9-2-1-5-15(9)10/h1-6, 13H                                 |



|                |                                                                                     |         |          |          |          |          |                                                                                                                       |
|----------------|-------------------------------------------------------------------------------------|---------|----------|----------|----------|----------|-----------------------------------------------------------------------------------------------------------------------|
| <b>r-44</b>    |    | 9.1747  | 111.8845 | -4.6926  | 152.6189 | 300.3489 | InChI=1S/C12H7N3O/c16-12-10-8-3-1-2-7-4-5-13-11(7)14-15(12)9(10)6-8/h1-6H, (H, 13, 14)/b3-1-, 7-2-                    |
|                | $C_{12}H_7N_3O$                                                                     |         |          |          |          |          |                                                                                                                       |
| <b>r-39</b>    |    | 15.2313 | 161.1512 | -8.4927  | 115.6467 | 300.4079 | InChI=1S/C12H7N3O/c16-12-10-8-3-1-2-7-4-5-13-11(7)14-15(12)6-9(8)10/h1-6H, (H, 13, 14)/b3-1-, 7-2-                    |
|                | $C_{12}H_7N_3O$                                                                     |         |          |          |          |          |                                                                                                                       |
| <b>H1-38</b>   |    | 20.842  | 169.4887 | -11.5396 | 85.1789  | 300.9023 | InChI=1S/C12H7N3O/c16-10-3-1-2-8-7-4-5-13-12(7)14-11(10)9-6-15(8)9/h1-6, 13H/b3-1-, 8-2-                              |
|                | $C_{12}H_7N_3O$                                                                     |         |          |          |          |          |                                                                                                                       |
| <b>B-143</b>   |    | 7.9237  | 116.0139 | -4.2187  | 153.4215 | 301.0019 | InChI=1S/C12H7N3O/c16-12-11-10-6-9-7(3-4-13-9)8(14-11)2-1-5-15(10)12/h1-6, 13H/b5-1-, 8-2?                            |
|                | $C_{12}H_7N_3O$                                                                     |         |          |          |          |          |                                                                                                                       |
| <b>A-112</b>   |    | 2.5761  | 304.6855 | -2.3943  | -4.24    | 301.0355 | InChI=1S/C12H7N3O/c16-12-10(8-6-14-8)11-7(3-4-13-11)9-2-1-5-15(9)12/h1-6, 13H/b14-8+                                  |
|                | $C_{12}H_7N_3O$                                                                     |         |          |          |          |          |                                                                                                                       |
| <b>o-125</b>   |    | 3.4669  | 90.7347  | -2.1484  | 184.6101 | 301.1951 | InChI=1S/C12H7N3O/c16-11-7-2-1-5-15(12-8(11)6-14-12)9-3-4-13-10(7)9/h1-6, 13H                                         |
|                | $C_{12}H_7N_3O$                                                                     |         |          |          |          |          |                                                                                                                       |
| <b>x4-3</b>    |    | 6.4604  | 41.5972  | -5.2892  | 223.7605 | 301.4445 | InChI=1S/C12H7N3O/c16-9-6-14-15-8-3-1-2-7-4-5-13-11(7)12(15)10(8)9/h1-6, 13H/b2-1-, 3-1-, 7-2-, 8-3+, 12-11+          |
|                | $C_{12}H_7N_3O$                                                                     |         |          |          |          |          |                                                                                                                       |
| <b>H11-148</b> |    | 13.8732 | 128.2455 | -11.2374 | 135.8671 | 301.4773 | InChI=1S/C12H7N3O/c16-12-8-2-1-3-9(14-15-6-10(12)15)11-7(8)4-5-13-11/h1-6, 13H/b14-9+                                 |
|                | $C_{12}H_7N_3O$                                                                     |         |          |          |          |          |                                                                                                                       |
| <b>C-2</b>     |    | 40.2315 | 253.1360 | -17.3688 | 11.6605  | 301.5344 | InChI=1S/C12H7N3O/c16-10-6-9(10)15-12-8(2-1-4-14-15)7-3-5-13-11(7)12/h1-6, 13H                                        |
|                | $C_{12}H_7N_3O$                                                                     |         |          |          |          |          |                                                                                                                       |
| <b>r-34</b>    |   | 8.8097  | 161.6291 | -2.6475  | 124.8409 | 301.6949 | InChI=1S/C12H7N3O/c16-12-8-3-1-2-7-4-5-13-11(7)14-10-6-9(8)15(10)12/h1-6H, (H, 13, 14)                                |
|                | $C_{12}H_7N_3O$                                                                     |         |          |          |          |          |                                                                                                                       |
| <b>X22-47</b>  |  | 19.6785 | 189.6369 | -14.7218 | 89.7401  | 301.9421 | InChI=1S/C12H7N3O/c16-12-9-6-15(9)8-2-1-4-13-7-3-5-14-11(7)10(8)12/h1-6, 14H/b2-1-, 4-1-, 8-2+, 11-10-, 13-4-, 13-7-  |
|                | $C_{12}H_7N_3O$                                                                     |         |          |          |          |          |                                                                                                                       |
| <b>s11-35</b>  |  | 6.8559  | 133.6553 | -4.6747  | 135.9639 | 302.0117 | InChI=1S/C12H7N3O/c16-12-8-6-10-9(14-15(10)12)3-1-2-7-4-5-13-11(7)8/h1-6, 13H/b3-1-, 7-2-, 11-8-                      |
|                | $C_{12}H_7N_3O$                                                                     |         |          |          |          |          |                                                                                                                       |
| <b>H1-58</b>   |  | 4.9507  | 43.5491  | -1.7905  | 221.3928 | 302.2293 | InChI=1S/C12H7N3O/c16-10-3-1-2-9-7-4-5-13-11(7)12-8(10)6-15(9)14-12/h1-6, 13H/b3-1-, 9-2-                             |
|                | $C_{12}H_7N_3O$                                                                     |         |          |          |          |          |                                                                                                                       |
| <b>s12-17</b>  |  | 40.5849 | 173.1501 | -25.5486 | 87.8927  | 302.2481 | InChI=1S/C12H7N3O/c16-12-10-11(12)15(10)14-8-3-1-2-7-4-5-13-9(7)6-8/h1-6, 13H/b14-8+                                  |
|                | $C_{12}H_7N_3O$                                                                     |         |          |          |          |          |                                                                                                                       |
| <b>x9-3</b>    |  | 20.3066 | 195.0032 | -16.5436 | 60.362   | 302.4612 | InChI=1S/C12H7N3O/c16-9-6-14-12-11-8(15(11)12)3-1-2-7-4-5-13-10(7)9/h1-6, 13H/b2-1-, 8-3-, 14-6-                      |
|                | $C_{12}H_7N_3O$                                                                     |         |          |          |          |          |                                                                                                                       |
| <b>H1-40</b>   |  | 7.4167  | 152.8202 | -1.2914  | 121.3212 | 302.5034 | InChI=1S/C12H7N3O/c16-11-3-1-2-7-8-4-5-13-12(8)15-10(7)6-9(11)14-15/h1-6, 13H/b3-1-, 7-2-                             |
|                | $C_{12}H_7N_3O$                                                                     |         |          |          |          |          |                                                                                                                       |
| <b>n-127</b>   |  | 11.1374 | 219.357  | -3.7543  | 51.0967  | 302.5613 | InChI=1S/C12H7N3O/c16-9-6-14-11-7-2-1-5-15(9)8-3-4-13-12(8)10(7)11/h1-6, 13H/b5-1-, 7-2-, 14-6-                       |
|                | $C_{12}H_7N_3O$                                                                     |         |          |          |          |          |                                                                                                                       |
| <b>B-83</b>    |  | 7.5012  | 37.0390  | -2.2485  | 218.6705 | 302.5676 | InChI=1S/C12H7N3O/c16-12-10-6-9-7(2-1-5-15(10)14-9)8-3-4-13-11(8)12/h1-6, 13H                                         |
|                | $C_{12}H_7N_3O$                                                                     |         |          |          |          |          |                                                                                                                       |
| <b>X22-54</b>  |  | 19.2882 | 188.397  | -14.5791 | 91.3053  | 302.646  | InChI=1S/C12H7N3O/c16-12-7-2-1-4-13-8-3-5-14-10(8)11(7)15-6-9(12)15/h1-6, 14H/b2-1-, 4-1-, 7-2+, 11-10-, 13-4-, 13-8- |
|                | $C_{12}H_7N_3O$                                                                     |         |          |          |          |          |                                                                                                                       |

|               |                                                                                                        |         |          |          |          |          |                                                                                                    |
|---------------|--------------------------------------------------------------------------------------------------------|---------|----------|----------|----------|----------|----------------------------------------------------------------------------------------------------|
| <b>H-9</b>    |                       | 8.794   | 148.9752 | -3.2451  | 128.2602 | 302.6714 | InChI=1S/C12H7N3O/c16-11-7-2-1-3-10-8-4-5-13-12(8)15(10)14-9(11)6-7/h1-6,13h/b2-1-,10-3-,14-9-     |
| <b>H11-96</b> | <br>$C_{12}H_7N_3O$   | 7.3353  | 41.4689  | -3.0228  | 221.087  | 302.8328 | InChI=1S/C12H7N3O/c16-12-8-2-1-3-10-9(6-15(12)14-10)11-7(8)4-5-13-11/h1-6,13h/b3-1-,8-2-           |
| <b>s11-63</b> | <br>$C_{12}H_7N_3O$   | 20.0209 | 138.1235 | -13.7646 | 115.304  | 302.8552 | InChI=1S/C12H7N3O/c16-12-10-8-6-15(8)9(14-12)3-1-2-7-4-5-13-11(7)10/h1-6,13h/b3-1-,7-2-,11-10+     |
| <b>I-80</b>   | <br>$C_{12}H_7N_3O$   | 15.5783 | 194.0006 | -7.7059  | 78.5793  | 302.9181 | InChI=1S/C12H7N3O/c16-9-6-7-10-11-8(2-4-14-11)15(12(7)10)5-1-3-13-9/h1-6,14h/b5-1-,7-6-,13-3-      |
| <b>s12-46</b> | <br>$C_{12}H_7N_3O$   | 10.1718 | 178.9314 | -6.6244  | 86.38    | 303.2843 | InChI=1S/C12H7N3O/c16-11-8-3-1-2-7-4-5-13-9(7)6-15-10(11)12(15)14-8/h1-6,13h/b3-1-,7-2-,9-6-       |
| <b>G-22</b>   | <br>$C_{12}H_7N_3O$   | 5.4373  | 135.5597 | -2.0593  | 151.1189 | 303.5955 | InChI=1S/C12H7N3O/c16-12-9-3-1-2-8(11-14-6-15(11)12)7-4-5-13-10(7)9/h1-6,13h                       |
| <b>A2-11</b>  | <br>$C_{12}H_7N_3O$   | 4.6757  | 95.9807  | -2.2352  | 182.6854 | 303.6264 | InChI=1S/C12H7N3O/c16-12-8-6-10-13-4-1-2-9(15(10)12)7-3-5-14-11(7)8/h1-6,14h                       |
| <b>H11-43</b> | <br>$C_{12}H_7N_3O$   | 7.4931  | 43.2313  | -2.9238  | 222.7176 | 303.6958 | InChI=1S/C12H7N3O/c16-12-9-6-7-2-1-3-10(14-9)15(12)11-8(7)4-5-13-11/h1-6,13h/b2-1-,3-1-,7-2-,10-3- |
| <b>X22-39</b> | <br>$C_{12}H_7N_3O$   | 30.021  | 249.9632 | -15.4549 | 20.7086  | 303.7422 | InChI=1S/C12H7N3O/c16-10-6-9-12-8(15(9)12)2-1-4-13-7-3-5-14-11(7)10/h1-6,14h/b2-1-,9-6-,13-4-      |
| <b>s12-44</b> | <br>$C_{12}H_7N_3O$  | 10.5576 | 220.9262 | -7.8409  | 55.6651  | 304.045  | InChI=1S/C12H7N3O/c16-9-6-8-7(4-5-13-8)2-1-3-10-14-12-11(9)15(10)12/h1-6,13h/b3-1-,7-2-,8-6+       |
| <b>H11-78</b> | <br>$C_{12}H_7N_3O$ | 7.3305  | 44.4049  | -3.2601  | 218.1927 | 304.2572 | InChI=1S/C12H7N3O/c16-12-11-8(4-5-13-11)7-2-1-3-10-14-9(7)6-15(10)12/h1-6,13h                      |
| <b>H11-93</b> | <br>$C_{12}H_7N_3O$ | 4.9465  | 185.128  | -1.6694  | 98.7347  | 304.3009 | InChI=1S/C12H7N3O/c16-12-8-2-1-3-9-10(6-14-9)15(12)11-7(8)4-5-13-11/h1-6,13h/b3-1-,8-2-            |
| <b>B-10</b>   | <br>$C_{12}H_7N_3O$ | 41.4955 | 254.0969 | -17.8805 | 11.8608  | 304.4054 | InChI=1S/C12H7N3O/c16-10-6-9(10)15-5-1-2-7-8-3-4-13-11(8)12(7)14-15/h1-6,13h                       |
| <b>k-8</b>    | <br>$C_{12}H_7N_3O$ | 26.418  | 158.8026 | -7.2203  | 80.5648  | 304.5097 | InChI=1S/C12H7N3O/c16-12-7-6-9-11(12)15(9)5-1-3-13-8-2-4-14(7)8/h1-6,14h/b5-1-,13-3-               |
| <b>I-84</b>   | <br>$C_{12}H_7N_3O$ | 9.7814  | 72.3471  | -3.7419  | 186.2711 | 304.7295 | InChI=1S/C12H7N3O/c16-12-10-7-6-9(10)15(5-1-3-13-7)8-2-4-14-11(8)12/h1-6,14h/b5-1-,13-3-           |
| <b>o-162</b>  | <br>$C_{12}H_7N_3O$ | 16.7362 | 207.4445 | -10.2922 | 69.3679  | 304.862  | InChI=1S/C12H7N3O/c16-12-8-2-1-5-15(12)10-3-4-13-11(10)7-6-9(7)14-8/h1-6,13h/b14-9-                |
| <b>n-190</b>  | <br>$C_{12}H_7N_3O$ | 19.5651 | 220.5445 | -14.3328 | 49.744   | 304.9913 | InChI=1S/C12H7N3O/c16-12-10-7(8(10)6-14-12)2-1-5-15-9-3-4-13-11(9)15/h1-6,13h/b5-1-,7-2-           |
| <b>n-101</b>  | <br>$C_{12}H_7N_3O$ | 19.5658 | 220.5332 | -14.3324 | 49.7448  | 304.9966 | InChI=1S/C12H7N3O/c16-12-10-7(8(10)6-14-12)2-1-5-15-9-3-4-13-11(9)15/h1-6,13h/b5-1-,7-2+           |
| <b>B-99</b>   | <br>$C_{12}H_7N_3O$ | 13.4720 | 250.1730 | -7.7562  | 27.7937  | 305.1494 | InChI=1S/C12H7N3O/c16-12-11-7(3-4-13-11)9-2-1-5-15(9)10-6-8(10)14-12/h1-6,13h/b14-8-               |

|                |                                                                                     |          |           |           |           |           |                                                                                                                 |
|----------------|-------------------------------------------------------------------------------------|----------|-----------|-----------|-----------|-----------|-----------------------------------------------------------------------------------------------------------------|
| <b>E-55</b>    |    | 29, 0313 | 155, 8931 | -17, 3916 | 104, 0143 | 305, 169  | InChI=1S/C12H7N3O/c16-12-8-2-1-3-9(14-12)7-4-5-13-11(7)15-6-10(8)15/h1-6, 13H                                   |
|                | $C_{12}H_7N_3O$                                                                     |          |           |           |           |           |                                                                                                                 |
| <b>n-7</b>     |    | 18, 9768 | 222, 2016 | -14, 1298 | 49, 7678  | 305, 3636 | InChI=1S/C12H7N3O/c16-9-6-14-11-7(10(9)11)2-1-5-15-8-3-4-13-12(8)15/h1-6, 13H/b5-1-, 7-2-                       |
|                | $C_{12}H_7N_3O$                                                                     |          |           |           |           |           |                                                                                                                 |
| <b>A1-50</b>   |    | 26, 9993 | 219, 4469 | -13, 2157 | 37, 4615  | 305, 5073 | InChI=1S/C12H7N3O/c16-12-10-7(3-5-14-10)8-2-1-4-13-6-9-11(12)15(8)9/h1-6, 14H/b4-1-, 8-2-, 13-6-                |
|                | $C_{12}H_7N_3O$                                                                     |          |           |           |           |           |                                                                                                                 |
| <b>H1-39</b>   |    | 19, 6153 | 188, 8091 | -10, 0866 | 79, 9601  | 305, 5401 | InChI=1S/C12H7N3O/c16-10-3-1-2-8-7-4-5-13-12(7)15-6-9(15)11(10)14-8/h1-6, 13H                                   |
|                | $C_{12}H_7N_3O$                                                                     |          |           |           |           |           |                                                                                                                 |
| <b>G1-61</b>   |    | 1, 8677  | 311, 2616 | -2, 0541  | -8, 83    | 305, 589  | InChI=1S/C12H7N3O/c16-9-3-1-2-7-8-4-5-13-11(8)12(10(7)9)15-6-14-15/h1-6, 13H                                    |
|                | $C_{12}H_7N_3O$                                                                     |          |           |           |           |           |                                                                                                                 |
| <b>H11-98</b>  |    | 8, 3586  | 133, 4658 | -0, 7802  | 134, 8468 | 305, 8243 | InChI=1S/C12H7N3O/c16-12-9-6-7-2-1-3-10(14-12)15(9)11-8(7)4-5-13-11/h1-6, 13H/b3-1-, 7-2+                       |
|                | $C_{12}H_7N_3O$                                                                     |          |           |           |           |           |                                                                                                                 |
| <b>H11-124</b> |    | 10, 2981 | 201, 26   | -0, 3261  | 66, 6895  | 306, 2006 | InChI=1S/C12H7N3O/c16-10-6-11-14-8(10)2-1-3-9-7-4-5-13-12(7)15(9)11/h1-6, 13H/b2-1-, 9-3-                       |
|                | $C_{12}H_7N_3O$                                                                     |          |           |           |           |           |                                                                                                                 |
| <b>G-35</b>    |    | 1, 9851  | 310, 9121 | -1, 9498  | -9, 89    | 306, 3266 | InChI=1S/C12H7N3O/c16-12-10-7(8-4-5-13-11(8)12)2-1-3-9(10)15-6-14-15/h1-6, 13H                                  |
|                | $C_{12}H_7N_3O$                                                                     |          |           |           |           |           |                                                                                                                 |
| <b>x6-34</b>   |    | 23, 7337 | 156, 1097 | -9, 1143  | 107, 2446 | 306, 5943 | InChI=1S/C12H7N3O/c16-10-3-1-2-7-4-5-13-9(7)6-8-11(10)15-12(8)14-15/h1-6, 13H/b3-1-, 7-2-, 9-6+                 |
|                | $C_{12}H_7N_3O$                                                                     |          |           |           |           |           |                                                                                                                 |
| <b>r-57</b>    |   | 31, 2949 | 250, 4438 | -15, 5206 | 19, 774   | 306, 6803 | InChI=1S/C12H7N3O/c16-10-6-9-11-8(15(9)11)3-1-2-7-4-5-13-12(7)14-10/h1-6H, 13, 14, 16                           |
|                | $C_{12}H_7N_3O$                                                                     |          |           |           |           |           |                                                                                                                 |
| <b>A1-51</b>   |  | 34, 5919 | 248, 2518 | -17, 3154 | 23, 0055  | 306, 7655 | InChI=1S/C12H7N3O/c16-11-8-6-13-4-1-2-9-7-3-5-14-12(7)15(9)10(8)11/h1-6, 14H/b4-1-, 9-2-, 13-6+                 |
|                | $C_{12}H_7N_3O$                                                                     |          |           |           |           |           |                                                                                                                 |
| <b>o-10</b>    |  | 6, 7797  | 110, 1949 | -1, 4068  | 152, 7016 | 306, 8749 | InChI=1S/C12H7N3O/c16-11-7-2-1-5-15-8-3-4-13-12(8)14-10(11)9(15)6-7/h1-6, 13H                                   |
|                | $C_{12}H_7N_3O$                                                                     |          |           |           |           |           |                                                                                                                 |
| <b>C-16</b>    |  | 18, 9666 | 197, 6738 | -14, 4028 | 79, 0292  | 307, 0189 | InChI=1S/C12H7N3O/c16-12-10-6-9(10)7-2-1-4-14-15(12)11-8(7)3-5-13-11/h1-6, 13H/b2-1-, 14-4-                     |
|                | $C_{12}H_7N_3O$                                                                     |          |           |           |           |           |                                                                                                                 |
| <b>k-19</b>    |  | 30, 4342 | 225, 9135 | -12, 0752 | 55, 6604  | 307, 0989 | InChI=1S/C12H7N3O/c16-12-7-6-9-10-8(2-4-14-10)13-3-1-5-15(9)11(7)12/h1-6, 14H/b5-1-, 13-3+                      |
|                | $C_{12}H_7N_3O$                                                                     |          |           |           |           |           |                                                                                                                 |
| <b>C-6</b>     |  | 8, 0074  | 64, 1834  | -4, 5520  | 202, 2741 | 307, 2047 | InChI=1S/C12H7N3O/c16-11-9-6-10(11)15-12-8(3-5-13-12)7(9)2-1-4-14-15/h1-6, 13H/b2-1-, 14-4-                     |
|                | $C_{12}H_7N_3O$                                                                     |          |           |           |           |           |                                                                                                                 |
| <b>A2-42</b>   |  | 12, 4027 | 163, 8404 | -2, 0406  | 114, 4077 | 307, 2167 | InChI=1S/C12H7N3O/c16-10-6-9-12-11-7(3-5-14-11)8(15(9)10)2-1-4-13-12/h1-6, 14H/b2-1-, 4-1-, 8-2+, 13-4-, 13-12- |
|                | $C_{12}H_7N_3O$                                                                     |          |           |           |           |           |                                                                                                                 |
| <b>A-37</b>    |  | 29, 2812 | 227, 6797 | -10, 7759 | 35, 6279  | 307, 2906 | InChI=1S/C12H7N3O/c16-12-8-6-14-15-5-1-2-9(15)7-3-4-13-11(7)10(8)12/h1-6, 13H/b4-6-                             |
|                | $C_{12}H_7N_3O$                                                                     |          |           |           |           |           |                                                                                                                 |
| <b>n-177</b>   |  | 5, 8192  | 180, 2048 | -2, 1477  | 103, 3098 | 307, 5775 | InChI=1S/C12H7N3O/c16-12-10-7-6-14-8(7)2-1-5-15(12)9-3-4-13-11(9)10/h1-6, 13H/b5-1-, 8-2-, 10-7-                |
|                | $C_{12}H_7N_3O$                                                                     |          |           |           |           |           |                                                                                                                 |
| <b>H1-3</b>    |  | 10, 6413 | 232, 0947 | -6, 4387  | 49, 5121  | 307, 7018 | InChI=1S/C12H7N3O/c16-10-3-1-2-7-8-4-5-13-11(8)12(7)14-15-6-9(10)15/h1-6, 13H/b3-1-, 7-2-, 14-12+               |
|                | $C_{12}H_7N_3O$                                                                     |          |           |           |           |           |                                                                                                                 |

|               |                                                                                     |         |          |          |          |          |                                                                                                              |
|---------------|-------------------------------------------------------------------------------------|---------|----------|----------|----------|----------|--------------------------------------------------------------------------------------------------------------|
| <b>A-107</b>  |    | 24.0724 | 209.0615 | -8.7431  | 54.245   | 307.7393 | InChI=1S/C12H7N3O/c16-11-7-2-1-5-15-9(10(11)15)6-14-12-8(7)3-4-13-12/h1-6,13H/b14-6-                         |
| <b>x6-39</b>  |    | 20.5695 | 236.8543 | -10.214  | 44.2202  | 307.8399 | InChI=1S/C12H7N3O/c16-9-3-1-2-7-4-5-13-8(7)6-10-14-12-11(9)15(10)12/h1-6,13H/b3-1-,7-2-,8-6-                 |
| <b>x4-33</b>  |    | 10.4858 | 138.1653 | -4.4392  | 134.0543 | 307.8787 | InChI=1S/C12H7N3O/c16-12-10-8-6-14-15(12)9(10)3-1-2-7-4-5-13-11(7)8/h1-6,13H/b2-1-,3-1-,7-2-,9-3+,11-8+      |
| <b>H-108</b>  |    | 18.1378 | 217.4184 | -7.3148  | 61.0241  | 307.9327 | InChI=1S/C12H7N3O/c16-12-11-14-6-7-2-1-3-8(7)9-4-5-13-10(9)15(11)12/h1-6,13H/b7-6-,14-11-                    |
| <b>n-36</b>   |    | 26.6206 | 224.327  | -10.1106 | 50.3647  | 308.1897 | InChI=1S/C12H7N3O/c16-12-10-9-2-1-5-15(9)8-3-4-13-7(8)6-14-11(10)12/h1-6,13H/b14-6+                          |
| <b>p11-13</b> |    | 13.4443 | 227.119  | -8.2575  | 53.2706  | 308.2052 | InChI=1S/C12H7N3O/c16-11-9-3-1-2-7-4-5-13-8(7)6-14-12-10(11)15(9)12/h1-6,13H/b2-1-,9-3-,14-6-                |
| <b>o-67</b>   |    | 6.9898  | 112.3869 | -1.3514  | 148.2508 | 308.2365 | InChI=1S/C12H7N3O/c16-12-10-8(3-4-13-10)15-5-1-2-7-6-9(15)11(12)14-7/h1-6,13H                                |
| <b>B-18</b>   |    | 6.5229  | 144.6333 | -2.0717  | 127.7113 | 308.2606 | InChI=1S/C12H7N3O/c16-10-6-9-7-2-1-5-15(14-11(9)10)12-8(7)3-4-13-12/h1-6,13H                                 |
| <b>B-63</b>   |    | 16.1107 | 153.8981 | -13.4576 | 130.0974 | 308.3420 | InChI=1S/C12H7N3O/c16-12-8-6-10(8)14-9-2-1-5-15(12)11-7(9)3-4-13-11/h1-6,13H/b14-10-                         |
| <b>q-54</b>   |   | 18.2331 | 201.0827 | -3.348   | 81.7647  | 308.3466 | InChI=1S/C12H7N3O/c16-12-8-3-1-2-7-4-5-13-11(7)9(8)6-10-14-15(10)12/h1-6,13H                                 |
| <b>r-55</b>   |  | 10.6421 | 262.9812 | -6.3266  | 35.5792  | 308.3575 | InChI=1S/C12H7N3O/c16-10-6-9-11(15(9)10)8-3-1-2-7-4-5-13-12(7)14-8/h1-6H,13,14)/b11-8-                       |
| <b>H-72</b>   |  | 7.0436  | 43.349   | -2.2995  | 228.6278 | 308.4244 | InChI=1S/C12H7N3O/c16-12-9-3-1-2-7-6-15(12)14-10(7)11-8(9)4-5-13-11/h1-6,13H/b2-1-,9-3-                      |
| <b>H-48</b>   |  | 5.5311  | 99.8454  | -2.2335  | 176.073  | 308.4907 | InChI=1S/C12H7N3O/c16-10-6-7-2-1-3-9-8-4-5-13-12(8)11(7)14-15(9)10/h1-6,13H/b2-1-,9-3-                       |
| <b>G1-84</b>  |  | 5.3865  | 187.0784 | -3.431   | 94.5286  | 308.6075 | InChI=1S/C12H7N3O/c16-9-3-1-2-7-6-14-15-11(9)12(15)10-8(7)4-5-13-10/h1-6,13H/b3-1-,7-2+                      |
| <b>x4-57</b>  |  | 18.4226 | 242.8169 | -4.4932  | 36.7144  | 308.7869 | InChI=1S/C12H7N3O/c16-12-8-3-1-2-7-4-5-13-9(7)10-11(14-6-8)15(10)12/h1-6,13H/b2-1-,3-1-,7-2-,8-3-,10-9+      |
| <b>B-4</b>    |  | 10.3668 | 303.4465 | -3.2479  | -3.9087  | 308.7922 | InChI=1S/C12H7N3O/c16-10-6-8(10)12-14-11-7(3-4-13-11)9-2-1-5-15(9)12/h1-6,13H                                |
| <b>s12-39</b> |  | 14.7554 | 190.8557 | -6.4966  | 81.1357  | 308.8113 | InChI=1S/C12H7N3O/c16-12-8-3-1-2-7-4-5-13-9(7)6-10-11(14-8)15(10)12/h1-6,13H/b2-1-,3-1-,7-2-,8-3-,9-6-,10-6- |
| <b>E-17</b>   |  | 5.5457  | 79.9682  | -1.908   | 193.8849 | 308.8335 | InChI=1S/C12H7N3O/c16-12-10-6-7-2-1-3-9(14-12)8-4-5-13-11(8)15(7)10/h1-6,13H/b3-1-,7-2-                      |
| <b>o-215</b>  |  | 14.7878 | 143.457  | -12.4736 | 138.6018 | 308.8979 | InChI=1S/C12H7N3O/c16-12-8-6-9(14-12)7(8)2-1-5-15-10-3-4-13-11(10)15/h1-6,13H/b5-1-,7-2+                     |

|               |                                                                                                              |         |          |          |          |          |                                                                                                           |
|---------------|--------------------------------------------------------------------------------------------------------------|---------|----------|----------|----------|----------|-----------------------------------------------------------------------------------------------------------|
| <b>n-132</b>  | <br><chem>C12H9N3O</chem>   | 2.4709  | 304.0531 | -2.2557  | -3.31    | 308.928  | InChI=1S/C12H7N3O/c16-12-10(7-6-14-7)8-2-1-5-15(8)9-3-4-13-11(9)12/h1-6,13H/b10-7+                        |
| <b>E-42</b>   | <br><chem>C12H9N3O</chem>   | 8.2856  | 144.3312 | -2.6235  | 117.6    | 308.9398 | InChI=1S/C12H7N3O/c16-11-6-10-8-2-1-3-9(14-15(10)11)7-4-5-13-12(7)8/h1-6,13H                              |
| <b>H1-69</b>  | <br><chem>C12H9N3O</chem>   | 17.7727 | 173.9    | -2.2712  | 100.868  | 308.9584 | InChI=1S/C12H7N3O/c16-7-2-1-3-8-9-4-5-13-11(9)12-14-15(12)10(8)6-7/h1-6,13H                               |
| <b>p-27</b>   | <br><chem>C12H9N3O</chem>   | 10.671  | 137.7607 | -7.1259  | 139.2835 | 309.412  | InChI=1S/C12H7N3O/c16-12-9-3-1-2-7-4-5-13-8(7)6-10-11(14-12)15(9)10/h1-6,13H/b2-1-,9-3-,10-6-             |
| <b>H1-61</b>  | <br><chem>C12H9N3O</chem>   | 18.4604 | 160.361  | -4.5148  | 117.174  | 309.6399 | InChI=1S/C12H7N3O/c16-10-3-1-2-9-7-4-5-13-11(7)12-8(14-12)6-15(9)10/h1-6,13H                              |
| <b>H11-77</b> | <br><chem>C12H9N3O</chem>   | 5.384   | 111.0578 | -1.6609  | 167.7345 | 309.7541 | InChI=1S/C12H7N3O/c16-12-11-8(4-5-13-11)7-2-1-3-10-14-6-9(7)15(10)12/h1-6,13H                             |
| <b>q-20</b>   | <br><chem>C12H9N3O</chem>   | 7.7586  | 151.8445 | -2.8499  | 105.595  | 309.8593 | InChI=1S/C12H7N3O/c16-12-11-8-3-1-2-7-4-5-13-10(7)9(6-8)15(12)14-11/h1-6,13H/b2-1-,3-1-,7-2-,8-3-,10-9-   |
| <b>o-188</b>  | <br><chem>C12H9N3O</chem>   | 10.3032 | 302.596  | -3.2276  | -3.9779  | 309.8834 | InChI=1S/C12H7N3O/c16-10-6-7(10)11-8-2-1-5-15(8)9-3-4-13-12(9)14-11/h1-6,13H                              |
| <b>F-61</b>   | <br><chem>C12H9N3O</chem>  | 20.0377 | 139.1646 | -13.1334 | 120.613  | 310.295  | InChI=1S/C12H7N3O/c16-12-9-3-1-2-7(10-6-15(9)10)8-4-5-13-11(8)14-12/h1-6H,13,14,16                        |
| <b>I-63</b>   | <br><chem>C12H9N3O</chem> | 12.0989 | 265.2713 | -9.7472  | 26.4171  | 310.3671 | InChI=1S/C12H7N3O/c16-9-6-7-10(9)11(7)15-5-1-3-13-12-8(15)2-4-14-12/h1-6,14H                              |
| <b>A-59</b>   | <br><chem>C12H9N3O</chem> | 2.7376  | 304.7561 | -2.2573  | -4.31    | 310.4219 | InChI=1S/C12H7N3O/c16-12-10-7(3-4-13-10)9-2-1-5-15(9)11(12)8-6-14-8/h1-6,13H/b11-8+                       |
| <b>A-103</b>  | <br><chem>C12H9N3O</chem> | 2.737   | 304.7563 | -2.2566  | -4.31    | 310.4219 | InChI=1S/C12H7N3O/c16-12-10-7(3-4-13-10)9-2-1-5-15(9)11(12)8-6-14-8/h1-6,13H/b11-8-                       |
| <b>B-1</b>    | <br><chem>C12H9N3O</chem> | 10.3706 | 304.5912 | -3.2159  | -4.8400  | 310.4467 | InChI=1S/C12H7N3O/c16-10-6-8(10)12-11-7(3-4-13-11)9-2-1-5-15(9)14-12/h1-6,13H                             |
| <b>x6-35</b>  | <br><chem>C12H9N3O</chem> | 23.0123 | 151.9938 | -10.935  | 118.592  | 310.4601 | InChI=1S/C12H7N3O/c16-9-3-1-2-7-4-5-13-8(7)6-15-11(9)10-12(15)14-10/h1-6,13H/b3-1-,7-2-,8-6+              |
| <b>C-5</b>    | <br><chem>C12H9N3O</chem> | 4.7265  | 104.6521 | -2.1768  | 172.1481 | 310.7083 | InChI=1S/C12H7N3O/c16-12-9-6-15-11(12)8(2-1-4-14-15)7-3-5-13-10(7)9/h1-6,13H                              |
| <b>H1-103</b> | <br><chem>C12H9N3O</chem> | 6.8398  | 88.0435  | -4.8906  | 189.5491 | 310.8708 | InChI=1S/C12H7N3O/c16-10-3-1-2-7-8-4-5-13-11(8)15-6-9(7)12(14-10/h1-6,13H/b3-1-,7-2-,14-12+               |
| <b>A2-70</b>  | <br><chem>C12H9N3O</chem> | 16.7605 | 141.4378 | -11.7505 | 119.1067 | 311.096  | InChI=1S/C12H7N3O/c16-12-9-6-15(9)8-2-1-4-13-11(12)10-7(8)3-5-14-10/h1-6,14H/b2-1-,4-1-,8-2-,13-4-,13-11+ |
| <b>I-33</b>   | <br><chem>C12H9N3O</chem> | 31.0903 | 251.7363 | -15.2745 | 22.6369  | 311.3173 | InChI=1S/C12H7N3O/c16-12-7-6-9-11-8(2-4-14-11)15(9)5-1-3-13-10(7)12/h1-6,14H/b5-1-,9-6-,13-3-             |
| <b>n-186</b>  | <br><chem>C12H9N3O</chem> | 5.2656  | 180.5498 | -1.8871  | 106.1715 | 311.3351 | InChI=1S/C12H7N3O/c16-12-9-10-7(6-14-10)2-1-5-15(12)8-3-4-13-11(8)9/h1-6,13H/b5-1-,7-2-,10-9+             |

|               |                                                                                     |                 |         |          |          |          |          |                                                                                                      |
|---------------|-------------------------------------------------------------------------------------|-----------------|---------|----------|----------|----------|----------|------------------------------------------------------------------------------------------------------|
| <b>o-196</b>  |    | $C_{12}H_8N_2O$ | 10.292  | 303.4448 | -3.2463  | -1.9195  | 311.3793 | InChI=1S/C12H7N3O/c16-9-6-7(9)11-12-8(3-4-13-12)15-5-1-2-10(15)14-11/h1-6,13H                        |
| <b>G1-113</b> |    | $C_{12}H_8N_2O$ | 15.5678 | 192.9938 | -7.8869  | 86.8553  | 311.4334 | InChI=1S/C12H7N3O/c16-7-2-1-3-9-8-4-5-13-10(8)11-12(14-6-7)15(9)11/h1-6,13H/b2-1-,9-3-,14-6-         |
| <b>C-3</b>    |    | $C_{12}H_8N_2O$ | 10.7671 | 308.7869 | -3.1372  | -4.7643  | 311.4427 | InChI=1S/C12H7N3O/c16-10-6-9(10)15-11-7(2-1-4-13-11)8-3-5-14-12(8)15/h1-6,14H                        |
| <b>H-99</b>   |    | $C_{12}H_8N_2O$ | 5.557   | 100.0915 | -2.0407  | 182.0111 | 311.4489 | InChI=1S/C12H7N3O/c16-12-10-8(4-5-13-10)9-3-1-2-7-6-14-11(9)15(7)12/h1-6,13H                         |
| <b>n-64</b>   |    | $C_{12}H_8N_2O$ | 2.4733  | 304.3156 | -2.2843  | 0.34     | 311.4764 | InChI=1S/C12H7N3O/c16-12-9-2-1-5-15(9)8-3-4-13-11(8)10(12)7-6-14-7/h1-6,13H/b10-7-                   |
| <b>n-158</b>  |    | $C_{12}H_8N_2O$ | 2.4747  | 304.314  | -2.2851  | 0.34     | 311.4764 | InChI=1S/C12H7N3O/c16-12-9-2-1-5-15(9)8-3-4-13-11(8)10(12)7-6-14-7/h1-6,13H/b10-7+                   |
| <b>C-54</b>   |    | $C_{12}H_8N_2O$ | 9.1065  | 44.1380  | -3.0624  | 224.2046 | 311.6774 | InChI=1S/C12H7N3O/c16-12-9-6-10-11-8(3-5-13-11)7(9)2-1-4-14-15(10)12/h1-6,13H/b2-1-,14-4-            |
| <b>H-129</b>  |    | $C_{12}H_8N_2O$ | 5.3118  | 98.435   | -2.2713  | 184.8172 | 311.7376 | InChI=1S/C12H7N3O/c16-12-10-8-3-1-2-7(6-14-10)15(12)11-9(8)4-5-13-11/h1-6,13H/b2-1-,3-1-,7-2-,8-3-   |
| <b>H1-68</b>  |    | $C_{12}H_8N_2O$ | 27.2378 | 156.5714 | -6.4043  | 101.8232 | 311.7959 | InChI=1S/C12H7N3O/c16-10-3-1-2-7-8-4-5-13-11(8)12-14-15(12)6-9(7)10/h1-6,13H                         |
| <b>r1-17</b>  |   | $C_{12}H_8N_2O$ | 29.3397 | 248.9029 | -15.3466 | 29.2529  | 311.8398 | InChI=1S/C12H7N3O/c16-8-3-1-2-7-4-5-13-11(7)14-12-10-9(6-8)15(10)12/h1-6H, (H,13,14)/b3-1-,7-2-,9-6- |
| <b>o-193</b>  |  | $C_{12}H_8N_2O$ | 10.416  | 306.8439 | -3.1975  | -3.8472  | 311.8672 | InChI=1S/C12H7N3O/c16-10-6-8(10)7-2-1-5-15-9-3-4-13-11(9)14-12(7)15/h1-6,13H                         |
| <b>B-219</b>  |  | $C_{12}H_8N_2O$ | 4.9835  | 33.8328  | -2.1425  | 239.7607 | 311.8971 | InChI=1S/C12H7N3O/c16-12-9-6-15-5-1-2-8(11(15)14-12)7-3-4-13-10(7)9/h1-6,13H                         |
| <b>k-43</b>   |  | $C_{12}H_8N_2O$ | 13.4211 | 178.1531 | -7.9712  | 106.6194 | 311.9131 | InChI=1S/C12H7N3O/c16-12-10-7-6-15(12)5-1-3-13-8-2-4-14-11(8)9(7)10/h1-6,14H/b5-1-,13-3+             |
| <b>F-1</b>    |  | $C_{12}H_8N_2O$ | 10.6378 | 306.5472 | -3.1774  | -4.8266  | 311.9631 | InChI=1S/C12H7N3O/c16-11-6-8(11)10-3-1-2-9-7-4-5-13-12(7)14-15(9)10/h1-6H, (H,13,14)                 |
| <b>H11-53</b> |  | $C_{12}H_8N_2O$ | 6.8963  | 74.9445  | -3.8231  | 208.2216 | 312.0012 | InChI=1S/C12H7N3O/c16-12-9-6-15(12)10-3-1-2-8(14-9)11-7(10)4-5-13-11/h1-6,13H/b14-8-                 |
| <b>o-35</b>   |  | $C_{12}H_8N_2O$ | 14.8701 | 148.4509 | -12.0268 | 136.4392 | 312.2119 | InChI=1S/C12H7N3O/c16-11-8-6-7(10(11)14-8)2-1-5-15-9-3-4-13-12(9)15/h1-6,13H/b5-1-,7-2+              |
| <b>o-104</b>  |  | $C_{12}H_8N_2O$ | 2.8789  | 309.1423 | -2.3387  | -5.3     | 312.489  | InChI=1S/C12H7N3O/c16-12-11(14-12)8-6-7-2-1-5-15(7)9-3-4-13-10(8)9/h1-6,13H                          |
| <b>o-102</b>  |  | $C_{12}H_8N_2O$ | 2.9152  | 309.1682 | -2.3145  | -6.23    | 312.5084 | InChI=1S/C12H7N3O/c16-12-11(14-12)7-6-8-10(3-4-13-8)15-5-1-2-9(7)15/h1-6,13H                         |
| <b>B-8</b>    |  | $C_{12}H_8N_2O$ | 42.9601 | 256.4993 | -17.9518 | 13.2809  | 312.5399 | InChI=1S/C12H7N3O/c16-10-6-8(10)14-12-11-7(3-4-13-11)9-2-1-5-15(9)12/h1-6,13H/b14-12-                |

|               |                                                                                     |         |          |          |          |          |                                                                                                |
|---------------|-------------------------------------------------------------------------------------|---------|----------|----------|----------|----------|------------------------------------------------------------------------------------------------|
| <b>B-49</b>   |    | 4.6223  | 41.2763  | -1.5848  | 234.1641 | 312.5505 | InChI=1S/C12H7N3O/c16-10-6-9-7-2-1-5-15(9)14-12(10)11-8(7)3-4-13-11/h1-6,13H                   |
| <b>I-59</b>   |    | 19.3807 | 144.5724 | -13.8023 | 127.6449 | 312.8513 | InChI=1S/C12H7N3O/c16-12-10-7-6-9(7)15(5-1-3-14-12)8-2-4-13-11(8)10/h1-6,13H/b5-1-,14-3+       |
| <b>I-101</b>  |    | 19.359  | 144.5778 | -13.7938 | 127.6361 | 312.8514 | InChI=1S/C12H7N3O/c16-12-10-7-6-9(7)15(5-1-3-14-12)8-2-4-13-11(8)10/h1-6,13H/b5-1-,14-3-       |
| <b>H-65</b>   |    | 2.5449  | 242.9961 | -1.2733  | 49.2237  | 312.8624 | InChI=1S/C12H7N3O/c16-12-9-3-1-2-7-6-15(7)14-11(12)10-8(9)4-5-13-10/h1-6,13H/b2-1-,9-3-,14-11- |
| <b>o-34</b>   |    | 5.9523  | 34.7442  | -2.3034  | 234.0187 | 312.9849 | InChI=1S/C12H7N3O/c16-11-9-6-7-2-1-5-15(9)8-3-4-13-12(8)14-10(7)11/h1-6,13H                    |
| <b>H11-18</b> |    | 23.2814 | 232.1553 | -5.7974  | 42.6815  | 313.0631 | InChI=1S/C12H7N3O/c16-12-9-3-1-2-8(14-9)7-4-5-13-11(7)10-6-15(10)12/h1-6,13H                   |
| <b>B-233</b>  |    | 2.9313  | 309.8885 | -2.3299  | -5.1700  | 313.1706 | InChI=1S/C12H7N3O/c16-12-11(14-12)8-6-15-5-1-2-9(15)7-3-4-13-10(7)8/h1-6,13H                   |
| <b>I-40</b>   |    | 19.1833 | 274.6317 | -21.4888 | 40.8831  | 313.2456 | InChI=1S/C12H7N3O/c16-12-11-9(2-4-14-11)15(12)5-1-3-13-10-7-6-8(7)10/h1-6,14H/b5-1-,13-3+      |
| <b>p1-60</b>  |   | 6.9333  | 46.1842  | -5.8893  | 238.397  | 313.2881 | InChI=1S/C12H7N3O/c16-9-3-1-2-7-4-5-13-10(7)11-8-6-15(11)12(9)14-8/h1-6,13H/b3-1-,7-2-,11-10+  |
| <b>A-8</b>    |  | 21.772  | 237.3524 | -9.6321  | 39.4809  | 313.3255 | InChI=1S/C12H7N3O/c16-9-6-14-12-8(3-4-13-12)7-2-1-5-15-10(7)11(9)15/h1-6,13H/b14-6-            |
| <b>o-218</b>  |  | 8.1538  | 70.3117  | -2.0678  | 195.134  | 313.509  | InChI=1S/C12H7N3O/c16-12-8-6-9-10(3-4-13-9)15-5-1-2-7(8)11(15)14-12/h1-6,13H                   |
| <b>o-17</b>   |  | 7.2768  | 35.9741  | -1.6428  | 234.7928 | 313.5715 | InChI=1S/C12H7N3O/c16-12-7-2-1-5-15-6-8(7)14-11(12)10-9(15)3-4-13-10/h1-6,13H                  |
| <b>H11-30</b> |  | 19.3321 | 227.2583 | -12.0315 | 71.803   | 313.6043 | InChI=1S/C12H7N3O/c16-12-9-6-15(12)14-10(9)3-1-2-7-8-4-5-13-11(7)8/h1-6,13H/b3-1-,7-2-         |
| <b>o12-2</b>  |  | 25.8203 | 285.5071 | -16.9956 | 10.0278  | 313.75   | InChI=1S/C12H7N3O/c16-12-10-11(15(10)12)14-8-3-1-2-7-4-5-13-9(7)6-8/h1-6,13H/b14-8-            |
| <b>o-205</b>  |  | 6.9058  | 117.4832 | -2.7311  | 166.9211 | 313.8136 | InChI=1S/C12H7N3O/c16-12-9-6-8(14-9)7-2-1-5-15(12)10-3-4-13-11(7)10/h1-6,13H                   |
| <b>D-23</b>   |  | 17.0747 | 173.8824 | -10.2052 | 102.8610 | 313.8785 | InChI=1S/C12H7N3O/c16-12-10-9-6-15(9)8(2-1-4-14-12)7-3-5-13-11(7)10/h1-6,13H/b2-1-,14-4-       |
| <b>q11-44</b> |  | 9.1851  | 119.441  | -5.7176  | 159.3183 | 313.9117 | InChI=1S/C12H7N3O/c16-12-14-11-8-6-15(12)9(8)3-1-2-7-4-5-13-10(7)11/h1-6,13H/b2-1-,9-3+        |
| <b>r-6</b>    |  | 6.4136  | 112.7865 | -4.2017  | 172.3164 | 314.1385 | InChI=1S/C12H7N3O/c16-11-9-6-8-3-1-2-7-4-5-13-12(7)14-15(9)10(8)11/h1-6H,(8,13,14)/b3-1-,7-2-  |
| <b>C-47</b>   |  | 4.0441  | 246.7152 | -2.1891  | 50.2445  | 314.3742 | InChI=1S/C12H7N3O/c16-12-10-7(8-3-5-13-11(8)12)2-1-4-14-15-6-9(10)15/h1-6,13H/b2-1-,14-4-      |

|                |                                                                                     |         |          |          |          |          |                                                                                                                     |
|----------------|-------------------------------------------------------------------------------------|---------|----------|----------|----------|----------|---------------------------------------------------------------------------------------------------------------------|
| <b>n-109</b>   |    | 6.8879  | 94.5107  | -1.7716  | 177.9344 | 314.4407 | InChI=1S/C12H7N3O/c16-9-6-14-7-2-1-5-15-8-3-4-13-11(8)10(7)12(9)15/h1-6,13H                                         |
|                | $C_{12}H_7N_3O$                                                                     |         |          |          |          |          |                                                                                                                     |
| <b>X22-17</b>  |    | 12.9427 | 258.9273 | -8.3136  | 36.5793  | 314.558  | InChI=1S/C12H7N3O/c16-12-10-9(3-5-14-10)13-4-1-2-7-8-6-15(12)11(7)8/h1-6,14H/b2-1-,13-4-                            |
|                | $C_{12}H_7N_3O$                                                                     |         |          |          |          |          |                                                                                                                     |
| <b>H11-9</b>   |    | 7.2846  | 120.2866 | -1.2434  | 156.5472 | 314.8573 | InChI=1S/C12H7N3O/c16-12-14-8-2-1-3-10-7-4-5-13-9(7)6-11(8)15(10)12/h1-6,13H                                        |
|                | $C_{12}H_7N_3O$                                                                     |         |          |          |          |          |                                                                                                                     |
| <b>H-125</b>   |    | 7.8197  | 48.1039  | -2.5023  | 226.1072 | 315.0028 | InChI=1S/C12H7N3O/c16-12-10-6-7-2-1-3-9(14-10)8-4-5-13-11(8)15(7)12/h1-6,13H/b2-1-,3-1-,7-2+,9-3-                   |
|                | $C_{12}H_7N_3O$                                                                     |         |          |          |          |          |                                                                                                                     |
| <b>H1-131</b>  |    | 24.395  | 143.2772 | -10.1126 | 141.074  | 315.0464 | InChI=1S/C12H7N3O/c16-10-3-1-2-7(8-4-5-13-12(8)10)9-6-11-14-15(9)11/h1-6,13H                                        |
|                | $C_{12}H_7N_3O$                                                                     |         |          |          |          |          |                                                                                                                     |
| <b>k-46</b>    |    | 27.787  | 240.7844 | -1.1068  | 46.1786  | 315.1659 | InChI=1S/C12H7N3O/c16-12-8-6-7-10-9(2-4-14-10)13-3-1-5-15(12)11(7)8/h1-6,14H/b5-1-,13-3+                            |
|                | $C_{12}H_7N_3O$                                                                     |         |          |          |          |          |                                                                                                                     |
| <b>C-73</b>    |    | 9.7606  | 178.4313 | -4.4364  | 99.6347  | 315.2187 | InChI=1S/C12H7N3O/c16-12-14-4-1-2-7-8-3-5-13-11(8)10-6-9(7)15(10)12/h1-6,13H/b2-1-,14-4+                            |
|                | $C_{12}H_7N_3O$                                                                     |         |          |          |          |          |                                                                                                                     |
| <b>s12-43</b>  |    | 10.4399 | 245.8797 | -7.155   | 43.6944  | 315.58   | InChI=1S/C12H7N3O/c16-10-6-9-7(4-5-13-9)2-1-3-8-11-12(10)15(11)14-8/h1-6,13H/b3-1-,7-2-,9-6+                        |
|                | $C_{12}H_7N_3O$                                                                     |         |          |          |          |          |                                                                                                                     |
| <b>X-9</b>     |    | 26.7636 | 219.1431 | -12.4290 | 62.8759  | 315.6816 | InChI=1S/C12H7N3O/c16-11-9-10(11)15-6-7(2-1-4-13-9)8-3-5-14-12(8)15/h1-6,14H/b2-1-,13-4-                            |
|                | $C_{12}H_7N_3O$                                                                     |         |          |          |          |          |                                                                                                                     |
| <b>H1-82</b>   |   | 15.7637 | 214.8021 | -17.2171 | 79.2096  | 315.7159 | InChI=1S/C12H7N3O/c16-11-3-1-2-9(7-4-5-13-12(7)11)15-10-6-8(10)14-15/h1-6,13H                                       |
|                | $C_{12}H_7N_3O$                                                                     |         |          |          |          |          |                                                                                                                     |
| <b>j-21</b>    |  | 11.6271 | 215.2692 | -9.5678  | 82.5521  | 315.8051 | InChI=1S/C12H7N3O/c16-12-7-2-1-4-13-8-3-5-14-9(8)6-10-11(7)15(10)12/h1-6,14H/b2-1-,4-1-,7-2+,9-6+,10-6+,13-4-,13-8- |
|                | $C_{12}H_7N_3O$                                                                     |         |          |          |          |          |                                                                                                                     |
| <b>s11-16</b>  |  | 15.5125 | 173.749  | -10.9072 | 110.6101 | 315.847  | InChI=1S/C12H7N3O/c16-12-8-6-15(8)9-3-1-2-7-4-5-13-10(7)11(12)14-9/h1-6,13H/b2-1-,3-1-,7-2-,9-3+,11-10+             |
|                | $C_{12}H_7N_3O$                                                                     |         |          |          |          |          |                                                                                                                     |
| <b>A2-34</b>   |  | 24.5537 | 237.0201 | -13.3672 | 59.2125  | 316.1424 | InChI=1S/C12H7N3O/c16-12-8-6-9(8)13-4-1-2-10-7-3-5-14-11(7)15(10)12/h1-6,14H/b4-1-,10-2-,13-9-                      |
|                | $C_{12}H_7N_3O$                                                                     |         |          |          |          |          |                                                                                                                     |
| <b>H-83</b>    |  | 14.6426 | 209.0033 | -9.6537  | 70.3497  | 316.2562 | InChI=1S/C12H7N3O/c16-12-11-8(4-5-13-11)10-3-1-2-7-6-9(7)14-15(10)12/h1-6,13H/b2-1-,10-3-,14-9-                     |
|                | $C_{12}H_7N_3O$                                                                     |         |          |          |          |          |                                                                                                                     |
| <b>F-28</b>    |  | 12.9435 | 269.8555 | -4.3151  | 32.165   | 316.3337 | InChI=1S/C12H7N3O/c16-12-10-6-14-11-8(4-5-13-11)7-2-1-3-9(7)15(10)12/h1-6H,(H,13,14)/b8-7-,10-6-                    |
|                | $C_{12}H_7N_3O$                                                                     |         |          |          |          |          |                                                                                                                     |
| <b>H-83</b>    |  | 16.3631 | 177.7765 | -11.4741 | 103.5919 | 316.3829 | InChI=1S/C12H7N3O/c16-11-10-9(4-5-13-10)8-3-1-2-7(8)6-15-12(11)14-15/h1-6,13H/b7-6+                                 |
|                | $C_{12}H_7N_3O$                                                                     |         |          |          |          |          |                                                                                                                     |
| <b>x4-31</b>   |  | 9.4491  | 98.3008  | -5.0371  | 174.7189 | 316.59   | InChI=1S/C12H7N3O/c16-12-8-3-1-2-7-4-5-13-9(7)11-10(12)14-6-15(8)11/h1-6,13H/b2-1-,8-3-                             |
|                | $C_{12}H_7N_3O$                                                                     |         |          |          |          |          |                                                                                                                     |
| <b>x6-30</b>   |  | 24.8518 | 158.4784 | -9.4787  | 115.8438 | 316.7002 | InChI=1S/C12H7N3O/c16-10-3-1-2-7-4-5-13-8(7)6-9-11(10)12-14-15(9)12/h1-6,13H/b3-1-,7-2-,8-6+                        |
|                | $C_{12}H_7N_3O$                                                                     |         |          |          |          |          |                                                                                                                     |
| <b>H11-114</b> |  | 9.7836  | 115.6472 | -2.2443  | 162.4648 | 317.2073 | InChI=1S/C12H7N3O/c16-11-9-3-1-2-7-6-10(11)15(14-9)12-8(7)4-5-13-12/h1-6,13H/b3-1-,7-2+                             |
|                | $C_{12}H_7N_3O$                                                                     |         |          |          |          |          |                                                                                                                     |



|               |                                                                                                                                         |         |          |          |          |          |                                                                                                                      |
|---------------|-----------------------------------------------------------------------------------------------------------------------------------------|---------|----------|----------|----------|----------|----------------------------------------------------------------------------------------------------------------------|
| <b>H1-111</b> | 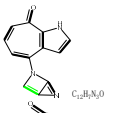<br>C <sub>22</sub> H <sub>20</sub> N <sub>2</sub> O   | 21.8696 | 141.2111 | -11.7677 | 147.5788 | 317.2772 | InChI=1S/C12H7N3O/c16-10-3-1-2-9(7)-4-5-13-11(7)1015-6-8-12(15)14-8/h1-6,13H                                         |
| <b>I-67</b>   | <br>C <sub>22</sub> H <sub>20</sub> N <sub>2</sub> O   | 10.6191 | 309.7027 | -3.3023  | -1.9184  | 317.3861 | InChI=1S/C12H7N3O/c16-9-6-7(9)10-11-8(2-4-13-11)15-5-1-3-14-12(10)15/h1-6,13H                                        |
| <b>x7-7</b>   | <br>C <sub>22</sub> H <sub>20</sub> N <sub>2</sub> O   | 29.981  | 247.4215 | -15.76   | 41.6674  | 317.4129 | InChI=1S/C12H7N3O/c16-9-3-1-2-7-4-5-13-10(7)12-11-8(6-14-9)15(11)12/h1-6,13H/b3-1-,7-2-,12-10-,14-6+                 |
| <b>H1-98</b>  | <br>C <sub>22</sub> H <sub>20</sub> N <sub>2</sub> O   | 24.69   | 144.6163 | -10.2797 | 142.0617 | 317.4648 | InChI=1S/C12H7N3O/c16-10-3-1-2-7(8-4-5-13-11(8)10)9-6-15-12(9)14-15/h1-6,13H                                         |
| <b>C-60</b>   | <br>C <sub>22</sub> H <sub>20</sub> N <sub>2</sub> O   | 27.3000 | 235.8692 | -12.5884 | 40.8583  | 317.7645 | InChI=1S/C12H7N3O/c16-12-10-7(8-3-5-14-11(8)10)2-1-4-13-9-6-15(9)12/h1-6,14H/b2-1-,13-4+                             |
| <b>p1-56</b>  | <br>C <sub>22</sub> H <sub>20</sub> N <sub>2</sub> O   | 10.5399 | 138.1545 | -7.0148  | 149.9369 | 317.8991 | InChI=1S/C12H7N3O/c16-9-3-1-2-7-4-5-13-10(7)11-12-14-6-8(9)15(11)12/h1-6,13H/b3-1-,7-2-,11-10+                       |
| <b>j-15</b>   | <br>C <sub>22</sub> H <sub>20</sub> N <sub>2</sub> O  | 17.3743 | 224.8466 | -9.7016  | 67.7158  | 317.9955 | InChI=1S/C12H7N3O/c16-12-11-7-6-9-8(3-5-14-9)13-4-1-2-10(7)15(11)12/h1-6,14H/b4-1-,9-6+,10-2-,13-8-                  |
| <b>p11-16</b> | <br>C <sub>22</sub> H <sub>20</sub> N <sub>2</sub> O | 15.5012 | 174.0018 | -10.518  | 121.137  | 318.0092 | InChI=1S/C12H7N3O/c16-12-10-11-9(15(11)12)3-1-2-7-4-5-13-8(7)6-14-10/h1-6,13H/b2-1-,3-1-,7-2-,8-6+,9-3+,14-6-,14-10+ |
| <b>q-47</b>   | <br>C <sub>22</sub> H <sub>20</sub> N <sub>2</sub> O | 10.4253 | 143.2734 | -6.3676  | 139.8607 | 318.13   | InChI=1S/C12H7N3O/c16-10-6-9-11-7(4-5-13-11)2-1-3-8-12(14-10)15(8)9/h1-6,13H/b2-1-,8-3-                              |
| <b>o-57</b>   | <br>C <sub>22</sub> H <sub>20</sub> N <sub>2</sub> O | 5.0965  | 33.3123  | -1.7411  | 245.7002 | 318.2781 | InChI=1S/C12H7N3O/c16-11-7-6-9-10(3-4-13-9)15-5-1-2-8(7)14-12(11)15/h1-6,13H                                         |
| <b>o-30</b>   | <br>C <sub>22</sub> H <sub>20</sub> N <sub>2</sub> O | 6.403   | 72.8361  | -2.0772  | 204.76   | 318.3322 | InChI=1S/C12H7N3O/c16-11-8-6-15-5-1-2-7(8)10(11)14-12-9(15)3-4-13-12/h1-6,13H/b14-10-                                |
| <b>G1-35</b>  | <br>C <sub>22</sub> H <sub>20</sub> N <sub>2</sub> O | 15.2986 | 95.351   | -4.1313  | 175.2603 | 318.5861 | InChI=1S/C12H7N3O/c16-9-3-1-2-7-8-4-5-13-12(8)15-6-14-10(7)11(9)15/h1-6,13H                                          |
| <b>j-13</b>   | <br>C <sub>22</sub> H <sub>20</sub> N <sub>2</sub> O | 16.9481 | 229.8972 | -11.6096 | 61.8524  | 318.7452 | InChI=1S/C12H7N3O/c16-12-9-2-1-4-13-7-3-5-14-8(7)6-10-11(12)15(9)10/h1-6,14H/b4-1-,8-6-,9-2-,13-7+                   |
| <b>A1-39</b>  | <br>C <sub>22</sub> H <sub>20</sub> N <sub>2</sub> O | 24.7572 | 244.1837 | -8.8446  | 47.1399  | 318.8529 | InChI=1S/C12H7N3O/c16-12-9-10-7(3-5-14-10)8-2-1-4-13-6-15(8)11(9)12/h1-6,14H                                         |
| <b>H-44</b>   | <br>C <sub>22</sub> H <sub>20</sub> N <sub>2</sub> O | 20.8228 | 204.1442 | -6.3144  | 79.5227  | 319.1696 | InChI=1S/C12H7N3O/c16-10-6-7-2-1-3-8(7)9-4-5-13-11(9)12-14-15(10)12/h1-6,13H/b7-6+                                   |
| <b>H-12</b>   | <br>C <sub>22</sub> H <sub>20</sub> N <sub>2</sub> O | 5.7848  | 34.6729  | -1.4201  | 238.8613 | 319.1793 | InChI=1S/C12H7N3O/c16-12-7-2-1-3-9-8-4-5-13-10(8)11(12)14-15(9)6-7/h1-6,13H                                          |
| <b>B-111</b>  | <br>C <sub>22</sub> H <sub>20</sub> N <sub>2</sub> O | 9.4622  | 61.1771  | -4.2654  | 212.0121 | 319.2151 | InChI=1S/C12H7N3O/c16-12-8-2-1-5-15-9(6-10(15)14-12)11-7(8)3-4-13-11/h1-6,13H/b5-1-,8-2-,14-10+                      |
| <b>j-14</b>   | <br>C <sub>22</sub> H <sub>20</sub> N <sub>2</sub> O | 22.411  | 199.5597 | -13.7771 | 90.4627  | 319.3004 | InChI=1S/C12H7N3O/c16-12-7-2-1-4-13-8-3-5-14-9(8)6-15-10(7)11(12)15/h1-6,14H/b4-1-,7-2-,9-6+,13-8+                   |
| <b>I-87</b>   | <br>C <sub>22</sub> H <sub>20</sub> N <sub>2</sub> O | 6.7931  | 38.4503  | -2.4454  | 234.2248 | 319.3318 | InChI=1S/C12H7N3O/c16-12-9-6-7-10-8(2-4-14-10)15(9)5-1-3-13-11(7)12/h1-6,14H/b5-1-,13-3-                             |

|               |  |         |          |          |          |          |                                                                                                          |
|---------------|--|---------|----------|----------|----------|----------|----------------------------------------------------------------------------------------------------------|
| <b>o-98</b>   |  | 3.1688  | 315.5445 | -2.2232  | -6.23    | 319.4161 | InChI=1S/C12H7N3O/c16-12-11(14-12)7-2-1-5-15-9-3-4-13-8(9)6-10(7)15/h1-6,13H                             |
| <b>r1-32</b>  |  | 18.4483 | 242.8025 | -13.6118 | 47.2087  | 319.5661 | InChI=1S/C12H7N3O/c16-8-3-1-2-7-4-5-13-11(7)14-12-10-9(6-8)15(10)12/h1-6H, 11, 13, 14)/b3-1-, 7-2-, 9-6- |
| <b>E-46</b>   |  | 14.6171 | 146.549  | -10.8119 | 135.8597 | 319.7265 | InChI=1S/C12H7N3O/c16-12-8-2-1-3-9(14-15-6-10(8)15)7-4-5-13-11(7)12/h1-6,13H/b3-1-, 8-2-, 9-6-           |
| <b>X-48</b>   |  | 20.4304 | 225.4575 | -8.0750  | 55.8505  | 319.7574 | InChI=1S/C12H7N3O/c16-9-6-7-2-1-4-14-12-11(15(9)12)10-8(7)3-5-13-10/h1-6,13H/b2-1-, 14-4-                |
| <b>A-41</b>   |  | 27.4174 | 235.6397 | -10.6258 | 55.6913  | 319.7926 | InChI=1S/C12H7N3O/c16-11-8-6-14-12-7(3-4-13-12)9-2-1-5-15(9)10(8)11/h1-6,13H/b14-6-                      |
| <b>H11-92</b> |  | 6.8026  | 143.8225 | -2.8103  | 151.6169 | 319.9262 | InChI=1S/C12H7N3O/c16-12-9-3-1-2-7-6-10(14-7)15(12)11-8(9)4-5-13-11/h1-6,13H/b2-1-, 9-3-                 |
| <b>H11-15</b> |  | 11.5506 | 263.256  | -0.8694  | 21.2869  | 320.1346 | InChI=1S/C12H7N3O/c16-12-10-3-1-2-7-8-4-5-13-11(8)9(7)6-15(12)14-10/h1-6,13H/b3-1-, 7-2-, 9-6-           |
| <b>X-30</b>   |  | 5.7308  | 191.2725 | -3.7435  | 100.8806 | 320.1388 | InChI=1S/C12H7N3O/c16-9-6-7-2-1-4-14-15-11(9)12(15)10-8(7)3-5-13-10/h1-6,13H/b2-1-, 14-4-                |
| <b>A-9</b>    |  | 10.1036 | 123.629  | -2.5861  | 159.0908 | 320.1731 | InChI=1S/C12H7N3O/c16-9-6-14-10-7-2-1-5-15(11(9)10)12-8(7)3-4-13-12/h1-6,13H                             |
| <b>r-11</b>   |  | 9.7513  | 260.2814 | -4.9889  | 29.6158  | 320.2472 | InChI=1S/C12H7N3O/c16-11-8-6-15-9(10(11)15)3-1-2-7-4-5-13-12(7)14-8/h1-6H, 11, 13, 14)/b3-1-, 7-2-       |
| <b>H-123</b>  |  | 19.257  | 228.1598 | -12.0637 | 81.2697  | 321.2139 | InChI=1S/C12H7N3O/c16-12-10-6-7(15(12)14-10)2-1-3-8-9-4-5-13-11(8)9/h1-6,13H/b2-1-, 8-3-                 |
| <b>H1-132</b> |  | 24.8723 | 153.6644 | -7.3158  | 127.5475 | 321.2518 | InChI=1S/C12H7N3O/c16-10-3-1-2-7-8-4-5-13-12(8)15-11(14-15)6-9(7)10/h1-6,13H                             |
| <b>F-60</b>   |  | 19.4982 | 145.9334 | -12.2227 | 125.9493 | 321.5251 | InChI=1S/C12H7N3O/c16-12-8-2-1-3-9(15-6-10(8)15)7-4-5-13-11(7)14-12/h1-6H, 11, 13, 14, 16)               |
| <b>x6-29</b>  |  | 23.9086 | 211.226  | -14.5201 | 91.6976  | 321.615  | InChI=1S/C12H7N3O/c16-10-3-1-2-7-4-5-13-8(7)6-9-11-12(14-9)15(10)11/h1-6,13H/b3-1-, 7-2-, 8-6-           |
| <b>E-28</b>   |  | 7.3988  | 96.5711  | -3.8492  | 188.6252 | 322.108  | InChI=1S/C12H7N3O/c16-12-9-6-15(12)10-3-1-2-8(14-9)7-4-5-13-11(7)10/h1-6,13H/b14-8-                      |
| <b>r-41</b>   |  | 16.1938 | 221.0346 | -9.957   | 88.9855  | 322.146  | InChI=1S/C12H7N3O/c16-12-10-8-3-1-2-7-4-5-13-11(7)14-6-9(8)15(10)12/h1-6H, 11, 13, 14)/b3-1-, 7-2-, 9-6- |
| <b>o-94</b>   |  | 21.8996 | 201.629  | -12.7759 | 88.5456  | 322.1473 | InChI=1S/C12H7N3O/c16-12-11-10-9(3-4-13-10)15(12)5-1-2-7-6-8(7)14-11/h1-6,13H/b5-1-, 7-2-, 14-11-        |
| <b>H-27</b>   |  | 5.9223  | 122.0041 | -2.1837  | 164.9335 | 322.1898 | InChI=1S/C12H7N3O/c16-12-7-2-1-3-9-8-4-5-13-10(8)11(14-6-7)15(9)12/h1-6,13H                              |
| <b>H1-117</b> |  | 3.4496  | 314.6995 | -2.1369  | -4.97    | 322.2114 | InChI=1S/C12H7N3O/c16-7-2-1-3-9-8-4-5-13-11(8)14-12-10(6-7)15(9)12/h1-6,13H/b2-1-, 9-3-, 10-6-           |

|               |  |          |           |           |           |           |                                                                                                                            |
|---------------|--|----------|-----------|-----------|-----------|-----------|----------------------------------------------------------------------------------------------------------------------------|
| <b>x8-42</b>  |  | 11, 6931 | 232, 5301 | -8, 1839  | 59, 9533  | 322, 2381 | InChI=1S/C12H7N3O/c16-10-3-1-2-7-4-5-13-11(7)14-12-9-6-8(10)15(9)12/h1-6H, (H, 13, 14)/b3-1+, 7-2-                         |
| <b>o-60</b>   |  | 10, 2032 | 83, 4459  | -1, 4717  | 186, 9894 | 322, 3706 | InChI=1S/C12H7N3O/c16-12-10-7-2-1-5-15(9)(7)6-14-10)8-3-4-13-11(8)12/h1-6, 13H                                             |
| <b>H1-4</b>   |  | 23, 0032 | 229, 2796 | -10, 8701 | 60, 4065  | 322, 6853 | InChI=1S/C12H7N3O/c16-10-3-1-2-7-8-4-5-13-11(8)12(7)14-9-6-15(9)10/h1-6, 13H/b3-1-, 7-2-, 14-12+                           |
| <b>q-23</b>   |  | 9, 0954  | 146, 3492 | -3, 7305  | 128, 4647 | 322, 8845 | InChI=1S/C12H7N3O/c16-12-11-9-3-1-2-7-4-5-13-10(7)8(14-11)6-15(9)12/h1-6, 13H/b2-1-, 9-3-                                  |
| <b>G-21</b>   |  | 7, 2744  | 110, 2844 | -5, 6755  | 184, 311  | 322, 8981 | InChI=1S/C12H7N3O/c16-12-9-3-1-2-7(10-6-14-15(10)12)8-4-5-13-11(8)9/h1-6, 13H                                              |
| <b>X-49</b>   |  | 18, 3921 | 206, 7738 | -7, 2790  | 74, 8771  | 322, 9435 | InChI=1S/C12H7N3O/c16-9-6-7-2-1-4-14-12-11(15(9)12)10-8(7)3-5-13-10/h1-6, 13H/b2-1-, 14-4+                                 |
| <b>X22-51</b> |  | 5, 2454  | 103, 8589 | -4, 5579  | 198, 9348 | 323, 0094 | InChI=1S/C12H7N3O/c16-11-9-6-7-2-1-4-13-8-3-5-14-12(8)15(9)10(7)11/h1-6, 14H/b2-1-, 13-4-                                  |
| <b>j-2</b>    |  | 43, 849  | 183, 4522 | -19, 6747 | 105, 5004 | 323, 0448 | InChI=1S/C12H7N3O/c16-12-10-9-2-1-4-13-7-3-5-14-8(7)6-15(9)11(10)12/h1-6, 14H/b4-1-, 8-6+, 9-2-, 13-7+                     |
| <b>G-7</b>    |  | 7, 1878  | 111, 0751 | -2, 2408  | 179, 4143 | 323, 1684 | InChI=1S/C12H7N3O/c16-11-9-3-1-2-7-8-4-5-13-12(8)14-6-15(9)10(7)11/h1-6, 13H                                               |
| <b>j-16</b>   |  | 34, 9177 | 176, 2139 | -11, 6661 | 102, 2709 | 323, 1887 | InChI=1S/C12H7N3O/c16-12-11-9-2-1-4-13-7-3-5-14-8(7)6-10(11)15(9)12/h1-6, 14H/b2-1-, 4-1-, 8-6+, 9-2-, 10-6+, 13-4-, 13-7- |
| <b>H1-70</b>  |  | 5, 8149  | 109, 6856 | -1, 8814  | 179, 8445 | 323, 3168 | InChI=1S/C12H7N3O/c16-10-3-1-2-7-8-4-5-13-11(8)12-14-6-9(7)15(10)12/h1-6, 13H                                              |
| <b>x8-33</b>  |  | 30, 6646 | 246, 8901 | -15, 9943 | 44, 9422  | 323, 5791 | InChI=1S/C12H7N3O/c16-9-3-1-2-7-4-5-13-12(7)14-6-8-10-11(9)15(8)10/h1-6H, (H, 13, 14)/b3-1-, 7-2-, 8-6-                    |
| <b>r1-21</b>  |  | 17, 042  | 248, 406  | -12, 8016 | 49, 6107  | 323, 7516 | InChI=1S/C12H7N3O/c16-9-3-1-2-7-4-5-13-12(7)14-6-8-10-11(9)15(8)10/h1-6H, (H, 13, 14)/b3-1-, 7-2-, 8-6+                    |
| <b>H-115</b>  |  | 19, 4701 | 229, 9522 | -12, 1241 | 80, 9088  | 323, 8598 | InChI=1S/C12H7N3O/c16-12-10-7(6-15(12)14-10)2-1-3-8-9-4-5-13-11(8)9/h1-6, 13H/b2-1-, 8-3-                                  |
| <b>G-5</b>    |  | 6, 7184  | 33, 5261  | -1, 9776  | 238, 8266 | 323, 9794 | InChI=1S/C12H7N3O/c16-11-9-6-14-15-10(11)3-1-2-7(9)8-4-5-13-12(8)15/h1-6, 13H                                              |
| <b>x3-19</b>  |  | 17, 7343 | 221, 0329 | -9, 3046  | 51, 7688  | 324, 1335 | InChI=1S/C12H7N3O/c16-12-9-7-6-15(5-1-3-13-10(7)9)8-2-4-14-11(8)12/h1-6, 14H/b5-1-, 13-3-                                  |
| <b>q1-13</b>  |  | 13, 6833 | 101, 3802 | -7, 5023  | 186, 2112 | 324, 2038 | InChI=1S/C12H7N3O/c16-12-10-7(4-5-13-10)2-1-3-9-8-6-15(9)14-11(8)12/h1-6, 13H/b2-1-, 9-3+                                  |
| <b>B-261</b>  |  | 11, 5541 | 185, 1853 | -8, 6438  | 103, 4119 | 324, 2391 | InChI=1S/C12H7N3O/c16-12-8-2-1-5-15-6-9(15)14-11(12)10-7(8)3-4-13-10/h1-6, 13H/b5-1-, 8-2-, 14-11-                         |
| <b>C-52</b>   |  | 11, 9271 | 120, 1919 | -5, 3248  | 175, 5246 | 324, 2574 | InChI=1S/C12H7N3O/c16-12-10-7-2-1-4-13-6-9(10)15(12)11-8(7)3-5-14-11/h1-6, 14H/b2-1-, 4-1-, 7-2-, 9-6-, 13-4?, 13-6?       |

|                |                                                                                     |         |          |          |          |          |                                                                                                    |
|----------------|-------------------------------------------------------------------------------------|---------|----------|----------|----------|----------|----------------------------------------------------------------------------------------------------|
| <b>A-151</b>   |    | 28.1914 | 208.0815 | -10.9522 | 72.0548  | 324.5239 | InChI=1S/C12H7N3O/c16-12-10-8-2-1-5-15(11)(10)12)14-6-9-7(8)3-4-13-9/h1-6,13H/b14-6-               |
|                | $C_{12}H_7N_3O$                                                                     |         |          |          |          |          |                                                                                                    |
| <b>H-45</b>    |    | 16.5552 | 228.1068 | -6.7528  | 59.958   | 324.9105 | InChI=1S/C12H7N3O/c16-12-10-7-6-8(7)13-3-1-5-15(12)9-2-4-14-11(9)10/h1-6,14H/b5-1-,10-7-,13-3+     |
|                | $C_{12}H_7N_3O$                                                                     |         |          |          |          |          |                                                                                                    |
| <b>H-13</b>    |    | 7.5134  | 121.769  | -1.6206  | 163.9985 | 324.9178 | InChI=1S/C12H7N3O/c16-10-7-2-1-3-9-8-4-5-13-11(8)14-12(10)15(9)6-7/h1-6,13H                        |
|                | $C_{12}H_7N_3O$                                                                     |         |          |          |          |          |                                                                                                    |
| <b>o-227</b>   |    | 24.5225 | 166.3196 | -9.1128  | 115.0129 | 324.9256 | InChI=1S/C12H7N3O/c16-10-6-9-11-7(14-11)2-1-5-15(9)8-3-4-13-12(8)10/h1-6,13H                       |
|                | $C_{12}H_7N_3O$                                                                     |         |          |          |          |          |                                                                                                    |
| <b>x4-14</b>   |    | 28.8571 | 239.6461 | -16.4459 | 55.8546  | 325.044  | InChI=1S/C12H7N3O/c16-12-9-10-7(4-5-13-10)2-1-3-8-14-6-15(8)11(9)12/h1-6,13H/b2-1-,8-3-            |
|                | $C_{12}H_7N_3O$                                                                     |         |          |          |          |          |                                                                                                    |
| <b>A2-39</b>   |    | 20.6112 | 203.2816 | -7.6498  | 90.225   | 325.1266 | InChI=1S/C12H7N3O/c16-12-10-6-9-7(2-1-4-13-9)8-3-5-14-11(8)15(10)12/h1-6,14H                       |
|                | $C_{12}H_7N_3O$                                                                     |         |          |          |          |          |                                                                                                    |
| <b>F-46</b>    |    | 12.1969 | 171.3321 | -8.4357  | 118.9971 | 325.1852 | InChI=1S/C12H7N3O/c16-11-7-2-1-3-9(11)10-6-15(10)14-12-8(7)4-5-13-12/h1-6H, (H,13,14)/b8-7-        |
|                | $C_{12}H_7N_3O$                                                                     |         |          |          |          |          |                                                                                                    |
| <b>j-12</b>    |    | 16.1788 | 251.3693 | -12.7943 | 48.9753  | 325.3577 | InChI=1S/C12H7N3O/c16-10-6-8-7(3-5-14-8)13-4-1-2-9-11-12(10)15(9)11/h1-6,14H/b4-1-,8-6+,9-2-,13-7- |
|                | $C_{12}H_7N_3O$                                                                     |         |          |          |          |          |                                                                                                    |
| <b>A-171</b>   |   | 8.1382  | 184.821  | -5.6108  | 105.8705 | 325.3578 | InChI=1S/C12H7N3O/c16-11-9-8(3-4-13-9)7-2-1-5-15-10(11)12(15)14-6-7/h1-6,13H/b5-1-,7-2-,14-6-      |
|                | $C_{12}H_7N_3O$                                                                     |         |          |          |          |          |                                                                                                    |
| <b>r-21</b>    |  | 14.6329 | 215.965  | -6.6379  | 95.3195  | 325.4156 | InChI=1S/C12H7N3O/c16-12-9-6-8-3-1-2-7-4-5-13-10(7)14-11(8)15(9)12/h1-6H, (H,13,14)                |
|                | $C_{12}H_7N_3O$                                                                     |         |          |          |          |          |                                                                                                    |
| <b>H11-134</b> |  | 42.2807 | 270.6401 | -17.5813 | 16.0664  | 325.4455 | InChI=1S/C12H7N3O/c16-11-6-8(11)9-2-1-3-10-7-4-5-13-12(7)15(10)14-9/h1-6,13H                       |
|                | $C_{12}H_7N_3O$                                                                     |         |          |          |          |          |                                                                                                    |
| <b>H11-125</b> |  | 16.4648 | 144.5879 | -11.662  | 131.6228 | 325.4553 | InChI=1S/C12H7N3O/c16-12-9-3-1-2-7(10-6-15(10)14-9)8-4-5-13-11(8)12/h1-6,13H/b3-1-,7-2-,14-9-      |
|                | $C_{12}H_7N_3O$                                                                     |         |          |          |          |          |                                                                                                    |
| <b>X23-14</b>  |  | 35.1847 | 178.0543 | -11.384  | 118.2383 | 325.4594 | InChI=1S/C12H7N3O/c16-12-10-7-2-1-4-13-8-3-5-14-11(8)15(12)9(10)6-7/h1-6,14H/b2-1-,13-4-           |
|                | $C_{12}H_7N_3O$                                                                     |         |          |          |          |          |                                                                                                    |
| <b>o-207</b>   |  | 8.1708  | 111.2585 | -1.3792  | 170.7013 | 325.5857 | InChI=1S/C12H7N3O/c16-12-8-6-7-2-1-5-15(12)9-3-4-13-11(9)10(8)14-7/h1-6,13H/b5-1-,7-2-             |
|                | $C_{12}H_7N_3O$                                                                     |         |          |          |          |          |                                                                                                    |
| <b>o-15</b>    |  | 11.3896 | 146.0053 | -3.1998  | 138.6949 | 325.6652 | InChI=1S/C12H7N3O/c16-12-7-2-1-5-15-9-3-4-13-8(9)6-10(15)11(12)14-7/h1-6,13H/b5-1-,7-2-            |
|                | $C_{12}H_7N_3O$                                                                     |         |          |          |          |          |                                                                                                    |
| <b>G-8</b>     |  | 6.1099  | 34.1798  | -1.9431  | 242.3326 | 325.7278 | InChI=1S/C12H7N3O/c16-11-9-3-1-2-7-8-4-5-13-12(8)15(9)6-14-10(7)11/h1-6,13H                        |
|                | $C_{12}H_7N_3O$                                                                     |         |          |          |          |          |                                                                                                    |
| <b>o-61</b>    |  | 5.3564  | 65.0881  | -1.9593  | 219.5756 | 325.8005 | InChI=1S/C12H7N3O/c16-12-10-7-2-1-5-15(6-8(7)14-10)9-3-4-13-11(9)12/h1-6,13H                       |
|                | $C_{12}H_7N_3O$                                                                     |         |          |          |          |          |                                                                                                    |
| <b>H11-112</b> |  | 19.3263 | 170.7741 | -11.382  | 105.2929 | 325.8254 | InChI=1S/C12H7N3O/c16-12-8-2-1-3-9(14-12)10-6-15(10)11-7(8)4-5-13-11/h1-6,13H                      |
|                | $C_{12}H_7N_3O$                                                                     |         |          |          |          |          |                                                                                                    |
| <b>x2-2</b>    |  | 44.6647 | 170.9174 | -19.846  | 112.1233 | 325.8786 | InChI=1S/C12H7N3O/c16-12-10-9-6-8-7(2-4-14-8)13-3-1-5-15(9)11(10)12/h1-6,14H/b5-1-,9-6-,13-3+      |
|                | $C_{12}H_7N_3O$                                                                     |         |          |          |          |          |                                                                                                    |

|               |                                                                                     |          |           |           |           |           |                                                                                                                            |
|---------------|-------------------------------------------------------------------------------------|----------|-----------|-----------|-----------|-----------|----------------------------------------------------------------------------------------------------------------------------|
| <b>E-12</b>   |    | 9, 2618  | 74, 2055  | -3, 5044  | 206, 8067 | 325, 9341 | InChI=1S/C12H7N3O/c16-11-9-3-1-2-8-7-4-5-13-12(7)15(9)10(11)6-14-8/h1-6, 13H/b2-1-, 9-3-                                   |
| <b>q-14</b>   |    | 8, 1924  | 141, 9647 | -2, 7498  | 150, 3899 | 325, 9495 | InChI=1S/C12H7N3O/c16-11-9-3-1-2-7-4-5-13-10(7)8-6-15(9)12(11)14-8/h1-6, 13H/b2-1-, 9-3-                                   |
| <b>H-163</b>  |    | 23, 503  | 237, 7916 | -10, 716  | 50, 8736  | 326, 2605 | InChI=1S/C12H7N3O/c16-12-14-11-8(9-4-5-13-10(9)11)3-1-2-7-6-15(7)12/h1-6, 13H/b2-1-, 8-3-, 14-11+                          |
| <b>X22-15</b> |    | 11, 2117 | 275, 7946 | -7, 5539  | 31, 8228  | 326, 283  | InChI=1S/C12H7N3O/c16-12-7-6-9-8(3-5-14-9)13-4-1-2-10-11(7)15(10)12/h1-6, 14H/b2-1-, 4-1-, 7-6+, 9-6+, 10-2+, 13-4-, 13-8- |
| <b>E-9</b>    |    | 5, 6676  | 32, 6603  | -1, 488   | 253, 2698 | 326, 3254 | InChI=1S/C12H7N3O/c16-11-9-6-15-10(11)3-1-2-8(14-9)7-4-5-13-12(7)15/h1-6, 13H/b2-1-, 10-3-                                 |
| <b>x4-37</b>  |    | 13, 419  | 231, 0312 | -5, 0512  | 73, 1905  | 326, 4661 | InChI=1S/C12H7N3O/c16-12-11-9-8(6-14-15(11)12)3-1-2-7-4-5-13-10(7)9/h1-6, 13H                                              |
| <b>H11-34</b> |    | 6, 402   | 104, 3469 | -2, 3727  | 176, 2397 | 326, 5063 | InChI=1S/C12H7N3O/c16-12-10-6-7-2-1-3-8(10)9-4-5-13-11(9)15(12)14-7/h1-6, 13H                                              |
| <b>G1-85</b>  |    | 20, 3665 | 192, 0836 | -8, 7673  | 69, 7877  | 326, 5209 | InChI=1S/C12H7N3O/c16-9-3-1-2-8-7-4-5-13-10(7)12-11(9)15(12)6-14-8/h1-6, 13H/b3-1-, 8-2-                                   |
| <b>H-42</b>   |    | 8, 1063  | 125, 9041 | -1, 8084  | 164, 0574 | 326, 5657 | InChI=1S/C12H7N3O/c16-10-6-7-2-1-3-9-8-4-5-13-11(8)15(7)12(10)14-9/h1-6, 13H/b2-1-, 9-3-                                   |
| <b>H11-26</b> |   | 30, 7559 | 226, 4123 | -3, 1898  | 60, 7433  | 326, 821  | InChI=1S/C12H7N3O/c16-12-9-6-10-8(4-5-13-10)7(9)2-1-3-11-14-15(11)12/h1-6, 13H/b3-1-, 7-2-                                 |
| <b>n-172</b>  |  | 9, 5084  | 83, 932   | -3, 139   | 205, 0707 | 326, 9305 | InChI=1S/C12H7N3O/c16-12-7-2-1-5-15-6-14-10(7)9(12)11-8(15)3-4-13-11/h1-6, 13H/b5-1-, 7-2+                                 |
| <b>B-217</b>  |  | 5, 9470  | 36, 5117  | -1, 7935  | 246, 7211 | 326, 9660 | InChI=1S/C12H7N3O/c16-12-9-6-15-5-1-2-7(11(12)14-15)8-3-4-13-10(8)9/h1-6, 13H                                              |
| <b>H11-40</b> |  | 19, 0493 | 227, 477  | -11, 769  | 89, 5236  | 327, 1579 | InChI=1S/C12H7N3O/c16-12-9-6-15(12)10(14-9)3-1-2-7-8-4-5-13-11(7)8/h1-6, 13H/b3-1-, 7-2-                                   |
| <b>H1-45</b>  |  | 12, 4953 | 221, 744  | -6, 8788  | 71, 3658  | 327, 1913 | InChI=1S/C12H7N3O/c16-11-3-1-2-8-7-4-5-13-9(7)6-10(8)15-12(11)14-15/h1-6, 13H/b3-1-, 8-2-                                  |
| <b>G1-102</b> |  | 17, 2769 | 258, 4896 | -7, 9662  | 25, 5658  | 327, 271  | InChI=1S/C12H7N3O/c16-10-3-1-2-9-7-4-5-13-8(7)6-14-12-11(10)15(9)12/h1-6, 13H                                              |
| <b>x5-46</b>  |  | 21, 2722 | 254, 0267 | -11, 7759 | 37, 9909  | 327, 3277 | InChI=1S/C12H7N3O/c16-12-10-9-8(6-15(9)10)3-1-2-7-4-5-13-11(7)14-12/h1-6H, 0L, 13, 14, 16) /b3-1-, 7-2-                    |
| <b>o-72</b>   |  | 9, 6465  | 85, 3861  | -1, 3028  | 190, 7921 | 327, 566  | InChI=1S/C12H7N3O/c16-10-6-9-7-2-1-5-15(9)8-3-4-13-12(8)14-11(7)10/h1-6, 13H                                               |
| <b>B-249</b>  |  | 12, 1788 | 185, 5793 | -8, 0506  | 105, 6709 | 327, 5795 | InChI=1S/C12H7N3O/c16-11-7-2-1-5-15-6-9(15)10(11)14-12-8(7)3-4-13-12/h1-6, 13H/b5-1-, 7-2-                                 |
| <b>x4-12</b>  |  | 28, 843  | 239, 7963 | -16, 5141 | 54, 2626  | 327, 6644 | InChI=1S/C12H7N3O/c16-12-9-10-7(4-5-13-10)2-1-3-8-6-14-15(8)11(9)12/h1-6, 13H/b2-1-, 8-3-                                  |

|                |                                                                                     |          |           |           |           |           |                                                                                                                |
|----------------|-------------------------------------------------------------------------------------|----------|-----------|-----------|-----------|-----------|----------------------------------------------------------------------------------------------------------------|
| <b>C-70</b>    |    | 15, 4224 | 229, 9853 | -8, 2708  | 69, 6491  | 327, 7104 | InChI=1S/C12H7N3O/c16-12-14-4-1-2-7-8-3-5-13-11(8)15(12)10-6-9(7)10/h1-6, 13H/b2-1-, 14-4+                     |
| <b>H1-74</b>   |    | 10, 2011 | 161, 177  | -4, 0584  | 137, 0456 | 327, 9363 | InChI=1S/C12H7N3O/c16-10-3-1-2-7-6-9-14-12(15(9)10)-11-8(7)4-5-13-11/h1-6, 13H/b3-1-, 7-2+                     |
| <b>J-6</b>     |    | 19, 2812 | 186, 7255 | -11, 9631 | 105, 5102 | 328, 1127 | InChI=1S/C12H7N3O/c16-12-7-2-1-4-13-8-3-5-14-9(8)6-15-10(7)11(12)15/h1-6, 14H/b4-1-, 7-2+, 9-6+, 13-8-         |
| <b>H11-160</b> |    | 14, 8974 | 277, 8875 | -10, 9147 | 37, 22    | 328, 2241 | InChI=1S/C12H7N3O/c16-12-8(7-4-5-13-11(7)12)2-1-3-9-10-6-15(10)14-9/h1-6, 13H/b3-1-, 8-2-                      |
| <b>x5-37</b>   |    | 27, 1838 | 291, 4628 | -17, 2036 | 15, 7491  | 328, 4594 | InChI=1S/C12H7N3O/c16-12-10-9(15(10)12)6-8-3-1-2-7-4-5-13-11(7)14-8/h1-6H, (H, 13, 14)/b8-6+                   |
| <b>H1-14</b>   |    | 5, 1122  | 102, 3543 | -1, 7656  | 192, 1384 | 328, 6005 | InChI=1S/C12H7N3O/c16-11-3-1-2-7-8-4-5-13-12(8)15-10(11)6-9(7)14-15/h1-6, 13H/b3-1-, 7-2-                      |
| <b>q1-24</b>   |    | 15, 515  | 162, 4007 | -5, 1711  | 140, 3574 | 328, 7814 | InChI=1S/C12H7N3O/c16-12-10-7(4-5-13-10)2-1-3-8-6-9-11(14-9)15(8)12/h1-6, 13H/b2-1-, 8-3-                      |
| <b>r-43</b>    |    | 14, 0148 | 219, 797  | -6, 4437  | 96, 359   | 328, 7999 | InChI=1S/C12H7N3O/c16-12-10-8-3-1-2-7-4-5-13-11(7)14-9(8)6-15(10)12/h1-6H, (H, 13, 14)/b3-1-, 7-2-             |
| <b>o-19</b>    |    | 5, 3063  | 38, 6774  | -1, 5446  | 251, 8438 | 328, 8518 | InChI=1S/C12H7N3O/c16-12-7-2-1-5-15-10-3-4-13-11(10)8(7)6-9(12)14-15/h1-6, 13H/b5-1-, 7-2+                     |
| <b>o-85</b>    |   | 6, 0951  | 27, 3608  | -2, 4223  | 256, 3581 | 329, 0251 | InChI=1S/C12H7N3O/c16-10-6-7-8-2-1-5-15(12(10)14-8)9-3-4-13-11(7)9/h1-6, 13H                                   |
| <b>G-27</b>    |  | 24, 4014 | 201, 9059 | -10, 4277 | 95, 783   | 329, 2019 | InChI=1S/C12H7N3O/c16-12-9-3-1-2-7-8-4-5-13-11(8)14-6-10(7)15(9)12/h1-6H, (H, 13, 14)                          |
| <b>q1-47</b>   |  | 25, 8758 | 160, 9622 | -9, 2859  | 126, 9452 | 329, 2413 | InChI=1S/C12H7N3O/c16-10-6-9-8(12-14-15(9)12)3-1-2-7-4-5-13-11(7)10/h1-6, 13H/b2-1-, 8-3+, 9-6+                |
| <b>x6-19</b>   |  | 25, 1396 | 130, 4511 | -18, 0599 | 162, 6484 | 329, 2563 | InChI=1S/C12H7N3O/c16-10-3-1-2-7-4-5-13-9(7)6-8(10)11-12-14-15(11)12/h1-6, 13H/b3-1-, 7-2-, 9-6+, 11-8+        |
| <b>x6-28</b>   |  | 25, 1398 | 130, 4462 | -18, 0624 | 162, 6538 | 329, 2563 | InChI=1S/C12H7N3O/c16-10-3-1-2-7-4-5-13-9(7)6-8(10)11-12-14-15(11)12/h1-6, 13H/b3-1-, 7-2-, 9-6+, 11-8-        |
| <b>D-12</b>    |  | 6, 3423  | 186, 5784 | -1, 2905  | 115, 3382 | 329, 3851 | InChI=1S/C12H7N3O/c16-12-8-6-10-11-7(3-5-14-11)9(15(10)12)2-1-4-13-8/h1-6, 14H/b2-1-, 4-1-, 9-2-, 13-4-, 13-8- |
| <b>B-149</b>   |  | 7, 9676  | 47, 8663  | -3, 0484  | 244, 2945 | 329, 4064 | InChI=1S/C12H7N3O/c16-12-11-8-2-1-5-15(12(10(14-11)6-9-7(8)3-4-13-9/h1-6, 13H                                  |
| <b>A2-52</b>   |  | 22, 2939 | 297, 6044 | -16, 8012 | 18, 3984  | 329, 4496 | InChI=1S/C12H7N3O/c16-11-8(7-3-5-13-10(7)11)2-1-4-14-12-9-6-15(9)12/h1-6, 13H/b4-1-, 8-2-, 14-12+              |
| <b>n-39</b>    |  | 32, 1661 | 235, 7711 | -14, 0655 | 58, 758   | 329, 5284 | InChI=1S/C12H7N3O/c16-11-7-6-14-12-9(3-4-13-12)15-5-1-2-8(15)10(7)11/h1-6, 13H/b14-6+                          |
| <b>B-245</b>   |  | 22, 7354 | 214, 2626 | -11, 1336 | 96, 2573  | 329, 8089 | InChI=1S/C12H7N3O/c16-11-8(7-3-4-13-10(7)11)2-1-5-15-6-9-12(15)14-9/h1-6, 13H/b5-1-, 8-2-                      |

|               |                                                                                     |         |          |          |          |          |                                                                                                |
|---------------|-------------------------------------------------------------------------------------|---------|----------|----------|----------|----------|------------------------------------------------------------------------------------------------|
| <b>G-80</b>   |    | 20.8215 | 184.3881 | -10.7917 | 116.717  | 329.9656 | InChI=1S/C12H7N3O/c16-12-14-6-9-7(4-5-13-9)8-2-1-3-10-11(8)15(10)12/h1-6,13H/b14-6+            |
| <b>X-38</b>   |    | 27.2207 | 299.0374 | -17.4719 | 15.2944  | 330.1413 | InChI=1S/C12H7N3O/c16-12-10-9(15(10)12)6-7-2-1-4-13-11(8)7(3-5-14-11)/h1-6,14H                 |
| <b>q1-25</b>  |    | 3.8077  | 320.7917 | -3.8746  | -6.9     | 330.3065 | InChI=1S/C12H7N3O/c16-11-9(15-6-8-12(15)14-8)3-1-2-7-4-5-13-10(7)11/h1-6,13H                   |
| <b>B-222</b>  |    | 6.9967  | 25.6906  | -2.5947  | 252.3510 | 330.3711 | InChI=1S/C12H7N3O/c16-12-9-6-15-5-1-2-7(9)8-3-4-13-10(8)11(15)14-12/h1-6,13H                   |
| <b>H1-86</b>  |    | 29.2675 | 232.3062 | -14.6918 | 54.3331  | 330.5339 | InChI=1S/C12H7N3O/c16-11-3-1-2-9-7-4-5-13-12(7)15(9)10-6-8(10)14-11/h1-6,13H/b3-1-,9-2-,14-8-  |
| <b>H11-58</b> |    | 19.5947 | 247.5686 | -12.2697 | 67.4285  | 330.604  | InChI=1S/C12H7N3O/c16-11-6-10-9(14-5-10(11)3-1-2-7-8-4-5-13-12(7)8)/h1-6,13H/b3-1-,7-2-        |
| <b>H1-52</b>  |    | 6.097   | 110.2737 | -2.5903  | 185.4815 | 330.8791 | InChI=1S/C12H7N3O/c16-10-3-1-2-9-7-4-5-13-11(7)8-6-15(9)12(10)14-8/h1-6,13H                    |
| <b>B-234</b>  |    | 9.1254  | 116.6030 | -1.7667  | 178.0672 | 331.1962 | InChI=1S/C12H7N3O/c16-12-11-8-6-15(12)5-1-2-9(14-11)7-3-4-13-10(7)8/h1-6,13H/b5-1-,9-2-        |
| <b>xS-42</b>  |    | 14.0647 | 223.2202 | -6.5934  | 94.1026  | 331.2831 | InChI=1S/C12H7N3O/c16-12-10-9-8(6-15(10)12)3-1-2-7-4-5-13-11(7)14-9/h1-6H,(H,13,14)/b3-1-,7-2- |
| <b>F-70</b>   |   | 10.4757 | 201.8327 | -7.0701  | 100.2318 | 331.2863 | InChI=1S/C12H7N3O/c16-12-14-11-8(4-5-13-11)7-2-1-3-9-10(6-7)15(9)12/h1-6H,(H,13,14,16)/b8-7-   |
| <b>p1-40</b>  |  | 4.254   | 321.4149 | -3.7151  | -5.8399  | 331.3219 | InChI=1S/C12H7N3O/c16-9-3-1-2-7-4-5-13-10(7)11(9)15-6-8-12(15)14-8/h1-6,13H                    |
| <b>A2-6</b>   |  | 22.6442 | 255.5083 | -15.3912 | 59.6908  | 331.3838 | InChI=1S/C12H7N3O/c16-12-9-6-15(12)11(9)14-4-1-2-7-8-3-5-13-10(7)8/h1-6,13H/b4-1-,7-2-,14-11+  |
| <b>r-31</b>   |  | 19.0139 | 203.7369 | -10.9016 | 116.8254 | 331.6135 | InChI=1S/C12H7N3O/c16-12-8-3-1-2-7-4-5-13-11(7)14-6-9-10(8)15(9)12/h1-6H,(H,13,14)             |
| <b>B-109</b>  |  | 3.0749  | 333.9557 | -2.4695  | -6.1700  | 331.6171 | InChI=1S/C12H7N3O/c16-12-8(14-12)6-10-11-7(3-4-13-11)9-2-1-5-15(9)10/h1-6,13H/b10-6+           |
| <b>F-13</b>   |  | 8.1316  | 84.0056  | -2.6531  | 209.865  | 331.625  | InChI=1S/C12H7N3O/c16-11-7-2-1-3-10-9(11)6-15(10)14-12-8(7)4-5-13-12/h1-6H,(H,13,14)/b8-7+     |
| <b>o-79</b>   |  | 16.1713 | 176.2141 | -12.2469 | 126.979  | 331.6479 | InChI=1S/C12H7N3O/c16-10-6-7-8(14-11(7)10)2-1-5-15-9-3-4-13-12(9)15/h1-6,13H/b5-1-,8-2+        |
| <b>o-145</b>  |  | 9.7408  | 80.0743  | -1.7626  | 202.6726 | 331.6808 | InChI=1S/C12H7N3O/c16-10-6-9-11-7(10)2-1-5-15(9)8-3-4-13-12(8)14-11/h1-6,13H                   |
| <b>C-53</b>   |  | 6.4407  | 125.8465 | -3.0804  | 172.2254 | 331.7248 | InChI=1S/C12H7N3O/c16-12-10-7-2-1-4-13-9(10)6-15(12)11-8(7)3-5-14-11/h1-6,14H                  |
| <b>k1-18</b>  |  | 16.8175 | 158.1135 | -11.22   | 147.9749 | 331.7926 | InChI=1S/C12H7N3O/c16-12-7-6-9-11(7)15(9)5-1-3-13-8-2-4-14-10(8)12/h1-6,14H/b5-1-,13-3-        |

|                |                                                                                     |         |          |          |          |          |                                                                                                              |
|----------------|-------------------------------------------------------------------------------------|---------|----------|----------|----------|----------|--------------------------------------------------------------------------------------------------------------|
| <b>p11-24</b>  | 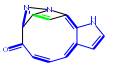   | 10.9482 | 147.4734 | -3.4674  | 143.1155 | 331.9131 | InChI=1S/C12H7N3O/c16-10-3-1-2-7-4-5-13-11(7)8-6-9-12(10)14-15(8)9/h1-6,13H/b3-1-,7-2-,11-8-                 |
| <b>q11-48</b>  |    | 10.0202 | 190.8876 | -5.1363  | 97.5052  | 332.0808 | InChI=1S/C12H7N3O/c16-12-8-3-1-2-7-4-5-13-10(7)11(14-12)9-6-15(8)9/h1-6,13H/b2-1-,8-3+                       |
| <b>H11-139</b> |    | 16.8839 | 190.0491 | -3.7657  | 95.6086  | 332.1529 | InChI=1S/C12H7N3O/c16-12-9-6-15-10(14-15)3-1-2-7(9)8-4-5-13-11(8)12/h1-6,13H/b3-1-,7-2-,9-6+                 |
| <b>o-13</b>    |    | 16.927  | 190.8585 | -8.8846  | 93.8056  | 332.4291 | InChI=1S/C12H7N3O/c16-12-10-2-1-5-15(10)9-3-4-13-7(9)6-8-11(12)14-8/h1-6,13H/b8-6+                           |
| <b>x4-32</b>   |    | 9.878   | 187.6349 | -1.1636  | 107.9719 | 332.4739 | InChI=1S/C12H7N3O/c16-12-8-3-1-2-7-4-5-13-9(7)10-11(12)15(8)6-14-10/h1-6,13H/b2-1-,8-3+                      |
| <b>o-107</b>   |    | 2.901   | 334.5617 | -2.4463  | -6.17    | 332.6181 | InChI=1S/C12H7N3O/c16-12-8(14-12)6-7-9-2-1-5-15(9)10-3-4-13-11(7)10/h1-6,13H/b7-6+                           |
| <b>p-24</b>    |    | 15.463  | 217.275  | -6.2119  | 96.1616  | 332.8611 | InChI=1S/C12H7N3O/c16-12-8-3-1-2-7-4-5-13-9(7)6-10-11(14-8)15(10)12/h1-6,13H/b2-1-,3-1-,7-2-,8-3-,9-6-,10-6+ |
| <b>o-3</b>     |    | 18.2406 | 222.3613 | -9.4373  | 84.4834  | 332.9272 | InChI=1S/C12H7N3O/c16-12-7-2-1-5-15-9-3-4-13-8(9)6-10(15)14-11(7)12/h1-6,13H/b5-1-,7-2-,14-11+               |
| <b>H1-25</b>   |    | 5.0164  | 102.2729 | -2.2529  | 204.1877 | 332.9873 | InChI=1S/C12H7N3O/c16-10-3-1-2-8-7-4-5-13-11(7)9-6-14-12(8)15(9)10/h1-6,13H                                  |
| <b>A-188</b>   |   | 30.1092 | 206.1159 | -11.8249 | 78.2583  | 333.0942 | InChI=1S/C12H7N3O/c16-11-9-7-2-1-5-15(10)9)11)6-14-12-8(7)3-4-13-12/h1-6,13H/b14-6-                          |
| <b>X22-44</b>  |  | 10.4703 | 243.6752 | -7.9162  | 56.9717  | 333.2431 | InChI=1S/C12H7N3O/c16-12-7-6-15-9(11)7)15)2-1-4-13-8-3-5-14-10(8)12/h1-6,14H/b14-6-,13-4-                    |
| <b>x4-43</b>   |  | 16.8683 | 220.0994 | -5.7104  | 88.6999  | 333.322  | InChI=1S/C12H7N3O/c16-12-11-9-8(14-6-15(11)12)3-1-2-7-4-5-13-10(7)9/h1-6,13H                                 |
| <b>q1-5</b>    |  | 11.6463 | 109.3915 | -7.3654  | 192.9686 | 333.4662 | InChI=1S/C12H7N3O/c16-12-8-6-15-9(11)8)14-15)3-1-2-7-4-5-13-10(7)12/h1-6,13H/b2-1-,9-3+                      |
| <b>q1-44</b>   |  | 18.001  | 227.8925 | -12.7477 | 77.8378  | 333.5158 | InChI=1S/C12H7N3O/c16-12-10-7(4-5-13-10)2-1-3-8-11(12)14-9-6-15(8)9/h1-6,13H/b2-1-,8-3+                      |
| <b>G-41</b>    |  | 25.3092 | 164.5878 | -11.5449 | 135.9675 | 333.6094 | InChI=1S/C12H7N3O/c16-12(15-6-14-15)10-7-2-1-3-9(10)11-8(7)4-5-13-11/h1-6,13H                                |
| <b>H11-113</b> |  | 28.17   | 264.4491 | -19.4634 | 41.5302  | 333.6596 | InChI=1S/C12H7N3O/c16-12-9(14-15-6-10(12)15)3-1-2-7-8-4-5-13-11(7)8/h1-6,13H/b3-1-,7-2-                      |
| <b>H11-97</b>  |  | 31.7296 | 272.4363 | 15.0725  | 36.2329  | 333.6722 | InChI=1S/C12H7N3O/c16-12-9-6-15(9)10(14-12)3-1-2-7-8-4-5-13-11(7)8/h1-6,13H/b3-1-,7-2-                       |
| <b>B-242</b>   |  | 13.5278 | 196.6577 | -6.6820  | 87.6995  | 333.8300 | InChI=1S/C12H7N3O/c16-12-10-7(3-4-13-10)9-2-1-5-15(9)6-8-11(12)14-8/h1-6,13H/b8-6+                           |
| <b>B-79</b>    |  | 19.5665 | 194.5424 | -13.1393 | 117.7632 | 334.0500 | InChI=1S/C12H7N3O/c16-12-9-6-10(14-9)15(12)5-1-2-7-8-3-4-13-11(7)8/h1-6,13H/b5-1-,7-2-                       |



|                |                                                                                     |         |          |          |          |          |                                                                                                                            |
|----------------|-------------------------------------------------------------------------------------|---------|----------|----------|----------|----------|----------------------------------------------------------------------------------------------------------------------------|
| <b>F-25</b>    |    | 18.0432 | 281.6491 | -10.3816 | 47.6965  | 334.1887 | InChI=1S/C12H7N3O/c16-12-10-6-7(15(10)12)2-1-3-9-8-4-5-13-11(8)14-9/h1-6H, (H, 13, 14)/b3-1-, 7-2-                         |
| <b>A2-38</b>   |    | 13.7883 | 240.6196 | -9.4275  | 64.3984  | 334.5143 | InChI=1S/C12H7N3O/c16-12-8-2-1-4-13-9-6-10(9)15(12)11-7(8)3-5-14-11/h1-6, 14H/b4-1-, 8-2-, 13-9-                           |
| <b>n-12</b>    |    | 6.4967  | 154.4565 | -3.5067  | 148.8136 | 334.6785 | InChI=1S/C12H7N3O/c16-9-6-14-11(9)12-7-2-1-5-15(12)8-3-4-13-10(7)8/h1-6, 13H/b12-11-                                       |
| <b>X23-4</b>   |    | 7.2476  | 339.466  | -5.0468  | -5.7     | 335.0525 | InChI=1S/C12H7N3O/c16-12-11-9-7(6-15(11)12)2-1-4-13-8-3-5-14-10(8)9/h1-6, 14H/b2-1-, 13-4-                                 |
| <b>X23-21</b>  |    | 7.2457  | 339.4678 | -5.0468  | -5.7     | 335.0525 | InChI=1S/C12H7N3O/c16-12-11-9-7(6-15(11)12)2-1-4-13-8-3-5-14-10(8)9/h1-6, 14H/b2-1-, 13-4+                                 |
| <b>r1-29</b>   |    | 18.8639 | 223.1337 | -11.7074 | 97.9347  | 335.4465 | InChI=1S/C12H7N3O/c16-10-3-1-2-7-4-5-13-12(7)14-8-6-9-11(8)15(9)10/h1-6H, (H, 13, 14)/b3-1-, 7-2-                          |
| <b>o-5</b>     |    | 16.4295 | 178.6009 | -12.2921 | 127.8096 | 335.4469 | InChI=1S/C12H7N3O/c16-11-7(8-6-14-10(8)11)2-1-5-15-9-3-4-13-12(9)15/h1-6, 13H/b5-1-, 7-2+                                  |
| <b>p11-20</b>  |    | 22.7589 | 217.8445 | -13.3048 | 82.3133  | 335.4713 | InChI=1S/C12H7N3O/c16-12-8-3-1-2-7-4-5-13-9(7)6-14-11-10(8)15(11)12/h1-6, 13H/b2-1-, 3-1-, 7-2-, 8-3-, 9-6+, 14-6-, 14-11+ |
| <b>H11-122</b> |   | 11.1866 | 99.7375  | -2.7149  | 175.0327 | 335.5051 | InChI=1S/C12H7N3O/c16-11-6-10-7-2-1-3-9(11)14-15(10)12-8(7)4-5-13-12/h1-6, 13H/b3-1-, 7-2-                                 |
| <b>q-10</b>    |  | 19.4414 | 180.8494 | -2.156   | 113.7445 | 335.5104 | InChI=1S/C12H7N3O/c16-11-8-3-1-2-7-4-5-13-10(7)9(8)6-15-12(11)14-15/h1-6, 13H                                              |
| <b>B-98</b>    |  | 15.8167 | 305.5684 | -13.2833 | 22.6707  | 335.5370 | InChI=1S/C12H7N3O/c16-12-8(7-3-4-13-11(7)12)2-1-5-15-10-6-9(10)14-15/h1-6, 13H/b5-1-, 8-2-                                 |
| <b>A1-42</b>   |  | 17.6926 | 215.6149 | -10.2434 | 77.8047  | 335.6108 | InChI=1S/C12H7N3O/c16-9-6-13-4-1-2-7-8-3-5-14-12(8)15-10(7)11(9)15/h1-6, 14H/b4-1-, 7-2-, 13-6-                            |
| <b>H-66</b>    |  | 18.1452 | 185.7179 | -10.4126 | 102.6894 | 335.6184 | InChI=1S/C12H7N3O/c16-10-8-3-1-2-7-6-15(7)12(10)14-11-9(8)4-5-13-11/h1-6, 13H/b2-1-, 8-3-                                  |
| <b>A2-50</b>   |  | 22.0931 | 202.3427 | -12.5906 | 81.7261  | 335.7968 | InChI=1S/C12H7N3O/c16-11-8-2-1-4-14-12(11)15-6-9(15)10-7(8)3-5-13-10/h1-6, 13H                                             |
| <b>B-257</b>   |  | 8.4961  | 42.0850  | -3.8879  | 239.5820 | 335.8619 | InChI=1S/C12H7N3O/c16-11-10-8(3-4-13-10)7-2-1-5-15-6-9(7)14-12(11)15/h1-6, 13H                                             |
| <b>H-57</b>    |  | 7.3856  | 122.383  | -2.2018  | 173.7937 | 335.9411 | InChI=1S/C12H7N3O/c16-10-6-7-2-1-3-8-9-4-5-13-11(9)15(7)12(8)14-10/h1-6, 13H                                               |
| <b>s11-40</b>  |  | 4.2513  | 102.4648 | -2.7962  | 210.8065 | 336.2329 | InChI=1S/C12H7N3O/c16-12-10-8-6-15(12)9(14-8)3-1-2-7-4-5-13-11(7)10/h1-6, 13H/b3-1-, 7-2-, 11-10-                          |
| <b>o-233</b>   |  | 15.8038 | 311.7954 | -13.5174 | 27.6972  | 336.309  | InChI=1S/C12H7N3O/c16-12-11-10(3-4-13-11)15(12)5-1-2-8-7-6-9(7)14-8/h1-6, 13H/b5-1-, 8-2+                                  |
| <b>o-248</b>   |  | 6.0276  | 90.7349  | -1.4137  | 196.8781 | 336.4234 | InChI=1S/C12H7N3O/c16-10-6-8-7-2-1-5-15(12(7)14-10)9-3-4-13-11(8)9/h1-6, 13H                                               |

|                |  |                    |         |          |          |          |          |                                                                                                                    |
|----------------|--|--------------------|---------|----------|----------|----------|----------|--------------------------------------------------------------------------------------------------------------------|
| <b>p1-16</b>   |  | $C_{22}H_{18}N_2O$ | 27.9003 | 118.2154 | -12.4422 | 165.3428 | 336.4681 | InChI=1S/C12H7N3O/c16-8-3-1-2-7-4-5-13-10(7)12-11-9(6-8)15(12)14-11/h1-6,13H/h3-1-,7-2-,9-6-,12-10+                |
| <b>o-254</b>   |  | $C_{22}H_{18}N_2O$ | 2.0165  | 299.8684 | -1.751   | 35.6676  | 336.5124 | InChI=1S/C12H7N3O/c16-12-14-10-8-6-7(8)2-1-5-15(12)9-3-4-13-11(9)10/h1-6,13H/h5-1-,7-2-                            |
| <b>q11-45</b>  |  | $C_{22}H_{18}N_2O$ | 12.7815 | 209.7689 | -5.8231  | 103.0075 | 336.5238 | InChI=1S/C12H7N3O/c16-12-14-8-6-10-9(15)(10)12(3)-1-2-7-4-5-13-11(7)8/h1-6,13H/h2-1-,9-3+                          |
| <b>s11-53</b>  |  | $C_{22}H_{18}N_2O$ | 11.1238 | 209.9077 | -5.1073  | 105.4582 | 336.7171 | InChI=1S/C12H7N3O/c16-12-14-8-3-1-2-7-4-5-13-10(7)11-9(6-8)15(11)12/h1-6,13H/h3-1-,7-2-,11-10-                     |
| <b>s12-16</b>  |  | $C_{22}H_{18}N_2O$ | 54.8706 | 211.7163 | -32.8787 | 71.295   | 336.8211 | InChI=1S/C12H7N3O/c16-12-10-11(12)15(10)9-3-1-2-7-4-5-13-8(7)6-14-9/h1-6,13H/h2-1-,3-1-,7-2-,8-6+,9-3+,14-6-,14-9+ |
| <b>i-28</b>    |  | $C_{22}H_{18}N_2O$ | 14.7854 | 208.7932 | -6.4856  | 114.8468 | 336.9067 | InChI=1S/C12H7N3O/c16-12-7-2-1-4-13-8-3-5-14-10(8)11-9(6-7)15(11)12/h1-6,14H/h2-1-,4-1-,7-2-,11-10+,13-4-,13-8+    |
| <b>H-60</b>    |  | $C_{22}H_{18}N_2O$ | 26.0085 | 218.0912 | -9.7625  | 96.1033  | 337.3351 | InChI=1S/C12H7N3O/c16-12-9(8-4-5-13-11(8)12)3-1-2-7-6-10-14-15(7)10/h1-6,13H/h2-1-,9-3-                            |
| <b>G-6</b>     |  | $C_{22}H_{18}N_2O$ | 10.0939 | 128.7254 | -3.46    | 160.0812 | 337.4775 | InChI=1S/C12H7N3O/c16-12-10-3-1-2-8-7-4-5-13-9(7)6-14-15(10)11(8)12/h1-6,13H                                       |
| <b>H11-106</b> |  | $C_{22}H_{18}N_2O$ | 10.1817 | 126.4028 | -2.7997  | 167.3055 | 337.918  | InChI=1S/C12H7N3O/c16-11-6-9-7-2-1-3-10(14-11)15(9)12-8(7)4-5-13-12/h1-6,13H                                       |
| <b>x9-1</b>    |  | $C_{22}H_{18}N_2O$ | 35.3336 | 235.4143 | -22.3718 | 71.0153  | 338.154  | InChI=1S/C12H7N3O/c16-9-6-14-15-11-8(12(11)15)3-1-2-7-4-5-13-10(7)9h1-6,13H/h2-1-,8-3-,14-6-                       |
| <b>o-18</b>    |  | $C_{22}H_{18}N_2O$ | 7.7278  | 35.6726  | -2.2317  | 249.6561 | 338.2417 | InChI=1S/C12H7N3O/c16-12-7-2-1-5-15-8-3-4-13-10(8)11(12)14-9(15)6-7/h1-6,13H                                       |
| <b>o-179</b>   |  | $C_{22}H_{18}N_2O$ | 7.858   | 70.9104  | -2.4469  | 224.9587 | 338.3936 | InChI=1S/C12H7N3O/c16-12-8-6-9-7(8)2-1-5-15(14-9)10-3-4-13-11(10)12/h1-6,13H                                       |
| <b>i-99</b>    |  | $C_{22}H_{18}N_2O$ | 25.8483 | 245.7115 | -13.318  | 48.2028  | 338.3965 | InChI=1S/C12H7N3O/c16-12-8-6-7(8)11-10-9(2-4-13-10)15(11)5-1-3-14-12/h1-6,13H/h5-1-,11-7-,14-3+                    |
| <b>E-16</b>    |  | $C_{22}H_{18}N_2O$ | 8.1091  | 72.7688  | -3.2688  | 224.3353 | 338.4704 | InChI=1S/C12H7N3O/c16-12-8-6-15-10(8)3-1-2-9(14-12)7-4-5-13-11(7)15/h1-6,13H/h2-1-,10-3-,14-9+                     |
| <b>B-68</b>    |  | $C_{22}H_{18}N_2O$ | 11.8574 | 109.6420 | -2.7712  | 186.5797 | 338.5070 | InChI=1S/C12H7N3O/c16-12-8-6-10-14-9(2-1-5-15(10)12)7-3-4-13-11(7)8/h1-6,13H                                       |
| <b>C-36</b>    |  | $C_{22}H_{18}N_2O$ | 14.4312 | 92.3847  | -3.8004  | 196.1578 | 338.5475 | InChI=1S/C12H7N3O/c16-10-6-9-11-7(3-5-13-11)8-2-1-4-14-15(9)12(8)10/h1-6,13H                                       |
| <b>H-84</b>    |  | $C_{22}H_{18}N_2O$ | 7.3195  | 44.3855  | -3.0549  | 243.7567 | 338.6053 | InChI=1S/C12H7N3O/c16-12-10-7-2-1-3-9(15(6-7)14-10)8-4-5-13-11(8)12/h1-6,13H                                       |
| <b>B-102</b>   |  | $C_{22}H_{18}N_2O$ | 13.1263 | 221.6240 | -10.6649 | 88.0241  | 338.7482 | InChI=1S/C12H7N3O/c16-12-8-2-1-5-15(12)10-6-9(10)14-11-7(8)3-4-13-11/h1-6,13H/h14-9-                               |
| <b>G-12</b>    |  | $C_{22}H_{18}N_2O$ | 6.7823  | 126.9748 | -1.5787  | 176.1931 | 338.8253 | InChI=1S/C12H7N3O/c16-11-9-3-1-2-8(12-14-6-15(9)12)7-4-5-13-10(7)11/h1-6,13H                                       |

|                |                                                                                     |         |          |          |          |          |                                                                                                                    |
|----------------|-------------------------------------------------------------------------------------|---------|----------|----------|----------|----------|--------------------------------------------------------------------------------------------------------------------|
| <b>A1-19</b>   |    | 17,5665 | 253,4454 | -9,8606  | 32,0108  | 338,8317 | InChI=1S/C12H7N3O/c16-12-10-7(3-5-14-10)8-2-1-4-13-6-9-11(8)15(9)12/h1-6,14H/b2-1-,4-1-,8-2-,9-6+,13-4-,13-6-      |
| <b>H11-109</b> |    | 10,3379 | 203,4154 | -4,026   | 85,4265  | 338,8862 | InChI=1S/C12H7N3O/c16-12-11-8(4-5-13-11)7-2-1-3-10(14-12)15-6-9(7)15/h1-6,13H/b14-10-                              |
| <b>G-52</b>    |    | 5,7939  | 108,1391 | -2,1437  | 193,9557 | 338,9486 | InChI=1S/C12H7N3O/c16-12-10-8-3-1-2-7(6-14-10)15(12)11-9(8)4-5-13-11/h1-6,13H/b2-1-,3-1-,7-2+,8-3-                 |
| <b>s11-4</b>   |    | 22,0201 | 269,3135 | -7,729   | 32,9072  | 338,9592 | InChI=1S/C12H7N3O/c16-12-10-6-8-9(14-15(10)12)3-1-2-7-4-5-13-11(7)8/h1-6,13H                                       |
| <b>H11-104</b> |    | 10,0448 | 191,2616 | -2,4097  | 106,2139 | 338,9683 | InChI=1S/C12H7N3O/c16-12-10-6-7(14-12)2-1-3-9-8-4-5-13-11(8)15(9)10/h1-6,13H/b2-1-,9-3-                            |
| <b>i-12</b>    |    | 16,1725 | 220,287  | -5,893   | 87,2593  | 339,0965 | InChI=1S/C12H7N3O/c16-12-10-6-7-9(15(10)12)2-1-4-13-8-3-5-14-11(7)8/h1-6,14H/b2-1-,4-1-,9-2+,11-7+,13-4-,13-8-     |
| <b>A1-49</b>   |    | 55,5152 | 218,7234 | -29,0852 | 52,3091  | 339,4702 | InChI=1S/C12H7N3O/c16-12-10-11(12)15(10)9-2-1-4-13-6-8-7(9)3-5-14-8/h1-6,14H/b2-1-,4-1-,8-6-,9-2-,9-7+,13-4-,13-6+ |
| <b>o-9</b>     |    | 9,4343  | 111,4506 | -2,7987  | 181,5331 | 339,6004 | InChI=1S/C12H7N3O/c16-12-7-2-1-5-15-9-3-4-13-10(9)8(6-7)11(12)14-15/h1-6,13H/b5-1-,7-2-                            |
| <b>x9-42</b>   |   | 30,3636 | 233,7751 | -23,8712 | 59,1604  | 339,6402 | InChI=1S/C12H7N3O/c16-12-9-8(11(9)15-6-14-15)3-1-2-7-4-5-13-10(7)12/h1-6,13H/b2-1-,8-3+                            |
| <b>i-51</b>    |  | 13,4506 | 120,4575 | -4,6611  | 166,5437 | 339,7146 | InChI=1S/C12H7N3O/c16-12-10-7-6-9(10)15(5-1-3-14-12)8-2-4-13-11(7)8/h1-6,13H/b5-1-,14-3-                           |
| <b>X-34</b>    |  | 27,8730 | 299,1631 | -16,0762 | 16,9733  | 339,9600 | InChI=1S/C12H7N3O/c16-12-11-10(15(11)12)9-8(3-5-14-9)7-2-1-4-13-6-7/h1-6,14H                                       |
| <b>p-14</b>    |  | 20,2351 | 162,081  | -3,9076  | 134,5841 | 339,9657 | InChI=1S/C12H7N3O/c16-11-8-6-9-7(4-5-13-9)2-1-3-10(11)15-12(8)14-15/h1-6,13H/b2-1-,8-6+,10-3+                      |
| <b>o-230</b>   |  | 25,6556 | 238,1183 | -14,0606 | 91,9452  | 339,9695 | InChI=1S/C12H7N3O/c16-12-11-9(3-4-13-11)15(12)5-1-2-7-8-6-14-10(7)8/h1-6,13H/b5-1-,7-2+                            |
| <b>o-77</b>    |  | 6,7134  | 145,262  | -2,141   | 153,9927 | 340,149  | InChI=1S/C12H7N3O/c16-10-6-8-7-2-1-5-15(14-12(8)10)9-3-4-13-11(7)9/h1-6,13H                                        |
| <b>H1-122</b>  |  | 21,1659 | 219,0202 | -17,1838 | 99,1204  | 340,1576 | InChI=1S/C12H7N3O/c16-10-3-1-2-8(7-4-5-13-11(7)10)14-12-9-6-15(9)12/h1-6,13H/b14-12+                               |
| <b>H-160</b>   |  | 18,8293 | 246,3922 | -11,7981 | 85,2565  | 340,4883 | InChI=1S/C12H7N3O/c16-12-14-10-6-7(15(10)12)2-1-3-8-9-4-5-13-11(8)9/h1-6,13H/b2-1-,8-3-                            |
| <b>o-213</b>   |  | 6,89    | 28,3364  | -2,491   | 257,0335 | 340,6312 | InChI=1S/C12H7N3O/c16-12-8-6-15-5-1-2-7(8)10(14-12)11-9(15)3-4-13-11/h1-6,13H                                      |
| <b>o-214</b>   |  | 6,8892  | 28,3366  | -2,4911  | 257,0333 | 340,6312 | InChI=1S/C12H7N3O/c16-12-9-6-7-2-1-5-15(9)8-3-4-13-11(8)10(7)14-12/h1-6,13H                                        |
| <b>p11-22</b>  |  | 47,5233 | 255,5096 | -26,997  | 51,4866  | 340,6455 | InChI=1S/C12H7N3O/c16-12-14-6-9-7(4-5-13-9)2-1-3-8-10-11(8)15(10)12/h1-6,13H/b2-1-,8-3-,14-6-                      |

|                |  |         |          |          |          |          |                                                                                                         |
|----------------|--|---------|----------|----------|----------|----------|---------------------------------------------------------------------------------------------------------|
| <b>q1-4</b>    |  | 15.001  | 163.3035 | -9.7754  | 142.7326 | 340.8909 | InChI=1S/C12H7N3O/c16-12-10-7(4-5-13-10)2-1-3-8-9-6-15(12)14-11(8)9/h1-6,13H/b2-1-,8-3-                 |
| <b>H1-43</b>   |  | 32.1367 | 270.6311 | -22.0138 | 42.194   | 340.9394 | InChI=1S/C12H7N3O/c16-9(12-14-10-6-15(10)12)3-1-2-7-8-4-5-13-11(7)8/h1-6,13H/b3-1-,7-2-                 |
| <b>A-12</b>    |  | 7.8283  | 163.8026 | -3.318   | 145.9023 | 341.0126 | InChI=1S/C12H7N3O/c16-9-6-14-10(9)11-7-2-1-5-15(11)12-8(7)3-4-13-12/h1-6,13H/b11-10-                    |
| <b>H1-107</b>  |  | 15.4403 | 166.0341 | -3.1273  | 149.5285 | 341.2372 | InChI=1S/C12H7N3O/c16-10-3-1-2-7-6-9-12(14-9)15(10)11-8(7)4-5-13-11/h1-6,13H/b3-1-,7-2+                 |
| <b>o-239</b>   |  | 23.6941 | 212.579  | -10.3956 | 83.8807  | 341.2591 | InChI=1S/C12H7N3O/c16-10-6-8-7-2-1-5-15(10)9-3-4-13-12(9)14-11(7)8/h1-6,13H/b5-1-,7-2+,8-6-,14-11-      |
| <b>n-46</b>    |  | 29.4146 | 212.8899 | -11.5776 | 74.2928  | 341.2777 | InChI=1S/C12H7N3O/c16-12-10-7-2-1-5-15(11(10)12)9-3-4-13-8(9)6-14-7/h1-6,14H/b14-6-                     |
| <b>C-41</b>    |  | 4.4506  | 351.5815 | -4.3287  | -5.7000  | 341.4528 | InChI=1S/C12H7N3O/c16-10-6-9-11(15(9)10)7-2-1-4-13-12-8(7)3-5-14-12/h1-6,14H/b11-7-                     |
| <b>H11-47</b>  |  | 16.6399 | 257.5302 | -6.462   | 65.7434  | 341.4878 | InChI=1S/C12H7N3O/c16-12-10-6-14-9-3-1-2-7(9)8-4-5-13-11(8)15(10)12/h1-6,13H/b10-6-,14-9-               |
| <b>H11-154</b> |  | 26.4572 | 163.5921 | -4.3551  | 128.0526 | 341.5085 | InChI=1S/C12H7N3O/c16-10-6-9-7(8-4-5-13-12(8)10)2-1-3-11-14-15(9)11/h1-6,13H                            |
| <b>B-227</b>   |  | 5.3579  | 34.9085  | -1.6482  | 272.4896 | 341.5742 | InChI=1S/C12H7N3O/c16-11-8-2-1-5-15-6-9(11)14-12(15)10-7(8)3-4-13-10/h1-6,13H/b5-1-,8-2-                |
| <b>H-155</b>   |  | 18.8088 | 247.4619 | -11.7108 | 84.8688  | 341.6548 | InChI=1S/C12H7N3O/c16-12-14-11-7(6-15(11)12)2-1-3-8-9-4-5-13-10(8)9/h1-6,13H/b2-1-,8-3-                 |
| <b>q-15</b>    |  | 11.6599 | 174.3275 | -4.9924  | 95.8393  | 341.8057 | InChI=1S/C12H7N3O/c16-12-11-9-6-8(15(12)14-11)3-1-2-7-4-5-13-10(7)9/h1-6,13H/b2-1-,3-1-,7-2-,8-3+,10-9- |
| <b>p-6</b>     |  | 6.8366  | 153.3183 | -5.0923  | 162.1241 | 342.1793 | InChI=1S/C12H7N3O/c16-11-9-3-1-2-7-4-5-13-8(7)6-10-14-12(11)15(9)10/h1-6,13H/b2-1-,9-3-,10-6-           |
| <b>A-81</b>    |  | 25.284  | 273.2003 | -14.4318 | 39.9912  | 342.2298 | InChI=1S/C12H7N3O/c16-12-11-9(6-14-12)15(11)5-1-2-7-8-3-4-13-10(7)8/h1-6,13H/b5-1-,7-2-                 |
| <b>A-126</b>   |  | 25.3688 | 273.0574 | -14.4581 | 40.0425  | 342.3124 | InChI=1S/C12H7N3O/c16-12-11-9(6-14-12)15(11)5-1-2-7-8-3-4-13-10(7)8/h1-6,13H/b5-1-,7-2-                 |
| <b>A1-47</b>   |  | 15.5637 | 210.0589 | -7.7078  | 98.726   | 342.3528 | InChI=1S/C12H7N3O/c16-9-6-13-4-1-2-8-7-3-5-14-10(7)12-11(9)15(8)12/h1-6,14H/b4-1-,8-2+,13-6-            |
| <b>G1-101</b>  |  | 26.5141 | 272.8521 | -17.2613 | 46.5652  | 342.5345 | InChI=1S/C12H7N3O/c16-9(11-12-14-6-15(11)12)3-1-2-7-8-4-5-13-10(7)8/h1-6,13H/b3-1-,7-2-                 |
| <b>q-29</b>    |  | 3.0595  | 347.1067 | -2.7817  | -11.68   | 342.5562 | InChI=1S/C12H7N3O/c16-12-11(14-12)15-6-8-9(15)3-1-2-7-4-5-13-10(7)8/h1-6,13H                            |
| <b>B-19</b>    |  | 24.7065 | 166.7659 | -6.6243  | 113.1278 | 342.6312 | InChI=1S/C12H7N3O/c16-10-6-9-7(8-3-4-13-11(8)10)2-1-5-15-12(9)14-15/h1-6,13H                            |

|                |  |         |          |          |          |          |                                                                                                                |
|----------------|--|---------|----------|----------|----------|----------|----------------------------------------------------------------------------------------------------------------|
| <b>A-24</b>    |  | 24.8631 | 274.6012 | -14.2849 | 39.9973  | 342.7898 | InChI=1S/C12H7N3O/c16-9-6-14-12-11(9)15(12)5-1-2-7-8-3-4-13-10(7)8/h1-6,13H/b5-1-,7-2-                         |
| <b>q1-22</b>   |  | 20.386  | 163.2682 | -4.2615  | 133.6545 | 342.8138 | InChI=1S/C12H7N3O/c16-11-9-6-8(15-12(9)14-15)3-1-2-7-4-5-13-10(7)11/h1-6,13H/b2-1-,8-3+                        |
| <b>A2-10</b>   |  | 14.9032 | 103.8318 | -3.3891  | 199.3327 | 342.865  | InChI=1S/C12H7N3O/c16-10-6-8-11-7(3-5-13-11)9-2-1-4-14-12(8)15(9)10/h1-6,13H                                   |
| <b>H1-87</b>   |  | 23.2985 | 178.7529 | -11.9692 | 132.0101 | 342.9071 | InChI=1S/C12H7N3O/c16-11-3-1-2-8-7-4-5-13-12(7)15(11)10-6-9(10)14-8/h1-6,13H/b3-1-,8-2+                        |
| <b>n-118</b>   |  | 25.2097 | 272.0734 | -14.3146 | 39.8165  | 342.9219 | InChI=1S/C12H7N3O/c16-9-6-14-11-7(10(9)11)2-1-5-15-8-3-4-13-12(8)15/h1-6,13H/b5-1-,7-2+                        |
| <b>A-10</b>    |  | 24.9594 | 274.4688 | -14.3194 | 40.0533  | 342.9464 | InChI=1S/C12H7N3O/c16-9-6-14-12-11(9)15(12)5-1-2-7-8-3-4-13-10(7)8/h1-6,13H/b5-1-,7-2-                         |
| <b>n-50</b>    |  | 29.8255 | 211.6253 | -11.8679 | 77.7922  | 343.038  | InChI=1S/C12H7N3O/c16-11-9-7-2-1-5-15(10(9)11)8-3-4-13-12(8)14-6-7/h1-6,13H/b14-6-                             |
| <b>B-213</b>   |  | 7.0012  | 158.2152 | -2.2356  | 147.8170 | 343.1748 | InChI=1S/C12H7N3O/c16-12-9-6-15-5-1-2-7(10(9)14-12)8-3-4-13-11(8)15/h1-6,13H                                   |
| <b>o-25</b>    |  | 6.4069  | 27.2816  | -2.2409  | 269.506  | 343.3921 | InChI=1S/C12H7N3O/c16-11-7-2-1-5-15-9-3-4-13-10(9)8(7)6-14-12(11)15/h1-6,13H                                   |
| <b>A-196</b>   |  | 6.6402  | 152.9018 | -2.7797  | 163.7295 | 343.43   | InChI=1S/C12H7N3O/c16-11-8-2-1-5-15-6-14-12(15)9(11)10-7(8)3-4-13-10/h1-6,13H/b5-1-,8-2-,12-9-                 |
| <b>H11-117</b> |  | 8.2266  | 33.6961  | -0.9124  | 254.2511 | 343.4601 | InChI=1S/C12H7N3O/c16-12-8-6-15-10(3-1-2-9(12)14-15)7-4-5-13-11(7)8/h1-6,13H                                   |
| <b>p-20</b>    |  | 11.4904 | 200.1261 | -5.614   | 123.1249 | 343.687  | InChI=1S/C12H7N3O/c16-12-9-6-8-7(4-5-13-8)2-1-3-10-11(14-9)15(10)12/h1-6,13H/b2-1-,3-1-,7-2-,8-6+,9-6+,10-3-   |
| <b>I-34</b>    |  | 27.8883 | 240.394  | -11.2846 | 67.7402  | 343.6948 | InChI=1S/C12H7N3O/c16-12-10-9-6-7-8(2-4-13-7)15(9)5-1-3-14-11(10)12/h1-6,13H/b5-1-,14-3+                       |
| <b>E-22</b>    |  | 2.4454  | 322.4384 | -1.3686  | 11.1954  | 343.7677 | InChI=1S/C12H7N3O/c16-12-9-6-7(9)2-1-3-10-8-4-5-13-11(8)15(12)14-10/h1-6,13H/b3-1-,7-2-                        |
| <b>B-225</b>   |  | 19.5656 | 196.7825 | -13.0672 | 124.1779 | 343.9435 | InChI=1S/C12H7N3O/c16-11-9-6-15(12(11)14-9)5-1-2-7-8-3-4-13-10(7)8/h1-6,13H/b5-1-,7-2-                         |
| <b>X22-16</b>  |  | 23.3267 | 247.3793 | -8.642   | 67.9826  | 343.9956 | InChI=1S/C12H7N3O/c16-12-7-6-10-9(15(10)12)2-1-4-13-8-3-5-14-11(7)8/h1-6,14H/b2-1-,4-1-,9-2+,11-7-,13-4-,13-8- |
| <b>k-40</b>    |  | 28.9282 | 209.2907 | -16.1624 | 105.9713 | 344.1004 | InChI=1S/C12H7N3O/c16-12-10-7-6-9(7)15(12)5-1-3-13-8-2-4-14-11(8)10/h1-6,14H/b5-1-,13-3+                       |
| <b>H-19</b>    |  | 10.5753 | 105.831  | -4.2094  | 185.789  | 344.1949 | InChI=1S/C12H7N3O/c16-12-7-2-1-3-8-9-4-5-13-11(9)15(12)14-10(8)6-7/h1-6,13H                                    |
| <b>H-48</b>    |  | 15.6444 | 233.7757 | -9.5521  | 76.382   | 344.296  | InChI=1S/C12H7N3O/c16-12-10-7-6-8(7)13-3-1-5-15(12)9-2-4-14-11(9)10/h1-6,14H/b5-1-,10-7-,13-3-                 |

|               |                                                                                     |          |           |           |           |           |                                                                                                                       |
|---------------|-------------------------------------------------------------------------------------|----------|-----------|-----------|-----------|-----------|-----------------------------------------------------------------------------------------------------------------------|
| <b>n-29</b>   |    | 29, 5408 | 276, 7119 | -10, 6153 | 28, 9063  | 344, 4339 | InChI=1S/C12H7N3O/c16-12-7-6-14-9-2-1-5-15(9)/8-3-4-13-11(8)10(7)12/h1-6, 13H/b14-6-                                  |
| <b>I-90</b>   |    | 30, 9747 | 214, 5762 | -12, 3833 | 75, 3276  | 344, 538  | InChI=1S/C12H7N3O/c16-12-10-8-6-7-9(2-4-14-7)15(11(10)12)5-1-3-13-8/h1-6, 14H/b5-1-, 13-3-                            |
| <b>B-80</b>   |    | 19, 6052 | 194, 1136 | -13, 2924 | 133, 7561 | 344, 7994 | InChI=1S/C12H7N3O/c16-12-9-6-10(12)15(14-9)5-1-2-7-8-3-4-13-11(7)8/h1-6, 13H/b5-1-, 7-2-                              |
| <b>A2-27</b>  |    | 7, 8706  | 59, 8038  | -2, 6803  | 244, 8379 | 345, 1971 | InChI=1S/C12H7N3O/c16-12-11-8-6-15(12)9(2-1-4-13-11)7-3-5-14-10(7)8/h1-6, 14H/b4-1-, 9-2-, 13-11+                     |
| <b>X22-45</b> |    | 13, 0133 | 255, 3054 | -8, 5552  | 50, 7956  | 345, 2312 | InChI=1S/C12H7N3O/c16-12-10-6-9-8(15(9)10)2-1-4-13-7-3-5-14-11(7)12/h1-6, 14H/b2-1-, 13-4-                            |
| <b>H1-120</b> |    | 11, 8082 | 116, 4633 | -4, 5121  | 178, 3122 | 345, 4397 | InChI=1S/C12H7N3O/c16-10-3-1-2-9-7-4-5-13-11(7)8-6-15(9)12(8)14-10/h1-6, 13H/b3-1-, 9-2-, 14-12-                      |
| <b>o-150</b>  |    | 19, 2749 | 196, 1112 | -4, 7853  | 106, 7636 | 345, 7449 | InChI=1S/C12H7N3O/c16-10-6-7-11(14-7)12-9(3-4-13-12)15-5-1-2-8(10)15/h1-6, 13H/b7-6+                                  |
| <b>o-58</b>   |    | 6, 7927  | 78, 2316  | -3, 4083  | 224, 6331 | 345, 8865 | InChI=1S/C12H7N3O/c16-11-8-6-7-2-1-5-15(12(11)14-8)9-3-4-13-10(7)9/h1-6, 13H/b8-6-                                    |
| <b>A-215</b>  |   | 27, 2205 | 112, 8724 | -6, 5043  | 147, 4820 | 345, 9276 | InChI=1S/C12H7N3O/c16-12-9-7-2-1-5-15(6-14-12)11(9)10-8(7)3-4-13-10/h1-6, 13H                                         |
| <b>X22-7</b>  |  | 8, 6989  | 196, 5303 | -5, 2672  | 118, 8898 | 345, 966  | InChI=1S/C12H7N3O/c16-12-8-6-15(12)11-7(8)2-1-4-13-9-3-5-14-10(9)11/h1-6, 14H/b2-1-, 4-1-, 7-2-, 11-10-, 13-4-, 13-9- |
| <b>B-148</b>  |  | 10, 4175 | 85, 0375  | -3, 0521  | 215, 5314 | 346, 0132 | InChI=1S/C12H7N3O/c16-11-8-2-1-5-15-10(14-12(11)15)6-9-7(8)3-4-13-9/h1-6, 13H/b10-6-                                  |
| <b>k-28</b>   |  | 5, 4225  | 325, 9488 | -1, 4559  | 0, 87     | 346, 0175 | InChI=1S/C12H7N3O/c16-9-6-8-12-10(9)11-7(2-4-14-11)13-3-1-5-15(8)12/h1-6, 14H/b5-1-, 13-3+                            |
| <b>H11-63</b> |  | 19, 1861 | 247, 2316 | -12, 1016 | 91, 9471  | 346, 2341 | InChI=1S/C12H7N3O/c16-11-6-10-14-9(15(10)11)3-1-2-7-8-4-5-13-12(7)8/h1-6, 13H/b3-1-, 7-2-                             |
| <b>o-208</b>  |  | 16, 8387 | 214, 3139 | -10, 0793 | 101, 8748 | 346, 6231 | InChI=1S/C12H7N3O/c16-12-7-6-9(7)14-8-2-1-5-15(12)10-3-4-13-11(8)10/h1-6, 13H/b14-9-                                  |
| <b>n-114</b>  |  | 12, 9075 | 155, 019  | -4, 5817  | 141, 6958 | 346, 8738 | InChI=1S/C12H7N3O/c16-9-6-14-11(9)12-7-2-1-5-15(12)8-3-4-13-10(7)8/h1-6, 13H/b12-11+                                  |
| <b>G-70</b>   |  | 13, 9741 | 208, 9391 | -5, 7467  | 124, 9914 | 347, 2313 | InChI=1S/C12H7N3O/c16-10-6-14-12-8(4-5-13-12)7-2-1-3-9-11(7)15(9)10/h1-6, 13H/b14-6+                                  |
| <b>x4-46</b>  |  | 11, 0851 | 146, 8777 | -4, 591   | 156, 5231 | 347, 3151 | InChI=1S/C12H7N3O/c16-12-9-8-3-1-2-7-4-5-13-10(7)11(9)14-6-15(8)12/h1-6, 13H/b2-1-, 3-1-, 7-2-, 8-3-, 11-10-          |
| <b>B-54</b>   |  | 19, 4473 | 192, 9077 | -12, 6764 | 138, 0841 | 347, 5067 | InChI=1S/C12H7N3O/c16-9-6-10-14-12(9)15(10)5-1-2-7-8-3-4-13-11(7)8/h1-6, 13H/b5-1-, 7-2-                              |
| <b>X-27</b>   |  | 32, 8016 | 246, 0185 | -12, 7483 | 37, 7256  | 347, 5645 | InChI=1S/C12H7N3O/c16-12-10-9-6-7(2-1-4-14-12)8-3-5-13-11(8)15(9)10/h1-6, 13H/b2-1-, 14-4+                            |

|                                                                                     |          |           |           |           |           |                                                                                                                      |
|-------------------------------------------------------------------------------------|----------|-----------|-----------|-----------|-----------|----------------------------------------------------------------------------------------------------------------------|
|    | 18, 2034 | 161, 8705 | -4, 5004  | 152, 0422 | 347, 6037 | InChI=1S/C12H7N3O/c16-11-9-6-15-12(14-15)8(9)3-1-2-7-4-5-13-10(7)11/h1-6, 13H/b2-1-, 8-3+                            |
| <b>q1-45</b><br><chem>C12H7N3O</chem>                                               |          |           |           |           |           |                                                                                                                      |
|    | 6, 6121  | 152, 463  | -1, 516   | 164, 5354 | 347, 6637 | InChI=1S/C12H7N3O/c16-10-3-1-2-8-7-4-5-13-12(7)15-9(10)6-11(15)14-8/h1-6, 13H/b3-1-, 8-2-                            |
| <b>H1-141</b><br><chem>C12H7N3O</chem>                                              |          |           |           |           |           |                                                                                                                      |
|    | 15, 8426 | 170, 8558 | -12, 1393 | 146, 6974 | 347, 7367 | InChI=1S/C12H7N3O/c16-12-8-6-7(10(8)14-12)2-1-5-15-9-3-4-13-11(9)15/h1-6, 13H/b5-1-, 7-2+                            |
| <b>o-211</b><br><chem>C12H7N3O</chem>                                               |          |           |           |           |           |                                                                                                                      |
|    | 9, 0394  | 151, 7148 | -4, 2375  | 150, 8343 | 347, 8085 | InChI=1S/C12H7N3O/c16-12-8-6-15(12)11-10-7(4-5-13-10)2-1-3-9(8)14-11/h1-6, 13H/b2-1-, 3-1-, 7-2-, 9-3-, 11-10-       |
| <b>s11-10</b><br><chem>C12H7N3O</chem>                                              |          |           |           |           |           |                                                                                                                      |
|    | 12, 8241 | 205, 0944 | -5, 1018  | 94, 6472  | 347, 988  | InChI=1S/C12H7N3O/c16-12-8-2-1-3-10(14-12)15-6-9(15)11-7(8)4-5-13-11/h1-6, 13H                                       |
| <b>H11-111</b><br><chem>C12H7N3O</chem>                                             |          |           |           |           |           |                                                                                                                      |
|    | 46, 3916 | 257, 1949 | -26, 7209 | 60, 8682  | 348, 1159 | InChI=1S/C12H7N3O/c16-9-3-1-2-7-4-5-13-8(7)6-14-10-11-12(10)15(9)11/h1-6, 13H/b3-1-, 7-2-, 8-6+, 14-10-              |
| <b>x6-7</b><br><chem>C12H7N3O</chem>                                                |          |           |           |           |           |                                                                                                                      |
|    | 12, 5729 | 54, 0028  | -3, 5848  | 222, 9789 | 348, 1640 | InChI=1S/C12H7N3O/c16-12-11-7-2-1-5-15(12)9(6-14-11)10-8(7)3-4-13-10/h1-6, 13H                                       |
| <b>B-202</b><br><chem>C12H7N3O</chem>                                               |          |           |           |           |           |                                                                                                                      |
|    | 12, 9559 | 129, 7493 | -9, 3496  | 190, 5005 | 348, 4503 | InChI=1S/C12H7N3O/c16-10-6-9-12-11-7(3-5-14-11)8(15(9)12)2-1-4-13-10/h1-6, 14H/b2-1-, 9-6-, 13-4+                    |
| <b>D-19</b><br><chem>C12H7N3O</chem>                                                |          |           |           |           |           |                                                                                                                      |
|   | 10, 435  | 114, 626  | -4, 0662  | 189, 6572 | 348, 667  | InChI=1S/C12H7N3O/c16-12-9-3-1-2-7-6-10(14-9)15(12)11-8(7)4-5-13-11/h1-6, 13H/b2-1-, 3-1-, 7-2+, 9-3-                |
| <b>H11-19</b><br><chem>C12H7N3O</chem>                                              |          |           |           |           |           |                                                                                                                      |
|  | 8, 5587  | 74, 3810  | -4, 4111  | 233, 5550 | 348, 9412 | InChI=1S/C12H7N3O/c16-11-7-2-1-5-15-9(11)6-10(15)14-12-8(7)3-4-13-12/h1-6, 13H/b14-10-                               |
| <b>B-86</b><br><chem>C12H7N3O</chem>                                                |          |           |           |           |           |                                                                                                                      |
|  | 8, 8614  | 100, 5732 | -3, 9438  | 208, 915  | 348, 9871 | InChI=1S/C12H7N3O/c16-12-8-6-7-2-1-5-15(12)9-3-4-13-11(9)10(7)14-8/h1-6, 13H/b5-1-, 7-2-                             |
| <b>o-203</b><br><chem>C12H7N3O</chem>                                               |          |           |           |           |           |                                                                                                                      |
|  | 7, 1678  | 104, 3791 | -0, 9996  | 205, 2586 | 349, 2052 | InChI=1S/C12H7N3O/c16-9-6-14-12-10-7(9)2-1-5-15(12)8-3-4-13-11(8)10/h1-6, 13H                                        |
| <b>n-125</b><br><chem>C12H7N3O</chem>                                               |          |           |           |           |           |                                                                                                                      |
|  | 14, 5623 | 171, 3439 | -4, 6292  | 132, 4518 | 349, 5789 | InChI=1S/C12H7N3O/c16-12-9-6-7-2-1-4-14-15(12)11(9)10-8(7)3-5-13-10/h1-6, 13H/b2-1-, 14-4+                           |
| <b>X-33</b><br><chem>C12H7N3O</chem>                                                |          |           |           |           |           |                                                                                                                      |
|  | 7, 1555  | 231, 1202 | -3, 8667  | 79, 642   | 349, 6081 | InChI=1S/C12H7N3O/c16-10-3-1-2-8-7-4-5-13-11(7)9-6-15(9)12(10)14-8/h1-6, 13H                                         |
| <b>H1-54</b><br><chem>C12H7N3O</chem>                                               |          |           |           |           |           |                                                                                                                      |
|  | 13, 1158 | 198, 9243 | -6, 5594  | 127, 9609 | 349, 9043 | InChI=1S/C12H7N3O/c16-12-7-6-10-9(15(10)12)2-1-4-13-8-3-5-14-11(7)8/h1-6, 14H/b2-1-, 4-1-, 9-2-, 11-7+, 13-4-, 13-8- |
| <b>i-23</b><br><chem>C12H7N3O</chem>                                                |          |           |           |           |           |                                                                                                                      |
|  | 22, 864  | 218, 0959 | -8, 2691  | 105, 2427 | 350, 0516 | InChI=1S/C12H7N3O/c16-12-8-2-1-3-9-10(15(9)12)6-14-11-7(8)4-5-13-11/h1-6H, (H, 13, 14)                               |
| <b>F-64</b><br><chem>C12H7N3O</chem>                                                |          |           |           |           |           |                                                                                                                      |
|  | 14, 8049 | 280, 3973 | -5, 9719  | 36, 0178  | 350, 0609 | InChI=1S/C12H7N3O/c16-12-10-9-6-14-11-8(3-4-13-11)7(9)2-1-5-15(10)12/h1-6, 13H                                       |
| <b>A-69</b><br><chem>C12H7N3O</chem>                                                |          |           |           |           |           |                                                                                                                      |
|  | 31, 7238 | 322, 6931 | -16, 6811 | 5, 9921   | 350, 127  | InChI=1S/C12H7N3O/c16-12-11-9(15(11)12)6-7-2-1-4-13-8-3-5-14-10(7)8/h1-6, 14H/b7-6-                                  |
| <b>X23-12</b><br><chem>C12H7N3O</chem>                                              |          |           |           |           |           |                                                                                                                      |
|  | 13, 1224 | 137, 5348 | -7, 1533  | 176, 3974 | 350, 1749 | InChI=1S/C12H7N3O/c16-12-10-6-8-7(4-5-13-8)2-1-3-9-11(14-12)15(9)10/h1-6, 13H/b2-1-, 9-3-, 10-6-                     |
| <b>p-21</b><br><chem>C12H7N3O</chem>                                                |          |           |           |           |           |                                                                                                                      |

|               |                                                                                     |          |           |           |                |           |                                                                                                                      |
|---------------|-------------------------------------------------------------------------------------|----------|-----------|-----------|----------------|-----------|----------------------------------------------------------------------------------------------------------------------|
| <b>G1-29</b>  |    | 33, 9519 | 146, 0801 | -1, 5755  | 101, 8145      | 350, 2226 | InChI=1S/C12H7N3O/c16-10-3-1-2-7-8-4-5-13-12(8)15-11(10)9(7)6-14-15/h1-6, 13H                                        |
| <b>X22-8</b>  |    | 8, 3567  | 195, 4239 | -5, 1717  | 127, 0533      | 350, 3507 | InChI=1S/C12H7N3O/c16-12-7-6-15(12)9-2-1-4-13-8-3-5-14-11(8)10(7)9/h1-6, 14H/b2-1-, 4-1+, 9-2+, 11-10+, 13-4+, 13-8- |
| <b>x3-5</b>   |    | 30, 6802 | 211, 7078 | -16, 4982 | 92, 7628       | 350, 6896 | InChI=1S/C12H7N3O/c16-12-9-7-6-15(5-1-3-13-11(9)12)8-2-4-14-10(7)8/h1-6, 14H/b2-1-, 4-1+, 9-2+, 11-10+, 13-4+, 13-3+ |
| <b>q-50</b>   |    | 12, 8393 | 207, 8316 | -3, 8111  | 114, 6303      | 350, 9989 | InChI=1S/C12H7N3O/c16-12-8-3-1-2-7-4-5-13-10(7)9(6-8)11-14-15(11)12/h1-6, 13H/b2-1-, 3-1-, 7-2-, 8-3+, 10-9-         |
| <b>B-140</b>  |    | 18, 9131 | 195, 0910 | -9, 4755  | 130, 2210      | 351, 2580 | InChI=1S/C12H7N3O/c16-12-8-2-1-5-15(12)11-10(14-11)6-9-7(8)3-4-13-9/h1-6, 13H/b10-6+                                 |
| <b>B-186</b>  |    | 19, 9836 | 197, 8071 | -12, 9876 | 132, 7640      | 351, 2701 | InChI=1S/C12H7N3O/c16-11-9-6-14-12(11)15(9)5-1-2-7-8-3-4-13-10(7)8/h1-6, 13H/b5-1-, 7-2-                             |
| <b>s12-4</b>  |    | 21, 5801 | 245, 8718 | -7, 4915  | 54, 1935       | 351, 3019 | InChI=1S/C12H7N3O/c16-12-11-9-6-8-7(4-5-13-8)2-1-3-10(14-9)15(11)12/h1-6, 13H/b3-1-, 7-2-, 8-6+                      |
| <b>F-12</b>   |    | 9, 9313  | 93, 9073  | -3, 821   | 211, 1584      | 351, 7119 | InChI=1S/C12H7N3O/c16-11-8-6-15-9(2-1-3-10(11)15)7-4-5-13-12(7)14-8/h1-6H, (H, 13, 14)                               |
| <b>X-21</b>   |    | 32, 0847 | 326, 1695 | -16, 6754 | 3, 1212        | 351, 7200 | InChI=1S/C12H7N3O/c16-12-10-9(15(10)12)6-7-2-1-4-13-11-8(7)3-5-14-11/h1-6, 14H/b7-6-                                 |
| <b>C-71</b>   |  | 3, 2809  | 301, 8370 | -2, 1021  | 33, 6623       | 351, 8446 | InChI=1S/C12H7N3O/c16-12-14-4-1-2-8-7-3-5-13-9(7)6-10-11(8)15(10)12/h1-6, 13H/b2-1-, 14-4+                           |
| <b>x6-8</b>   |  | 36, 2323 | 245, 9439 | -24, 022  | 67, 4751       | 352, 0725 | InChI=1S/C12H7N3O/c16-9-3-1-2-7-4-5-13-8(7)6-15-11-10(14-9)12(11)15/h1-6, 13H/b3-1-, 7-2-, 8-6-, 14-10-              |
| <b>o-47</b>   |  | 8, 0347  | 32, 6852  | -2, 5691  | 271, 1097      | 352, 0924 | InChI=1S/C12H7N3O/c16-12-7-6-15-5-1-2-8(7)14-11(12)10-9(15)3-4-13-10/h1-6, 13H                                       |
| <b>C-72</b>   |  | 25, 4956 | 293, 7610 | -6, 7510  | 19, 6725       | 352, 1818 | InChI=1S/C12H7N3O/c16-12-14-4-1-2-7-8-3-5-13-11(8)10(7)9-6-15(9)12/h1-6, 13H/b2-1-, 14-4+                            |
| <b>H11-57</b> |  | 24, 7558 | 242, 1763 | -6, 3139  | 75, 4533       | 352, 2242 | InChI=1S/C12H7N3O/c16-11-6-9-7(8-4-5-13-12(8)9)2-1-3-10-14-15(10)11/h1-6, 13H/b3-1-, 7-2-, 9-6+                      |
| <b>p1-49</b>  |  | 18, 3122 | 157, 8525 | -4, 4159  | 162, 9778      | 352, 2746 | InChI=1S/C12H7N3O/c16-9-3-1-2-7-4-5-13-11(7)10-8(9)6-15-12(10)14-15/h1-6, 13H/b3-1-, 7-2-, 11-10-                    |
| <b>n-175</b>  |  | 9, 249   | 43, 0967  | -3, 3568  | 261, 357       | 352, 4087 | InChI=1S/C12H7N3O/c16-11-7-2-1-5-15-8-3-4-13-10(8)9(11)12(15)14-6-7/h1-6, 13H/b5-1-, 7-2+                            |
| <b>A2-29</b>  |  | 26, 3864 | 177, 0612 | -17, 3042 | 5, 0238352, 47 | 352, 4726 | InChI=1S/C12H7N3O/c16-12-11-10-8(3-5-14-10)7(2-1-4-13-11)9-6-15(9)12/h1-6, 14H/b2-1-, 4-1-, 7-2+, 13-4-, 13-11+      |
| <b>i-83</b>   |  | 7, 1166  | 211, 6778 | -5, 6091  | 112, 3748      | 352, 5915 | InChI=1S/C12H7N3O/c16-12-9-7-6-13-3-1-5-15(11(7)9)8-2-4-14-10(8)12/h1-6, 14H/b5-1-, 7-6-, 13-3-                      |
| <b>B-44</b>   |  | 8, 4456  | 32, 7371  | -3, 2322  | 265, 2683      | 352, 6131 | InChI=1S/C12H7N3O/c16-10-6-9-11-8(3-4-13-11)7-2-1-5-15(9)14-12(7)10/h1-6, 13H                                        |



|               |                                                                                     |                    |         |          |          |          |          |                                                                                                               |
|---------------|-------------------------------------------------------------------------------------|--------------------|---------|----------|----------|----------|----------|---------------------------------------------------------------------------------------------------------------|
| <b>B-179</b>  | 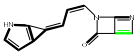   | $C_{22}H_{23}N_2O$ | 22.1370 | 224.1673 | -13.2651 | 116.7235 | 352.7252 | InChI=1S/C12H7N3O/c16-12-9-6-14-11(9)15(12)5-1-2-7-8-3-4-13-10(7)8/h1-6,13H/b5-1-,7-2-                        |
| <b>A1-6</b>   |    | $C_{22}H_{23}N_2O$ | 21.8975 | 284.5503 | -8.227   | 42.8425  | 352.8862 | InChI=1S/C12H7N3O/c16-12-11-9-7(8-3-5-14-10(8)9)2-1-4-13-6-15(11)12/h1-6,14H/b4-1-,7-2-,11-9-,13-6-           |
| <b>H-29</b>   |    | $C_{22}H_{23}N_2O$ | 10.9934 | 90.9764  | -3.1155  | 206.659  | 352.8959 | InChI=1S/C12H7N3O/c16-12-7-2-1-3-8-9-4-5-13-10(9)15(6-7)11(8)14-12/h1-6,13H/b2-1-,8-3-                        |
| <b>H11-12</b> |    | $C_{22}H_{23}N_2O$ | 9.2379  | 95.0732  | -3.8468  | 218.0315 | 353.2159 | InChI=1S/C12H7N3O/c16-12-14-9-2-1-3-10-7-4-5-13-11(7)8(9)6-15(10)12/h1-6,13H/b2-1-,10-3-                      |
| <b>F-62</b>   |    | $C_{22}H_{23}N_2O$ | 15.0158 | 242.1577 | -8.0848  | 78.1088  | 353.3531 | InChI=1S/C12H7N3O/c16-12-9-3-1-2-7-6-10(7)15(12)14-11-8(9)4-5-13-11/h1-6H, (H,13,14)/b3-1-,7-2-               |
| <b>o-110</b>  |    | $C_{22}H_{23}N_2O$ | 17.0761 | 177.0623 | -12.6082 | 146.7406 | 353.422  | InChI=1S/C12H7N3O/c16-11-7(10-8(11)6-14-10)2-1-5-15-9-3-4-13-12(9)15/h1-6,13H/b5-1-,7-2-                      |
| <b>A1-21</b>  |    | $C_{22}H_{23}N_2O$ | 11.6947 | 228.2749 | -3.2068  | 96.4631  | 353.427  | InChI=1S/C12H7N3O/c16-12-8-2-1-4-13-6-9-11(15(9)12)10-7(8)3-5-14-10/h1-6,14H/b2-1-,4-1-,8-2-,9-6-,13-4-,13-6- |
| <b>H1-16</b>  |    | $C_{22}H_{23}N_2O$ | 11.0594 | 177.9608 | -4.1784  | 140.3135 | 353.4631 | InChI=1S/C12H7N3O/c16-11-3-1-2-7-8-4-5-13-12(8)15(11)10-6-9(7)14-10/h1-6,13H/b3-1-,7-2+                       |
| <b>A-158</b>  |   | $C_{22}H_{23}N_2O$ | 15.3142 | 283.8904 | -6.0637  | 35.6041  | 353.5351 | InChI=1S/C12H7N3O/c16-12-11-10-8(2-1-5-15(11)12)7-3-4-13-9(7)6-14-10/h1-6,13H                                 |
| <b>x9-46</b>  |  | $C_{22}H_{23}N_2O$ | 38.0515 | 229.067  | -23.8994 | 80.7424  | 353.7788 | InChI=1S/C12H7N3O/c16-12-9-7(4-5-13-9)2-1-3-8-10-11(8)15(10)6-14-12/h1-6,13H/b2-1-,8-3-,14-6-                 |
| <b>H11-90</b> |  | $C_{22}H_{23}N_2O$ | 24.3526 | 163.9546 | -16.628  | 153.2787 | 354.178  | InChI=1S/C12H7N3O/c16-12-8-2-1-3-9(14-10-6-15(10)12)11-7(8)4-5-13-11/h1-6,13H/b14-9+                          |
| <b>H-35</b>   |  | $C_{22}H_{23}N_2O$ | 15.9689 | 227.0712 | -3.4489  | 94.6273  | 354.3727 | InChI=1S/C12H7N3O/c16-10-6-7-2-1-3-8(7)9-4-5-13-11(9)15-12(10)14-15/h1-6,13H/b7-6-                            |
| <b>q-46</b>   |  | $C_{22}H_{23}N_2O$ | 9.9801  | 227.5151 | -3.9076  | 110.2736 | 354.6103 | InChI=1S/C12H7N3O/c16-10-6-8-11-7(4-5-13-11)2-1-3-9-12(14-8)15(9)10/h1-6,13H/b2-1-,9-3+                       |
| <b>A-170</b>  |  | $C_{22}H_{23}N_2O$ | 27.9465 | 232.8078 | -10.1632 | 86.4161  | 355.1117 | InChI=1S/C12H7N3O/c16-11-9-10(11)15-5-1-2-7(6-14-9)8-3-4-13-12(8)15/h1-6,13H/b14-6-                           |
| <b>q1-19</b>  |  | $C_{22}H_{23}N_2O$ | 19.7557 | 209.9681 | -13.8179 | 116.8716 | 355.342  | InChI=1S/C12H7N3O/c16-11-8(9-6-15-12(9)14-15)3-1-2-7-4-5-13-10(7)11/h1-6,13H                                  |
| <b>q1-23</b>  |  | $C_{22}H_{23}N_2O$ | 7.2804  | 157.7975 | -2.4385  | 168.4003 | 355.417  | InChI=1S/C12H7N3O/c16-11-8-6-15-9(14-12(8)15)3-1-2-7-4-5-13-10(7)11/h1-6,13H/b2-1-,9-3-                       |
| <b>s11-51</b> |  | $C_{22}H_{23}N_2O$ | 13.2577 | 205.9148 | -3.0692  | 125.4356 | 355.7266 | InChI=1S/C12H7N3O/c16-12-8-3-1-2-7-4-5-13-11(7)9-6-10(14-8)15(9)12/h1-6,13H/b2-1-,3-1-,7-2-,8-3+,11-9+        |
| <b>A2-69</b>  |  | $C_{22}H_{23}N_2O$ | 24.0255 | 227.9868 | -12.5083 | 74.7545  | 355.8438 | InChI=1S/C12H7N3O/c16-12-10-7(3-5-14-10)8-2-1-4-13-11(12)9-6-15(8)9/h1-6,14H/b4-1-,8-2-,13-11+                |
| <b>B-91</b>   |  | $C_{22}H_{23}N_2O$ | 8.5383  | 282.3750 | -7.4345  | 68.4081  | 355.9379 | InChI=1S/C12H7N3O/c16-12-10-6-9-7(2-1-5-15(10)12)8-3-4-13-11(8)14-9/h1-6,13H/b5-1-,7-2-,10-6-                 |

|               |                                                                                                                                        |         |          |          |          |          |                                                                                                                     |
|---------------|----------------------------------------------------------------------------------------------------------------------------------------|---------|----------|----------|----------|----------|---------------------------------------------------------------------------------------------------------------------|
| <b>G1-99</b>  |                                                       | 10.9977 | 174.2464 | -1.8165  | 151.5534 | 356.0999 | InChI=1S/C12H7N3O/c16-9-3-1-2-8-7-4-5-13-11(7)10(9)12-14-6-15(8)12/h1-6,13H/b3-1-,8-2-                              |
| <b>o-251</b>  |                                                       | 26.0913 | 203.7383 | -9.3129  | 93.8813  | 356.12   | InChI=1S/C12H7N3O/c16-12-14-11-7-2-1-5-15(12)10-3-4-13-9(10)6-8(7)11/h1-6,13H/b5-1-,7-2-,8-6-,14-11-                |
| <b>B-46</b>   | <br>C <sub>12</sub> H <sub>7</sub> N <sub>3</sub> O   | 17.6995 | 89.6610  | -3.6359  | 210.5486 | 356.2227 | InChI=1S/C12H7N3O/c16-10-6-9-11-7(3-4-13-11)8-2-1-5-15(9)12(8)14-10/h1-6,13H                                        |
| <b>E-67</b>   | <br>C <sub>12</sub> H <sub>7</sub> N <sub>3</sub> O   | 25.1885 | 166.5068 | -16.8885 | 148.1195 | 356.429  | InChI=1S/C12H7N3O/c16-12-8-2-1-3-9(14-10-6-15(10)12)7-4-5-13-11(7)8/h1-6,13H/b14-9+                                 |
| <b>q1-57</b>  | <br>C <sub>12</sub> H <sub>7</sub> N <sub>3</sub> O   | 8.4494  | 180.4311 | -5.574   | 143.4827 | 356.4295 | InChI=1S/C12H7N3O/c16-11-10-7(4-5-13-10)2-1-3-9-8-6-15(9)12(11)14-8/h1-6,13H/b2-1-,9-3-                             |
| <b>E-27</b>   | <br>C <sub>12</sub> H <sub>7</sub> N <sub>3</sub> O   | 5.9458  | 96.7895  | -2.2615  | 223.6454 | 356.468  | InChI=1S/C12H7N3O/c16-12-10-6-7-2-1-3-9(14-10)8-4-5-13-11(8)15(7)12/h1-6,13H/b2-1-,3-1-,7-2-,9-3-                   |
| <b>o-170</b>  | <br>C <sub>12</sub> H <sub>7</sub> N <sub>3</sub> O   | 18.6294 | 173.4723 | -13.674  | 139.3953 | 356.5295 | InChI=1S/C12H7N3O/c16-12-7-2-1-5-15(10-6-8(10)14-12)9-3-4-13-11(7)9/h1-6,13H/b14-8-                                 |
| <b>G1-63</b>  | <br>C <sub>12</sub> H <sub>7</sub> N <sub>3</sub> O   | 29.1437 | 289.4842 | -18.4399 | 40.5821  | 357.019  | InChI=1S/C12H7N3O/c16-10(12-9-6-14-15(9)12)3-1-2-7-8-4-5-13-11(7)8/h1-6,13H/b3-1-,7-2-                              |
| <b>B-235</b>  | <br>C <sub>12</sub> H <sub>7</sub> N <sub>3</sub> O   | 8.6235  | 70.3362  | -3.1036  | 241.9506 | 357.1469 | InChI=1S/C12H7N3O/c16-12-8-2-1-5-15-6-9(11(15)14-12)10-7(8)3-4-13-10/h1-6,13H/b5-1-,8-2-                            |
| <b>C-46</b>   | <br>C <sub>12</sub> H <sub>7</sub> N <sub>3</sub> O  | 18.9583 | 193.5453 | -6.9511  | 134.2526 | 357.1578 | InChI=1S/C12H7N3O/c16-10-6-9-11-7(2-1-4-13-10)8-3-5-14-12(8)15(9)11/h1-6,14H/b2-1-,9-6-,13-4-                       |
| <b>o-113</b>  | <br>C <sub>12</sub> H <sub>7</sub> N <sub>3</sub> O | 5.1407  | 38.9076  | -1.4712  | 278.4769 | 357.1695 | InChI=1S/C12H7N3O/c16-12-7-2-1-5-15-6-8(12)14-10(7)11-9(15)3-4-13-11/h1-6,13H/b5-1-,7-2+                            |
| <b>C-14</b>   | <br>C <sub>12</sub> H <sub>7</sub> N <sub>3</sub> O | 12.8227 | 146.6011 | -2.9815  | 165.6015 | 357.1712 | InChI=1S/C12H7N3O/c16-12-10-6-9-7(2-1-4-14-15(9)10)8-3-5-13-11(8)12/h1-6,13H                                        |
| <b>D-3</b>    | <br>C <sub>12</sub> H <sub>7</sub> N <sub>3</sub> O | 17.7607 | 201.6942 | -8.8305  | 124.2492 | 357.3225 | InChI=1S/C12H7N3O/c16-12-8-6-15-9(2-1-4-14-15)7-3-5-13-11(7)10(8)12/h1-6,13H                                        |
| <b>p11-18</b> | <br>C <sub>12</sub> H <sub>7</sub> N <sub>3</sub> O | 35.7288 | 217.797  | -18.888  | 91.1     | 357.3365 | InChI=1S/C12H7N3O/c16-12-10-9-3-1-2-7-4-5-13-8(7)6-14-11(10)15(9)12/h1-6,13H/b2-1-,3-1-,7-2-,8-6-,9-3-,14-6-,14-11+ |
| <b>G-16</b>   | <br>C <sub>12</sub> H <sub>7</sub> N <sub>3</sub> O | 30.3066 | 317.8375 | -11.7133 | 13.8911  | 357.337  | InChI=1S/C12H7N3O/c16-12(15-6-14-15)9-3-1-2-7-8-4-5-13-11(8)10(7)9/h1-6,13H                                         |
| <b>X-3</b>    | <br>C <sub>12</sub> H <sub>7</sub> N <sub>3</sub> O | 23.7712 | 254.4892 | -7.4976  | 66.1850  | 357.3994 | InChI=1S/C12H7N3O/c16-12-9-10-8(3-5-13-10)7-2-1-4-14-15(6-7)11(9)12/h1-6,13H                                        |
| <b>H1-81</b>  | <br>C <sub>12</sub> H <sub>7</sub> N <sub>3</sub> O | 18.066  | 235.2784 | -14.2733 | 87.0236  | 357.4388 | InChI=1S/C12H7N3O/c16-11-3-1-2-7-8-4-5-13-12(8)15(11)14-10-6-9(7)10/h1-6,13H/b3-1-,7-2+                             |
| <b>B-253</b>  | <br>C <sub>12</sub> H <sub>7</sub> N <sub>3</sub> O | 20.6503 | 286.7302 | -7.6626  | 31.9001  | 357.4569 | InChI=1S/C12H7N3O/c16-12-11(14-12)15-5-1-2-7-8-3-4-13-10(8)9(7)6-15/h1-6,13H                                        |
| <b>H-116</b>  | <br>C <sub>12</sub> H <sub>7</sub> N <sub>3</sub> O | 7.098   | 82.984   | -2.6601  | 233.2515 | 357.6086 | InChI=1S/C12H7N3O/c16-12-10-7-2-1-3-9(15(12)6-7)8-4-5-13-11(8)14-10/h1-6,13H                                        |

|               |                                                                                     |         |          |          |          |          |                                                                                                           |
|---------------|-------------------------------------------------------------------------------------|---------|----------|----------|----------|----------|-----------------------------------------------------------------------------------------------------------|
| <b>q1-40</b>  |    | 19,3674 | 129,8165 | -11,7222 | 190,3512 | 357,6256 | InChI=1S/C12H7N3O/c16-12-11-7(4-5-13-11)2-1-3-8-9-6-10(14-12)15(8)9/h1-6,13H/b2-1-,8-3-,14-10-            |
| <b>F-7</b>    |    | 11,7877 | 145,3081 | -3,3714  | 169,1319 | 357,6466 | InChI=1S/C12H7N3O/c16-11-9-3-1-2-7-6-10(11)15(9)14-12-8(7)4-5-13-12/h1-6H,(H,13,14)/b2-1-,9-3+            |
| <b>B-152</b>  |    | 6,6045  | 138,8015 | -3,0580  | 178,6818 | 357,6659 | InChI=1S/C12H7N3O/c16-12-9-6-7-2-1-5-15(11(9)14-12)10-8(7)3-4-13-10/h1-6,13H                              |
| <b>B-59</b>   |    | 18,5091 | 148,5981 | -14,3403 | 166,2510 | 357,7080 | InChI=1S/C12H7N3O/c16-11-7-2-1-5-15(14-10-6-9(10)11)12-8(7)3-4-13-12/h1-6,13H/b14-10-                     |
| <b>x3-12</b>  |    | 27,8299 | 243,9356 | -10,6665 | 75,718   | 357,7978 | InChI=1S/C12H7N3O/c16-12-9-7-6-15(5-1-3-13-11(9)12)8-2-4-14-10(7)8/h1-6,14H/b5-1-,13-3-                   |
| <b>x4-15</b>  |    | 6,3976  | 182,3631 | -2,4661  | 138,787  | 358,0612 | InChI=1S/C12H7N3O/c16-12-8-3-1-2-7-4-5-13-11(7)10(12)9-6-14-15(8)9/h1-6,13H/b2-1-,8-3+                    |
| <b>G-81</b>   |    | 7,428   | 171,7295 | -2,4283  | 153,372  | 358,076  | InChI=1S/C12H7N3O/c16-12-14-6-10-7-2-1-3-9(15(10)12)11-8(7)4-5-13-11/h1-6,13H                             |
| <b>E-72</b>   |    | 19,5873 | 214,2455 | -12,3519 | 107,7775 | 358,4599 | InChI=1S/C12H7N3O/c16-12-14-9-3-1-2-8(10-6-15(10)12)11-7(9)4-5-13-11/h1-6,13H/b14-9+                      |
| <b>H-16</b>   |    | 26,2718 | 253,645  | -0,7124  | 65,0697  | 358,4805 | InChI=1S/C12H7N3O/c16-12-8-3-1-2-7(6-8)9-4-5-13-10(9)11-14-15(11)12/h1-6,13H                              |
| <b>q1-55</b>  |   | 17,8728 | 131,0019 | -11,355  | 197,2071 | 358,9308 | InChI=1S/C12H7N3O/c16-9-6-10-14-12-8(15(10)12)3-1-2-7-4-5-13-11(7)9/h1-6,13H/b2-1-,8-3-,10-6-             |
| <b>H11-16</b> |  | 36,2382 | 296,197  | -22,6558 | 40,0081  | 359,0486 | InChI=1S/C12H7N3O/c16-12-9(14-10-6-15(10)12)3-1-2-7-8-4-5-13-11(7)8/h1-6,13H/b3-1-,7-2-                   |
| <b>H-82</b>   |  | 13,7007 | 213,0682 | -5,7623  | 101,7744 | 359,1671 | InChI=1S/C12H7N3O/c16-12-9-3-1-2-7-6-15(7)11(14-12)10-8(9)4-5-13-10/h1-6,13H/b2-1-,9-3+                   |
| <b>C-22</b>   |  | 7,1790  | 129,7094 | -3,3371  | 185,8726 | 359,3948 | InChI=1S/C12H7N3O/c16-12-9-6-10-7(2-1-4-14-15(10)12)8-3-5-13-11(8)9/h1-6,13H                              |
| <b>G1-114</b> |  | 16,7974 | 216,327  | -6,4338  | 107,2498 | 359,5419 | InChI=1S/C12H7N3O/c16-9-3-1-2-7-6-14-12-11(15(9)12)10-8(7)4-5-13-10/h1-6,13H/b3-1-,7-2+                   |
| <b>H11-65</b> |  | 13,0264 | 194,3278 | -4,4929  | 125,5378 | 359,6479 | InChI=1S/C12H7N3O/c16-11-6-9-12-7(4-5-13-12)8-2-1-3-10(14-8)15(9)11/h1-6,13H                              |
| <b>s11-34</b> |  | 19,1708 | 201,7029 | -9,1767  | 119,7062 | 359,8846 | InChI=1S/C12H7N3O/c16-12-11-10-7(4-5-13-10)2-1-3-8(14-11)9-6-15(9)12/h1-6,13H/b2-1-,3-1-,7-2-,8-3-,11-10+ |
| <b>B-196</b>  |  | 22,3495 | 224,8795 | -13,4467 | 121,4834 | 359,9655 | InChI=1S/C12H7N3O/c16-12-11-9(6-14-11)15(12)5-1-2-7-8-3-4-13-10(7)8/h1-6,13H/b5-1-,7-2-                   |
| <b>q-38</b>   |  | 7,9099  | 203,0362 | -5,1618  | 135,7849 | 360,1542 | InChI=1S/C12H7N3O/c16-12-8-6-14-11-9(15(11)12)3-1-2-7-4-5-13-10(7)8/h1-6,13H/b2-1-,3-1-,7-29,9-3-,10-8+   |
| <b>o-160</b>  |  | 18,3373 | 192,6342 | -4,6111  | 130,7229 | 360,1678 | InChI=1S/C12H7N3O/c16-12-7-2-1-5-15(12)9-3-4-13-11(9)10-8(6-7)14-10/h1-6,13H/b8-6+                        |

|               |                                                                                                                                        |         |          |          |          |          |                                                                                                           |
|---------------|----------------------------------------------------------------------------------------------------------------------------------------|---------|----------|----------|----------|----------|-----------------------------------------------------------------------------------------------------------|
| <b>o-200</b>  |                                                       | 37.3962 | 93.5428  | -3.6922  | 142.5601 | 360.2204 | InChI=1S/C12H7N3O/c16-12-8-6-7-2-1-5-15(12)9-3-4-13-11(9)14-10(7)8/h1-6,13H/b5-1-,7-2+                    |
| <b>X-41</b>   | <br>C <sub>12</sub> H <sub>7</sub> N <sub>3</sub> O   | 12.4474 | 145.9632 | -4.1576  | 177.3891 | 360.3239 | InChI=1S/C12H7N3O/c16-12-9-10-8(3-5-13-10)7-2-1-4-14-11(9)15(12)6-7/h1-6,13H/b2-1-,14-4-                  |
| <b>A2-35</b>  | <br>C <sub>12</sub> H <sub>7</sub> N <sub>3</sub> O   | 10.4039 | 216.2386 | -0.6621  | 98.691   | 360.75   | InChI=1S/C12H7N3O/c16-12-9-6-10-7(2-1-4-13-9)8-3-5-14-11(8)15(10)12/h1-6,14H/b2-1-,4-1-,7-2-,13-4-,13-9+  |
| <b>H11-48</b> | <br>C <sub>12</sub> H <sub>7</sub> N <sub>3</sub> O   | 6.0277  | 334.9954 | -1.0624  | -2.2999  | 360.8441 | InChI=1S/C12H7N3O/c16-12-10-6-7-2-1-3-9(14-7)8-4-5-13-11(8)15(10)12/h1-6,13H/b10-6-                       |
| <b>x4-1</b>   | <br>C <sub>12</sub> H <sub>7</sub> N <sub>3</sub> O   | 9.3239  | 228.0712 | -4.9477  | 107.2163 | 361.3278 | InChI=1S/C12H7N3O/c16-9-6-14-15-8-3-1-2-7-4-5-13-11(7)10(9)12(8)15/h1-6,13H/b2-1-,3-1-,7-2-,8-3+,11-10+   |
| <b>F-14</b>   | <br>C <sub>12</sub> H <sub>7</sub> N <sub>3</sub> O   | 13.9031 | 150.8384 | -3.7384  | 166.2317 | 361.4487 | InChI=1S/C12H7N3O/c16-11-8-3-1-2-7-6-10(11)15(7)14-12-9(8)4-5-13-12/h1-6H,13,14/b3-1-,7-2+                |
| <b>j-20</b>   | <br>C <sub>12</sub> H <sub>7</sub> N <sub>3</sub> O   | 52.0822 | 248.7604 | -28.1838 | 78.4327  | 361.4616 | InChI=1S/C12H7N3O/c16-10-6-9-8(3-5-14-9)13-4-1-2-7-11-12(7)15(10)11/h1-6,14H/b4-1-,7-2-,9-6-,13-8+        |
| <b>I-14</b>   | <br>C <sub>12</sub> H <sub>7</sub> N <sub>3</sub> O   | 16.2538 | 159.1262 | -7.5876  | 160.0194 | 361.5319 | InChI=1S/C12H7N3O/c16-10-6-9-8-2-1-4-13-7-3-5-14-11(7)12(10)15(8)9/h1-6,14H/b4-1-,8-2-,12-11+,13-7+       |
| <b>o-76</b>   | <br>C <sub>12</sub> H <sub>7</sub> N <sub>3</sub> O   | 16.3222 | 223.0386 | -5.4969  | 90.0877  | 361.5466 | InChI=1S/C12H7N3O/c16-10-6-9-12-8(3-4-13-12)15(9)5-1-2-7-11(10)14-7/h1-6,13H/b5-1-,7-2+,9-6-              |
| <b>x4-17</b>  | <br>C <sub>12</sub> H <sub>7</sub> N <sub>3</sub> O  | 5.7543  | 181.7657 | -2.2622  | 147.1579 | 361.5525 | InChI=1S/C12H7N3O/c16-11-8-3-1-2-7-4-5-13-10(7)9(11)12-14-6-15(8)12/h1-6,13H/b2-1-,8-3+                   |
| <b>B-89</b>   | <br>C <sub>12</sub> H <sub>7</sub> N <sub>3</sub> O | 19.8214 | 193.0310 | -13.0852 | 149.5271 | 361.6426 | InChI=1S/C12H7N3O/c16-12-9-6-10(14-12)15(9)5-1-2-7-8-3-4-13-11(7)8/h1-6,13H/b5-1-,7-2-                    |
| <b>H11-35</b> | <br>C <sub>12</sub> H <sub>7</sub> N <sub>3</sub> O | 8.4306  | 118.5863 | -3.6794  | 200.3334 | 362.1659 | InChI=1S/C12H7N3O/c16-12-8-6-10-7(4-5-13-10)11-3-1-2-9(8)14-15(11)12/h1-6,13H                             |
| <b>n-95</b>   | <br>C <sub>12</sub> H <sub>7</sub> N <sub>3</sub> O | 7.908   | 171.4089 | -3.2122  | 154.4457 | 362.2157 | InChI=1S/C12H7N3O/c16-12-8(6-14-12)11-7-2-1-5-15(11)9-3-4-13-10(7)9/h1-6,13H/b11-8+                       |
| <b>q11-52</b> | <br>C <sub>12</sub> H <sub>7</sub> N <sub>3</sub> O | 7.9409  | 197.7129 | -5.0617  | 140.5474 | 362.5136 | InChI=1S/C12H7N3O/c16-12-11-10-7(4-5-13-10)2-1-3-8-9(6-14-11)15(8)12/h1-6,13H/b2-1-,3-1-,7-2?,8-3-,11-10- |
| <b>q-12</b>   | <br>C <sub>12</sub> H <sub>7</sub> N <sub>3</sub> O | 21.827  | 257.3791 | -12.4492 | 52.9452  | 362.5401 | InChI=1S/C12H7N3O/c16-11-8-3-1-2-7-4-5-13-10(7)9-6-15(9)12(11)14-8/h1-6,13H/b2-1-,8-3-                    |
| <b>p1-45</b>  | <br>C <sub>12</sub> H <sub>7</sub> N <sub>3</sub> O | 20.6389 | 168.0479 | -3.6582  | 149.8415 | 362.6076 | InChI=1S/C12H7N3O/c16-10-3-1-2-7-4-5-13-11(7)8-6-9(10)15-12(8)14-15/h1-6,13H/b3-1-,7-2-,11-8-             |
| <b>o-241</b>  | <br>C <sub>12</sub> H <sub>7</sub> N <sub>3</sub> O | 25.6755 | 187.3657 | -4.841   | 140.9863 | 363.208  | InChI=1S/C12H7N3O/c16-10-6-7-11-8(14-11)2-1-5-15(10)9-3-4-13-12(7)9/h1-6,13H/b5-1-,8-2+                   |
| <b>B-82</b>   | <br>C <sub>12</sub> H <sub>7</sub> N <sub>3</sub> O | 9.4375  | 65.5313  | -5.1913  | 248.0615 | 364.3133 | InChI=1S/C12H7N3O/c16-11-9-6-10(11)15-5-1-2-8(14-9)7-3-4-13-12(7)15/h1-6,13H/b14-9+                       |
| <b>I-35</b>   | <br>C <sub>12</sub> H <sub>7</sub> N <sub>3</sub> O | 11.7233 | 214.5309 | 1.3352   | 93.9193  | 364.3158 | InChI=1S/C12H7N3O/c16-12-7-6-9-10(12)11-8(2-4-14-11)15(9)5-1-3-13-7/h1-6,14H/b5-1-,13-3-                  |

|               |  |         |          |          |          |          |                                                                                                         |
|---------------|--|---------|----------|----------|----------|----------|---------------------------------------------------------------------------------------------------------|
| <b>q-36</b>   |  | 15.4264 | 217.9696 | -7.0823  | 118.0978 | 364.7496 | InChI=1S/C12H7N3O/c16-12-9-6-8(11-14-15(11)12)3-1-2-7-4-5-13-10(7)9/h1-6,13H/b2-1-,3-1-,7-2?,8-3+,10-9- |
| <b>H11-44</b> |  | 9.568   | 108.0083 | -3.784   | 209.3507 | 364.9065 | InChI=1S/C12H7N3O/c16-12-9-6-14-10-3-1-2-7(9)8-4-5-13-11(8)15(10)12/h1-6,13H/b2-1-,3-1-,7-2-,10-3-      |
| <b>q11-41</b> |  | 16.049  | 216.3937 | -5.6033  | 106.6339 | 365.0018 | InChI=1S/C12H7N3O/c16-10-6-9-8(10)3-1-2-7-4-5-13-11(7)12-14-15(9)12/h1-6,13H/b2-1-,3-1-,7-2-,10-3-      |
| <b>q11-23</b> |  | 7.6519  | 115.3346 | -2.871   | 203.023  | 365.0165 | InChI=1S/C12H7N3O/c16-11-8-6-15-9(11)3-1-2-7-4-5-13-10(7)12(15)14-8/h1-6,13H/b2-1-,9-3-                 |
| <b>B-34</b>   |  | 12.0145 | 78.8127  | -3.8106  | 234.7978 | 365.2996 | InChI=1S/C12H7N3O/c16-10-6-9-12-11-8(3-4-13-11)7(10)2-1-5-15(9)14-12/h1-6,13H/b5-1-,7-2-                |
| <b>G-75</b>   |  | 16.3341 | 217.3653 | -6.8775  | 122.052  | 365.3625 | InChI=1S/C10H6N2/c1-2-6-7-4-5-11-10(7)12-8(3-1)9(6)12/h1-5,11H                                          |
| <b>X22-29</b> |  | 19.6855 | 241.6703 | -10.4099 | 103.9702 | 365.901  | InChI=1S/C12H7N3O/c16-12-11-7-2-1-4-13-8-3-5-14-10(8)9(6-7)15(11)12/h1-6,14H/b2-1-,13-4-                |
| <b>H1-31</b>  |  | 33.0881 | 294.2946 | -22.2101 | 45.0104  | 366.1205 | InChI=1S/C12H7N3O/c16-10(12-9-6-15(9)14-12)3-1-2-7-8-4-5-13-11(7)8/h1-6,13H/b3-1-,7-2-                  |
| <b>s12-20</b> |  | 31.8228 | 256.098  | -14.339  | 66.1397  | 366.1429 | InChI=1S/C12H7N3O/c16-12-10-8-3-1-2-7-4-5-13-9(7)6-15(14-8)11(10)12/h1-6,13H/b3-1-,7-2-,9-6-            |
| <b>G-67</b>   |  | 9.6824  | 200.1228 | -4.4344  | 140.1312 | 366.4059 | InChI=1S/C12H7N3O/c16-12-10-7(4-5-13-10)8-2-1-3-9-11(8)15(9)6-14-12/h1-6,13H/b14-6-                     |
| <b>x4-42</b>  |  | 35.1516 | 276.8718 | -18.756  | 57.1519  | 366.4869 | InChI=1S/C12H7N3O/c16-12(15-6-14-15)10-8-3-1-2-7-4-5-13-11(7)9(8)10/h1-6,13H                            |
| <b>A-166</b>  |  | 27.4867 | 238.6362 | -9.4751  | 89.6954  | 366.692  | InChI=1S/C12H7N3O/c16-12-9-10-8(3-4-13-10)7-2-1-5-15(11)9(12)14-6-7/h1-6,13H                            |
| <b>H1-106</b> |  | 37.9115 | 238.0814 | -3.5103  | 80.7127  | 366.8203 | InChI=1S/C12H7N3O/c16-10-3-1-2-7-6-9(12-14-15(10)12)11-8(7)4-5-13-11/h1-6,13H/b3-1-,7-2+                |
| <b>G1-32</b>  |  | 3.6964  | 368.8892 | -1.9363  | -10.49   | 366.9746 | InChI=1S/C12H7N3O/c16-9-3-1-2-7-8-4-5-13-11(8)10(7)12(9)15-6-14-15/h1-6,13H                             |
| <b>G1-111</b> |  | 39.1638 | 301.6379 | -20.1433 | 38.0727  | 367.0445 | InChI=1S/C12H7N3O/c16-10(15-9-6-14-12(9)15)3-1-2-7-8-4-5-13-11(7)8/h1-6,13H/b3-1-,7-2-                  |
| <b>o-184</b>  |  | 21.9403 | 241.2134 | -13.9223 | 77.8546  | 367.0457 | InChI=1S/C12H7N3O/c16-12-7-6-8(7)14-10-2-1-5-15(10)9-3-4-13-11(9)12/h1-6,13H/b14-8-                     |
| <b>i-96</b>   |  | 8.7106  | 78.2311  | -3.2675  | 234.5267 | 367.0629 | InChI=1S/C12H7N3O/c16-12-7-6-9(12)15-5-1-3-13-10(7)11-8(15)2-4-14-11/h1-6,14H/b5-1-,13-3-               |
| <b>G-25</b>   |  | 8.3426  | 343.5923 | -5.2559  | 14.4754  | 367.2447 | InChI=1S/C12H7N3O/c16-12-10-3-1-2-7-8-4-5-13-11(8)9(7)6-14-15(10)12/h1-6,13H/b2-1-,10-3-,14-6-          |
| <b>H-119</b>  |  | 8.9371  | 166.9977 | -5.4604  | 161.7183 | 367.5905 | InChI=1S/C12H7N3O/c16-12-11-10-9(4-5-13-10)7-2-1-3-8(6-7)15(12)14-11/h1-6,13H                           |

|                |  |         |          |          |          |          |                                                                                                          |
|----------------|--|---------|----------|----------|----------|----------|----------------------------------------------------------------------------------------------------------|
| <b>o-90</b>    |  | 24.7623 | 261.9209 | -13.7079 | 51.5598  | 368.1457 | InChI=1S/C12H7N3O/c16-12-10-8-6-7(8)2-1-5-15(12)9-3-4-13-11(9)14-10/h1-6,13H/b5-1-,7-2-                  |
| <b>n-155</b>   |  | 9.6764  | 42.55    | -3.2076  | 276.531  | 368.3403 | InChI=1S/C12H7N3O/c16-12-7-2-1-5-15-8-3-4-13-11(8)10(12)9(15)6-14-7/h1-6,13H/b5-1-,7-2-                  |
| <b>D-1</b>     |  | 11.8480 | 359.8022 | -3.5368  | -4.8238  | 368.3830 | InChI=1S/C12H7N3O/c16-10-6-8(10)12-11-7(3-5-13-11)9-2-1-4-14-15(9)12/h1-6,13H                            |
| <b>E-57</b>    |  | 6.7918  | 306.9802 | -3.6346  | 44.7111  | 368.5699 | InChI=1S/C12H7N3O/c16-12-10-3-1-2-8-7-4-5-13-11(7)9(14-8)6-15(10)12/h1-6,13H/b2-1-,9-6-,10-3-            |
| <b>I-88</b>    |  | 33.2745 | 233.3379 | -12.0615 | 90.5583  | 368.5794 | InChI=1S/C12H7N3O/c16-12-9-7-6-13-3-1-5-15(11)9(12)8-2-4-14-10(7)8/h1-6,14H/b5-1-,7-6-,13-3-             |
| <b>o-53</b>    |  | 6.8147  | 76.7257  | -2.7153  | 242.2632 | 368.6395 | InChI=1S/C12H7N3O/c16-12-8-6-10(12)15-5-1-2-7(14-8)11-9(15)3-4-13-11/h1-6,13H/b14-8+                     |
| <b>H11-127</b> |  | 14.1733 | 239.5553 | -8.3514  | 82.1033  | 368.7102 | InChI=1S/C12H7N3O/c16-12-8-2-1-3-9(12)14-15-6-10(15)11-7(8)4-5-13-11/h1-6,13H/b4-9-                      |
| <b>q-52</b>    |  | 2.4677  | 378.3159 | -2.2351  | -7.1     | 368.9684 | InChI=1S/C12H7N3O/c16-12-9-3-1-2-7-4-5-13-10(7)8-6-14-11(8)15(9)12/h1-6,13H/b2-1-,9-3-                   |
| <b>B-53</b>    |  | 6.6415  | 98.0687  | -2.7796  | 231.2525 | 369.3214 | InChI=1S/C12H7N3O/c16-9-6-10-14-11(9)7-2-1-5-15(10)12-8(7)3-4-13-12/h1-6,13H                             |
| <b>o-26</b>    |  | 29.9898 | 82.4332  | -0.903   | 182.6085 | 369.5068 | InChI=1S/C12H7N3O/c16-11-7-2-1-5-15-10-3-4-13-9(10)6-8(7)14-12(11)15/h1-6,13H                            |
| <b>H-133</b>   |  | 2.3951  | 305.9491 | -1.4391  | 48.3945  | 369.5692 | InChI=1S/C12H7N3O/c16-12-11-14-8-3-1-2-7(6-8)9-4-5-13-10(9)15(11)12/h1-6,13H/b4-11-                      |
| <b>H-22</b>    |  | 10.7236 | 110.7754 | -5.053   | 214.8156 | 369.728  | InChI=1S/C12H7N3O/c16-12-7-2-1-3-9-8-4-5-13-11(8)15(12)10(6-7)14-9/h1-6,13H/b2-1-,3-1-,7-2-,9-3-         |
| <b>o-49</b>    |  | 6.0466  | 34.8679  | -2.2957  | 285.5235 | 370.1044 | InChI=1S/C12H7N3O/c16-12-9-6-7-2-1-5-15(9)8-3-4-13-10(8)11(12)14-7/h1-6,13H                              |
| <b>B-11</b>    |  | 41.2144 | 197.1890 | -17.7926 | 125.0926 | 370.1200 | InChI=1S/C12H7N3O/c16-10-6-9(10)15-5-1-2-8-7-3-4-13-11(7)12(15)14-8/h1-6,13H                             |
| <b>E-54</b>    |  | 13.4086 | 207.011  | -4.9089  | 117.0614 | 370.3933 | InChI=1S/C12H7N3O/c16-12-9-3-1-2-8(14-12)7-4-5-13-11(7)10-6-15(9)10/h1-6,13H                             |
| <b>X22-24</b>  |  | 18.059  | 222.3667 | -10.5004 | 131.4791 | 370.4035 | InChI=1S/C12H7N3O/c16-12-11-7-2-1-4-13-9-3-5-14-10(9)8(7)6-15(11)12/h1-6,14H/b2-1-,13-4+                 |
| <b>s11-48</b>  |  | 13.7836 | 214.2104 | -5.8742  | 134.0995 | 370.6094 | InChI=1S/C12H7N3O/c16-12-8-3-1-2-7-4-5-13-10(7)11-9(6-14-8)15(11)12/h1-6,13H/b2-1-,3-1-,7-2-,8-3-,11-10+ |
| <b>n-53</b>    |  | 28.0244 | 235.953  | -10.2332 | 95.4831  | 370.8986 | InChI=1S/C12H7N3O/c16-12-10-11(12)15-5-1-2-7(6-14-10)9-8(15)3-4-13-9/h1-6,13H/b14-6-                     |
| <b>H11-136</b> |  | 40.3957 | 182.6014 | -18.6435 | 141.8413 | 370.9652 | InChI=1S/C12H7N3O/c16-10-6-9(10)15-8-2-1-3-11(15)14-12-7(8)4-5-13-12/h1-6H,13(14)                        |

|               |                                                                                     |         |          |          |          |          |                                                                                                               |
|---------------|-------------------------------------------------------------------------------------|---------|----------|----------|----------|----------|---------------------------------------------------------------------------------------------------------------|
| <b>X22-9</b>  | 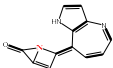   | 14.7307 | 300.1629 | -9.418   | 61.0408  | 370.9844 | InChI=1S/C12H7N3O/c16-12-10-6-9(15(10)12)7-2-1-4-13-8-3-5-14-11(7)8/h1-6,14H/b9-7-                            |
| <b>p-15</b>   |    | 21.1393 | 165.9135 | -3.5988  | 160.4256 | 371.0786 | InChI=1S/C12H7N3O/c16-11-8-3-1-2-7-4-5-13-9(7)6-10(11)15-12(8)14-15/h1-6,13H/b2-1-,8-3+,10-6+                 |
| <b>A1-29</b>  |    | 28.7316 | 203.1437 | -6.0521  | 107.4882 | 371.1511 | InChI=1S/C12H7N3O/c16-12-10-9-6-13-4-1-2-8(15(9)12)7-3-5-14-11(7)10/h1-6,14H/b2-1-,4-1-,8-2-,9-6-,13-4-,13-6- |
| <b>H-39</b>   |    | 9.2966  | 97.8013  | -2.0925  | 213.9225 | 371.3012 | InChI=1S/C12H7N3O/c16-10-6-7-2-1-3-8-9-4-5-13-12(9)15(7)14-11(8)10/h1-6,13H/b2-1-,8-3-                        |
| <b>n-161</b>  |    | 14.4154 | 123.8091 | -3.327   | 191.502  | 371.5831 | InChI=1S/C12H7N3O/c16-12-7-2-1-5-15-9-3-4-13-11(9)10(7)8(12)6-14-15/h1-6,13H/b5-1-,7-2+                       |
| <b>B-69</b>   |    | 11.4242 | 125.3384 | -3.9610  | 190.8051 | 371.6340 | InChI=1S/C12H7N3O/c16-11-9-6-10(11)14-15-5-1-2-7(9)8-3-4-13-12(8)15/h1-6,13H/b14-10+                          |
| <b>H1-29</b>  |    | 17.5339 | 185.5619 | -12.4778 | 128.6816 | 371.6371 | InChI=1S/C12H7N3O/c16-10-3-1-2-7-8-4-5-13-11(8)12(10)14-15-6-9(7)15/h1-6,13H/b3-1-,7-2+                       |
| <b>H1-48</b>  |    | 32.5244 | 236.9127 | -18.4822 | 78.5267  | 371.6996 | InChI=1S/C12H7N3O/c16-10-3-1-2-7-8-4-5-13-11(8)14-12(10)15-6-9(7)15/h1-6,13H/b3-1-,7-2-                       |
| <b>E-8</b>    |    | 4.1293  | 349.9685 | -0.7266  | -2.38    | 371.8685 | InChI=1S/C12H7N3O/c16-11-7-2-1-3-10-8-4-5-13-12(8)15(14-10)6-9(7)11/h1-6,13H/b3-1-,7-2+,9-6+                  |
| <b>p1-47</b>  |   | 24.5875 | 147.461  | -10.1    | 193.7638 | 371.9059 | InChI=1S/C12H7N3O/c16-8-3-1-2-7-4-5-13-11(7)10-9(6-8)15-12(10)14-15/h1-6,13H/b3-1-,7-2-,9-6+,11-10-           |
| <b>q1-17</b>  |  | 24.0602 | 145.3116 | -9.9427  | 196.7868 | 371.9232 | InChI=1S/C12H7N3O/c16-10-6-8-9(15-12(8)14-15)3-1-2-7-4-5-13-11(7)10/h1-6,13H/b2-1-,8-6+,9-3+                  |
| <b>A1-40</b>  |  | 32.0292 | 260.58   | -14.8056 | 70.0872  | 372.1395 | InChI=1S/C12H7N3O/c16-11-8-6-13-4-1-2-9-7-3-5-14-12(7)15(9)10(8)11/h1-6,14H/b4-1-,9-2-,13-6-                  |
| <b>G1-100</b> |  | 16.6557 | 272.0284 | -5.5065  | 41.4828  | 372.2318 | InChI=1S/C12H7N3O/c16-9-3-1-2-7-6-14-12(9)15(12)11-8(7)4-5-13-11/h1-6,13H/b3-1-,7-2+                          |
| <b>xS-31</b>  |  | 12.8003 | 277.0201 | -6.1549  | 54.5863  | 372.63   | InChI=1S/C12H7N3O/c16-10-8-3-1-2-7-4-5-13-11(7)14-12-9(10)15(12)6-8/h1-6H,(H,13,14)/b3-1-,7-2-                |
| <b>p1-33</b>  |  | 16.0141 | 214.9551 | -8.2407  | 128.1811 | 372.7541 | InChI=1S/C12H7N3O/c16-8-3-1-2-7-4-5-13-10(7)11-9(6-8)12-14-15(11)12/h1-6,13H/b3-1-,7-2-,9-6+,11-10-           |
| <b>H11-25</b> |  | 4.1354  | 331.8086 | -1.6928  | 28.7373  | 372.7771 | InChI=1S/C12H7N3O/c16-12-9-6-7(8-4-5-13-11(8)9)2-1-3-10-14-15(10)12/h1-6,13H/b3-1-,7-2+                       |
| <b>B-48</b>   |  | 7.9979  | 105.6074 | -2.4001  | 227.4461 | 372.8104 | InChI=1S/C12H7N3O/c16-10-6-9-7-2-1-5-15(10)12(14-9)11-8(7)3-4-13-11/h1-6,13H/b5-1-,7-2-                       |
| <b>i-20</b>   |  | 15.5268 | 202.5069 | -9.3695  | 116.0623 | 372.8175 | InChI=1S/C12H7N3O/c16-12-7-2-1-4-13-8-3-5-14-10(8)11(12)15-6-9(7)15/h1-6,14H/b4-1-,7-2-,11-10-,13-8-          |
| <b>o-128</b>  |  | 3.9621  | 347.8911 | -0.6529  | -1.45    | 372.8191 | InChI=1S/C12H7N3O/c16-12-7-2-1-5-15-10-3-4-13-11(10)9(14-15)6-8(7)12/h1-6,13H/b5-1-,7-2+,8-6+                 |

|               |                                                                                     |         |          |          |          |          |                                                                                                                 |
|---------------|-------------------------------------------------------------------------------------|---------|----------|----------|----------|----------|-----------------------------------------------------------------------------------------------------------------|
| <b>H-11</b>   |    | 7.7682  | 101.0018 | -1.8472  | 217.5197 | 373.1574 | InChI=1S/C12H7N3O/c16-11-7-2-1-3-8-9-4-5-13-12(9)15(6-7)14-10(8)11/h1-6,13H                                     |
|               | $C_{12}H_7N_3O$                                                                     |         |          |          |          |          |                                                                                                                 |
| <b>H-92</b>   |    | 18.759  | 215.631  | -12.3191 | 123.0106 | 373.4137 | InChI=1S/C12H7N3O/c16-12-10-9(4-5-13-10)7-2-1-3-8(6-7)11-14-15(11)12/h1-6,13H                                   |
|               | $C_{12}H_7N_3O$                                                                     |         |          |          |          |          |                                                                                                                 |
| <b>o-151</b>  |    | 10.2508 | 108.5215 | -2.5487  | 205.4285 | 373.4321 | InChI=1S/C12H7N3O/c16-10-6-9-12-11-8(3-4-13-11)15(9)5-1-2-7(10)14-12/h1-6,13H/b5-1-,7-2+                        |
|               | $C_{12}H_7N_3O$                                                                     |         |          |          |          |          |                                                                                                                 |
| <b>X-43</b>   |    | 26.8871 | 351.7298 | -16.9523 | 7.7793   | 373.5181 | InChI=1S/C12H7N3O/c16-12-10-11(15(10)12)14-4-1-2-7-6-9-8(7)3-5-13-9/h1-6,13H/b2-1-,14-4+                        |
|               | $C_{12}H_7N_3O$                                                                     |         |          |          |          |          |                                                                                                                 |
| <b>o-168</b>  |    | 10.7184 | 203.1599 | -1.2724  | 108.7099 | 373.5567 | InChI=1S/C12H7N3O/c16-12-7-2-1-5-15-8-3-4-13-10(8)11(14-12)9(15)6-7/h1-6,13H                                    |
|               | $C_{12}H_7N_3O$                                                                     |         |          |          |          |          |                                                                                                                 |
| <b>A-89</b>   |    | 3.2826  | 303.0629 | -2.9036  | 67.9105  | 373.5658 | InChI=1S/C12H7N3O/c16-12-8-2-1-5-15(12)11(9-6-14-9)10-7(8)3-4-13-10/h1-6,13H/b11-9-                             |
|               | $C_{12}H_7N_3O$                                                                     |         |          |          |          |          |                                                                                                                 |
| <b>A-144</b>  |    | 3.2847  | 303.062  | -2.9043  | 67.9121  | 373.5658 | InChI=1S/C12H7N3O/c16-12-8-2-1-5-15(12)11(9-6-14-9)10-7(8)3-4-13-10/h1-6,13H/b11-9+                             |
|               | $C_{12}H_7N_3O$                                                                     |         |          |          |          |          |                                                                                                                 |
| <b>p1-32</b>  |    | 12.7142 | 181.5779 | -8.2325  | 176.9694 | 373.7968 | InChI=1S/C12H7N3O/c16-10-3-1-2-7-4-5-13-11(7)9-6-8-12(14-8)15(9)10/h1-6,13H/b3-1-,7-2-,11-9+                    |
|               | $C_{12}H_7N_3O$                                                                     |         |          |          |          |          |                                                                                                                 |
| <b>p1-17</b>  |    | 15.7571 | 184.3735 | -8.4936  | 163.1543 | 373.8377 | InChI=1S/C12H7N3O/c16-9-3-1-2-7-4-5-13-11(7)10-8-6(15)14-12(8)10/h1-6,13H/b3-1-,7-2-,11-10+                     |
|               | $C_{12}H_7N_3O$                                                                     |         |          |          |          |          |                                                                                                                 |
| <b>i-22</b>   |   | 12.3699 | 144.2187 | -8.6058  | 192.0903 | 374.0981 | InChI=1S/C12H7N3O/c16-12-10-9-6-7(15(9)12)2-1-4-13-8-3-5-14-11(8)10/h1-6,14H/b2-1-,4-1-,7-2-,11-10+,13-4-,13-8+ |
|               | $C_{12}H_7N_3O$                                                                     |         |          |          |          |          |                                                                                                                 |
| <b>H1-105</b> |  | 21.1779 | 167.9882 | -2.7615  | 159.696  | 374.2126 | InChI=1S/C12H7N3O/c16-10-3-1-2-7-6-9(10)12-14-15(12)11-8(7)4-5-13-11/h1-6,13H                                   |
|               | $C_{12}H_7N_3O$                                                                     |         |          |          |          |          |                                                                                                                 |
| <b>X22-43</b> |  | 8.7583  | 216.9879 | -7.5247  | 149.3884 | 374.2401 | InChI=1S/C12H7N3O/c16-10-6-9-11-7(10)2-1-4-13-8-3-5-14-12(8)15(9)11/h1-6,14H/b2-1-,13-4-                        |
|               | $C_{12}H_7N_3O$                                                                     |         |          |          |          |          |                                                                                                                 |
| <b>X22-49</b> |  | 9.8106  | 248.2682 | -6.8284  | 116.1364 | 374.3756 | InChI=1S/C12H7N3O/c16-11-7-6-15-9(10(7)11)2-1-4-13-8-3-5-14-12(8)15/h1-6,14H/b2-1-,13-4-                        |
|               | $C_{12}H_7N_3O$                                                                     |         |          |          |          |          |                                                                                                                 |
| <b>X23-28</b> |  | 24.2086 | 246.3291 | -9.9084  | 96.0881  | 374.6283 | InChI=1S/C12H7N3O/c16-12-7-2-1-4-13-8-3-5-14-10(8)11-9(6-7)15(11)12/h1-6,14H/b2-1-,4-1-,7-2-,11-10-,13-4-,13-8- |
|               | $C_{12}H_7N_3O$                                                                     |         |          |          |          |          |                                                                                                                 |
| <b>H11-33</b> |  | 7.4581  | 147.2728 | -3.3255  | 185.5401 | 374.6385 | InChI=1S/C12H7N3O/c16-12-9-6-7-2-1-3-10(9)14-15(12)11-8(7)4-5-13-11/h1-6,13H                                    |
|               | $C_{12}H_7N_3O$                                                                     |         |          |          |          |          |                                                                                                                 |
| <b>E-70</b>   |  | 15.0309 | 229.3004 | -5.0131  | 117.0212 | 374.6747 | InChI=1S/C12H7N3O/c16-12-14-8-2-1-3-10-11(15(10)12)6-9-7(8)4-5-13-9/h1-6,13H/b2-1-,10-3-,11-6-,14-8-            |
|               | $C_{12}H_7N_3O$                                                                     |         |          |          |          |          |                                                                                                                 |
| <b>o-210</b>  |  | 6.9856  | 158.9022 | -2.3393  | 173.9435 | 375.2987 | InChI=1S/C12H7N3O/c16-12-8-6-15-5-1-2-7(10(8)14-12)11-9(15)3-4-13-11/h1-6,13H                                   |
|               | $C_{12}H_7N_3O$                                                                     |         |          |          |          |          |                                                                                                                 |
| <b>o-157</b>  |  | 11.0529 | 252.6149 | -4.6084  | 92.0685  | 375.7524 | InChI=1S/C12H7N3O/c16-12-7-2-1-5-15(12)10-3-4-13-8(10)6-9-11(7)14-9/h1-6,13H/b9-6+                              |
|               | $C_{12}H_7N_3O$                                                                     |         |          |          |          |          |                                                                                                                 |
| <b>X22-53</b> |  | 19.4596 | 232.8245 | -11.2555 | 102.4595 | 375.7914 | InChI=1S/C12H7N3O/c16-12-10-6-8-7(3-5-14-8)13-4-1-2-9-11(12)15(9)10/h1-6,14H/b2-1-,10-6+,13-4+                  |
|               | $C_{12}H_7N_3O$                                                                     |         |          |          |          |          |                                                                                                                 |



|                |                                                                                     |         |          |          |          |          |                                                                                                  |
|----------------|-------------------------------------------------------------------------------------|---------|----------|----------|----------|----------|--------------------------------------------------------------------------------------------------|
| <b>X-35</b>    |    | 8.0975  | 207.2664 | -2.0586  | 139.7433 | 375.8136 | InChI=1S/C12H7N3O/c16-12-10-11-9-8(3-5-14-9)7(6-15(11)12)2-1-4-13-10/h1-6,14H/b2-1-,13-4-        |
| <b>q11-13</b>  |    | 32.3262 | 104.4232 | -1.9383  | 169.2389 | 375.894  | InChI=1S/C12H7N3O/c16-12-9-6-8-3-1-2-7-4-5-13-10(7)11(9)14-15(8)12/h1-6,13H/b2-1-,8-3-           |
| <b>B-20</b>    |    | 10.9926 | 196.8951 | -3.1754  | 128.9184 | 375.9011 | InChI=1S/C12H7N3O/c16-10-6-9-7-2-1-5-15(12(9)14-10)11-8(7)3-4-13-11/h1-6,13H                     |
| <b>G-4</b>     |    | 34.3503 | 306.7886 | -0.6493  | 25.9443  | 375.9638 | InChI=1S/C12H7N3O/c16-12-9(15-6-14-15)3-1-2-7-8-4-5-13-11(8)10(7)12/h1-6,13H                     |
| <b>C-24</b>    |    | 9.9285  | 333.9921 | -6.2759  | 26.6744  | 376.0325 | InChI=1S/C12H7N3O/c16-12-10-6-9-7(2-1-4-14-15(10)12)8-3-5-13-11(8)9/h1-6,13H/b2-1-,10-6-,14-4-   |
| <b>n-202</b>   |    | 3.3104  | 304.3819 | -2.8024  | 69.9947  | 376.0421 | InChI=1S/C12H7N3O/c16-12-7-2-1-5-15(12)9-3-4-13-11(9)10(7)8-6-14-8/h1-6,13H/b10-8+               |
| <b>o-42</b>    |    | 4.2829  | 336.5798 | -1.4156  | 27.9592  | 376.3951 | InChI=1S/C12H7N3O/c16-11-8-6-7-2-1-5-15(7)9-3-4-13-12(9)14-10(8)11/h1-6,13H/b8-6-,14-10+         |
| <b>G1-54</b>   |    | 9.0853  | 101.5378 | -4.2033  | 234.7189 | 376.4993 | InChI=1S/C12H7N3O/c16-10-3-1-2-9-7-4-5-13-11(7)8-6-14-15(9)12(8)10/h1-6,13H                      |
| <b>X-51</b>    |   | 40.7009 | 178.1793 | -13.6208 | 127.4517 | 376.6416 | InChI=1S/C12H7N3O/c16-12-14-4-1-2-7-6-9-11(15(9)12)10-8(7)3-5-13-10/h1-6,13H/b2-1-,14-4+         |
| <b>o-111</b>   |  | 6.8323  | 71.5989  | -3.1054  | 264.3496 | 377.0699 | InChI=1S/C12H7N3O/c16-11-7-2-1-5-15-6-8(11)10(7)14-12-9(15)3-4-13-12/h1-6,13H/b5-1-,7-2-         |
| <b>H11-142</b> |  | 29.2906 | 87.3477  | -0.6664  | 194.6325 | 377.1724 | InChI=1S/C12H7N3O/c16-12-8-6-15-10(3-1-2-9(8)14-15)7-4-5-13-11(7)12/h1-6,13H                     |
| <b>I-78</b>    |  | 30.8332 | 146.5095 | -1.9266  | 131.4504 | 377.2    | InChI=1S/C12H7N3O/c16-9-6-7-10-8(2-4-14-10)15-5-1-3-13-11(7)12(9)15/h1-6,14H                     |
| <b>x4-25</b>   |  | 10.3645 | 210.9421 | -2.1629  | 126.8696 | 377.3435 | InChI=1S/C12H7N3O/c16-12-9-3-1-2-7-4-5-13-10(7)8-6-14-15(9)11(8)12/h1-6,13H/b2-1-,9-3+           |
| <b>H-26</b>    |  | 13.0317 | 161.4802 | -4.5056  | 174.7297 | 377.4772 | InChI=1S/C12H7N3O/c16-12-7-2-1-3-8-9-4-5-13-10(9)15(12)11(8)14-6-7/h1-6,13H/b2-1-,3-1-,7-2-,8-3- |
| <b>A-162</b>   |  | 27.2801 | 243.3722 | -9.1879  | 95.3855  | 377.5027 | InChI=1S/C12H7N3O/c16-12-9-10-7(3-4-13-10)8-2-1-5-15(6-14-8)11(9)12/h1-6,13H                     |
| <b>H1-17</b>   |  | 24.1073 | 230.853  | -18.0462 | 97.4676  | 377.6856 | InChI=1S/C12H7N3O/c16-9-3-1-2-8(7-4-5-13-11(7)9)12-14-10-6-15(10)12/h1-6,13H                     |
| <b>X-32</b>    |  | 9.5610  | 307.7570 | -5.8589  | 52.9577  | 377.9733 | InChI=1S/C12H7N3O/c16-12-11-9-6-7(2-1-4-14-15(11)12)8-3-5-13-10(8)9/h1-6,13H/b2-1-,11-9+,14-4-   |
| <b>x9-44</b>   |  | 6.0257  | 327.4753 | -2.1886  | 26.0059  | 378.4639 | InChI=1S/C12H7N3O/c16-12-9-7(4-5-13-9)2-1-3-8-11-10(12)14-6-15(8)11/h1-6,13H/b2-1-,8-3+          |
| <b>k-27</b>    |  | 9.0743  | 181.696  | -6.6891  | 174.533  | 378.6925 | InChI=1S/C12H7N3O/c16-9-6-8-12-10(9)11-7(2-4-14-11)13-3-1-5-15(8)12/h1-6,14H/b5-1-,13-3+         |

|               |                                                                                     |          |           |           |           |           |                                                                                                               |
|---------------|-------------------------------------------------------------------------------------|----------|-----------|-----------|-----------|-----------|---------------------------------------------------------------------------------------------------------------|
| <b>G-51</b>   |    | 23, 8946 | 217, 9301 | -7, 3242  | 126, 2462 | 378, 8251 | InChI=1S/C12H7N3O/c16-12-10-8-3-1-2-7(15(10)12)6-14-11-9(8)4-5-13-11/h1-6, 13H/h14-6+                         |
|               | $C_{12}H_7N_3O$                                                                     |          |           |           |           |           |                                                                                                               |
| <b>x7-15</b>  |    | 18, 2071 | 186, 3008 | -7, 3792  | 158, 2424 | 379, 2397 | InChI=1S/C12H7N3O/c16-9-3-1-2-7-4-5-13-10(7)12-11-8(9)6-14-15(11)12/h1-6, 13H/h3-1-, 7-2-, 12-10-             |
|               | $C_{12}H_7N_3O$                                                                     |          |           |           |           |           |                                                                                                               |
| <b>q1-58</b>  |    | 38, 9115 | 233, 0783 | -26, 5945 | 92, 9067  | 379, 2409 | InChI=1S/C12H7N3O/c16-11-10-7(4-5-13-10)2-1-3-8-6-9(8)15-12(11)14-15/h1-6, 13H/h2-1-, 8-3-                    |
|               | $C_{12}H_7N_3O$                                                                     |          |           |           |           |           |                                                                                                               |
| <b>B-47</b>   |    | 9, 3124  | 108, 5350 | -2, 9316  | 219, 3928 | 379, 2905 | InChI=1S/C12H7N3O/c16-10-6-9-7-2-1-5-15(12(10)14-9)11-8(7)3-4-13-11/h1-6, 13H                                 |
|               | $C_{12}H_7N_3O$                                                                     |          |           |           |           |           |                                                                                                               |
| <b>G1-8</b>   |    | 10, 2334 | 146, 4419 | -2, 3512  | 195, 8886 | 379, 3802 | InChI=1S/C12H7N3O/c16-10-3-1-2-8-7-4-5-13-12(7)11(10)9-6-14-15(8)9/h1-6, 13H/h3-1-, 8-2-                      |
|               | $C_{12}H_7N_3O$                                                                     |          |           |           |           |           |                                                                                                               |
| <b>G1-61</b>  |    | 10, 2352 | 146, 3976 | -2, 3533  | 195, 9353 | 379, 3802 | InChI=1S/C12H7N3O/c16-10-3-1-2-8-7-4-5-13-12(7)11(10)9-6-14-15(8)9/h1-6, 13H/h3-1-, 8-2-                      |
|               | $C_{12}H_7N_3O$                                                                     |          |           |           |           |           |                                                                                                               |
| <b>o-186</b>  |    | 4, 7682  | 79, 6515  | -1, 9862  | 261, 9724 | 379, 6236 | InChI=1S/C12H7N3O/c16-12-7-6-10-14-8(7)2-1-5-15(10)9-3-4-13-11(9)12/h1-6, 13H                                 |
|               | $C_{12}H_7N_3O$                                                                     |          |           |           |           |           |                                                                                                               |
| <b>q1-51</b>  |    | 19, 8475 | 151, 5249 | -4, 6765  | 179, 909  | 379, 6393 | InChI=1S/C12H7N3O/c16-11-9-6-8(12-14-15(9)12)3-1-2-7-4-5-13-10(7)11/h1-6, 13H/h2-1-, 8-3+                     |
|               | $C_{12}H_7N_3O$                                                                     |          |           |           |           |           |                                                                                                               |
| <b>n-41</b>   |    | 41, 5621 | 301, 4429 | -18, 6991 | 37, 8313  | 379, 8706 | InChI=1S/C12H7N3O/c16-11-9-7(6-14-10(9)11)2-1-5-15-8-3-4-13-12(8)15/h1-6, 13H/h5-1-, 7-2+                     |
|               | $C_{12}H_7N_3O$                                                                     |          |           |           |           |           |                                                                                                               |
| <b>s11-13</b> |   | 6, 4836  | 132, 8394 | -3, 74    | 224, 8715 | 379, 8864 | InChI=1S/C12H7N3O/c16-12-8-6-9-11-7(4-5-13-11)2-1-3-10(14-8)15(9)12/h1-6, 13H/h2-1-, 3-1-, 7-2-, 10-3-, 11-9+ |
|               | $C_{12}H_7N_3O$                                                                     |          |           |           |           |           |                                                                                                               |
| <b>o-154</b>  |  | 10, 7415 | 186, 4911 | -1, 3167  | 139, 0622 | 379, 9356 | InChI=1S/C12H7N3O/c16-10-6-7-11-9(3-4-13-11)15-5-1-2-8(10)14-12(7)15/h1-6, 13H                                |
|               | $C_{12}H_7N_3O$                                                                     |          |           |           |           |           |                                                                                                               |
| <b>q-32</b>   |  | 20, 5237 | 171, 7874 | -2, 2849  | 159, 7858 | 380, 0552 | InChI=1S/C12H7N3O/c16-12-8-6-10-14-15(10)9(12)3-1-2-7-4-5-13-11(7)8/h1-6, 13H/h2-1-, 9-3+                     |
|               | $C_{12}H_7N_3O$                                                                     |          |           |           |           |           |                                                                                                               |
| <b>k-20</b>   |  | 31, 7332 | 203, 2749 | -12, 9333 | 136, 3011 | 380, 2208 | InChI=1S/C12H7N3O/c16-12-9-7-6-15(11(9)12)5-1-3-13-8-2-4-14-10(7)8/h1-6, 14H/h5-1-, 13-3+                     |
|               | $C_{12}H_7N_3O$                                                                     |          |           |           |           |           |                                                                                                               |
| <b>G-58</b>   |  | 7, 7547  | 178, 3329 | -2, 0206  | 160, 4325 | 380, 378  | InChI=1S/C12H7N3O/c16-12-11-8-2-1-3-9(15(11)6-14-12)10-7(8)4-5-13-10/h1-6, 13H                                |
|               | $C_{12}H_7N_3O$                                                                     |          |           |           |           |           |                                                                                                               |
| <b>x4-18</b>  |  | 13, 8077 | 127, 1981 | -5, 3276  | 208, 9544 | 380, 4401 | InChI=1S/C12H7N3O/c16-12-10-8-6-14-15(12)9(8)3-1-2-7-4-5-13-11(7)10/h1-6, 13H/h2-1-, 3-1-, 7-2-, 9-3+, 11-10- |
|               | $C_{12}H_7N_3O$                                                                     |          |           |           |           |           |                                                                                                               |
| <b>q-11</b>   |  | 21, 8723 | 191, 5779 | -6, 127   | 140, 6933 | 380, 5765 | InChI=1S/C12H7N3O/c16-11-8-3-1-2-7-4-5-13-10(7)9(6-8)15-12(11)14-15/h1-6, 13H/h2-1-, 3-1-, 7-2-, 8-3+, 10-9-  |
|               | $C_{12}H_7N_3O$                                                                     |          |           |           |           |           |                                                                                                               |
| <b>B-146</b>  |  | 5, 8114  | 306, 8303 | -4, 1638  | 63, 8805  | 380, 6165 | InChI=1S/C12H7N3O/c16-12-11-14-10-6-9-8(3-4-13-9)7(10)2-1-5-15(11)12/h1-6, 13H/h5-1-, 7-2-, 14-11-            |
|               | $C_{12}H_7N_3O$                                                                     |          |           |           |           |           |                                                                                                               |
| <b>n-54</b>   |  | 41, 5804 | 302, 1261 | -18, 7673 | 37, 9675  | 380, 7042 | InChI=1S/C12H7N3O/c16-11-9-7(6-14-10(9)11)2-1-5-15-8-3-4-13-12(8)15/h1-6, 13H/h5-1-, 7-2-                     |
|               | $C_{12}H_7N_3O$                                                                     |          |           |           |           |           |                                                                                                               |
| <b>E-5</b>    |  | 17, 7844 | 190, 6341 | -2, 4951  | 138, 0758 | 380, 8977 | InChI=1S/C12H7N3O/c16-12-10-6-7-2-1-3-9(14-15(7)10)8-4-5-13-11(8)12/h1-6, 13H                                 |
|               | $C_{12}H_7N_3O$                                                                     |          |           |           |           |           |                                                                                                               |

|              |                                                                                     |         |          |          |          |          |                                                                                                                           |
|--------------|-------------------------------------------------------------------------------------|---------|----------|----------|----------|----------|---------------------------------------------------------------------------------------------------------------------------|
| <b>xS-45</b> |    | 19.1363 | 241.4263 | -8.2395  | 67.4453  | 380.9713 | InChI=1S/C12H7N3O/c16-12-10-9-6-8(15(9)10)3-1-2-7-4-5-13-11(7)14-12/h1-6H, (H, 13, 14, 16)                                |
| <b>B-134</b> |    | 8.7183  | 95.3234  | -3.4991  | 232.5639 | 381.0257 | InChI=1S/C12H7N3O/c16-12-10-6-9-7(3-4-13-9)8-2-1-5-15(10)14-11(8)12/h1-6, 13H                                             |
| <b>o-44</b>  |    | 3.8275  | 328.5753 | -1.7103  | 40.1384  | 381.0944 | InChI=1S/C12H7N3O/c16-12-7-6-8-9(3-4-13-8)15-5-1-2-10(15)14-11(7)12/h1-6, 13H/b7-6-, 14-11+                               |
| <b>o-14</b>  |    | 12.6666 | 148.1222 | -4.8182  | 184.2659 | 381.4021 | InChI=1S/C12H7N3O/c16-12-8-2-1-5-15-6-7(11(12)14-8)10-9(15)3-4-13-10/h1-6, 13H/b5-1-, 8-2-                                |
| <b>F-56</b>  |    | 6.8464  | 324.1257 | -4.3256  | 48.4684  | 381.404  | InChI=1S/C12H7N3O/c16-12-10-3-1-2-7-8-4-5-13-11(8)14-9(7)6-15(10)12/h1-6H, (H, 13, 14)/b2-1-, 9-6+, 10-3-                 |
| <b>G1-64</b> |    | 12.9837 | 280.9963 | -5.6158  | 44.8392  | 381.473  | InChI=1S/C12H7N3O/c16-10-3-1-2-8-7-4-5-12(7)15-9(6-14-8)11(10)15/h1-6, 13H/b3-1-, 8-2-                                    |
| <b>E-56</b>  |    | 5.746   | 109.6698 | -2.6643  | 231.0018 | 381.6102 | InChI=1S/C12H7N3O/c16-12-7-2-1-3-10-8-4-5-13-11(8)9(7)6-15(12)14-10/h1-6, 13H/b3-1-, 7-2+                                 |
| <b>A1-35</b> |    | 65.4155 | 299.7358 | -36.5455 | 36.1949  | 381.6798 | InChI=1S/C12H7N3O/c16-12-10-11(12)15(10)6-13-4-1-2-7-8-3-5-14-9(7)8/h1-6, 14H/b4-1-, 7-2-, 13-6+                          |
| <b>A2-55</b> |    | 12.6811 | 376.8157 | -2.9406  | -3.9061  | 381.7175 | InChI=1S/C12H7N3O/c16-10-6-8(10)12-13-4-1-2-9-7-3-5-14-11(7)15(9)12/h1-6, 14H                                             |
| <b>s12-7</b> |  | 33.5121 | 302.0714 | -11.4204 | 33.4162  | 381.8104 | InChI=1S/C12H7N3O/c16-12-8-6-10-7(4-5-13-10)2-1-3-9-11(8)15(12)14-9/h1-6, 13H/b3-1-, 7-2-, 10-6-                          |
| <b>n-38</b>  |  | 41.6362 | 299.5563 | -19.1408 | 40.9285  | 382.0145 | InChI=1S/C12H7N3O/c16-11-7-6-14-8(10(7)11)2-1-5-15-9-3-4-13-12(9)15/h1-6, 13H/b5-1-, 8-2-                                 |
| <b>n-27</b>  |  | 41.6417 | 299.5758 | -19.1411 | 40.9232  | 382.0531 | InChI=1S/C12H7N3O/c16-11-7-6-14-8(10(7)11)2-1-5-15-9-3-4-13-12(9)15/h1-6, 13H/b5-1-, 8-2+                                 |
| <b>o-122</b> |  | 18.906  | 149.5705 | -14.5719 | 186.3231 | 382.4127 | InChI=1S/C12H7N3O/c16-12-7-2-1-5-15(14-9-6-8(9)12)10-3-4-13-11(7)10/h1-6, 13H/b14-9-                                      |
| <b>B-67</b>  |  | 8.2463  | 154.0109 | -3.3952  | 183.2734 | 382.6586 | InChI=1S/C12H7N3O/c16-12-9-6-10-7(2-1-5-15(12)14-10)8-3-4-13-11(8)9/h1-6, 13H                                             |
| <b>G1-57</b> |  | 5.1452  | 378.8144 | -1.9874  | -4.31    | 382.6774 | InChI=1S/C12H7N3O/c16-10-3-1-2-9-7-4-5-13-12(7)15(9)11(10)8-6-14-8/h1-6, 13H/b11-8+                                       |
| <b>p11-8</b> |  | 24.0195 | 362.1523 | -14.0581 | 2.3418   | 382.7947 | InChI=1S/C12H7N3O/c16-12-11-10(15(11)12)8-3-1-2-7-4-5-13-9(7)6-14-8/h1-6, 13H/b2-1-, 3-1-, 7-27, 8-3-, 9-6+, 14-6+, 14-8- |
| <b>q-26</b>  |  | 19.1611 | 222.3701 | -5.7734  | 125.1465 | 383.0988 | InChI=1S/C12H7N3O/c16-12-11-14-8-3-1-2-7-4-5-13-10(7)9(6-8)15(11)12/h1-6, 13H/b2-1-, 3-1-, 7-2-, 8-3+, 10-9-              |
| <b>A-40</b>  |  | 28.9064 | 219.9518 | -12.6774 | 112.3738 | 383.1125 | InChI=1S/C12H7N3O/c16-11-8-6-14-9-2-1-5-15(10(8)11)12-7(9)3-4-13-12/h1-6, 13H/b14-6-                                      |
| <b>A-97</b>  |  | 28.9037 | 219.9567 | -12.6751 | 112.3776 | 383.1125 | InChI=1S/C12H7N3O/c16-12-9-6-14-15(11(9)12)5-1-2-7-8-3-4-13-10(7)8/h1-6, 13H/b5-1-, 7-2-                                  |

|                |                                                                                     |         |          |          |          |          |                                                                                                           |
|----------------|-------------------------------------------------------------------------------------|---------|----------|----------|----------|----------|-----------------------------------------------------------------------------------------------------------|
| <b>s11-22</b>  |    | 45.6984 | 221.2654 | -20.2391 | 109.0682 | 383.5982 | InChI=1S/C12H7N3O/c16-9-6-8(9)15-10-3-1-2-7-4-5-13-11(7)12(15)14-10/h1-6,13H/b2-1-,3-1-,7-2-,10-3+,12-11- |
| <b>H-7</b>     |    | 31.4162 | 237.5892 | -0.4189  | 91.6489  | 383.7032 | InChI=1S/C12H7N3O/c16-10-8-3-1-2-7(6-8)9-4-5-13-11(9)15-12(10)14-15/h1-6,13H                              |
| <b>F-45</b>    |    | 16.0704 | 208.1672 | -7.8066  | 142.9849 | 383.8432 | InChI=1S/C12H7N3O/c16-11-6-10-9-3-1-2-8(15(9)10)7-4-5-13-12(7)14-11/h1-6H, (H,13,14,16)                   |
| <b>H1-108</b>  |    | 22.9479 | 228.36   | -12.6454 | 106.985  | 383.9893 | InChI=1S/C12H7N3O/c16-10-3-1-2-7-6-9-12(15(9)10)14-11-8(7)4-5-13-11/h1-6,13H/b3-1-,7-2+                   |
| <b>r-47</b>    |    | 36.2934 | 122.4188 | -5.9502  | 154.0971 | 384.012  | InChI=1S/C12H7N3O/c16-12-10-8-6-15(12)9(10)3-1-2-7-4-5-13-11(7)14-8/h1-6H, (H,13,14)/b3-1-,7-2-           |
| <b>p1-8</b>    |    | 27.4471 | 251.7443 | 0.1078   | 91.3611  | 384.0151 | InChI=1S/C12H7N3O/c16-9-3-1-2-7-4-5-13-11(7)12-8(9)6-10-14-15(10)12/h1-6,13H/b3-1-,7-2-,12-11-            |
| <b>x9-27</b>   |    | 6.7249  | 331.3418 | -2.1824  | 27.9438  | 384.0773 | InChI=1S/C12H7N3O/c16-12-8-6-14-15-9(11(8)15)3-1-2-7-4-5-13-10(7)12/h1-6,13H/b2-1-,9-3+                   |
| <b>E-35</b>    |    | 17.1464 | 230.9232 | 0.4309   | 98.0555  | 384.2176 | InChI=1S/C12H7N3O/c16-11-6-10-12-7(4-5-13-12)8-2-1-3-9(11)15(10)14-8/h1-6,13H                             |
| <b>o-231</b>   |    | 5.2354  | 396.1676 | -4.3733  | -6.1106  | 384.4764 | InChI=1S/C12H7N3O/c16-12-11-9(3-4-13-11)15(12)5-1-2-7-6-8-10(7)14-8/h1-6,13H/b5-1-,7-2+                   |
| <b>H-139</b>   |  | 2.8751  | 321.2462 | -2.2854  | 54.0038  | 384.5051 | InChI=1S/C12H7N3O/c16-12-11(14-12)15-6-7-2-1-3-8(7)9-4-5-13-10(9)15/h1-6,13H                              |
| <b>p1-28</b>   |  | 21.5905 | 170.6936 | -3.6864  | 167.9083 | 384.519  | InChI=1S/C12H7N3O/c16-10-3-1-2-7-4-5-13-11(7)9-6-8(10)12-14-15(9)12/h1-6,13H/b3-1-,7-2-,11-9-             |
| <b>X-31</b>    |  | 24.0536 | 224.7255 | -6.7368  | 86.1720  | 384.5838 | InChI=1S/C12H7N3O/c16-9-6-7-2-1-4-13-12-10(9)15(12)11-8(7)3-5-14-11/h1-6,14H/b2-1-,13-4+                  |
| <b>x4-11</b>   |  | 22.193  | 267.0774 | -10.6831 | 77.1749  | 384.6324 | InChI=1S/C12H7N3O/c16-9-6-14-11-10-7(4-5-13-10)2-1-3-8-12(11)15(8)9/h1-6,13H/b2-1-,3-1-,7-2-,8-3+,11-10-  |
| <b>H11-116</b> |  | 6.9576  | 98.683   | -0.3222  | 235.294  | 384.8603 | InChI=1S/C12H7N3O/c16-11-9-6-15-12-8(4-5-13-12)7(9)2-1-3-10(11)14-15/h1-6,13H                             |
| <b>B-162</b>   |  | 12.1079 | 101.9582 | -3.6023  | 220.0471 | 385.0658 | InChI=1S/C12H7N3O/c16-10-9-6-14-12(10)15-5-1-2-7(9)8-3-4-13-11(8)15/h1-6,13H                              |
| <b>B-197</b>   |  | 12.1058 | 101.9626 | -3.6014  | 220.0521 | 385.0658 | InChI=1S/C12H7N3O/c16-11-8(7-3-4-13-10(7)11)2-1-5-15-9-6-14-12(9)15/h1-6,13H/b5-1-,8-2-                   |
| <b>F-22</b>    |  | 32.3923 | 90.7082  | -1.2189  | 175.0698 | 385.2188 | InChI=1S/C12H7N3O/c16-12-10-6-7-2-1-3-8(10)9-4-5-13-11(9)14-15(7)12/h1-6H, (H,13,14)                      |
| <b>G-39</b>    |  | 8.0588  | 180.4439 | -1.9583  | 163.7656 | 385.4359 | InChI=1S/C12H7N3O/c16-10-6-14-15-9-3-1-2-8(12(10)15)7-4-5-13-11(7)9/h1-6,13H                              |
| <b>H1-44</b>   |  | 34.7146 | 317.9273 | -0.913   | 24.4868  | 385.5878 | InChI=1S/C12H7N3O/c16-10-3-1-2-7-8-4-5-13-11(8)9(7)6-15-12(10)14-15/h1-6,13H/b3-1-,7-2-,9-6-              |

|                |                                                                                     |         |          |          |          |          |                                                                                                    |
|----------------|-------------------------------------------------------------------------------------|---------|----------|----------|----------|----------|----------------------------------------------------------------------------------------------------|
| <b>H11-151</b> |    | 10.3889 | 246.9327 | -5.0409  | 93.0635  | 385.6224 | InChI=1S/C12H7N3O/c16-11-7-2-1-3-10(15-6-9(11)15)14-12-8(7)4-5-13-12/h1-6H, (H, 13, 14)            |
| <b>r-24</b>    |    | 28.6283 | 260.1755 | -15.9036 | 60.9602  | 385.7178 | InChI=1S/C12H7N3O/c16-12-8-6-10-9(15(10)12)3-1-2-7-4-5-13-11(7)14-8/h1-6H, (H, 13, 14)             |
| <b>C-59</b>    |    | 22.0180 | 224.8696 | -8.4195  | 115.8410 | 385.7520 | InChI=1S/C12H7N3O/c16-12-11-8-2-1-4-14-10(15(11)12)6-9-7(8)3-5-13-9/h1-6, 13H/b2-1-, 14-4-         |
| <b>s11-50</b>  |    | 20.5703 | 231.4414 | -15.2791 | 110.2615 | 386.1579 | InChI=1S/C12H7N3O/c16-12-9-3-1-2-7-4-5-13-11(7)8-6-10(8)15(12)14-9/h1-6, 13H/b3-1-, 7-2-, 11-8+    |
| <b>X23-22</b>  |    | 20.1554 | 243.1066 | -12.0305 | 121.0635 | 386.1651 | InChI=1S/C12H7N3O/c16-12-11-8-6-7(15(11)12)2-1-4-13-9-3-5-14-10(8)9/h1-6, 14H/b2-1-, 13-4+         |
| <b>B-29</b>    |    | 21.3203 | 221.5702 | -13.4457 | 138.1159 | 386.1938 | InChI=1S/C12H7N3O/c16-10-6-9-12(10)14-15(9)5-1-2-7-8-3-4-13-11(7)8/h1-6, 13H/b5-1-, 7-2-           |
| <b>H1-100</b>  |    | 10.8615 | 316.3868 | -3.3016  | 44.764   | 386.4151 | InChI=1S/C12H7N3O/c16-11-3-1-2-7-8-4-5-13-10(8)6-9(7)12-14-15(11)12/h1-6, 13H/b3-1-, 7-2-          |
| <b>q-45</b>    |    | 29.8538 | 302.6913 | -1.3228  | 50.5487  | 386.4229 | InChI=1S/C12H7N3O/c16-10-6-9-11-7(4-5-13-11)2-1-3-8-12(14-8)15(9)10/h1-6, 13H/b2-1-, 8-3+          |
| <b>E-11</b>    |    | 16.3085 | 190.5955 | -5.7162  | 151.568  | 386.6361 | InChI=1S/C12H7N3O/c16-11-7-2-1-3-9-8-4-5-13-12(8)15(14-9)10(11)6-7/h1-6, 13H/b3-1-, 7-2-           |
| <b>n-201</b>   |   | 30.8459 | 249.3627 | -1.7002  | 106.769  | 386.8984 | InChI=1S/C12H7N3O/c16-12-7-2-1-5-15(12)9-3-4-13-11(9)10(7)8-6-14-8/h1-6, 13H/b10-8-                |
| <b>x6-33</b>   |  | 14.8256 | 210.6749 | -11.1197 | 152.5941 | 386.9951 | InChI=1S/C12H7N3O/c16-9-3-1-2-7-4-5-13-8(7)6-15-11-10(9)14-12(11)15/h1-6, 13H/b3-1-, 7-2-, 8-6+    |
| <b>s11-33</b>  |  | 2.2266  | 363.2665 | -2.1468  | 13.8607  | 387.0896 | InChI=1S/C12H7N3O/c16-12-11-10-7(4-5-13-10)2-1-3-8-9(6-14-8)15(11)12/h1-6, 13H/b3-1-, 7-2-, 11-10+ |
| <b>s11-66</b>  |  | 16.0458 | 204.1664 | -5.5498  | 147.7744 | 387.1428 | InChI=1S/C12H7N3O/c16-10-6-8-12-11-7(4-5-13-11)2-1-3-9(14-10)15(8)12/h1-6, 13H/b3-1-, 7-2-, 12-11+ |
| <b>B-26</b>    |  | 13.3250 | 239.7498 | -7.9708  | 108.4249 | 387.3239 | InChI=1S/C12H7N3O/c16-10-6-8-12(14-8)11-7(3-4-13-11)9-2-1-5-15(9)10/h1-6, 13H/b8-6+                |
| <b>l-70</b>    |  | 12.3622 | 374.8131 | -2.963   | -0.989   | 387.3557 | InChI=1S/C12H7N3O/c16-9-6-7(9)10-12-11-8(2-4-14-11)15(12)5-1-3-13-10/h1-6, 14H                     |
| <b>H1-133</b>  |  | 28.4088 | 323.5817 | -0.7958  | 25.3718  | 387.7236 | InChI=1S/C12H7N3O/c16-11-3-1-2-7-8-4-5-13-12(8)9(7)6-10-14-15(10)11/h1-6, 13H/b3-1-, 7-2-, 9-6+    |
| <b>n-152</b>   |  | 10.381  | 147.2249 | -2.8163  | 178.2509 | 387.7757 | InChI=1S/C12H7N3O/c16-12-7-2-1-5-15-9-3-4-13-11(9)10(12)8(7)6-14-15/h1-6, 13H/b5-1-, 7-2+          |
| <b>C-38</b>    |  | 13.6934 | 182.8836 | -7.9419  | 157.0088 | 388.0407 | InChI=1S/C12H7N3O/c16-10-6-9-12-8(2-1-4-14-15(9)12)7-3-5-13-11(7)10/h1-6, 13H                      |
| <b>q1-16</b>   |  | 50.3245 | 260.6623 | -31.441  | 85.7042  | 388.6626 | InChI=1S/C12H7N3O/c16-12-10-7(4-5-13-10)2-1-3-8-6-9(8)11-14-15(11)12/h1-6, 13H/b2-1-, 8-3-         |

|                |                                                                                     |         |          |          |          |          |                                                                                                               |
|----------------|-------------------------------------------------------------------------------------|---------|----------|----------|----------|----------|---------------------------------------------------------------------------------------------------------------|
| <b>q-33</b>    |    | 20.5913 | 171.5996 | -2.3227  | 170.0114 | 388.7535 | InChI=1S/C12H7N3O/c16-11-8-3-1-2-7-4-5-13-10(7)9(11)6-15-12(8)14-15/h1-6,13H/b2-1-,8-3+                       |
|                | $C_{12}H_7N_3O$                                                                     |         |          |          |          |          |                                                                                                               |
| <b>I-31</b>    |    | 30.0355 | 241.9833 | -11.511  | 104.7319 | 389.0207 | InChI=1S/C12H7N3O/c16-12-10-9-6-7-8(2-4-13-7)15(9)5-1-3-14-11(10)12/h1-6,13H/b5-1-,14-3-                      |
|                | $C_{12}H_7N_3O$                                                                     |         |          |          |          |          |                                                                                                               |
| <b>r-48</b>    |    | 16.6312 | 210.4221 | -7.3584  | 150.5829 | 389.0624 | InChI=1S/C12H7N3O/c16-12-10-8-3-1-2-7-4-5-13-11(7)14-9(6-8)15(10)12/h1-6H,(H,13,14)/b3-1-,7-2-                |
|                | $C_{12}H_7N_3O$                                                                     |         |          |          |          |          |                                                                                                               |
| <b>B-163</b>   |    | 9.4638  | 90.8963  | -2.6880  | 233.3984 | 389.4499 | InChI=1S/C12H7N3O/c16-12-9-6-14-11-10-8(3-4-13-10)7(9)2-1-5-15(11)12/h1-6,13H                                 |
|                | $C_{12}H_7N_3O$                                                                     |         |          |          |          |          |                                                                                                               |
| <b>o-45</b>    |    | 29.1464 | 189.7053 | -15.527  | 135.5273 | 389.4922 | InChI=1S/C12H7N3O/c16-12-8-6-7(8)2-1-5-15-9-3-4-13-10(9)11(12)14-15/h1-6,13H/b5-1-,7-2+                       |
|                | $C_{12}H_7N_3O$                                                                     |         |          |          |          |          |                                                                                                               |
| <b>x3-11</b>   |    | 29.5878 | 230.4044 | -10.2537 | 111.7192 | 389.6294 | InChI=1S/C12H7N3O/c16-12-9-7-6-15(5-1-3-13-7)8-2-4-14-11(8)10(9)12/h1-6,14H                                   |
|                | $C_{12}H_7N_3O$                                                                     |         |          |          |          |          |                                                                                                               |
| <b>X23-13</b>  |    | 26.8622 | 295.6441 | -17.6454 | 71.3918  | 389.7792 | InChI=1S/C12H7N3O/c16-12-11-10(15(11)12)7-2-1-4-13-8-3-5-14-9(8)6-7/h1-6,14H/b2-1-,4-1+,7-2+,9-6-,13-4+,13-8- |
|                | $C_{12}H_7N_3O$                                                                     |         |          |          |          |          |                                                                                                               |
| <b>H1-72</b>   |    | 9.1275  | 260.4201 | -3.8942  | 92.8823  | 389.9076 | InChI=1S/C12H7N3O/c16-10-3-1-2-7-8-4-5-13-11(8)12(14-10)15-6-9(7)15/h1-6,13H/b3-1-,7-2-,14-12-                |
|                | $C_{12}H_7N_3O$                                                                     |         |          |          |          |          |                                                                                                               |
| <b>B-220</b>   |    | 7.0604  | 49.9000  | -2.5844  | 293.1526 | 390.2323 | InChI=1S/C12H7N3O/c16-12-9-6-15-5-1-2-7(9)8-3-4-13-10(8)11(12)14-15/h1-6,13H                                  |
|                | $C_{12}H_7N_3O$                                                                     |         |          |          |          |          |                                                                                                               |
| <b>H11-70</b>  |   | 11.0727 | 195.7445 | -3.2136  | 163.4121 | 390.3056 | InChI=1S/C12H7N3O/c16-11-6-10-14-8-2-1-3-9(15(10)11)7-4-5-13-12(7)8/h1-6,13H                                  |
|                | $C_{12}H_7N_3O$                                                                     |         |          |          |          |          |                                                                                                               |
| <b>r-60</b>    |  | 26.9576 | 235.5927 | -15.6562 | 143.7479 | 390.4587 | InChI=1S/C12H7N3O/c16-12-14-11-7(4-5-13-11)2-1-3-8-6-9-10(8)15(9)12/h1-6H,(H,13,14,16)/b3-1-,7-2-             |
|                | $C_{12}H_7N_3O$                                                                     |         |          |          |          |          |                                                                                                               |
| <b>A2-88</b>   |  | 24.6288 | 199.683  | -8.8464  | 138.9161 | 390.4691 | InChI=1S/C12H7N3O/c16-10-6-9-12-13-4-1-2-7(10)8-3-5-14-11(8)15(9)12/h1-6,14H/b4-1-,7-2-,13-12+                |
|                | $C_{12}H_7N_3O$                                                                     |         |          |          |          |          |                                                                                                               |
| <b>o-190</b>   |  | 43.2162 | 212.8658 | -17.9671 | 122.5941 | 390.506  | InChI=1S/C12H7N3O/c16-10-6-8(10)7-2-1-5-15-9-3-4-13-12(9)11(7)14-15/h1-6,13H                                  |
|                | $C_{12}H_7N_3O$                                                                     |         |          |          |          |          |                                                                                                               |
| <b>B-155</b>   |  | 4.3637  | 333.3225 | -1.5723  | 33.7911  | 390.5621 | InChI=1S/C12H7N3O/c16-11-9-6-7(8-3-4-13-10(8)9)2-1-5-15-12(11)14-15/h1-6,13H/b5-1-,7-2+                       |
|                | $C_{12}H_7N_3O$                                                                     |         |          |          |          |          |                                                                                                               |
| <b>o-136</b>   |  | 8.9617  | 119.1315 | -1.7455  | 217.4528 | 390.6212 | InChI=1S/C12H7N3O/c16-12-7-2-1-5-15(9-6-14-10(7)9)8-3-4-13-11(8)12/h1-6,13H                                   |
|                | $C_{12}H_7N_3O$                                                                     |         |          |          |          |          |                                                                                                               |
| <b>A2-45</b>   |  | 9.761   | 90.2414  | -3.6611  | 249.2791 | 391.02   | InChI=1S/C12H7N3O/c16-10-9-6-15-11-8(3-5-14-11)7(9)2-1-4-13-12(10)15/h1-6,14H/b4-1-,7-2-,13-12-               |
|                | $C_{12}H_7N_3O$                                                                     |         |          |          |          |          |                                                                                                               |
| <b>q11-62</b>  |  | 2.3064  | 366.0954 | -2.0956  | 13.5149  | 391.058  | InChI=1S/C12H7N3O/c16-12-8-3-1-2-7-4-5-13-10(7)11-9(6-14-11)15(8)12/h1-6,13H/b2-1-,8-3-                       |
|                | $C_{12}H_7N_3O$                                                                     |         |          |          |          |          |                                                                                                               |
| <b>q1-50</b>   |  | 17.4953 | 178.1749 | -7.34    | 172.7485 | 391.3076 | InChI=1S/C12H7N3O/c16-11-8-6-15-9(12(15)14-8)3-1-2-7-4-5-13-10(7)11/h1-6,13H/b2-1-,9-3-                       |
|                | $C_{12}H_7N_3O$                                                                     |         |          |          |          |          |                                                                                                               |
| <b>H11-126</b> |  | 18.3915 | 182.4848 | -13.3984 | 151.815  | 391.8406 | InChI=1S/C12H7N3O/c16-12-8-2-1-3-9(15-6-10(15)14-8)7-4-5-13-11(7)12/h1-6,13H/b2-1-,9-3+,14-8-                 |
|                | $C_{12}H_7N_3O$                                                                     |         |          |          |          |          |                                                                                                               |

|               |                                                                                     |          |           |           |           |           |                                                                                                                    |
|---------------|-------------------------------------------------------------------------------------|----------|-----------|-----------|-----------|-----------|--------------------------------------------------------------------------------------------------------------------|
| <b>s12-40</b> |    | 32, 2411 | 306, 1649 | -11, 4919 | 32, 4026  | 392, 0367 | InChI=1S/C12H7N3O/c16-12-8-3-1-2-7-4-5-13-9(7)6-10-11(14-8)15(10)12/h1-6, 13H/t2-1-, 3-1-, 7-2-, 8-3-, 9-6-, 10-6- |
| <b>A-178</b>  |    | 16, 6905 | 221, 7856 | -6, 6724  | 134, 3578 | 392, 18   | InChI=1S/C12H7N3O/c16-12-11-10-9-8(3-4-13-9)7(6-14-10)2-1-5-15(11)12/h1-6, 13H/t5-1-, 7-2-, 11-10-                 |
| <b>A-75</b>   |    | 3, 8797  | 307, 3977 | -2, 9374  | 80, 4911  | 392, 3123 | InChI=1S/C12H7N3O/c16-12-10(9-6-14-9)7-2-1-5-15(12)11-8(7)3-4-13-11/h1-6, 13H/t10-9+                               |
| <b>A2-33</b>  |    | 16, 0641 | 201, 1743 | -8, 1536  | 158, 8676 | 392, 5144 | InChI=1S/C12H7N3O/c16-12-8-2-1-4-13-11(9-6-15(9)12)10-7(8)3-5-14-10/h1-6, 14H/t2-1-, 4-1-, 8-2-, 13-4-, 13-11-     |
| <b>o-201</b>  |    | 11, 0175 | 270, 0908 | -5, 4091  | 98, 6238  | 393, 2011 | InChI=1S/C12H7N3O/c16-12-7-6-9-10(3-4-13-9)15(12)5-1-2-8-11(7)14-8/h1-6, 13H/t5-1-, 8-2+                           |
| <b>G-60</b>   |    | 27, 0622 | 135, 2239 | -12, 9603 | 202, 5701 | 393, 3255 | InChI=1S/C12H7N3O/c16-10-6-14-15-9-3-1-2-8(12(9)15)7-4-5-13-11(7)10/h1-6, 13H/t14-6-                               |
| <b>E-64</b>   |    | 6, 1087  | 276, 6665 | -4, 7719  | 98, 5734  | 393, 3497 | InChI=1S/C12H7N3O/c16-12-10-3-1-2-8-7-4-5-13-9(7)6-11(14-8)15(10)12/h1-6, 13H/t2-1-, 10-3-                         |
| <b>B-70</b>   |    | 15, 9929 | 218, 6936 | -4, 0322  | 129, 8326 | 393, 4414 | InChI=1S/C12H7N3O/c16-12-9-6-10-14-15(10)5-1-2-7(9)8-3-4-13-11(8)12/h1-6, 13H/t5-1-, 7-2-, 9-6+                    |
| <b>o-206</b>  |   | 3, 9124  | 331, 1109 | -1, 4793  | 44, 3327  | 393, 5433 | InChI=1S/C12H7N3O/c16-12-7-6-9-8(14-9)2-1-5-15(12)10-3-4-13-11(7)10/h1-6, 13H/t5-1-, 7-6-, 8-2+                    |
| <b>o-134</b>  |  | 7, 2819  | 71, 3418  | -3, 2078  | 277, 0413 | 393, 6694 | InChI=1S/C12H7N3O/c16-12-7-2-1-5-15(10-6-8(12)14-10)9-3-4-13-11(7)9/h1-6, 13H                                      |
| <b>A2-54</b>  |  | 30, 4286 | 200, 372  | -16, 4849 | 142, 8395 | 393, 6884 | InChI=1S/C12H7N3O/c16-11-8-2-1-4-14-12(15-6-9(11)15)10-7(8)3-5-13-10/h1-6, 13H/t2-1-, 4-1-, 8-2-, 14-4-, 14-12+    |
| <b>A2-57</b>  |  | 9, 6726  | 200, 2529 | -2, 8935  | 153, 8267 | 394, 0419 | InChI=1S/C12H7N3O/c16-10-9-6-7-2-1-4-13-12(10)15(9)11-8(7)3-5-14-11/h1-6, 14H/t4-1-, 7-2-, 13-12+                  |
| <b>B-224</b>  |  | 11, 1261 | 117, 2096 | -4, 2309  | 220, 9679 | 394, 0717 | InChI=1S/C12H7N3O/c16-11-9-6-15-5-1-2-7(10(11)14-9)8-3-4-13-12(8)15/h1-6, 13H/t9-6+                                |
| <b>o-133</b>  |  | 4, 1566  | 321, 3279 | -2, 7564  | 59, 2623  | 394, 2847 | InChI=1S/C12H7N3O/c16-11-7-2-1-5-15-9-3-4-13-12(9)14-10(15)6-8(7)11/h1-6, 13H/t5-1-, 7-2-, 8-6+                    |
| <b>B-65</b>   |  | 2, 8312  | 316, 1776 | -1, 4743  | 61, 6931  | 394, 5034 | InChI=1S/C12H7N3O/c16-12-8-2-1-5-15-10(14-15)6-9(12)11-7(8)3-4-13-11/h1-6, 13H/t5-1-, 8-2-, 9-6-                   |
| <b>H11-66</b> |  | 12, 5431 | 113, 2213 | -5, 7391  | 227, 4253 | 394, 8312 | InChI=1S/C12H7N3O/c16-11-6-9-7-2-1-3-10(14-9)15(11)12-8(7)4-5-13-12/h1-6, 13H                                      |
| <b>q11-32</b> |  | 23, 6086 | 137, 2225 | -11, 0093 | 201, 3456 | 395, 061  | InChI=1S/C12H7N3O/c16-10-6-9-8-3-1-2-7-4-5-13-11(7)12(10)14-15(8)9/h1-6, 13H/t2-1-, 8-3-                           |
| <b>H1-73</b>  |  | 16, 7969 | 209, 8785 | -6, 013   | 136, 7235 | 395, 0625 | InChI=1S/C12H7N3O/c16-10-3-1-2-7-6-9(10)15-12(14-15)11-8(7)4-5-13-11/h1-6, 13H                                     |
| <b>B-147</b>  |  | 3, 1789  | 327, 7203 | -2, 1795  | 55, 2962  | 395, 1918 | InChI=1S/C12H7N3O/c16-12-11(14-12)15-5-1-2-8-7-3-4-13-9(7)6-10(8)15/h1-6, 13H                                      |

|                |                                                                                     |         |          |          |          |          |                                                                                                     |
|----------------|-------------------------------------------------------------------------------------|---------|----------|----------|----------|----------|-----------------------------------------------------------------------------------------------------|
| <b>B-200</b>   | 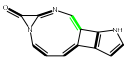   | 8.7272  | 338.1042 | -5.1547  | 45.1324  | 395.5303 | InChI=1S/C12H7N3O/c16-12-11-14-6-9-7(2-1-5-15(11)12)8-3-4-13-10(8)9/h1-6,13H/b5-1-,7-2-,9-6+,14-11- |
| <b>H11-91</b>  |    | 16.9959 | 254.9599 | -4.8991  | 101.1766 | 395.5609 | InChI=1S/C12H7N3O/c16-12-8-2-1-3-9(10-6-15(10)12)14-11-7(8)4-5-13-11/h1-6H, (H,13,14)               |
| <b>A-102</b>   |    | 5.6286  | 258.8255 | -2.9818  | 100.1163 | 395.5672 | InChI=1S/C12H7N3O/c16-12-10-7(3-4-13-10)8-2-1-5-15-9(6-14-8)11(12)15/h1-6,13H/b5-1-,8-2-,14-6-      |
| <b>B-252</b>   |    | 39.2827 | 231.5208 | -21.4907 | 110.9525 | 395.6011 | InChI=1S/C12H7N3O/c16-12-8-2-1-5-15-6-9(15)11(14-12)10-7(8)3-4-13-10/h1-6,13H/b5-1-,8-2-            |
| <b>A-199</b>   |    | 11.7548 | 156.7419 | -4.7505  | 191.6494 | 395.9290 | InChI=1S/C12H7N3O/c16-12-9-10-8(3-4-13-10)7-2-1-5-15(12)6-14-11(7)9/h1-6,13H/b5-1-,7-2-             |
| <b>I-77</b>    |    | 17.696  | 160.2131 | -4.4082  | 183.6305 | 396.0395 | InChI=1S/C12H7N3O/c16-9-6-7-10-11-8(2-4-14-11)15(12(9)10)5-1-3-13-7/h1-6,14H/b5-1-,13-3-            |
| <b>p11-17</b>  |    | 17.774  | 288.1218 | -10.1447 | 71.3682  | 396.4794 | InChI=1S/C12H7N3O/c16-12-11-10-9(15(11)12)3-1-2-7-4-5-13-8(7)6-14-10/h1-6,13H/b2-1-,9-3+,14-6-      |
| <b>q1-14</b>   |    | 22.5516 | 185.2736 | -7.6494  | 163.2958 | 396.6427 | InChI=1S/C12H7N3O/c16-12-10-7(4-5-13-10)2-1-3-8-6-9-11(12)14-15(8)9/h1-6,13H/b2-1-,8-3-             |
| <b>s11-58</b>  |   | 32.6573 | 296.473  | -0.7614  | 48.4964  | 396.6741 | InChI=1S/C12H7N3O/c16-9-6-8-11(9)12-7(4-5-13-12)2-1-3-10-14-15(8)10/h1-6,13H/b3-1-,7-2-,12-11-      |
| <b>s12-34</b>  |  | 26.1805 | 285.8108 | -17.4528 | 90.2972  | 396.7302 | InChI=1S/C12H7N3O/c16-12-10-11(15(10)12)14-8-3-1-2-7-4-5-13-9(7)6-8/h1-6,13H/b14-8+                 |
| <b>H1-15</b>   |  | 27.2143 | 146.5195 | -0.7758  | 155.923  | 396.9648 | InChI=1S/C12H7N3O/c16-11-3-1-2-7-8-4-5-13-12(8)10-6-9(7)14-15(10)11/h1-6,13H/b3-1-,7-2-             |
| <b>E-13</b>    |  | 5.5988  | 240.6331 | -3.0768  | 126.0427 | 396.9994 | InChI=1S/C12H7N3O/c16-12-8-2-1-3-9(14-15-6-10(12)15)7-4-5-13-11(7)8/h1-6,13H/b14-9+                 |
| <b>X-24</b>    |  | 35.1853 | 107.5470 | -4.9518  | 167.0259 | 397.3322 | InChI=1S/C12H7N3O/c16-12-10-11-9-8(3-5-14-9)7(6-15(11)12)2-1-4-13-10/h1-6,14H/b2-1-,13-4+           |
| <b>p1-22</b>   |  | 10.2506 | 223.494  | -3.7893  | 156.0392 | 397.3872 | InChI=1S/C12H7N3O/c16-9-3-1-2-7-4-5-13-10(7)12-11-8(14-11)6-15(9)12/h1-6,13H/b3-1-,7-2-,12-10+      |
| <b>H11-143</b> |  | 21.4571 | 280.5736 | -8.6731  | 62.0497  | 397.5504 | InChI=1S/C12H7N3O/c16-12-9-6-15(9)10-3-1-2-8(14-10)7-4-5-13-11(7)12/h1-6,13H                        |
| <b>o-175</b>   |  | 8.7028  | 91.2252  | -2.8035  | 251.6476 | 397.862  | InChI=1S/C12H7N3O/c16-12-7-2-1-5-15-9-3-4-13-11(9)8(7)6-10(15)14-12/h1-6,13H/b5-1-,7-2+             |
| <b>A-38</b>    |  | 43.1149 | 213.7075 | -19.9262 | 125.5195 | 398.287  | InChI=1S/C12H7N3O/c16-11-9-6-14-15-5-1-2-7(10(9)11)8-3-4-13-12(8)15/h1-6,13H/b14-6-                 |
| <b>A-140</b>   |  | 31.4001 | 247.7778 | -1.9229  | 117.2207 | 398.667  | InChI=1S/C12H7N3O/c16-12-10-7(3-4-13-10)8-2-1-5-15(12)11(8)9-6-14-9/h1-6,13H/b11-9-                 |
| <b>X-28</b>    |  | 16.8013 | 264.5596 | -6.1221  | 68.0765  | 398.7473 | InChI=1S/C12H7N3O/c16-12-10-8(3-5-13-10)7-2-1-4-14-15-9(6-7)11(12)15/h1-6,13H/b2-1-,14-4-           |



|               |                                                                                     |         |          |          |          |          |                                                                                                     |
|---------------|-------------------------------------------------------------------------------------|---------|----------|----------|----------|----------|-----------------------------------------------------------------------------------------------------|
| <b>o-226</b>  |    | 16.9773 | 255.9126 | -6.8639  | 103.0625 | 398.8468 | InChI=1S/C12H7N3O/c16-10-6-7-11(14-7)8-2-1-5-15(8)9-3-4-13-12(9)10/h1-6,13H/b7-6+                   |
| <b>o-55</b>   |    | 9.7556  | 94.0681  | -3.3881  | 248.7674 | 398.9458 | InChI=1S/C12H7N3O/c16-11-8-6-14-12(11)15-5-1-2-7(8)10-9(15)3-4-13-10/h1-6,13H                       |
| <b>A2-14</b>  |    | 6.362   | 316.5023 | -4.4833  | 69.0862  | 399.0445 | InChI=1S/C12H7N3O/c16-12-11-14-4-1-2-7-6-9(15(11)12)10-8(7)3-5-13-10/h1-6,13H/b4-1-,7-2-,14-11-     |
| <b>n-157</b>  |    | 10.4864 | 227.1501 | -4.5453  | 140.1875 | 399.4082 | InChI=1S/C12H7N3O/c16-11-7-2-1-5-15-8-3-4-13-12(8)14-6-9(15)10(7)11/h1-6,13H                        |
| <b>B-173</b>  |    | 10.6494 | 166.9557 | -3.2741  | 182.3572 | 399.6050 | InChI=1S/C12H7N3O/c16-12-11-10-8(3-4-13-10)7-2-1-5-15(12)9(6-7)14-11/h1-6,13H                       |
| <b>B-2</b>    |    | 40.7988 | 199.3532 | -18.4767 | 145.0187 | 399.6152 | InChI=1S/C12H7N3O/c16-10-6-9(10)11-7-2-1-5-15(14-11)12-8(7)3-4-13-12/h1-6,13H                       |
| <b>A2-1</b>   |    | 4.7056  | 375.359  | -1.2214  | 8.3403   | 399.7589 | InChI=1S/C12H7N3O/c16-12-11-14-4-1-2-7-8-3-5-13-10(8)9(7)6-15(11)12/h1-6,13H/b4-1-,7-2-,9-6-,14-11- |
| <b>x3-20</b>  |    | 22.6505 | 193.1365 | -10.1245 | 120.0192 | 400.0334 | InChI=1S/C12H7N3O/c16-12-10-7-6-15(5-1-3-14-12)8-2-4-13-11(8)9(7)10/h1-6,13H/b5-1-,14-3-            |
| <b>o-240</b>  |    | 13.869  | 213.3357 | -5.2186  | 155.2466 | 400.0802 | InChI=1S/C12H7N3O/c16-10-6-8-11(14-8)7-2-1-5-15(10)9-3-4-13-12(7)9/h1-6,13H/b8-6+                   |
| <b>A-90</b>   |   | 5.8297  | 259.6163 | -3.1021  | 101.7362 | 400.2021 | InChI=1S/C12H7N3O/c16-12-8-2-1-5-15-9(6-14-12)11(15)10-7(8)3-4-13-10/h1-6,13H/b5-1-,8-2-,14-6-      |
| <b>A-147</b>  |  | 5.8288  | 259.6198 | -3.1013  | 101.7392 | 400.2021 | InChI=1S/C12H7N3O/c16-12-8-2-1-5-15-9(6-14-12)11(15)10-7(8)3-4-13-10/h1-6,13H/b5-1-,8-2-,14-6-      |
| <b>q-37</b>   |  | 21.0764 | 264.5947 | -12.3504 | 104.5835 | 400.2749 | InChI=1S/C12H7N3O/c16-12-8-6-15(12)11-9(14-11)3-1-2-7-4-5-13-10(7)8/h1-6,13H/b2-1-,9-3+             |
| <b>B-214</b>  |  | 20.9788 | 223.1406 | -13.3699 | 150.8684 | 400.3782 | InChI=1S/C12H7N3O/c16-12-9-6-15(11(9)14-12)5-1-2-7-8-3-4-13-10(7)8/h1-6,13H/b5-1-,7-2-              |
| <b>B-73</b>   |  | 8.5003  | 110.7119 | -4.2030  | 240.9151 | 400.7151 | InChI=1S/C12H7N3O/c16-12-9-6-10-14-11-8(3-4-13-11)7(9)2-1-5-15(10)12/h1-6,13H                       |
| <b>o-143</b>  |  | 13.1384 | 78.941   | -4.0751  | 254.6704 | 401.012  | InChI=1S/C12H7N3O/c16-12-7-2-1-5-15(10-6-8(7)14-10)9-3-4-13-11(9)12/h1-6,13H/b5-1-,7-2-             |
| <b>q11-31</b> |  | 15.7286 | 222.1347 | -6.5177  | 146.3709 | 401.1255 | InChI=1S/C12H7N3O/c16-10-6-9-8-3-1-2-7-4-5-13-11(7)12(14-10)15(8)9/h1-6,13H/b2-1-,8-3-              |
| <b>p1-34</b>  |  | 14.7745 | 192.8863 | -9.7113  | 179.2925 | 401.141  | InChI=1S/C12H7N3O/c16-8-3-1-2-7-4-5-13-10(7)12-14-11-9(6-8)15(11)12/h1-6,13H/b3-1-,7-2-,9-6-,12-10+ |
| <b>q11-9</b>  |  | 10.6633 | 99.1836  | -6.2713  | 247.1434 | 401.2129 | InChI=1S/C12H7N3O/c16-12-8-6-15-9(8)3-1-2-7-4-5-13-10(7)11(12)14-15/h1-6,13H/b2-1-,9-3-             |
| <b>A-186</b>  |  | 32.7492 | 215.2297 | -12.1799 | 137.6089 | 401.7052 | InChI=1S/C12H7N3O/c16-11-9-7-2-1-5-15(6-14-10(9)11)12-8(7)3-4-13-12/h1-6,13H/b14-6-                 |

|                |                                                                                     |          |           |           |           |           |                                                                                                                           |
|----------------|-------------------------------------------------------------------------------------|----------|-----------|-----------|-----------|-----------|---------------------------------------------------------------------------------------------------------------------------|
| <b>q1-35</b>   |    | 17, 7246 | 182, 1614 | -8, 0541  | 186, 4422 | 401, 7966 | InChI=1S/C12H7N3O/c16-12-8-6-10-9(15(10)14-8)3-1-2-7-4-5-13-11(7)12/h1-6, 13H/b2-1-, 9-3-                                 |
| <b>X22-31</b>  |    | 15, 8218 | 187, 3031 | -9, 6674  | 181, 7438 | 401, 7984 | InChI=1S/C12H7N3O/c16-12-7-6-10-11-8(3-5-14-11)13-4-1-2-9(7)15(10)12/h1-6, 14H/b2-1-, 4-1-, 9-2-, 11-10+, 13-4-, 13-8-    |
| <b>s11-11</b>  |    | 30, 6095 | 88, 8487  | -2, 4147  | 212, 229  | 401, 9704 | InChI=1S/C12H7N3O/c16-12-8-6-10-11-7(4-5-13-11)2-1-3-9(8)14-15(10)12/h1-6, 13H/b3-1-, 7-2-, 11-10+                        |
| <b>H-69</b>    |    | 24, 304  | 236, 4696 | -8, 4314  | 122, 4646 | 402, 1769 | InChI=1S/C12H7N3O/c16-12-9-3-1-2-7(6-10-14-15(10)12)11-8(9)4-5-13-11/h1-6, 13H/b7-6+                                      |
| <b>H-14</b>    |    | 9, 689   | 163, 971  | -2, 3686  | 186, 9409 | 402, 3238 | InChI=1S/C12H7N3O/c16-10-7-2-1-3-9-8-4-5-13-11(8)15(6-7)12(10)14-9/h1-6, 13H/b2-1-, 7-3-                                  |
| <b>p1-38</b>   |    | 9, 0938  | 87, 4765  | -4, 5203  | 274, 5111 | 402, 3338 | InChI=1S/C12H7N3O/c16-9-3-1-2-7-4-5-13-10(7)12-14-11-8(9)6-15(11)12/h1-6, 13H/b3-1-, 7-2-, 12-10+                         |
| <b>j-11</b>    |    | 29, 1422 | 296, 5739 | -16, 9884 | 70, 4396  | 402, 6073 | InChI=1S/C12H7N3O/c16-12-11-10(15(11)12)7-2-1-4-13-8-3-5-14-9(8)6-7/h1-6, 14H/b2-1-, 4-1-, 7-2-, 7-6+, 9-6+, 13-4+, 13-8+ |
| <b>H-144</b>   |    | 4, 2011  | 335, 5062 | -3, 6905  | 56, 6177  | 402, 9528 | InChI=1S/C12H7N3O/c16-12-9(14-12)6-7-2-1-3-10-8-4-5-13-11(8)15(7)10/h1-6, 13H/b7-6+                                       |
| <b>B-72</b>    |    | 9, 5468  | 92, 1662  | -3, 2993  | 248, 6108 | 403, 0349 | InChI=1S/C12H7N3O/c16-12-9-6-10-11-8(3-4-13-11)7(9)2-1-5-15(12)14-10/h1-6, 13H                                            |
| <b>H11-146</b> |   | 26, 5225 | 181, 7576 | -2, 6243  | 175, 1671 | 403, 4782 | InChI=1S/C12H7N3O/c16-12-8-2-1-3-11-14-15(11)10(12)6-9-7(8)4-5-13-9/h1-6, 13H/b3-1-, 8-2-                                 |
| <b>n-180</b>   |  | 3, 943   | 308, 6081 | -3, 0076  | 90, 1258  | 404, 1097 | InChI=1S/C12H7N3O/c16-12-10(8-6-14-8)7-2-1-5-15(12)9-3-4-13-11(7)9/h1-6, 13H/b10-8+                                       |
| <b>H1-124</b>  |  | 14, 404  | 217, 317  | -4, 5402  | 157, 8046 | 404, 278  | InChI=1S/C12H7N3O/c16-7-2-1-3-9-8-4-5-13-11(8)15-10(6-7)12(15)14-9/h1-6, 13H/b2-1-, 9-3-, 10-6-                           |
| <b>r-30</b>    |  | 28, 0444 | 257, 366  | -16, 1202 | 103, 6407 | 404, 6738 | InChI=1S/C12H7N3O/c16-12-8-3-1-2-7-4-5-13-11(7)14-15(12)10-6-9(8)10/h1-6H, (H, 13, 14)/b3-1-, 7-2-                        |
| <b>X-47</b>    |  | 26, 8267 | 301, 7881 | -10, 1582 | 38, 2390  | 404, 7158 | InChI=1S/C12H7N3O/c16-12-10-8(3-5-13-10)7-2-1-4-14-11-9(6-7)15(11)12/h1-6, 13H/b2-1-, 4-1-, 7-2-, 14-4-, 14-11+           |
| <b>E-18</b>    |  | 17, 1108 | 188, 7346 | -11, 7536 | 171, 9912 | 405, 0279 | InChI=1S/C12H7N3O/c16-12-10-6-15(10)9-3-1-2-8(14-12)7-4-5-13-11(7)9/h1-6, 13H/b14-8+                                      |
| <b>r1-26</b>   |  | 14, 4322 | 206, 558  | -10, 0021 | 172, 1751 | 405, 0906 | InChI=1S/C12H7N3O/c16-10-3-1-2-7-4-5-13-12(7)14-15-9-6-8(10)11(9)15/h1-6H, (H, 13, 14)/b3-1-, 7-2-                        |
| <b>B-90</b>    |  | 8, 6524  | 383, 4929 | -1, 3744  | -1, 2400  | 405, 1161 | InChI=1S/C12H7N3O/c16-12-10-6-9-11-7(3-4-13-11)8(14-9)2-1-5-15(10)12/h1-6, 13H/b5-1-, 8-2-, 10-6-                         |
| <b>H1-62</b>   |  | 37, 4178 | 242, 0817 | -19, 5418 | 101, 3663 | 405, 1623 | InChI=1S/C12H7N3O/c16-10-3-1-2-8-7-4-5-13-11(7)12(14-10)9-6-15(8)9/h1-6, 13H/b3-1-, 8-2-, 14-12+                          |
| <b>s11-27</b>  |  | 13, 0446 | 125, 5835 | -4, 4157  | 209, 2359 | 405, 399  | InChI=1S/C12H7N3O/c16-12-8-6-15-11(8)10-7(4-5-13-10)2-1-3-9(12)14-15/h1-6, 13H/b3-1-, 7-2-, 11-10+                        |

|               |                                                                                     |         |          |          |          |          |                                                                                                           |
|---------------|-------------------------------------------------------------------------------------|---------|----------|----------|----------|----------|-----------------------------------------------------------------------------------------------------------|
| <b>p1-57</b>  | 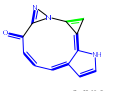   | 45.0512 | 265.1361 | -24.3066 | 74.1772  | 405.5603 | InChI=1S/C12H7N3O/c16-10-3-1-2-7-4-5-13-11(7)8-6-9(8)15-12(10)14-15/h1-6,13H/b3-1-,7-2-,11-8+             |
| <b>B-156</b>  |    | 11.1099 | 134.2884 | -4.3342  | 217.2857 | 405.5885 | InChI=1S/C12H7N3O/c16-10-9-6-7-2-1-5-15(12(10)14-9)11-8(7)3-4-13-11/h1-6,13H/b9-6-                        |
| <b>n-173</b>  |    | 10.528  | 233.6527 | -4.4348  | 142.5101 | 405.6015 | InChI=1S/C12H7N3O/c16-11-7-2-1-5-15-9-3-4-13-8(9)6-14-12(15)10(7)11/h1-6,13H                              |
| <b>p1-7</b>   |    | 18.6708 | 182.993  | -8.3884  | 187.611  | 406.065  | InChI=1S/C12H7N3O/c16-10-3-1-2-7-4-5-13-11(7)12-9-6-8(10)14-15(9)12/h1-6,13H/b3-1-,7-2-,12-11+            |
| <b>G1-93</b>  |    | 25.0414 | 260.1715 | -10.2187 | 86.8008  | 406.0666 | InChI=1S/C12H7N3O/c16-10-3-1-2-8-7-4-5-13-11(7)12-9(6-14-8)15(10)12/h1-6,13H/b3-1-,8-2-                   |
| <b>B-101</b>  |    | 14.5919 | 224.5256 | -10.4700 | 126.4957 | 406.2290 | InChI=1S/C12H7N3O/c16-12-8-2-1-5-15(10-6-9(10)14-12)11-7(8)3-4-13-11/h1-6,13H/b4-9-                       |
| <b>H11-72</b> |    | 19.1255 | 297.9108 | -7.2137  | 95.8822  | 406.347  | InChI=1S/C12H7N3O/c16-11-6-9-8(14-9)2-1-3-10-7-4-5-13-12(7)15(10)11/h1-6,13H/b2-1-,9-6-,10-3-             |
| <b>E-47</b>   |    | 17.9316 | 205.7924 | -11.9457 | 142.5112 | 406.6189 | InChI=1S/C12H7N3O/c16-12-9-3-1-2-8(14-10-6-15(9)10)7-4-5-13-11(7)12/h1-6,13H/b2-1-,9-3-,14-87             |
| <b>o-2</b>    |   | 3.91    | 332.5461 | -0.8276  | 40.7799  | 406.7397 | InChI=1S/C12H7N3O/c16-12-7-2-1-5-15-6-8(14-10(7)12)11-9(15)3-4-13-11/h1-6,13H/b5-1-,7-2-,14-10+           |
| <b>k-37</b>   |  | 75.7039 | 298.6089 | -44.7342 | 46.0788  | 406.7574 | InChI=1S/C12H7N3O/c16-12-9-8-6-15(8)5-1-3-13-7-2-4-14-11(7)10(9)12/h1-6,14H/b5-1-,13-3+                   |
| <b>F-40</b>   |  | 6.0562  | 422.5676 | -4.548   | -7.09    | 407.7498 | InChI=1S/C12H7N3O/c16-11-6-10-9(15(10)11)3-1-2-8-7-4-5-13-12(7)14-8/h1-6H, (H,13,14)/b2-1-,9-3-           |
| <b>o-24</b>   |  | 16.3298 | 189.4401 | -4.477   | 165.9804 | 407.9987 | InChI=1S/C12H7N3O/c16-12-7-2-1-5-15-9-3-4-13-11(9)10(15)6-8(12)14-7/h1-6,13H/b5-1-,7-2-,10-6-             |
| <b>X-36</b>   |  | 22.4627 | 218.3116 | -6.8948  | 154.3305 | 408.0401 | InChI=1S/C12H7N3O/c16-12-11-10-9-8(3-5-14-9)7(6-15(11)12)2-1-4-13-10/h1-6,14H/b2-1-,13-4+                 |
| <b>p1-61</b>  |  | 11.7442 | 205.621  | -5.6811  | 181.2857 | 408.2126 | InChI=1S/C12H7N3O/c16-9-3-1-2-7-4-5-13-10(7)11-8-6-14-12(9)15(8)11/h1-6,13H/b3-1-,7-2-,11-10+             |
| <b>A2-17</b>  |  | 28.1088 | 300.1096 | -18.1858 | 90.5473  | 408.3433 | InChI=1S/C12H7N3O/c16-10-6-9-12(15(9)10)14-4-1-2-7-8-3-5-13-11(7)8/h1-6,13H/b4-1-,7-2-,14-12+             |
| <b>A2-9</b>   |  | 38.5085 | 148.005  | -2.2015  | 132.8147 | 408.6141 | InChI=1S/C12H7N3O/c16-12-9-6-7-2-1-4-13-11(9)15(12)10-8(7)3-5-14-10/h1-6,14H/b2-1-,4-1-,7-2-,13-4-,13-11+ |
| <b>x4-23</b>  |  | 14.3688 | 131.3423 | -5.2323  | 235.0337 | 408.8757 | InChI=1S/C12H7N3O/c16-12-9-10-7(4-5-13-10)2-1-3-8-11(9)14-6-15(8)12/h1-6,13H/b2-1-,3-1-,7-2-,8-3+,10-9-   |
| <b>q11-58</b> |  | 10.8047 | 321.1137 | -8.1516  | 71.1154  | 409.0259 | InChI=1S/C12H7N3O/c16-12-9-3-1-2-7-4-5-13-11(7)8-6-10(14-8)15(9)12/h1-6,13H/b2-1-,9-3-                    |
| <b>C-29</b>   |  | 4.6772  | 409.1886 | -1.3878  | -6.9000  | 409.0847 | InChI=1S/C12H7N3O/c16-12-9-6-13-4-1-2-8-7-3-5-14-10(7)11(8)15(9)12/h1-6,14H/b2-1-,9-6-,13-4-              |

|               |                                                                                     |          |           |           |           |           |                                                                                                                      |
|---------------|-------------------------------------------------------------------------------------|----------|-----------|-----------|-----------|-----------|----------------------------------------------------------------------------------------------------------------------|
| <b>H11-29</b> |    | 15, 509  | 360, 778  | -6, 23    | 13, 3573  | 409, 2413 | InChI=1S/C12H7N3O/c16-12-11-6-10-8(4-5-13-10)7-2-1-3-9(7)14-15(11)12/h1-6, 13H/b1-6+, 14-9+                          |
| <b>H1-96</b>  |    | 35, 5576 | 285, 8959 | -18, 4848 | 107, 8659 | 409, 6079 | InChI=1S/C12H7N3O/c16-10(15-6-9-12(15)14-9)3-1-2-7-8-4-5-13-11(7)8/h1-6, 13H/b3-1-, 7-2-                             |
| <b>X22-10</b> |    | 14, 3582 | 268, 9758 | -6, 302   | 121, 8439 | 409, 9068 | InChI=1S/C12H7N3O/c16-12-9-6-7-2-1-4-13-8-3-5-14-10(8)11(7)15(9)12/h1-6, 14H/b2-1-, 4-1+, 7-2-, 11-10-, 13-4+, 13-8- |
| <b>B-168</b>  |    | 22, 2631 | 202, 4280 | -10, 5421 | 145, 2049 | 409, 9229 | InChI=1S/C12H7N3O/c16-12-10-8(3-4-13-10)7-2-1-5-15-9(6-7)11(15)14-12/h1-6, 13H/b1-6, 13H/b4-11+                      |
| <b>B-127</b>  |    | 18, 5362 | 245, 7404 | -0, 7296  | 120, 2535 | 409, 9749 | InChI=1S/C12H7N3O/c16-11-8-2-1-5-15-12(14-15)9(11)6-10-7(8)3-4-13-10/h1-6, 13H/b5-1-, 8-2-                           |
| <b>B-27</b>   |    | 10, 3319 | 290, 0698 | -3, 9610  | 102, 4724 | 410, 0598 | InChI=1S/C12H7N3O/c16-10-6-9-11(14-9)7-2-1-5-15(10)12-8(7)3-4-13-12/h1-6, 13H/b9-6+                                  |
| <b>n-47</b>   |    | 29, 9418 | 236, 7207 | -11, 1637 | 128, 1542 | 410, 266  | InChI=1S/C12H7N3O/c16-12-7-6-14-8-2-1-5-15(11(7)12)9-3-4-13-10(8)9/h1-6, 13H/b14-6-                                  |
| <b>X22-11</b> |    | 15, 0521 | 267, 8199 | -6, 6042  | 125, 823  | 410, 6209 | InChI=1S/C12H7N3O/c16-12-10-6-7-9(15(10)12)2-1-4-13-8-3-5-14-11(7)8/h1-6, 14H/b2-1-, 4-1+, 9-2+, 11-7+, 13-4+, 13-8- |
| <b>F-24</b>   |    | 14, 402  | 289, 6439 | -6, 0627  | 83, 2499  | 411, 245  | InChI=1S/C12H7N3O/c16-12-10-6-7-2-1-3-8(7)9-4-5-13-11(9)14-15(10)12/h1-6H, 6H, 13, 14)/b9-8-, 10-6-                  |
| <b>B-189</b>  |   | 9, 8923  | 343, 2398 | -5, 6494  | 54, 1731  | 411, 4031 | InChI=1S/C12H7N3O/c16-12-9-6-14-11-7(2-1-5-15(9)12)8-3-4-13-10(8)11/h1-6, 13H/b5-1-, 7-2-, 9-6-, 14-11+              |
| <b>q1-28</b>  |  | 25, 7905 | 237, 6206 | -13, 3513 | 142, 7206 | 411, 4976 | InChI=1S/C12H7N3O/c16-12-10-7(4-5-13-10)2-1-3-8-6-9-11(14-12)15(8)9/h1-6, 13H/b2-1-, 8-3-, 14-11-                    |
| <b>A1-46</b>  |  | 15, 0399 | 317, 2185 | -6, 9849  | 53, 8231  | 411, 5688 | InChI=1S/C12H7N3O/c16-9-6-13-4-1-2-8-7-3-5-14-10(7)12-11(9)15(8)12/h1-6, 14H/b4-1-, 8-2-, 13-6-                      |
| <b>H1-83</b>  |  | 5, 4295  | 378, 3863 | -1, 4205  | 15, 99    | 411, 7236 | InChI=1S/C12H7N3O/c16-11-3-1-2-10-7-4-5-13-12(7)15(10)14-9-6-8(9)11/h1-6, 13H/b3-1-, 10-2-, 14-9+                    |
| <b>A2-49</b>  |  | 34, 0664 | 259, 5813 | -18, 142  | 72, 4809  | 411, 9961 | InChI=1S/C12H7N3O/c16-11-10-8(3-5-13-10)7-2-1-4-14-12(11)15-6-9(7)15/h1-6, 13H/b4-1-, 7-2-, 14-12-                   |
| <b>s11-36</b> |  | 23, 1218 | 261, 8095 | -7, 5335  | 119, 7223 | 412, 2107 | InChI=1S/C12H7N3O/c16-12-11-10-7(4-5-13-10)2-1-3-8-6-9(14-8)15(11)12/h1-6, 13H/b3-1-, 7-2-, 11-10+                   |
| <b>G-26</b>   |  | 9, 0995  | 343, 0371 | -5, 665   | 55, 9812  | 412, 3139 | InChI=1S/C12H7N3O/c16-12-9-3-1-2-7-8-4-5-13-10(8)11(7)14-6-15(9)12/h1-6, 13H/b2-1-, 9-3-, 14-6-                      |
| <b>s11-65</b> |  | 21, 6676 | 206, 8672 | -8, 0977  | 161, 038  | 412, 5423 | InChI=1S/C12H7N3O/c16-10-6-9-12-11-7(4-5-13-11)2-1-3-8(10)14-15(9)12/h1-6, 13H/b3-1-, 7-2-, 12-11+                   |
| <b>q1-11</b>  |  | 56, 3338 | 297, 5131 | -35, 4473 | 66, 0221  | 412, 5729 | InChI=1S/C12H7N3O/c16-12-10-7(4-5-13-10)2-1-3-8-11(14-8)9-6-15(9)12/h1-6, 13H/b2-1-, 8-3+                            |
| <b>X23-48</b> |  | 21, 9523 | 201, 5274 | -11, 6095 | 152, 3051 | 412, 8202 | InChI=1S/C12H7N3O/c16-12-7-2-1-4-13-8-3-5-14-9(8)10-11(12)15(10)6-7/h1-6, 14H/b2-1-, 13-4-                           |

|                |  |         |          |          |          |          |                                                                                                           |
|----------------|--|---------|----------|----------|----------|----------|-----------------------------------------------------------------------------------------------------------|
| <b>o-38</b>    |  | 5.2712  | 339.6806 | -1.204   | 39.009   | 413.3015 | InChI=1S/C12H7N3O/c16-12-7-6-15(9-3-4-13-10(7)9)5-1-2-8-11(12)14-8/h1-6,13H/b5-1-,8-2+                    |
| <b>H11-103</b> |  | 11.6128 | 261.8223 | -6.5209  | 96.4561  | 413.3017 | InChI=1S/C12H7N3O/c16-12-10-6-15(10)9-3-1-2-8(14-12)11-7(9)4-5-13-11/h1-6,13H/b14-8+                      |
| <b>E-34</b>    |  | 9.7071  | 238.6297 | -3.8805  | 147.2322 | 415.108  | InChI=1S/C12H7N3O/c16-11-6-10-9-3-1-2-8(14-15(9)10)7-4-5-13-12(7)11/h1-6,13H/b10-6-                       |
| <b>o-132</b>   |  | 44.9042 | 274.6467 | -13.125  | 81.7624  | 415.1714 | InChI=1S/C12H7N3O/c16-11-7-2-1-5-15-9-3-4-13-10(9)12(15)14-8(11)6-7/h1-6,13H/b5-1-,7-2+,14-12+            |
| <b>G-56</b>    |  | 10.8898 | 265.8503 | -7.3089  | 122.2273 | 415.3505 | InChI=1S/C12H7N3O/c16-12-11-8-2-1-3-10(15(11)12)14-6-9-7(8)4-5-13-9/h1-6,13H/b14-6-                       |
| <b>q-2</b>     |  | 34.9799 | 161.3317 | -6.651   | 183.5588 | 415.8205 | InChI=1S/C12H7N3O/c16-11-9-6-8(15-12(11)14-15)3-1-2-7-4-5-13-10(7)9/h1-6,13H/b2-1-,3-1-,7-2-,8-3+,10-9-   |
| <b>I-26</b>    |  | 39.4171 | 282.4875 | -16.0584 | 77.2491  | 415.8239 | InChI=1S/C12H7N3O/c16-12-7-6-9-13-3-1-5-15(9)8-2-4-14-11(8)10(7)12/h1-6,14H                               |
| <b>A2-44</b>   |  | 26.6274 | 205.4175 | -12.4222 | 174.5697 | 416.1063 | InChI=1S/C12H7N3O/c16-12-10-6-8-11-7(3-5-14-11)9(15(10)12)2-1-4-13-8/h1-6,14H/b2-1-,4-1-,9-2+,13-4-,13-8- |
| <b>r-27</b>    |  | 47.3423 | 293.3871 | -28.3765 | 69.6384  | 416.2701 | InChI=1S/C12H7N3O/c16-11-8-3-1-2-7-4-5-13-12(7)14-15-6-9(15)10(8)11/h1-6H,14H/b2-1-,4-1-,9-2+,13-4-,13-8- |
| <b>H-107</b>   |  | 11.3733 | 351.1073 | -5.9723  | 40.0656  | 416.6119 | InChI=1S/C12H7N3O/c16-12-11-14-10-9(4-5-13-10)8-3-1-2-7(8)6-15(11)12/h1-6,13H/b7-6+,14-11+                |
| <b>B-41</b>    |  | 3.5876  | 367.6267 | -1.8386  | 37.5476  | 416.8128 | InChI=1S/C12H7N3O/c16-10-6-9-7(8-3-4-13-11(8)9)2-1-5-15-12(10)14-15/h1-6,13H/b5-1-,7-2+,9-6+              |
| <b>B-121</b>   |  | 10.1904 | 119.9854 | -3.9390  | 245.2591 | 416.8571 | InChI=1S/C12H7N3O/c16-11-7-2-1-5-15(10-6-9(11)14-10)12-8(7)3-4-13-12/h1-6,13H                             |
| <b>D-21</b>    |  | 37.6310 | 101.7245 | -0.8324  | 204.4411 | 417.4198 | InChI=1S/C12H7N3O/c16-12-10-8-6-15(12)9(2-1-4-13-8)7-3-5-14-11(7)10/h1-6,14H/b2-1-,13-4+                  |
| <b>q1-53</b>   |  | 43.142  | 272.9663 | -29.0933 | 95.8204  | 417.4465 | InChI=1S/C12H7N3O/c16-11-9-6-15(9)12-8(14-12)3-1-2-7-4-5-13-10(7)11/h1-6,13H/b2-1-,8-3+                   |
| <b>n-108</b>   |  | 13.797  | 225.0084 | -5.7352  | 143.9402 | 417.8372 | InChI=1S/C12H7N3O/c16-9-6-14-15-5-1-2-7-10(9)11(7)12-8(15)3-4-13-12/h1-6,13H/b5-1-,7-2-,14-6-             |
| <b>k-16</b>    |  | 14.2652 | 238.3662 | -10.899  | 163.0535 | 417.8653 | InChI=1S/C12H7N3O/c16-12-7-6-15-5-1-3-13-8-2-4-14-10(8)11(15)9(7)12/h1-6,14H/b5-1-,13-3+                  |
| <b>H-28</b>    |  | 10.6616 | 270.0842 | -2.5097  | 107.9448 | 418.0164 | InChI=1S/C12H7N3O/c16-12-7-2-1-3-9-8-4-5-13-11(8)15(9)10(6-7)14-12/h1-6,13H/b2-1-,9-3-                    |
| <b>H1-116</b>  |  | 6.8317  | 376.3778 | -1.6488  | 18.8174  | 418.2076 | InChI=1S/C12H7N3O/c16-7-2-1-3-10-8-4-5-13-11(8)15(10)12-9(6-7)14-12/h1-6,13H/b2-1-,9-6+,10-3-             |
| <b>p1-31</b>   |  | 13.186  | 256.0042 | -6.3984  | 135.211  | 418.2742 | InChI=1S/C12H7N3O/c16-10-3-1-2-7-4-5-13-11(7)8-6-9-12(14-8)15(9)10/h1-6,13H/b3-1-,7-2-,11-8+              |

|                                                                                     |         |          |          |          |          |                                                                                                                     |
|-------------------------------------------------------------------------------------|---------|----------|----------|----------|----------|---------------------------------------------------------------------------------------------------------------------|
| 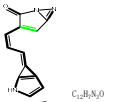   | 33.1114 | 329.6061 | -12.0708 | 62.797   | 418.4548 | InChI=1S/C12H7N3O/c16-12-7(6-10-14-15(10)12)2-1-3-8-9-4-5-13-11(8)9/h1-6,13H/b2-1-,8-3-                             |
|    | 8.1998  | 274.4753 | -3.9283  | 118.0544 | 418.8747 | InChI=1S/C12H7N3O/c16-10-6-9-11-8(10)3-1-2-7-4-5-13-12(7)14-15(9)11/h1-6H,(H,13,14)/b3-1-,7-2-                      |
|    | 13.707  | 256.0018 | -4.1224  | 114.2555 | 419.1308 | InChI=1S/C12H7N3O/c16-10-3-1-2-7-6-9-12(14-10)15(9)11-8(7)4-5-13-11/h1-6,13H/b3-1-,7-2-,14-12+                      |
|    | 12.9063 | 253.3421 | -5.2919  | 139.6867 | 419.1834 | InChI=1S/C12H7N3O/c16-12-11-7(4-5-13-11)8-2-1-3-9-10(6-14-8)15(9)12/h1-6,13H/b2-1-,3-1-,8-2-,9-3-,10-6-,14-6-,14-8- |
|    | 46.4349 | 346.2874 | -19.6216 | 38.4811  | 419.4754 | InChI=1S/C12H7N3O/c16-12-10-11(12)15(6-14-10)5-1-2-7-8-3-4-13-9(7)8/h1-6,13H/b5-1-,7-2-                             |
|    | 39.6345 | 299.5055 | -22.6694 | 69.1183  | 419.5641 | InChI=1S/C12H7N3O/c16-11-8-3-1-2-7-4-5-13-12(7)14-9-6-15(9)10(8)11/h1-6H,(H,13,14)/b3-1-,7-2-                       |
|    | 12.8826 | 287.9336 | -4.6364  | 71.4206  | 419.8102 | InChI=1S/C12H7N3O/c16-11-7-2-1-4-13-10(11)9-6-15(9)12-8(7)3-5-14-12/h1-6,14H                                        |
|    | 9.4541  | 288.9039 | -4.9602  | 106.8930 | 420.6262 | InChI=1S/C12H7N3O/c16-11-9-6-10-8(3-4-13-10)7(9)2-1-5-15-12(11)14-15/h1-6,13H/b5-1-,7-2-                            |
|    | 10.9704 | 113.7608 | -3.1505  | 247.3011 | 421.4933 | InChI=1S/C12H7N3O/c16-9-6-10-14-12(9)7-2-1-5-15(10)8-3-4-13-11(7)8/h1-6,13H                                         |
|    | 14.6902 | 191.0045 | -9.9452  | 210.7976 | 421.4943 | InChI=1S/C12H7N3O/c16-8-3-1-2-7-4-5-13-10(7)11-12-14-9(6-8)15(11)12/h1-6,13H/b3-1-,7-2-,9-6-,11-10+                 |
|   | 42.5105 | 330.1977 | -19.7335 | 38.7267  | 421.7303 | InChI=1S/C12H7N3O/c16-11-9-10(11)15-6-8(15)3-1-2-7-4-5-13-12(7)14-9/h1-6H,(H,13,14)/b3-1-,7-2-                      |
|  | 28.5182 | 244.978  | -10.9357 | 138.0366 | 421.8263 | InChI=1S/C12H7N3O/c16-12-7-6-8-10-9(2-4-14-10)15(11(7)12)5-1-3-13-8/h1-6,14H/b5-1-,13-3-                            |
|  | 28.2133 | 156.5812 | -6.5905  | 207.4458 | 422.0654 | InChI=1S/C12H7N3O/c16-11-9-3-1-2-7(6-15-12(11)14-15)10-8(9)4-5-13-10/h1-6,13H/b7-6+                                 |
|  | 9.8748  | 334.6597 | -4.9325  | 65.7759  | 422.1236 | InChI=1S/C12H7N3O/c16-12-11-14-9-6-8(15(11)12)3-1-2-7-4-5-13-10(7)9/h1-6,13H/b2-1-,3-1-,7-2-,8-3-,10-9-             |
|  | 14.8398 | 208.2431 | -6.2049  | 159.3172 | 422.4126 | InChI=1S/C12H7N3O/c16-12-10-7-2-1-5-15(14-6-8(7)10)9-3-4-13-11(9)12/h1-6,13H/b5-1-,7-2-,14-6-                       |
|  | 7.0239  | 368.7743 | -1.7311  | 34.8647  | 422.4965 | InChI=1S/C12H7N3O/c16-12-11-14-9-6-7(2-1-5-15(11)12)8-3-4-13-10(8)9/h1-6,13H/b5-1-,7-2-,14-11-                      |
|  | 47.4611 | 272.479  | -23.0086 | 95.8691  | 422.608  | InChI=1S/C12H7N3O/c16-10-3-1-2-7-4-5-13-11(7)8-6-9(8)12-14-15(10)12/h1-6,13H/b3-1-,7-2-,11-8+                       |
|  | 11.1202 | 113.3175 | -3.2751  | 245.6974 | 422.8723 | InChI=1S/C12H7N3O/c16-12-10-6-8(14-12)7-2-1-5-15(10)9-3-4-13-11(7)9/h1-6,13H                                        |
|  | 6.2419  | 364.8261 | -0.7995  | 27.2967  | 422.9695 | InChI=1S/C12H7N3O/c16-10-3-1-2-7-6-9(15-12(10)14-15)11-8(7)4-5-13-11/h1-6,13H/b3-1-,7-2+                            |

|                |                                                                                     |         |          |          |          |          |                                                                                                                    |
|----------------|-------------------------------------------------------------------------------------|---------|----------|----------|----------|----------|--------------------------------------------------------------------------------------------------------------------|
| <b>B-126</b>   | 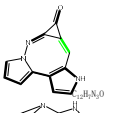   | 17.1357 | 353.5146 | -5.4672  | 24.8415  | 423.0857 | InChI=1S/C12H7N3O/c16-12-8-6-9-7(3-4-13-9)10-2-1-5-15(10)14-11(8)12/h1-6,13H/b8-6+,14-11+                          |
| <b>A1-26</b>   |    | 14.2232 | 227.3943 | -5.835   | 147.4151 | 423.1151 | InChI=1S/C12H7N3O/c16-12-10-7-2-1-4-13-6-9(10)15(12)11-8(7)3-5-14-11/h1-6,14H/b2-1-,4-1-,7-2-,9-6+,13-4-,13-6-     |
| <b>I-72</b>    |    | 41.0449 | 200.2737 | -18.5419 | 173.8625 | 423.2859 | InChI=1S/C12H7N3O/c16-9-6-7(9)12-11-10-8(2-4-14-10)15(12)5-1-3-13-11/h1-6,14H                                      |
| <b>H11-17</b>  |    | 20.0378 | 223.1456 | -12.7431 | 145.1855 | 423.4554 | InChI=1S/C12H7N3O/c16-12-9-3-1-2-7(10-6-15(10)12)8-4-5-13-11(8)14-9/h1-6H,11(13,14)                                |
| <b>xS-12</b>   |    | 41.6476 | 327.6544 | -19.36   | 43.1568  | 423.6578 | InChI=1S/C12H7N3O/c16-11-9-10(11)15-6-8(15)3-1-2-7-4-5-13-12(7)14-9/h1-6H,11(13,14)/b3-1-,7-2-                     |
| <b>H-59</b>    |    | 17.6614 | 301.1117 | -10.083  | 107.3286 | 423.7168 | InChI=1S/C12H7N3O/c16-11-9(8-4-5-13-10(8)11)3-1-2-7-6-15-12(7)14-15/h1-6,13H/b2-1-,9-3-                            |
| <b>H1-121</b>  |    | 24.7106 | 186.2007 | -15.7712 | 189.3037 | 423.8207 | InChI=1S/C12H7N3O/c16-11-3-1-2-9-7-4-5-13-8(7)6-10-12(14-11)15(9)10/h1-6,13H/b3-1-,9-2-,14-12-                     |
| <b>H11-100</b> |   | 11.3107 | 89.7304  | -3.9303  | 268.9902 | 424.0463 | InChI=1S/C12H7N3O/c16-12-9-6-15-10(14-12)3-1-2-7(9)8-4-5-13-11(8)15/h1-6,13H/b3-1-,7-2-                            |
| <b>p1-52</b>   |  | 46.3614 | 261.1107 | -26.5075 | 112.242  | 424.0732 | InChI=1S/C12H7N3O/c16-9-3-1-2-7-4-5-13-10(7)11-12(14-11)15-6-8(9)15/h1-6,13H/b3-1-,7-2-,11-10-                     |
| <b>H-33</b>    |  | 42.4539 | 167.6417 | -5.5452  | 179.3323 | 424.5622 | InChI=1S/C12H7N3O/c16-10-6-7-2-1-3-9(15-12(7)14-15)8-4-5-13-11(8)10/h1-6,13H/b7-6+                                 |
| <b>H-70</b>    |  | 24.6988 | 242.0923 | -8.7705  | 140.7063 | 425.0937 | InChI=1S/C12H7N3O/c16-12-9-3-1-2-7(11-14-15(11)12)6-10-8(9)4-5-13-10/h1-6,13H/b2-1-,3-1-,7-2-,7-6-,9-3+,9-8+,10-6- |
| <b>o-181</b>   |  | 17.895  | 296.2275 | -0.7618  | 95.5488  | 425.3649 | InChI=1S/C12H7N3O/c16-12-10-6-8-7(14-8)2-1-5-15(10)9-3-4-13-11(9)12/h1-6,13H/b5-1-,7-2-,10-6-                      |
| <b>H1-136</b>  |  | 13.386  | 237.6454 | -3.4279  | 130.4353 | 425.7003 | InChI=1S/C12H7N3O/c16-11-3-1-2-7-8-4-5-13-12(8)15-9(7)6-10(15)14-11/h1-6,13H/b3-1-,7-2-,14-10-                     |
| <b>H-62</b>    |  | 18.7494 | 113.1154 | 0.4264   | 223.0127 | 425.7237 | InChI=1S/C12H7N3O/c16-11-8-3-1-2-7-6-15(14-10(7)11)12-9(8)4-5-13-12/h1-6,13H                                       |
| <b>n-138</b>   |  | 11.3296 | 154.2074 | -3.516   | 211.4942 | 425.7329 | InChI=1S/C12H7N3O/c16-11-9-7-2-1-5-15(12(9)14-6-7)8-3-4-13-10(8)11/h1-6,13H                                        |
| <b>H-45</b>    |  | 24.7334 | 210.4218 | -5.4986  | 175.0062 | 425.7541 | InChI=1S/C12H7N3O/c16-10-6-7-2-1-3-9(12-14-15(10)12)8-4-5-13-11(7)8/h1-6,13H/b7-6+                                 |
| <b>E-59</b>    |  | 6.048   | 288.3555 | -4.033   | 117.2931 | 426.4338 | InChI=1S/C12H7N3O/c16-12-9-3-1-2-8-7-4-5-13-11(7)10(6-14-8)15(9)12/h1-6,13H/b2-1-,9-3-                             |
| <b>q-39</b>    |  | 9.7493  | 157.7733 | -4.9035  | 220.9339 | 426.5751 | InChI=1S/C12H7N3O/c16-12-8-6-15-9(11(15)14-12)3-1-2-7-4-5-13-10(7)8/h1-6,13H/b2-1-,9-3-                            |
| <b>s12-37</b>  |  | 19.6614 | 261.1851 | -7.5654  | 122.4141 | 426.9298 | InChI=1S/C12H7N3O/c16-12-11-9-6-8-7(4-5-13-8)2-1-3-10(14-9)15(11)12/h1-6,13H/b3-1-,7-2-,8-6-                       |

|               |                                                                                     |         |          |          |          |          |                                                                                                              |
|---------------|-------------------------------------------------------------------------------------|---------|----------|----------|----------|----------|--------------------------------------------------------------------------------------------------------------|
| <b>x5-11</b>  |    | 58,9177 | 267,1308 | -33,5843 | 88,5578  | 427,1074 | InChI=1S/C12H7N3O/c16-11-9-10(11)15(9)8-3-1-2-7-4-5-13-12(7)14-6-8/h1-6H, (H, 13, 14)                        |
| <b>n-37</b>   |    | 43,1635 | 216,9249 | -19,7439 | 148,2142 | 427,1236 | InChI=1S/C12H7N3O/c16-12-8-6-14-15-5-1-2-7(10(8)12)11-9(15)3-4-13-11/h1-6, 13H/b14-6-                        |
| <b>o-93</b>   |    | 8,655   | 171,2507 | -2,4238  | 200,6392 | 427,4907 | InChI=1S/C12H7N3O/c16-12-11-8-6-7(14-11)2-1-5-15(12)9-3-4-13-10(8)9/h1-6, 13H/b5-1-, 7-2-                    |
| <b>o-39</b>   |    | 16,8175 | 284,8075 | -1,4015  | 107,8789 | 427,9361 | InChI=1S/C12H7N3O/c16-12-10-6-8-9(3-4-13-8)15(10)5-1-2-7-11(12)14-7/h1-6, 13H/b5-1-, 7-2+                    |
| <b>H1-115</b> |    | 23,7915 | 208,9441 | -8,9835  | 169,2083 | 428,5144 | InChI=1S/C12H7N3O/c16-7-2-1-3-10-8-4-5-13-11(8)9(6-7)12-14-15(10)12/h1-6, 13H/b2-1-, 9-6+, 10-3-             |
| <b>n-55</b>   |    | 35,6201 | 233,9994 | -15,4841 | 139,215  | 428,8988 | InChI=1S/C12H7N3O/c16-12-9-7-2-1-5-15(6-14-11(9)12)8-3-4-13-10(7)8/h1-6, 13H/b14-6-                          |
| <b>E-39</b>   |    | 18,7952 | 181,6983 | -4,7446  | 176,4615 | 429,4183 | InChI=1S/C12H7N3O/c16-11-6-8-10-3-1-2-9(14-15(10)11)7-4-5-13-12(7)8/h1-6, 13H                                |
| <b>B-144</b>  |    | 17,5118 | 239,9575 | -6,1261  | 139,6164 | 429,5412 | InChI=1S/C12H7N3O/c16-12-8-2-1-5-15-10(11(15)14-12)6-9-7(8)3-4-13-9/h1-6, 13H/b5-1-, 8-2-, 10-6+, 14-11+     |
| <b>o-244</b>  |   | 24,0463 | 285,6107 | -13,8808 | 109,8294 | 429,6235 | InChI=1S/C12H7N3O/c16-10-6-8-7(11(8)14-10)2-1-5-15-9-3-4-13-12(9)15/h1-6, 13H/b1-7-, 7-2+                    |
| <b>q-41</b>   |  | 28,2041 | 170,6939 | -5,7242  | 204,1974 | 430,1464 | InChI=1S/C12H7N3O/c16-10-6-9-11-7(4-5-13-11)2-1-3-8(10)12-14-15(9)12/h1-6, 13H/b2-1-, 8-3+                   |
| <b>B-14</b>   |  | 26,2597 | 177,0629 | -3,7344  | 202,3775 | 430,1767 | InChI=1S/C12H7N3O/c16-10-6-9-11-8(3-4-13-11)7(10)2-1-5-15-12(9)14-15/h1-6, 13H/b5-1-, 7-2-                   |
| <b>x4-24</b>  |  | 10,8816 | 276,6831 | -7,1206  | 119,1811 | 430,4757 | InChI=1S/C12H7N3O/c16-12-9-10-7(4-5-13-10)2-1-3-8-11(9)15(8)6-14-12/h1-6, 13H/b2-1-, 3-1-, 7-2-, 8-3+, 10-9- |
| <b>H-34</b>   |  | 41,4222 | 173,5108 | -4,9031  | 182,7742 | 430,4758 | InChI=1S/C12H7N3O/c16-10-6-7-2-1-3-9(12-14-15(7)12)8-4-5-13-11(8)10/h1-6, 13H/b7-6-                          |
| <b>X-40</b>   |  | 28,7128 | 271,8828 | -9,1544  | 107,7547 | 430,5360 | InChI=1S/C12H7N3O/c16-12-10-9-6-7(2-1-4-13-9)8-3-5-14-11(8)15(10)12/h1-6, 14H                                |
| <b>x7-36</b>  |  | 28,041  | 266,7163 | -22,1944 | 118,642  | 430,5736 | InChI=1S/C12H7N3O/c16-8-3-1-2-7-4-5-13-11(7)10-9(8)12(10)15-6-14-15/h1-6, 13H/b3-1-, 7-2-, 11-10-            |
| <b>o-147</b>  |  | 6,3847  | 94,4552  | -2,0196  | 287,7538 | 430,7088 | InChI=1S/C12H7N3O/c16-9-6-10-14-11-7(9)2-1-5-15(10)8-3-4-13-12(8)11/h1-6, 13H/b5-1-, 7-2-                    |
| <b>n-194</b>  |  | 13,6155 | 225,8832 | -5,8859  | 157,0082 | 430,9128 | InChI=1S/C12H7N3O/c16-12-10-7-2-1-5-15(6-14-12)8-3-4-13-11(8)9(7)10/h1-6, 13H/b5-1-, 7-2-, 14-6-             |
| <b>C-1</b>    |  | 12,3328 | 307,7674 | -3,9600  | 103,8312 | 431,3015 | InChI=1S/C12H7N3O/c16-10-6-9(10)11-7-2-1-4-14-15(11)12-8(7)3-5-13-12/h1-6, 13H                               |
| <b>A2-66</b>  |  | 5,7022  | 385,9717 | -1,1302  | 20,7343  | 431,3694 | InChI=1S/C12H7N3O/c16-11-8-6-15-9(2-1-4-13-10(8)11)7-3-5-14-12(7)15/h1-6, 14H/b4-1-, 8-6+, 9-2-, 13-10+      |



|               |                                                                                     |         |          |          |          |          |                                                                                                                    |
|---------------|-------------------------------------------------------------------------------------|---------|----------|----------|----------|----------|--------------------------------------------------------------------------------------------------------------------|
| <b>B-151</b>  |    | 20.3961 | 196.5206 | -1.6404  | 184.1428 | 432.0725 | InChI=1S/C12H7N3O/c16-11-9-6-7(8-3-4-13-10(8)11)2-1-5-15-12(9)14-15/h1-6,13H/b5-1-,7-2+                            |
|               | <chem>C12H7N3O</chem>                                                               |         |          |          |          |          |                                                                                                                    |
| <b>s11-3</b>  |    | 11.3015 | 329.8128 | -6.2257  | 79.8201  | 432.211  | InChI=1S/C12H7N3O/c16-12-9-6-8-11-7(4-5-13-11)2-1-3-10(14-8)15(9)12/h1-6,13H/b2-1-,3-1-,7-2-,10-3+,11-8+           |
|               | <chem>C12H7N3O</chem>                                                               |         |          |          |          |          |                                                                                                                    |
| <b>q-1</b>    |    | 14.1359 | 128.427  | -4.5503  | 239.5969 | 432.8718 | InChI=1S/C12H7N3O/c16-12-8-6-15-9(11)(12)14-15(3-1-2-7-4-5-13-10(7)8)/h1-6,13H/b2-1-,9-3-                          |
|               | <chem>C12H7N3O</chem>                                                               |         |          |          |          |          |                                                                                                                    |
| <b>H1-97</b>  |    | 35.261  | 367.5303 | -24.3244 | 39.895   | 433.0871 | InChI=1S/C12H7N3O/c16-10(14-12-9-6-15(9)12)3-1-2-7-8-4-5-13-11(7)8/h1-6,13H/b3-1-,7-2-,14-12-                      |
|               | <chem>C12H7N3O</chem>                                                               |         |          |          |          |          |                                                                                                                    |
| <b>A-180</b>  |    | 13.396  | 259.5742 | -7.0592  | 124.9311 | 433.4148 | InChI=1S/C12H7N3O/c16-12-11-10-9-8(3-4-13-9)7(6-14-12)2-1-5-15(10)11/h1-6,13H/b5-1-,7-2+,14-6-                     |
|               | <chem>C12H7N3O</chem>                                                               |         |          |          |          |          |                                                                                                                    |
| <b>o-112</b>  |    | 10.6532 | 89.2497  | -3.7913  | 276.59   | 433.4179 | InChI=1S/C12H7N3O/c16-12-7-2-1-5-15-8-3-4-13-11(8)10(7)14-6-9(12)15/h1-6,13H                                       |
|               | <chem>C12H7N3O</chem>                                                               |         |          |          |          |          |                                                                                                                    |
| <b>o-225</b>  |    | 10.5882 | 106.1123 | -4.3093  | 268.2282 | 433.5861 | InChI=1S/C12H7N3O/c16-10-6-8-7-2-1-5-15(14-11(7)8)9-3-4-13-12(9)10/h1-6,13H/b8-6-                                  |
|               | <chem>C12H7N3O</chem>                                                               |         |          |          |          |          |                                                                                                                    |
| <b>o-224</b>  |    | 10.5873 | 106.1127 | -4.3087  | 268.2355 | 433.5862 | InChI=1S/C12H7N3O/c16-12-8-6-10(14-12)15-5-1-2-7(8)11-9(15)3-4-13-11/h1-6,13H                                      |
|               | <chem>C12H7N3O</chem>                                                               |         |          |          |          |          |                                                                                                                    |
| <b>q1-29</b>  |    | 27.4315 | 217.1627 | -14.669  | 185.868  | 434.0516 | InChI=1S/C12H7N3O/c16-9-6-8-12-14-10(15(8)12)3-1-2-7-4-5-13-11(7)9/h1-6,13H/b2-1-,8-6-,10-3-                       |
|               | <chem>C12H7N3O</chem>                                                               |         |          |          |          |          |                                                                                                                    |
| <b>q1-36</b>  |   | 21.3166 | 217.4147 | -4.6911  | 165.5887 | 434.2783 | InChI=1S/C12H7N3O/c16-12-8-6-10-14-15(10)9(8)3-1-2-7-4-5-13-11(7)12/h1-6,13H/b2-1-,9-3+                            |
|               | <chem>C12H7N3O</chem>                                                               |         |          |          |          |          |                                                                                                                    |
| <b>X23-27</b> |  | 37.6366 | 265.2255 | -16.4262 | 112.4022 | 434.3538 | InChI=1S/C12H7N3O/c16-12-7-2-1-4-13-8-3-5-14-10(8)11-9(6-7)15(11)12/h1-6,14H/b2-1-,4-1-,7-2-,11-10+,13-4-,13-8-    |
|               | <chem>C12H7N3O</chem>                                                               |         |          |          |          |          |                                                                                                                    |
| <b>o-50</b>   |  | 12.5262 | 142.8663 | -4.0064  | 233.1761 | 435.358  | InChI=1S/C12H7N3O/c16-12-8-6-9(12)14-15-5-1-2-7(8)11-10(15)3-4-13-11/h1-6,13H/b14-9+                               |
|               | <chem>C12H7N3O</chem>                                                               |         |          |          |          |          |                                                                                                                    |
| <b>o-63</b>   |  | 25.8307 | 247.5647 | -14.7347 | 127.9842 | 435.3591 | InChI=1S/C12H7N3O/c16-12-10-8-6-7(8)2-1-5-15(14-10)9-3-4-13-11(9)12/h1-6,13H/b5-1-,7-2-                            |
|               | <chem>C12H7N3O</chem>                                                               |         |          |          |          |          |                                                                                                                    |
| <b>j-3</b>    |  | 58.8966 | 272.8244 | -31.9211 | 86.3458  | 435.6512 | InChI=1S/C12H7N3O/c16-12-10-11(12)15(10)7-2-1-4-13-8-3-5-14-9(8)6-7/h1-6,14H/b2-1-,4-1-,7-2+,7-6+,9-6+,13-4-,13-8+ |
|               | <chem>C12H7N3O</chem>                                                               |         |          |          |          |          |                                                                                                                    |
| <b>x7-19</b>  |  | 54.8848 | 268.6388 | -28.8255 | 112.5158 | 435.9409 | InChI=1S/C12H7N3O/c16-9-3-1-2-7-4-5-13-10(7)12-11(15(9)12)8-6-14-8/h1-6,13H/b3-1-,7-2-,11-8+,12-10+                |
|               | <chem>C12H7N3O</chem>                                                               |         |          |          |          |          |                                                                                                                    |
| <b>B-254</b>  |  | 19.3978 | 119.4070 | 0.2696   | 223.1006 | 436.2248 | InChI=1S/C12H7N3O/c16-11-8-2-1-5-15-6-9(14-12(11)15)10-7(8)3-4-13-10/h1-6,13H                                      |
|               | <chem>C12H7N3O</chem>                                                               |         |          |          |          |          |                                                                                                                    |
| <b>H-80</b>   |  | 15.3772 | 210.2573 | -4.4337  | 163.2048 | 436.311  | InChI=1S/C12H7N3O/c16-12-9-3-1-2-7-6-15(10(7)14-12)11-8(9)4-5-13-11/h1-6,13H/b2-1-,9-3-                            |
|               | <chem>C12H7N3O</chem>                                                               |         |          |          |          |          |                                                                                                                    |
| <b>H11-80</b> |  | 24.1841 | 286.613  | -13.3339 | 87.6126  | 436.3662 | InChI=1S/C12H7N3O/c16-12-11-7(4-5-13-11)8-2-1-3-9(14-8)10-6-15(10)12/h1-6,13H                                      |
|               | <chem>C12H7N3O</chem>                                                               |         |          |          |          |          |                                                                                                                    |
| <b>B-164</b>  |  | 4.1753  | 326.4802 | -3.5774  | 96.0822  | 436.8150 | InChI=1S/C12H7N3O/c16-12-10-8(3-4-13-10)7-2-1-5-15(12)11-9(6-7)14-11/h1-6,13H/b5-1-,7-2+,9-6-                      |
|               | <chem>C12H7N3O</chem>                                                               |         |          |          |          |          |                                                                                                                    |

|               |                                                                                     |          |           |           |           |           |                                                                                                                 |
|---------------|-------------------------------------------------------------------------------------|----------|-----------|-----------|-----------|-----------|-----------------------------------------------------------------------------------------------------------------|
| <b>H-38</b>   | 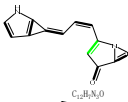   | 33, 1034 | 303, 5849 | -11, 4176 | 95, 9237  | 437, 1871 | InChI=1S/C12H7N3O/c16-10-6-7(15-12(10)14-15)2-1-3-8-9-4-5-13-11(8)9/h1-6, 13H/b2-1-, 8-3-                       |
| <b>A2-3</b>   |    | 40, 1941 | 204, 6816 | -1, 9358  | 116, 1892 | 437, 4215 | InChI=1S/C12H7N3O/c16-12-8-2-1-4-14-11-9(6-15(11)12)10-7(8)3-5-13-10/h1-6, 13H/b4-1-, 8-2-, 14-11-              |
| <b>s11-18</b> |    | 33, 0605 | 213, 4451 | -5, 5896  | 168, 068  | 437, 6464 | InChI=1S/C12H7N3O/c16-12-8-6-9(12)15-10(14-15)3-1-2-7-4-5-13-11(7)8/h1-6, 13H/b3-1-, 7-2-, 11-8-                |
| <b>A2-63</b>  |    | 26, 6227 | 272, 1981 | -11, 0367 | 113, 3979 | 437, 7401 | InChI=1S/C12H7N3O/c16-10-6-9-12-14-4-1-2-8(15(9)12)7-3-5-13-11(7)10/h1-6, 13H                                   |
| <b>I-16</b>   |    | 5, 3445  | 390, 1145 | -1, 2643  | 20, 0589  | 437, 7894 | InChI=1S/C12H7N3O/c16-12-7-6-13-3-1-5-15-8-2-4-14-10(8)11(15)9(7)12/h1-6, 14H/b5-1-, 7-6+, 11-9+, 13-3-         |
| <b>H11-34</b> |    | 6, 1053  | 371, 0272 | -1, 0262  | 50, 7809  | 438, 0128 | InChI=1S/C12H7N3O/c16-12-8-2-1-3-9-10(14-9)6-15(12)11-7(8)4-5-13-11/h1-6, 13H/b3-1-, 8-2-, 10-6+                |
| <b>I-98</b>   |    | 29, 6416 | 240, 3748 | -2, 2587  | 93, 0731  | 438, 3743 | InChI=1S/C12H7N3O/c16-12-10-7-6-9(10)15(5-1-3-14-12)8-2-4-13-11(7)8/h1-6, 13H/b5-1-, 14-3+                      |
| <b>B-24</b>   |   | 13, 5272 | 289, 0356 | -2, 3639  | 110, 6306 | 438, 5470 | InChI=1S/C12H7N3O/c16-10-6-8-12(14-8)15-5-1-2-9(15)7-3-4-13-11(7)10/h1-6, 13H/b8-6+                             |
| <b>o-4</b>    |  | 11, 2385 | 191, 6347 | -4, 238   | 189, 6789 | 438, 6667 | InChI=1S/C12H7N3O/c16-12-7-2-1-5-15-10-3-4-13-9(10)6-8(7)11(12)14-15/h1-6, 13H/b5-1-, 7-2+                      |
| <b>n-40</b>   |  | 29, 388  | 228, 7723 | -10, 501  | 152, 1026 | 438, 9068 | InChI=1S/C12H7N3O/c16-12-9-7-2-1-5-15(14-6-7)8-3-4-13-11(8)10(9)12/h1-6, 13H                                    |
| <b>r-35</b>   |  | 31, 0665 | 281, 8318 | -23, 8393 | 88, 9774  | 438, 9889 | InChI=1S/C12H7N3O/c16-12-8(10-9-6-15(9)10)3-1-2-7-4-5-13-11(7)14-12/h1-6H, (H, 13, 14, 16)/b3-1-, 7-2-, 10-8+   |
| <b>o-27</b>   |  | 9, 2155  | 119, 5684 | -1, 9931  | 257, 9555 | 439, 9163 | InChI=1S/C12H7N3O/c16-11-7-2-1-5-15-9-3-4-13-10(9)8(6-7)14-12(11)15/h1-6, 13H                                   |
| <b>F-37</b>   |  | 17, 2243 | 237, 6246 | -6, 8365  | 154, 3888 | 440, 0133 | InChI=1S/C12H7N3O/c16-11-6-10-9-3-1-2-7(11)8-4-5-13-12(8)14-15(9)10/h1-6H, (H, 13, 14)/b2-1-, 8-7-, 9-3+, 10-6- |
| <b>H-141</b>  |  | 6, 0338  | 390, 3097 | -2, 5098  | 37, 7923  | 440, 3037 | InChI=1S/C12H7N3O/c16-12-10(14-12)7-2-1-3-9-8-4-5-13-11(8)15(9)6-7/h1-6, 13H                                    |
| <b>H-10</b>   |  | 33, 1265 | 305, 2755 | -11, 626  | 97, 7105  | 440, 3121 | InChI=1S/C12H7N3O/c16-11-7(6-15-12(11)14-15)2-1-3-8-9-4-5-13-10(8)9/h1-6, 13H/b2-1-, 8-3-                       |
| <b>H-143</b>  |  | 22, 0742 | 186, 8198 | -12, 9146 | 212, 547  | 440, 5718 | InChI=1S/C12H7N3O/c16-12-11(14-12)15-7-2-1-3-10(15)8-4-5-13-9(8)6-7/h1-6, 13H                                   |
| <b>I-30</b>   |  | 5, 4594  | 420, 9913 | -1, 3202  | 2, 4      | 440, 6082 | InChI=1S/C12H7N3O/c16-12-7-6-13-3-1-5-15-8-2-4-14-10(8)11(15)9(7)12/h1-6, 14H/b5-1-, 7-6+, 11-9+, 13-3+         |
| <b>n-162</b>  |  | 11, 0617 | 142, 8319 | -2, 4058  | 242, 0201 | 440, 8303 | InChI=1S/C12H7N3O/c16-12-7-2-1-5-15-6-14-11(12)9(7)10-8(15)3-4-13-10/h1-6, 13H/b5-1-, 7-2+                      |
| <b>q-40</b>   |  | 25, 3855 | 168, 3784 | -6, 4861  | 220, 3222 | 440, 8509 | InChI=1S/C12H7N3O/c16-10-6-8-11-7(4-5-13-11)2-1-3-9(10)15-12(8)14-15/h1-6, 13H/b2-1-, 9-3+                      |

|                |  |         |          |          |          |          |                                                                                                          |
|----------------|--|---------|----------|----------|----------|----------|----------------------------------------------------------------------------------------------------------|
| <b>H1-71</b>   |  | 27.7442 | 166.2168 | -0.691   | 183.6354 | 440.907  | InChI=1S/C12H7N3O/c16-10-3-1-2-7-8-4-5-13-11(8)12-14-9(7)6-15(10)12/h1-6,13h/b3-1-,7-2-                  |
| <b>H11-38</b>  |  | 18.3831 | 261.2861 | -5.7578  | 143.3085 | 440.9325 | InChI=1S/C12H7N3O/c16-12-9-6-7-2-1-3-10(15(9)12)14-11-8(7)4-5-13-11/h1-6h,(H,13,14)/b9-6-                |
| <b>s11-25</b>  |  | 20.4563 | 280.446  | -7.4178  | 94.2085  | 441.7953 | InChI=1S/C12H7N3O/c16-11-8-3-1-2-7-4-5-13-10(7)12(14-8)15-6-9(11)15/h1-6,13h/b2-1-,3-1-,7-2-,8-3-,12-10- |
| <b>H11-83</b>  |  | 13.1215 | 308.3287 | -3.0582  | 94.3841  | 441.9333 | InChI=1S/C12H7N3O/c16-12-11-7(4-5-13-11)10-3-1-2-8-9(14-8)6-15(10)12/h1-6,13h/b2-1-,9-6+,10-3-           |
| <b>G-49</b>    |  | 19.3638 | 243.3415 | -8.5373  | 164.2615 | 442.3374 | InChI=1S/C12H7N3O/c16-12-11-8-2-1-3-9(14-6-15(11)12)10-7(8)4-5-13-10/h1-6,13h/b1-8+,9-6-                 |
| <b>n-131</b>   |  | 13.6246 | 164.3127 | -3.5853  | 224.3902 | 442.3669 | InChI=1S/C12H7N3O/c16-12-10-7-2-1-5-15(9(10)6-14-7)8-3-4-13-11(8)12/h1-6,13h                             |
| <b>H1-37</b>   |  | 32.0051 | 339.0933 | -0.5383  | 49.937   | 442.7323 | InChI=1S/C12H7N3O/c16-10-3-1-2-9-7-4-5-13-12(7)15(9)6-8-11(10)14-8/h1-6,13h/b3-1-,8-6+,9-2-              |
| <b>B-255</b>   |  | 9.9845  | 121.8987 | -3.1551  | 268.2289 | 444.2806 | InChI=1S/C12H7N3O/c16-12-11-7-2-1-5-15(12)6-9(14-11)10-8(7)3-4-13-10/h1-6,13h                            |
| <b>H1-80</b>   |  | 28.9638 | 387.1369 | -20.9407 | 44.7785  | 444.9692 | InChI=1S/C12H7N3O/c16-11(15-10-6-9(10)14-15)3-1-2-7-8-4-5-13-12(7)8/h1-6,13h/b3-1-,7-2-                  |
| <b>H1-11</b>   |  | 17.29   | 239.3982 | -4.2537  | 168.1118 | 445.0442 | InChI=1S/C12H7N3O/c16-10-3-1-2-7-8-4-5-13-12(8)15(10)6-9-11(7)14-9/h1-6,13h/b3-1-,7-2+                   |
| <b>E-50</b>    |  | 16.0984 | 303.4664 | -10.9586 | 79.9601  | 445.2336 | InChI=1S/C12H7N3O/c16-12-11-8(4-5-13-11)9-3-1-2-7-6-10(7)15(12)14-9/h1-6,13h/b3-1-,7-2-                  |
| <b>H11-89</b>  |  | 20.1185 | 125.5402 | 0.3321   | 232.4967 | 445.44   | InChI=1S/C12H7N3O/c16-12-8-2-1-3-10-14-9(6-15(10)12)11-7(8)4-5-13-11/h1-6,13h                            |
| <b>x5-30</b>   |  | 13.678  | 317.1055 | -7.8027  | 67.6148  | 445.5954 | InChI=1S/C12H7N3O/c16-11-8-3-1-2-7-4-5-13-12(7)14-15-9(6-8)10(11)15/h1-6h,(H,13,14)/b3-1-,7-2-           |
| <b>H11-147</b> |  | 4.2429  | 344.843  | -1.6071  | 84.913   | 445.9834 | InChI=1S/C12H7N3O/c16-12-8-2-1-3-10-14-15(10)6-9(12)11-7(8)4-5-13-11/h1-6,13h/b3-1-,8-2-,9-6-            |
| <b>A2-81</b>   |  | 30.7967 | 381.8482 | -20.3529 | 41.3775  | 445.9847 | InChI=1S/C12H7N3O/c16-11-9-6-15(9)12(11)14-4-1-2-7-8-3-5-13-10(7)8/h1-6,13h/b4-1-,7-2-,14-12-            |
| <b>o-198</b>   |  | 13.2282 | 384.8515 | -3.4294  | 46.4006  | 446.5643 | InChI=1S/C12H7N3O/c16-10-6-7(10)8-2-1-5-15-9-3-4-13-11(9)12(15)14-8/h1-6,13h                             |
| <b>H11-50</b>  |  | 20.3525 | 262.5275 | -6.2512  | 139.5763 | 446.7743 | InChI=1S/C12H7N3O/c16-12-10-6-7-2-1-3-9(15(10)12)8-4-5-13-11(8)14-7/h1-6h,(H,13,14)/b10-6-               |
| <b>o-32</b>    |  | 11.441  | 144.8331 | -3.6187  | 239.6874 | 447.6102 | InChI=1S/C12H7N3O/c16-12-8-6-15-5-1-2-7(11(12)14-8)10-9(15)3-4-13-10/h1-6,13h/b8-6-                      |
| <b>A2-31</b>   |  | 30.9743 | 388.4952 | -20.1535 | 41.3593  | 447.996  | InChI=1S/C12H7N3O/c16-12-11(9-6-15(9)12)13-4-1-2-7-8-3-5-14-10(7)8/h1-6,14h/b4-1-,7-2-,13-11+            |

|                |  |         |          |          |          |          |                                                                                                                           |
|----------------|--|---------|----------|----------|----------|----------|---------------------------------------------------------------------------------------------------------------------------|
| <b>o-131</b>   |  | 5.2523  | 401.8744 | -1.3802  | 17.24    | 448.1023 | InChI=1S/C12H7N3O/c16-11-7-2-1-5-15-9-3-4-13-10(9)12(15)14-6-8(7)11/h1-6,13H/b5-1-,7-2-,8-6-,14-12-                       |
| <b>H11-150</b> |  | 21.2587 | 120.6305 | 0.1132   | 231.3328 | 448.1873 | InChI=1S/C12H7N3O/c16-11-7-2-1-3-10-9(11)6-15(14-10)12-8(7)4-5-13-12/h1-6,13H                                             |
| <b>s11-52</b>  |  | 23.3324 | 226.3885 | -2.0801  | 123.1009 | 448.3755 | InChI=1S/C12H7N3O/c16-12-8-3-1-2-7-4-5-13-10(7)11-9(14-8)6-15(11)12/h1-6,13H/b3-1-,7-2-,11-10+                            |
| <b>q11-29</b>  |  | 23.852  | 179.2223 | -13.0797 | 215.8213 | 448.5412 | InChI=1S/C12H7N3O/c16-11-8-3-1-2-7-4-5-13-10(7)12-14-15(12)9(1)6-8/h1-6,13H/b2-1-,8-3?                                    |
| <b>n-142</b>   |  | 27.9944 | 168.3973 | -11.9776 | 237.6052 | 448.6427 | InChI=1S/C12H7N3O/c16-12-7-2-1-5-15(11)7(8-6-14-8)9-3-4-13-10(9)12/h1-6,13H/b11-8+                                        |
| <b>H11-95</b>  |  | 18.4133 | 423.5314 | -14.2717 | 12.7394  | 448.7571 | InChI=1S/C12H7N3O/c16-12-9(14-12)3-1-2-7-8-4-5-13-11(8)15-6-10(7)15/h1-6,13H/b3-1-,7-2-                                   |
| <b>H1-94</b>   |  | 44.6497 | 310.494  | -27.7063 | 96.2767  | 448.9616 | InChI=1S/C12H7N3O/c16-7(6-10-12-14-15(10)12)2-1-3-8-9-4-5-13-11(8)9/h1-6,13H/b2-1-,8-3-,10-6-                             |
| <b>B-244</b>   |  | 29.8333 | 307.8213 | -12.4353 | 112.7730 | 449.4524 | InChI=1S/C12H7N3O/c16-12-11-9(14-11)6-15(12)5-1-2-7-8-3-4-13-10(7)8/h1-6,13H/b5-1-,7-2-                                   |
| <b>H-122</b>   |  | 7.9072  | 294.471  | -5.2645  | 129.4008 | 450.218  | InChI=1S/C12H7N3O/c16-12-11-14-9-3-1-2-7(15(11)12)6-10-8(9)4-5-13-10/h1-6,13H/b2-1-,3-1-,7-2-,7-6-,9-3-,9-8-,10-6+,14-11+ |
| <b>B-110</b>   |  | 8.4499  | 119.8740 | -3.9032  | 278.1428 | 450.4195 | InChI=1S/C12H7N3O/c16-12-9-6-10-11-7(3-4-13-11)8(14-9)2-1-5-15(10)12/h1-6,13H/b5-1-,8-2-                                  |
| <b>i-15</b>    |  | 21.9471 | 242.6314 | -8.4386  | 155.6394 | 450.7177 | InChI=1S/C12H7N3O/c16-10-6-9-12-11-7(3-5-14-11)13-4-1-2-8(10)15(9)12/h1-6,14H/b4-1-,8-2-,12-11-,13-7+                     |
| <b>H1-129</b>  |  | 37.9257 | 291.8006 | -17.0545 | 122.6116 | 450.8782 | InChI=1S/C12H7N3O/c16-10(9-6-11-14-15(9)11)3-1-2-7-8-4-5-13-12(7)8/h1-6,13H/b3-1-,7-2-                                    |
| <b>X23-36</b>  |  | 35.5755 | 361.6302 | -16.7489 | 48.5656  | 452.1322 | InChI=1S/C12H7N3O/c16-12-9-10-8(3-5-14-10)13-4-1-2-7-6-15(7)11(9)12/h1-6,14H/b2-1-,13-4+                                  |
| <b>n-137</b>   |  | 14.0185 | 253.4141 | -6.434   | 142.7367 | 452.7306 | InChI=1S/C12H7N3O/c16-12-9-7-2-1-5-15(6-14-10(7)9)8-3-4-13-11(8)12/h1-6,13H/b5-1-,7-2-,14-6-                              |
| <b>o-1</b>     |  | 4.3324  | 386.2022 | -1.4882  | 54.5744  | 453.659  | InChI=1S/C12H7N3O/c16-12-7-2-1-5-15-8-3-4-13-11(8)9(15)6-14-10(7)12/h1-6,13H/b5-1-,7-2+,9-6-,14-10+                       |
| <b>i-27</b>    |  | 26.1576 | 396.5689 | -18.8152 | 31.8228  | 453.808  | InChI=1S/C12H7N3O/c16-12-9-2-1-4-13-8-3-5-14-11(8)7-6-10(7)15(9)12/h1-6,14H/b4-1-,9-2-,11-7-,13-8+                        |
| <b>X22-38</b>  |  | 49.2765 | 343.3314 | -24.8616 | 51.2894  | 454.0522 | InChI=1S/C12H7N3O/c16-10-6-7(10)11-9-2-1-4-13-8-3-5-14-12(8)15(9)11/h1-6,14H/b2-1-,13-4-                                  |
| <b>s12-33</b>  |  | 21.5032 | 174.6845 | -9.1315  | 212.826  | 454.0639 | InChI=1S/C12H7N3O/c16-12-10-8-3-1-2-7-4-5-13-9(7)6-15(12)11(10)14-8/h1-6,13H/b3-1-,7-2-,9-6-                              |
| <b>q-7</b>     |  | 14.7354 | 131.0188 | -3.3814  | 240.7674 | 454.7878 | InChI=1S/C12H7N3O/c16-12-9-3-1-2-7-4-5-13-10(7)8-6-15(9)14-11(8)12/h1-6,13H/b2-1-,9-3-                                    |

|                |                                                                                     |          |           |           |           |           |                                                                                                              |
|----------------|-------------------------------------------------------------------------------------|----------|-----------|-----------|-----------|-----------|--------------------------------------------------------------------------------------------------------------|
| <b>H11-20</b>  | 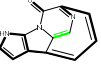   | 18, 5804 | 193, 3616 | -5, 2157  | 200, 3001 | 455, 6606 | InChI=1S/C12H7N3O/c16-12-9-3-1-2-7-8-4-5-13-11(8)15(12)10(7)6-14-9/h1-6, 13H/b2-1-, 3-1-, 7-2-, 9-3-         |
| <b>F-52</b>    |    | 30, 4118 | 116, 3083 | -1, 5718  | 228, 2096 | 455, 9466 | InChI=1S/C12H7N3O/c16-12-7-2-1-3-10-8-4-5-13-11(8)14-9(7)6-15(10)12/h1-6H, (H, 13, 14)                       |
| <b>X23-47</b>  |    | 16, 2578 | 311, 213  | -10, 2721 | 109, 6841 | 456, 3918 | InChI=1S/C12H7N3O/c16-11-7-2-1-4-13-8-3-5-14-12(8)15-9(6-7)10(11)15/h1-6, 14H/b2-1-, 13-4-                   |
| <b>B-85</b>    |    | 20, 6389 | 129, 7882 | 0, 3234   | 227, 3057 | 456, 5246 | InChI=1S/C12H7N3O/c16-12-8-2-1-5-15-10(12)6-9(14-15)11-7(8)3-4-13-11/h1-6, 13H                               |
| <b>B-28</b>    |    | 30, 1443 | 313, 3940 | -12, 3300 | 115, 9743 | 456, 9533 | InChI=1S/C12H7N3O/c16-10-6-9-12(14-9)15(10)5-1-2-7-8-3-4-13-11(7)8/h1-6, 13H/b5-1-, 7-2-                     |
| <b>B-248</b>   |    | 11, 7109 | 302, 0143 | -5, 5247  | 96, 9935  | 457, 0196 | InChI=1S/C12H7N3O/c16-12-10-7(3-4-13-10)8-2-1-5-15-6-9(15)11(12)14-8/h1-6, 13H/b5-1-, 8-2-                   |
| <b>E-1</b>     |    | 12, 8008 | 304, 3642 | -4, 5826  | 123, 9164 | 457, 1528 | InChI=1S/C12H7N3O/c16-11-6-8(11)10-3-1-2-9-7-4-5-13-12(7)15(10)14-9/h1-6, 13H                                |
| <b>E-2</b>     |    | 12, 8031 | 304, 3628 | -4, 5825  | 123, 9200 | 457, 1533 | InChI=1S/C12H7N3O/c16-11-6-10(11)15-9-3-1-2-8(14-15)7-4-5-13-12(7)9/h1-6, 13H                                |
| <b>B-135</b>   |    | 17, 5216 | 232, 6777 | -6, 0462  | 151, 3991 | 457, 1800 | InChI=1S/C12H7N3O/c16-11-10-6-9-7(3-4-13-9)8-2-1-5-15(12)11)14-8/h1-6, 13H/b10-6+                            |
| <b>o-99</b>    |  | 8, 9979  | 374, 1875 | -2, 3464  | 66, 9474  | 457, 508  | InChI=1S/C12H7N3O/c16-12-10(14-12)7-2-1-5-15-8-3-4-13-11(8)9(15)6-7/h1-6, 13H                                |
| <b>E-33</b>    |  | 10, 0664 | 291, 0211 | -6, 3202  | 134, 5538 | 457, 6312 | InChI=1S/C12H7N3O/c16-12-10-6-14-8-2-1-3-9(15)10(12)11-7(8)4-5-13-11/h1-6, 13H/b10-6-, 14-8+                 |
| <b>H1-142</b>  |  | 40, 9193 | 222, 495  | -9, 5011  | 150, 6661 | 457, 6818 | InChI=1S/C12H7N3O/c16-11-3-1-2-8-7-4-5-13-12(7)9-6-10(14-8)15(9)11/h1-6, 13H/b3-1-, 8-2-                     |
| <b>H11-119</b> |  | 18, 6861 | 243, 6485 | -9, 0381  | 153, 2403 | 458, 0606 | InChI=1S/C12H7N3O/c16-11-8-2-1-3-9(15-6-10(11)15)7-4-5-13-12(7)14-8/h1-6H, (H, 13, 14)                       |
| <b>B-5</b>     |  | 45, 4174 | 203, 8970 | -19, 2428 | 193, 2612 | 458, 2123 | InChI=1S/C12H7N3O/c16-10-6-8(10)12-14-9-2-1-5-15(12)11-7(9)3-4-13-11/h1-6, 13H                               |
| <b>H-88</b>    |  | 36, 7731 | 260, 6384 | -19, 5216 | 129, 1949 | 458, 2484 | InChI=1S/C12H7N3O/c16-11-10-8(4-5-13-10)9-3-1-2-7-6-15(7)12(11)14-9/h1-6, 13H/b2-1-, 9-3-                    |
| <b>q-30</b>    |  | 7, 3484  | 339, 3393 | -4, 091   | 94, 3142  | 458, 2538 | InChI=1S/C12H7N3O/c16-12-11(14-12)15-8-3-1-2-7-4-5-13-10(7)9(15)6-8/h1-6, 13H/b2-1-, 3-1-, 7-2-, 8-3+, 10-9- |
| <b>x3-10</b>   |  | 35, 7824 | 124, 9855 | -4, 4295  | 190, 5335 | 458, 5641 | InChI=1S/C12H7N3O/c16-12-7-6-15-5-1-3-13-11(12)9(7)10-8(15)2-4-14-10/h1-6, 14H/b5-1-, 13-3+                  |
| <b>H1-93</b>   |  | 38, 7888 | 297, 1687 | -17, 1392 | 125, 8827 | 458, 8206 | InChI=1S/C12H7N3O/c16-10(9-6-15-12(9)14-15)3-1-2-7-8-4-5-13-11(7)8/h1-6, 13H/b3-1-, 7-2-                     |
| <b>o-139</b>   |  | 13, 2107 | 255, 7504 | -6, 1328  | 154, 8829 | 459, 8502 | InChI=1S/C12H7N3O/c16-12-7-2-1-5-15(14-9-6-8(7)9)10-3-4-13-11(10)12/h1-6, 13H/b5-1-, 7-2-, 14-9-             |

|               |                                                                                     |         |          |          |          |          |                                                                                                                |
|---------------|-------------------------------------------------------------------------------------|---------|----------|----------|----------|----------|----------------------------------------------------------------------------------------------------------------|
| <b>r-13</b>   | 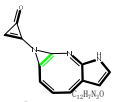   | 48,9877 | 327,9018 | -25,9436 | 77,0131  | 460,3606 | InChI=1S/C12H7N3O/c16-10-6-9(10)15-8-3-1-2-7-4-5-13-11(7)14-12(8)15/h1-6H, (H, 13, 14)                         |
| <b>o-59</b>   |    | 9,8089  | 106,7539 | -4,07    | 296,5981 | 460,6573 | InChI=1S/C12H7N3O/c16-11-8-6-7-2-1-5-15(12(11)14-7)9-3-4-13-10(8)9/h1-6, 13H                                   |
| <b>G1-78</b>  |    | 9,3374  | 158,6259 | -3,8307  | 254,9371 | 460,81   | InChI=1S/C12H7N3O/c16-9-3-1-2-8-7-4-5-13-10(7)11-12(9)15(8)6-14-11/h1-6, 13H                                   |
| <b>G-10</b>   |    | 34,2046 | 236,4184 | -1,7806  | 171,963  | 461,0401 | InChI=1S/C12H7N3O/c16-12-9-3-1-2-8(11(9)15-6-14-15)7-4-5-13-10(7)12/h1-6, 13H                                  |
| <b>o-146</b>  |    | 23,3257 | 285,1249 | -15,2076 | 147,2464 | 461,6591 | InChI=1S/C12H7N3O/c16-10-6-8-11(14-8)7(10)2-1-5-15-9-3-4-13-12(9)15/h1-6, 13H/b5-1-, 7-2-                      |
| <b>B-185</b>  |    | 11,4243 | 162,0162 | -3,6609  | 233,7016 | 462,4641 | InChI=1S/C12H7N3O/c16-11-9-6-14-10(11)7-2-1-5-15(9)12-8(7)3-4-13-12/h1-6, 13H                                  |
| <b>H1-19</b>  |    | 27,3842 | 246,8254 | -5,8965  | 137,6607 | 462,5736 | InChI=1S/C12H7N3O/c16-11-3-1-2-8-7-4-5-13-9(7)6-10(11)15-12(8)14-15/h1-6, 13H/b3-1-, 8-2-                      |
| <b>H-31</b>   |    | 24,1309 | 171,9646 | -3,773   | 231,0461 | 462,6938 | InChI=1S/C12H7N3O/c16-10-6-7-2-1-3-8(10)9-4-5-13-12(9)15-11(7)14-15/h1-6, 13H                                  |
| <b>H11-62</b> |  | 31,3014 | 175,841  | -7,5325  | 198,9007 | 462,9271 | InChI=1S/C12H7N3O/c16-11-6-8-9-2-1-3-10(15(11)14-9)7-4-5-13-12(7)8/h1-6, 13H                                   |
| <b>i-24</b>   |  | 21,0285 | 366,8348 | -16,418  | 63,3099  | 463,1092 | InChI=1S/C12H7N3O/c16-12-11-10-8(3-5-14-10)13-4-1-2-7-6-9(7)15(11)12/h1-6, 14H/b4-1-, 7-2-, 11-10-, 13-8+      |
| <b>k-32</b>   |  | 58,7003 | 327,7866 | -30,6852 | 72,9821  | 464,4104 | InChI=1S/C12H7N3O/c16-9-6-7(9)11-12-10-8(2-4-14-10)13-3-1-5-15(11)12/h1-6, 14H/b5-1-, 13-3-                    |
| <b>q1-6</b>   |  | 13,1394 | 253,5441 | -8,0067  | 187,0666 | 464,5178 | InChI=1S/C12H7N3O/c16-12-10-7(4-5-13-10)2-1-3-9-11-8(14-11)6-15(9)12/h1-6, 13H/b2-1-, 9-3-                     |
| <b>G-2</b>    |  | 4,2059  | 305,752  | -3,4806  | 135,3752 | 464,5826 | InChI=1S/C12H7N3O/c16-12-9-3-1-2-8(11(12)15-6-14-15)7-4-5-13-10(7)9/h1-6, 13H                                  |
| <b>r-12</b>   |  | 50,36   | 331,8359 | -24,3013 | 74,823   | 464,7951 | InChI=1S/C12H7N3O/c16-10-6-8(10)11-9-3-1-2-7-4-5-13-12(7)14-15(9)11/h1-6H, (H, 13, 14)/b3-1-, 7-2-             |
| <b>B-238</b>  |  | 5,6111  | 308,6107 | -3,8788  | 128,2634 | 465,0462 | InChI=1S/C12H7N3O/c16-12-10(14-12)9-6-15-5-1-2-7(9)8-3-4-13-11(8)15/h1-6, 13H                                  |
| <b>H11-37</b> |  | 33,8031 | 362,4331 | -19,9895 | 84,2452  | 465,297  | InChI=1S/C12H7N3O/c16-12-9-6-14-10(15(9)12)3-1-2-7-8-4-5-13-11(7)8/h1-6, 13H/b3-1-, 7-2-                       |
| <b>o-234</b>  |  | 13,8556 | 241,4753 | -5,761   | 171,6303 | 466,3149 | InChI=1S/C12H7N3O/c16-12-11-9(3-4-13-11)15-5-1-2-7-8(6-15)10(7)14-12/h1-6, 13H/b4-10-                          |
| <b>X-4</b>    |  | 34,7281 | 276,2723 | -12,8916 | 128,3278 | 466,5022 | InChI=1S/C12H7N3O/c16-11-9-6-7-2-1-4-14-15(10(9)11)12-8(7)3-5-13-12/h1-6, 13H/b2-1-, 14-4-                     |
| <b>A2-8</b>   |  | 29,6333 | 185,3333 | 0,0617   | 177,2056 | 466,628  | InChI=1S/C12H7N3O/c16-12-9-6-10-13-4-1-2-7(9)8-3-5-14-11(8)15(10)12/h1-6, 14H/b2-1-, 4-1-, 7-2-, 13-4-, 13-10- |

|                |                                                                                     |         |          |          |          |          |                                                                                                     |
|----------------|-------------------------------------------------------------------------------------|---------|----------|----------|----------|----------|-----------------------------------------------------------------------------------------------------|
| <b>H1-30</b>   | 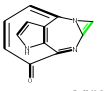   | 14.5001 | 281.2593 | -6.6309  | 128.4592 | 467.514  | InChI=1S/C12H7N3O/c16-9-3-1-2-8-7-4-5-13-11(7)12(9)14-10-6-15(8)10/h1-6,13H/b3-1-,8-2+              |
| <b>n-182</b>   |    | 70.4081 | 106.0874 | -2.6801  | 164.1376 | 467.78   | InChI=1S/C12H7N3O/c16-12-11-9-7(6-14-11)2-1-5-15(12)8-3-4-13-10(8)9/h1-6,13H/b5-1-,7-2-             |
| <b>s12-18</b>  |    | 65.2568 | 321.9806 | -23.7271 | 73.2959  | 468.0456 | InChI=1S/C12H7N3O/c16-12-8-6-9-7(4-5-13-9)2-1-3-10-14-15(10)11(8)12/h1-6,13H/b3-1-,7-2-,9-6+        |
| <b>H-36</b>    |    | 20.1355 | 201.1598 | -5.9547  | 204.0948 | 468.0947 | InChI=1S/C12H7N3O/c16-10-6-7-2-1-3-9(15-12(10)14-15)8-4-5-13-11(7)8/h1-6,13H/b7-6+                  |
| <b>H11-152</b> |    | 15.997  | 208.7885 | -3.9339  | 199.7616 | 469.2695 | InChI=1S/C12H7N3O/c16-11-7-2-1-3-10-14-6-9(11)15(10)12-8(7)4-5-13-12/h1-6,13H/b3-1-,7-2-            |
| <b>H11-28</b>  |    | 16.9922 | 285.1541 | -8.841   | 140.0194 | 469.7302 | InChI=1S/C12H7N3O/c16-12-10-6-7-2-1-3-9(14-15(10)12)11-8(7)4-5-13-11/h1-6,13H/b10-6-,7-9?           |
| <b>B-37</b>    |    | 7.7809  | 244.2875 | -2.9872  | 170.6874 | 470.3701 | InChI=1S/C12H7N3O/c16-10-6-9-11(14-10)7-2-1-5-15(9)12-8(7)3-4-13-12/h1-6,13H                        |
| <b>o-130</b>   |    | 10.3113 | 115.9426 | -2.6044  | 291.9782 | 470.4342 | InChI=1S/C12H7N3O/c16-12-7-2-1-5-15-9-3-4-13-11(9)8(14-7)6-10(12)15/h1-6,13H                        |
| <b>q1-27</b>   |    | 34.9416 | 226.7454 | -11.6374 | 187.3512 | 471.2955 | InChI=1S/C12H7N3O/c16-12-10-7(4-5-13-10)2-1-3-8-6-9-11(14-8)15(9)12/h1-6,13H/b2-1-,8-3-             |
| <b>o-140</b>   |   | 15.12   | 263.9429 | -11.2623 | 148.57   | 471.4065 | InChI=1S/C12H7N3O/c16-12-7-2-1-5-15(10-6-8(10)14-7)9-3-4-13-11(9)12/h1-6,13H/b5-1-,7-2-,14-8-       |
| <b>B-61</b>    |  | 40.5091 | 366.9093 | -24.6072 | 58.9434  | 471.4340 | InChI=1S/C12H7N3O/c16-12-9-6-10(9)14-15(12)5-1-2-7-8-3-4-13-11(7)8/h1-6,13H/b5-1-,7-2-              |
| <b>p1-21</b>   |  | 49.5003 | 337.5004 | -27.4487 | 78.5804  | 471.5873 | InChI=1S/C12H7N3O/c16-9-3-1-2-7-4-5-13-10(7)12-11(14-12)8-6-15(8)9/h1-6,13H/b3-1-,7-2-,12-10-       |
| <b>s11-9</b>   |  | 49.0535 | 361.086  | -16.5826 | 68.6329  | 471.6874 | InChI=1S/C12H7N3O/c16-12-9-6-8(9)11-7(4-5-13-11)2-1-3-10-14-15(10)12/h1-6,13H/b3-1-,7-2-,12-8+      |
| <b>A-64</b>    |  | 23.6511 | 209.1926 | -10.162  | 210.4172 | 473.2291 | InChI=1S/C12H7N3O/c16-11-7-2-1-5-15(10(11)9-6-14-9)12-8(7)3-4-13-12/h1-6,13H/b10-9+                 |
| <b>B-163</b>   |  | 4.9405  | 371.1543 | -3.7825  | 91.1762  | 473.5028 | InChI=1S/C12H7N3O/c16-12-10-9(14-10)6-7-2-1-5-15(12)11-8(7)3-4-13-11/h1-6,13H/b9-6+                 |
| <b>n-43</b>    |  | 26.5761 | 288.6748 | -8.8186  | 140.1245 | 474.8718 | InChI=1S/C12H7N3O/c16-12-9-7-2-1-5-15(6-14-7)8-3-4-13-11(8)10(9)12/h1-6,13H                         |
| <b>o-97</b>    |  | 7.4287  | 326.9653 | -2.9058  | 118.3599 | 475.0624 | InChI=1S/C12H7N3O/c16-12-11(14-12)7-2-1-5-15-6-8(7)10-9(15)3-4-13-10/h1-6,13H                       |
| <b>p1-30</b>   |  | 18.4584 | 280.8982 | -11.3441 | 164.1557 | 475.4006 | InChI=1S/C12H7N3O/c16-10-3-1-2-7-4-5-13-11(7)8-6-9-12(14-10)15(8)9/h1-6,13H/b3-1-,7-2-,11-8+,14-12- |
| <b>G-46</b>    |  | 10.9404 | 298.5454 | -7.0494  | 147.9523 | 475.5558 | InChI=1S/C12H7N3O/c16-12-11-9-3-1-2-7(6-14-15(11)12)10-8(9)4-5-13-10/h1-6,13H/b1-9+,14-6-           |

|                |                                                                                     |         |          |          |          |          |                                                                                                                    |
|----------------|-------------------------------------------------------------------------------------|---------|----------|----------|----------|----------|--------------------------------------------------------------------------------------------------------------------|
| <b>E-38</b>    |    | 13.639  | 239.1646 | -6.0659  | 198.0443 | 478.8388 | InChI=1S/C12H7N3O/c16-11-6-10-9-3-1-2-8(14-11)7-4-5-13-12(7)15(9)10/h1-6,13H/b2-1-,9-3-,10-6+,14-8-                |
|                | $C_{12}H_7N_3O$                                                                     |         |          |          |          |          |                                                                                                                    |
| <b>H1-126</b>  |    | 19.6108 | 251.7064 | -11.3912 | 165.5354 | 476.2105 | InChI=1S/C12H7N3O/c16-11-3-1-2-8-7-4-5-13-9(7)6-10-12(14-8)15(10)11/h1-6,13H/b3-1-,8-2-                            |
|                | $C_{12}H_7N_3O$                                                                     |         |          |          |          |          |                                                                                                                    |
| <b>I-91</b>    |    | 14.6465 | 169.7737 | -4.5927  | 245.7693 | 476.2608 | InChI=1S/C12H7N3O/c16-12-9-6-7-10(12)11-8(2-4-14-11)15(9)5-1-3-13-7/h1-6,14H/b5-1-,13-3-                           |
|                | $C_{12}H_7N_3O$                                                                     |         |          |          |          |          |                                                                                                                    |
| <b>p1-53</b>   |    | 19.3993 | 209.3147 | -11.038  | 234.1386 | 476.3942 | InChI=1S/C12H7N3O/c16-9-3-1-2-7-4-5-13-10(7)11-12-14-8(9)6-15(11)12/h1-6,13H/b3-1-,7-2-,11-10+                     |
|                | $C_{12}H_7N_3O$                                                                     |         |          |          |          |          |                                                                                                                    |
| <b>H-147</b>   |    | 25.0168 | 439.3958 | -17.3921 | 14.729   | 476.3971 | InChI=1S/C12H7N3O/c16-12-11(14-12)10-8(4-5-13-10)9-3-1-2-7-6-15(7)9/h1-6,13H                                       |
|                | $C_{12}H_7N_3O$                                                                     |         |          |          |          |          |                                                                                                                    |
| <b>s12-31</b>  |    | 27.1816 | 363.1546 | -16.5929 | 78.3867  | 476.74   | InChI=1S/C12H7N3O/c16-12-11-10(15(11)12)8-3-1-2-7-4-5-13-9(7)6-14-8/h1-6,13H/b2-1-,3-1-,7-2-,8-3-,9-6+,14-6-,14-8+ |
|                | $C_{12}H_7N_3O$                                                                     |         |          |          |          |          |                                                                                                                    |
| <b>o-96</b>    |    | 70.2255 | 129.1134 | -0.3704  | 173.36   | 477.0705 | InChI=1S/C12H7N3O/c16-12-9-6-7-8(14-9)2-1-5-15(12)10-3-4-13-11(7)10/h1-6,13H/b5-1-,8-2+                            |
|                | $C_{12}H_7N_3O$                                                                     |         |          |          |          |          |                                                                                                                    |
| <b>H-6</b>     |    | 23.0429 | 189.5113 | -6.0834  | 231.6986 | 477.2086 | InChI=1S/C12H7N3O/c16-11-7-2-1-3-9(12-14-15(12)6-7)8-4-5-13-10(8)11/h1-6,13H/b2-1-,7-6-,9-3-                       |
|                | $C_{12}H_7N_3O$                                                                     |         |          |          |          |          |                                                                                                                    |
| <b>H-3</b>     |    | 22.9858 | 232.2597 | -3.4305  | 188.7217 | 477.3862 | InChI=1S/C12H7N3O/c16-11-7-2-1-3-8(11)9-4-5-13-12(9)15-10(6-7)14-15/h1-6,13H/b7-6-                                 |
|                | $C_{12}H_7N_3O$                                                                     |         |          |          |          |          |                                                                                                                    |
| <b>B-33</b>    |   | 11.4094 | 237.6571 | -6.0927  | 188.2746 | 477.4251 | InChI=1S/C12H7N3O/c16-10-6-9-12-14-8(2-1-5-15(9)12)7-3-4-13-11(7)10/h1-6,13H/b9-6-                                 |
|                | $C_{12}H_7N_3O$                                                                     |         |          |          |          |          |                                                                                                                    |
| <b>B-88</b>    |  | 14.1308 | 178.1172 | -5.6147  | 226.8957 | 477.4608 | InChI=1S/C12H7N3O/c16-12-10-6-9(14-12)7-2-1-5-15(10)11-8(7)3-4-13-11/h1-6,13H                                      |
|                | $C_{12}H_7N_3O$                                                                     |         |          |          |          |          |                                                                                                                    |
| <b>H11-133</b> |  | 44.6084 | 264.607  | -19.612  | 151.7783 | 477.5938 | InChI=1S/C12H7N3O/c16-11-6-10(11)15-9-3-1-2-8(14-15)12-7(9)4-5-13-12/h1-6,13H                                      |
|                | $C_{12}H_7N_3O$                                                                     |         |          |          |          |          |                                                                                                                    |
| <b>B-206</b>   |  | 20.4377 | 296.6558 | -9.7353  | 127.1744 | 478.1293 | InChI=1S/C12H7N3O/c16-11-8-6-15-5-1-2-9(15)7-3-4-13-12(7)14-10(8)11/h1-6,13H/b8-6+,14-10+                          |
|                | $C_{12}H_7N_3O$                                                                     |         |          |          |          |          |                                                                                                                    |
| <b>x5-34</b>   |  | 32.1173 | 416.6908 | -22.01   | 30.7674  | 478.2888 | InChI=1S/C12H7N3O/c16-12-10-9-6-8(9)3-1-2-7-4-5-13-11(7)14-15(10)12/h1-6H,13,14/b3-1-,7-2-,10-9-                   |
|                | $C_{12}H_7N_3O$                                                                     |         |          |          |          |          |                                                                                                                    |
| <b>x7-46</b>   |  | 16.0951 | 263.5092 | -11.2466 | 187.3522 | 478.7525 | InChI=1S/C12H7N3O/c16-8-3-1-2-7-4-5-13-9(7)11-12-10(8)14-6-15(11)12/h1-6,13H/b3-1-,7-2-,11-9-                      |
|                | $C_{12}H_7N_3O$                                                                     |         |          |          |          |          |                                                                                                                    |
| <b>H11-23</b>  |  | 26.5115 | 197.4967 | -9.2987  | 196.9212 | 479.0314 | InChI=1S/C12H7N3O/c16-12-9-3-1-2-7-8-4-5-13-11(8)15(12)6-10(7)14-9/h1-6,13H                                        |
|                | $C_{12}H_7N_3O$                                                                     |         |          |          |          |          |                                                                                                                    |
| <b>A1-30</b>   |  | 32.3166 | 264.6705 | -12.9051 | 156.5332 | 479.9345 | InChI=1S/C12H7N3O/c16-12-11-8-6-13-4-1-2-9(15(11)12)7-3-5-14-10(7)8/h1-6,14H/b4-1-,9-2-,13-6-                      |
|                | $C_{12}H_7N_3O$                                                                     |         |          |          |          |          |                                                                                                                    |
| <b>B-38</b>    |  | 26.3658 | 323.4106 | -14.1996 | 131.4817 | 480.8151 | InChI=1S/C12H7N3O/c16-10-6-9-12(14-10)15(9)5-1-2-7-8-3-4-13-11(7)8/h1-6,13H/b5-1-,7-2-                             |
|                | $C_{12}H_7N_3O$                                                                     |         |          |          |          |          |                                                                                                                    |
| <b>H1-138</b>  |  | 36.5188 | 170.9108 | -4.1722  | 245.6742 | 481.7835 | InChI=1S/C12H7N3O/c16-10-3-1-2-9-7-4-5-13-12(7)8(10)6-11-14-15(9)11/h1-6,13H/b3-1-,9-2+                            |
|                | $C_{12}H_7N_3O$                                                                     |         |          |          |          |          |                                                                                                                    |



|               |                                                                                     |         |          |          |          |          |                                                                                                               |
|---------------|-------------------------------------------------------------------------------------|---------|----------|----------|----------|----------|---------------------------------------------------------------------------------------------------------------|
| <b>H11-39</b> |    | 14,995  | 335,5305 | -8,837   | 105,4118 | 482,2364 | InChI=1S/C12H7N3O/c16-12-10-6-9-7(4-5-13-9)8-2-1-3-11(14-8)15(10)12/h1-6,13H/b10-6-                           |
| <b>s11-2</b>  |    | 6,4251  | 360,3669 | -3,9391  | 95,202   | 482,5814 | InChI=1S/C12H7N3O/c16-12-9-6-8-3-1-2-7-4-5-13-10(7)11(14-8)15(9)12/h1-6,13H/b2-1-,3-1-,7-2-,8-3-,11-10-       |
| <b>A-108</b>  |    | 5,3993  | 305,6151 | -3,8571  | 149,2747 | 482,8402 | InChI=1S/C12H7N3O/c16-11-7-2-1-5-15(10(11)9-6-14-9)12-8(7)3-4-13-12/h1-6,13H/b10-9-                           |
| <b>o-124</b>  |    | 38,2443 | 359,5606 | -23,7052 | 77,9954  | 483,0718 | InChI=1S/C12H7N3O/c16-11-7-6-9(7)14-8(11)2-1-5-15-10-3-4-13-12(10)15/h1-6,13H/b5-1-,8-2-                      |
| <b>o-197</b>  |    | 43,6927 | 202,0178 | -19,8559 | 215,3135 | 483,3586 | InChI=1S/C12H7N3O/c16-10-6-7(10)12-14-8-2-1-5-15(12)9-3-4-13-11(8)9/h1-6,13H                                  |
| <b>x4-41</b>  |    | 27,4234 | 262,5196 | -8,2632  | 148,5392 | 484,3867 | InChI=1S/C12H7N3O/c16-12-11-10-9-7(4-5-13-9)2-1-3-8(6-14-10)15(11)12/h1-6,13H/b2-1-,8-3+                      |
| <b>o-183</b>  |    | 11,2003 | 177,7562 | -2,6419  | 240,0897 | 484,6597 | InChI=1S/C12H7N3O/c16-11-8-6-7-2-1-5-15(12(7)14-8)9-3-4-13-10(9)11/h1-6,13H                                   |
| <b>X23-20</b> |    | 32,7579 | 404,5339 | -22,1232 | 57,4884  | 484,9333 | InChI=1S/C12H7N3O/c16-12-10-8-6-7(8)2-1-4-13-9-3-5-14-11(9)15(10)12/h1-6,14H/b2-1-,10-8-,13-4-                |
| <b>X22-60</b> |   | 50,9748 | 312,0827 | -23,2406 | 103,4997 | 484,9758 | InChI=1S/C12H7N3O/c16-11-7-2-1-4-13-8-3-5-14-12(8)15-6-9(15)10(7)11/h1-6,14H/b2-1-,13-4-                      |
| <b>o-40</b>   |  | 6,8449  | 315,8798 | -2,7449  | 137,7514 | 485,0558 | InChI=1S/C12H7N3O/c16-12-8-6-7-2-1-5-15(14-11(8)12)9-3-4-13-10(7)9/h1-6,13H/b8-6-,14-11+                      |
| <b>H11-49</b> |  | 9,7741  | 296,0713 | -4,2852  | 161,6086 | 485,8526 | InChI=1S/C12H7N3O/c16-12-10-6-14-8-2-1-3-9(15(10)12)7-4-5-13-11(7)8/h1-6,13H/b10-6-,14-8?                     |
| <b>x4-34</b>  |  | 18,8643 | 265,9221 | -6,7289  | 179,5035 | 486,3198 | InChI=1S/C12H7N3O/c16-12-11-8-6-14-9(15(11)12)3-1-2-7-4-5-13-10(7)8/h1-6,13H/b2-1-,9-3+                       |
| <b>H-8</b>    |  | 15,5544 | 262,4972 | -6,0425  | 169,8835 | 486,3522 | InChI=1S/C12H7N3O/c16-11-7-2-1-3-10(15-12(11)14-15)8-4-5-13-9(8)6-7/h1-6,13H/b2-1-,3-1-,7-2-,9-6+,10-3+,10-8+ |
| <b>o-108</b>  |  | 25,2097 | 413,0662 | -15,6831 | 35,0456  | 486,6476 | InChI=1S/C12H7N3O/c16-12-11(14-12)15-5-1-2-7-6-8(7)10-9(15)3-4-13-10/h1-6,13H/b5-1-,7-2-                      |
| <b>H-111</b>  |  | 13,7764 | 286,5892 | -7,3514  | 163,5519 | 487,8977 | InChI=1S/C12H7N3O/c16-12-11-14-9-3-1-2-7(6-15(11)12)10-8(9)4-5-13-10/h1-6,13H/b7-6?,14-11-                    |
| <b>o-250</b>  |  | 7,7451  | 243,8332 | -2,8344  | 191,2963 | 488,064  | InChI=1S/C12H7N3O/c16-10-6-8-7-2-1-5-15(12(8)14-10)9-3-4-13-11(7)9/h1-6,13H                                   |
| <b>H-85</b>   |  | 7,0181  | 408,587  | -1,5677  | 31,0612  | 488,6959 | InChI=1S/C12H7N3O/c16-11-10-9(4-5-13-10)7-2-1-3-8(6-7)15-12(11)14-15/h1-6,13H                                 |
| <b>p1-10</b>  |  | 19,971  | 276,2716 | -11,9098 | 174,1788 | 489,6852 | InChI=1S/C12H7N3O/c16-10-3-1-2-7-4-5-13-11(7)12-8-6-9(14-10)15(8)12/h1-6,13H/b3-1-,7-2-,12-11+,14-9-          |
| <b>B-35</b>   |  | 29,4666 | 261,6122 | -12,4034 | 153,3560 | 490,6897 | InChI=1S/C12H7N3O/c16-10-6-9-12-14-11-8(3-4-13-11)7(10)2-1-5-15(9)12/h1-6,13H/b5-1-,7-2-,9-6+,14-12+          |

|               |                                                                                     |          |           |           |           |           |                                                                                                                      |
|---------------|-------------------------------------------------------------------------------------|----------|-----------|-----------|-----------|-----------|----------------------------------------------------------------------------------------------------------------------|
| <b>B-84</b>   |    | 19, 8068 | 199, 8298 | -5, 9387  | 218, 6794 | 490, 7781 | InChI=1S/C12H7N3O/c16-12-9-6-10-14-8(2-1-5-15(9)10)7-3-4-13-11(7)12/h1-6, 13H                                        |
| <b>B-211</b>  |    | 20, 9676 | 208, 0068 | -4, 3459  | 198, 6477 | 491, 8809 | InChI=1S/C12H7N3O/c16-10-7-2-1-5-15-6-9(10)12(15)14-11-8(7)3-4-13-11/h1-6, 13H/b5-1-, 7-2-                           |
| <b>I-13</b>   |    | 20, 6709 | 321, 7143 | -9, 5137  | 125, 8399 | 492, 3697 | InChI=1S/C12H7N3O/c16-12-9-6-7-2-1-4-13-8-3-5-14-10(8)11(7)15(9)12/h1-6, 14H/b2-1-, 4-1-, 7-2-, 11-10-, 13-4-, 13-8- |
| <b>H-20</b>   |    | 29, 6734 | 169, 5819 | -1, 364   | 186, 8487 | 492, 8094 | InChI=1S/C12H7N3O/c16-12-7-2-1-3-10-8-4-5-13-11(8)9(6-7)14-15(10)12/h1-6, 13H                                        |
| <b>B-150</b>  |    | 3, 8110  | 316, 3044 | -2, 4339  | 160, 6584 | 492, 9003 | InChI=1S/C12H7N3O/c16-11-9-6-7-2-1-5-15(14-10(9)11)12-8(7)3-4-13-12/h1-6, 13H/b9-6+, 14-10+                          |
| <b>E-61</b>   |    | 32, 8075 | 190, 4475 | -4, 7519  | 171, 8887 | 493, 1829 | InChI=1S/C12H7N3O/c16-12-8-2-1-3-9-7-4-5-13-11(7)15(12)6-10(8)14-9/h1-6, 13H                                         |
| <b>k-41</b>   |    | 33, 5864 | 401, 2117 | -22, 4158 | 64, 0164  | 493, 3655 | InChI=1S/C12H7N3O/c16-12-11-8-6-7(8)10-9(2-4-14-10)13-3-1-5-15(11)12/h1-6, 14H/b5-1-, 11-8-, 13-3+                   |
| <b>n-149</b>  |    | 2, 7566  | 323, 3734 | -2, 1323  | 152, 3304 | 493, 6298 | InChI=1S/C12H7N3O/c16-12-7-2-1-5-15-9-3-4-13-11(9)8(6-14-15)10(7)12/h1-6, 13H/b5-1-, 7-2-, 10-8-                     |
| <b>H11-S</b>  |    | 15, 0025 | 331, 0532 | -8, 8023  | 103, 4357 | 493, 6742 | InChI=1S/C12H7N3O/c16-12-14-9-3-1-2-7(10-6-15(10)12)8-4-5-13-11(8)9/h1-6, 13H/b14-9+                                 |
| <b>B-103</b>  |   | 44, 3322 | 409, 5198 | -24, 5352 | 46, 3141  | 493, 8548 | InChI=1S/C12H7N3O/c16-12-14-9-6-10(9)15(12)5-1-2-7-8-3-4-13-11(7)8/h1-6, 13H/b5-1-, 7-2-                             |
| <b>r-17</b>   |  | 41, 5179 | 384, 9292 | -21, 7348 | 55, 8266  | 493, 9054 | InChI=1S/C12H7N3O/c16-12-9-6-8(9)10-3-1-2-7-4-5-13-11(7)14-15(10)12/h1-6H, (H, 13, 14)/b3-1-, 7-2-                   |
| <b>F-4</b>    |  | 6, 103   | 337, 8632 | -4, 9206  | 140, 2904 | 494, 3954 | InChI=1S/C12H7N3O/c16-11-7-2-1-3-10-8-4-5-13-12(8)14-15(10)6-9(7)11/h1-6H, (H, 13, 14)/b3-1-, 7-2+, 9-6+             |
| <b>G1-58</b>  |  | 8, 9592  | 381, 9419 | -4, 0671  | 93, 0752  | 494, 5243 | InChI=1S/C12H7N3O/c16-10-3-1-2-7-8-4-5-13-12(8)15(10)11(7)9-6-14-9/h1-6, 13H/b11-9+                                  |
| <b>H11-96</b> |  | 13, 8205 | 457, 5465 | -9, 0367  | 14, 7483  | 495, 6627 | InChI=1S/C12H7N3O/c16-12-8(14-12)2-1-3-9-7-4-5-13-11(7)10-6-15(9)10/h1-6, 13H/b2-1-, 9-3-                            |
| <b>r1-19</b>  |  | 30, 2093 | 346, 7206 | -20, 16   | 84, 0866  | 495, 7694 | InChI=1S/C12H7N3O/c16-9-3-1-2-7-4-5-13-12(7)14-10(9)11-8-6-15(8)11/h1-6H, (H, 13, 14)/b3-1-, 7-2-, 11-10+            |
| <b>r1-34</b>  |  | 30, 2095 | 346, 7198 | -20, 1599 | 84, 0802  | 495, 7694 | InChI=1S/C12H7N3O/c16-9-3-1-2-7-4-5-13-12(7)14-10(9)11-8-6-15(8)11/h1-6H, (H, 13, 14)/b3-1-, 7-2-, 11-10-            |
| <b>H-64</b>   |  | 15, 3087 | 176, 3736 | -4, 2285  | 258, 9622 | 497, 6912 | InChI=1S/C12H7N3O/c16-11-8-3-1-2-7-6-10(11)14-15(7)12-9(8)4-5-13-12/h1-6, 13H/b2-1-, 8-3-                            |
| <b>r-5</b>    |  | 13, 101  | 294, 0564 | -10, 3844 | 183, 9353 | 497, 7215 | InChI=1S/C12H7N3O/c16-11-8-6-15-9(10(8)11)3-1-2-7-4-5-13-12(7)14-15/h1-6H, (H, 13, 14)/b3-1-, 7-2-                   |
| <b>H-128</b>  |  | 32, 7791 | 365, 9397 | -19, 5399 | 110, 5883 | 498, 8001 | InChI=1S/C12H7N3O/c16-12-11-14-6-7(15(11)12)2-1-3-8-9-4-5-13-10(8)9/h1-6, 13H/b2-1-, 8-3-                            |

|               |                                                                                     |         |          |          |          |          |                                                                                                           |
|---------------|-------------------------------------------------------------------------------------|---------|----------|----------|----------|----------|-----------------------------------------------------------------------------------------------------------|
| <b>H-161</b>  | 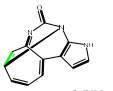   | 27.464  | 216.3679 | -14.0635 | 211.2627 | 499.5639 | InChI=1S/C12H7N3O/c16-12-14-10-6-7-2-1-3-8(10)9-4-5-13-11(9)15(7)12/h1-6,13H                              |
| <b>s11-38</b> |    | 44.5491 | 170.8566 | -8.8544  | 209.7928 | 500.351  | InChI=1S/C12H7N3O/c16-12-8-6-10-14-9(15(10)12)3-1-2-7-4-5-13-11(7)8/h1-6,13H/b2-1-,3-1-,7-2-,9-3-,11-8+   |
| <b>H1-23</b>  |    | 11.6836 | 291.1883 | -4.1     | 168.9386 | 500.6245 | InChI=1S/C12H7N3O/c16-7-2-1-3-9-8-4-5-13-11(8)10(6-7)15-12(9)14-15/h1-6,13H/b2-1-,9-3-,10-6+              |
| <b>o-11</b>   |    | 30.069  | 327.9502 | -12.1056 | 124.1393 | 500.7148 | InChI=1S/C12H7N3O/c16-11-7(6-8-10(11)14-8)2-1-5-15-9-3-4-13-12(9)15/h1-6,13H/b5-1-,7-2+                   |
| <b>q-21</b>   |    | 52.026  | 385.49   | -15.1559 | 56.5832  | 500.7518 | InChI=1S/C12H7N3O/c16-12-11-8(14-11)3-1-2-7-4-5-13-10(7)9-6-15(9)12/h1-6,13H/b2-1-,8-3+                   |
| <b>C-57</b>   |    | 18.3781 | 282.3149 | -6.4475  | 172.8341 | 502.1458 | InChI=1S/C12H7N3O/c16-12-11-8-2-1-4-13-9(6-15(11)12)10-7(8)3-5-14-10/h1-6,14H/b2-1-,13-4-                 |
| <b>E-7</b>    |    | 27.2909 | 194.6153 | -3.7697  | 188.6216 | 502.7499 | InChI=1S/C12H7N3O/c16-12-8-6-15-10(12)3-1-2-9(14-15)7-4-5-13-11(7)8/h1-6,13H                              |
| <b>s12-19</b> |    | 62.4404 | 341.5027 | -20.1788 | 98.5112  | 502.7801 | InChI=1S/C12H7N3O/c16-12-8-6-9-7(4-5-13-9)2-1-3-10-14-15(10)11(8)12/h1-6,13H/b3-1-,7-2-,9-6-              |
| <b>n-141</b>  |   | 4.4875  | 301.913  | -3.3071  | 176.2196 | 503.378  | InChI=1S/C12H7N3O/c16-12-7-2-1-5-15(11(7)8-6-14-8)9-3-4-13-10(9)12/h1-6,13H/b11-8-                        |
| <b>A2-22</b>  |  | 20.1301 | 476.7627 | -12.9076 | 19.0512  | 503.5611 | InChI=1S/C12H7N3O/c16-12-9-6-10(15(9)12)13-4-1-2-7-8-3-5-14-11(7)8/h1-6,14H/b4-1-,7-2-,13-10+             |
| <b>o-101</b>  |  | 64.4286 | 385.3272 | -42.6067 | 60.359   | 503.7176 | InChI=1S/C12H7N3O/c16-12-10(14-12)8-6-7(8)2-1-5-15-9-3-4-13-11(9)15/h1-6,13H/b5-1-,7-2+                   |
| <b>A1-22</b>  |  | 41.1515 | 436.9778 | -24.6839 | 39.6379  | 503.8292 | InChI=1S/C12H7N3O/c16-12-11-9(15(11)12)6-13-4-1-2-7-8-3-5-14-10(7)8/h1-6,14H/b4-1-,7-2-,13-6+             |
| <b>A2-23</b>  |  | 23.1784 | 269.3333 | -11.935  | 188.8555 | 504.3166 | InChI=1S/C12H7N3O/c16-12-9-6-7-2-1-4-14-11(15(9)12)10-8(7)3-5-13-10/h1-6,13H/b2-1-,4-1-,7-2-,14-4-,14-11+ |
| <b>B-139</b>  |  | 22.1829 | 377.2852 | -2.7719  | 77.4439  | 504.5369 | InChI=1S/C12H7N3O/c16-12-11-9(14-11)6-8-7(3-4-13-8)10-2-1-5-15(10)12/h1-6,13H/b9-6+                       |
| <b>B-256</b>  |  | 11.6134 | 449.5147 | -9.6907  | 24.7796  | 506.5129 | InChI=1S/C12H7N3O/c16-12-11(14-12)7-2-1-5-15-6-9(15)10-8(7)3-4-13-10/h1-6,13H/b5-1-,7-2+                  |
| <b>q-28</b>   |  | 11.9572 | 450.3436 | -9.8034  | 23.2338  | 506.9304 | InChI=1S/C12H7N3O/c16-12-11(14-12)8-3-1-2-7-4-5-13-10(7)9-6-15(8)9/h1-6,13H/b2-1-,8-3-                    |
| <b>A2-46</b>  |  | 41.078  | 189.4408 | -1.688   | 175.4447 | 507.3965 | InChI=1S/C12H7N3O/c16-10-7-2-1-4-13-12-9(10)6-15(12)11-8(7)3-5-14-11/h1-6,14H/b4-1-,7-2-,13-12+           |
| <b>F-47</b>   |  | 30.4995 | 346.4942 | -7.6898  | 63.4116  | 507.5261 | InChI=1S/C12H7N3O/c16-11-7-2-1-3-9(11)15-6-10(15)14-12-8(7)4-5-13-12/h1-6H,13(14)/b8-7-                   |
| <b>A-26</b>   |  | 17.2088 | 313.7283 | -9.8066  | 129.7395 | 508.5933 | InChI=1S/C12H7N3O/c16-9-6-14-12-11-10-8(3-4-13-10)7(9)2-1-5-15(11)12/h1-6,13H/b5-1-,7-2-,14-6-            |

|              |                                                                                                              |         |          |          |          |          |                                                                                                         |
|--------------|--------------------------------------------------------------------------------------------------------------|---------|----------|----------|----------|----------|---------------------------------------------------------------------------------------------------------|
| <b>B-171</b> | <br><chem>C12H9N3O</chem>   | 7.6313  | 370.6679 | -3.3594  | 107.5132 | 508.6998 | InChI=1S/C12H7N3O/c16-12-11(14-12)15-5-1-2-7-6-9(15)10-8(7)3-4-13-10/h1-6,13H                           |
| <b>o-187</b> | <br><chem>C12H9N3O</chem>   | 44.7844 | 274.2274 | -19.4033 | 168.2264 | 509.6677 | InChI=1S/C12H7N3O/c16-10-6-8(10)11-7-2-1-5-15(14-11)9-3-4-13-12(7)9/h1-6,13H                            |
| <b>B-157</b> | <br><chem>C12H9N3O</chem>   | 64.6153 | 131.3070 | -2.9553  | 207.3351 | 510.2658 | InChI=1S/C12H7N3O/c16-12-9-6-7-2-1-5-15(12)11(14-9)10-8(7)3-4-13-10/h1-6,13H/b5-1-,7-2+                 |
| <b>q-48</b>  | <br><chem>C12H9N3O</chem>   | 28.9304 | 422.7677 | -18.5593 | 59.0598  | 510.6603 | InChI=1S/C12H7N3O/c16-12-10-3-1-2-7-4-5-13-11(7)8-6-9(8)14-15(10)12/h1-6,13H/b2-1-,10-3-,14-9-          |
| <b>C-56</b>  | <br><chem>C12H9N3O</chem>   | 24.1269 | 291.8084 | -9.1694  | 156.8045 | 511.7807 | InChI=1S/C12H7N3O/c16-12-11-8-2-1-4-13-6-9(15(11)12)10-7(8)3-5-14-10/h1-6,14H/b2-1-,9-6-,13-4-          |
| <b>H-32</b>  | <br><chem>C12H9N3O</chem>   | 17.3203 | 250.6551 | -1.6068  | 221.3161 | 511.793  | InChI=1S/C12H7N3O/c16-10-6-7-2-1-3-8(10)9-4-5-13-11(9)12-14-15(7)12/h1-6,13H                            |
| <b>B-207</b> | <br><chem>C12H9N3O</chem>   | 3.3676  | 314.4998 | -2.0115  | 172.9804 | 513.2982 | InChI=1S/C12H7N3O/c16-11-8-6-15-5-1-2-9(14-10(8)11)7-3-4-13-12(7)15/h1-6,13H/b8-6+,14-10+               |
| <b>o-66</b>  | <br><chem>C12H9N3O</chem>   | 26.9378 | 322.9294 | -7.3883  | 117.0577 | 514.0534 | InChI=1S/C12H7N3O/c16-12-10-8(14-10)6-7-2-1-5-15(7)9-3-4-13-11(9)12/h1-6,13H/b8-6+                      |
| <b>B-243</b> | <br><chem>C12H9N3O</chem>   | 5.3702  | 309.6318 | -2.5067  | 172.2856 | 514.3673 | InChI=1S/C12H7N3O/c16-11-7-2-1-5-15(6-9-10(11)14-9)12-8(7)3-4-13-12/h1-6,13H/b9-6+                      |
| <b>E-30</b>  | <br><chem>C12H9N3O</chem> | 14.3732 | 348.9453 | -7.2207  | 108.6946 | 514.3833 | InChI=1S/C12H7N3O/c16-12-10-6-7-2-1-3-9(14-15(10)12)8-4-5-13-11(7)8/h1-6,13H/b10-6-,14-9+               |
| <b>H-137</b> | <br><chem>C12H9N3O</chem> | 23.3864 | 228.3339 | -7.2017  | 183.9421 | 514.6981 | InChI=1S/C12H7N3O/c16-12-10-8-3-1-2-7(14-10)6-15(12)11-9(8)4-5-13-11/h1-6,13H                           |
| <b>A-6</b>   | <br><chem>C12H9N3O</chem> | 17.5678 | 320.6604 | -7.3681  | 132.9228 | 517.1849 | InChI=1S/C12H7N3O/c16-9-6-15-8-2-1-5-14-11(9)12(14,15)10-7(8)3-4-13-10/h1-6,13H                         |
| <b>A-15</b>  | <br><chem>C12H9N3O</chem> | 17.5698 | 320.6424 | -7.3694  | 132.9357 | 517.1849 | InChI=1S/C12H7N3O/c16-9-6-14-8-2-1-5-15-11(9)12(15)10-7(8)3-4-13-10/h1-6,13H/b5-1-,8-2-,14-6-           |
| <b>H-136</b> | <br><chem>C12H9N3O</chem> | 32.2381 | 410.5806 | -18.6836 | 85.3755  | 517.428  | InChI=1S/C12H7N3O/c16-12-11-14-7(6-15(11)12)2-1-3-8-9-4-5-13-10(8)9/h1-6,13H/b2-1-,8-3-                 |
| <b>o-169</b> | <br><chem>C12H9N3O</chem> | 44.0592 | 390.8025 | -26.8    | 72.7839  | 517.4701 | InChI=1S/C12H7N3O/c16-12-7(8-6-9(8)14-12)2-1-5-15-10-3-4-13-11(10)15/h1-6,13H/b5-1-,7-2+                |
| <b>H-5</b>   | <br><chem>C12H9N3O</chem> | 19.8938 | 224.9747 | -10.5674 | 239.9182 | 518.1268 | InChI=1S/C12H7N3O/c16-12-7-2-1-3-9(15-10(6-7)14-15)8-4-5-13-11(8)12/h1-6,13H/b2-1-,7-6-,9-3+            |
| <b>C-4</b>   | <br><chem>C12H9N3O</chem> | 21.1163 | 289.4894 | -9.0025  | 174.9886 | 518.8057 | InChI=1S/C12H7N3O/c16-11-9-6-15-12-8(3-5-13-12)7(10(9)11)2-1-4-14-15/h1-6,13H/b2-1-,14-4-               |
| <b>B-247</b> | <br><chem>C12H9N3O</chem> | 7.1070  | 401.5440 | -5.4404  | 86.0725  | 519.4280 | InChI=1S/C12H7N3O/c16-12-8-2-1-5-15(12)6-9-11(14-9)10-7(8)3-4-13-10/h1-6,13H/b9-6+                      |
| <b>x4-16</b> | <br><chem>C12H9N3O</chem> | 34.7057 | 279.4893 | -2.4058  | 195.3734 | 519.4702 | InChI=1S/C12H7N3O/c16-12-8-3-1-2-7-4-5-13-10(7)9(12)11(8)15-6-14-15/h1-6,13H/b2-1-,3-1-,7-2-,8-3-,10-9+ |

|               |                                                                                     |         |          |          |          |          |                                                                                                                    |
|---------------|-------------------------------------------------------------------------------------|---------|----------|----------|----------|----------|--------------------------------------------------------------------------------------------------------------------|
| <b>H-112</b>  | 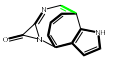   | 10.7647 | 336.0059 | -5.4077  | 140.1532 | 519.9452 | InChI=1S/C12H7N3O/c16-12-11-14-6-7-2-1-3-9(15(11)12)8-4-5-13-10(7)8/h1-6,13H/b7-9?,14-11-                          |
| <b>n-48</b>   |    | 33.9968 | 481.4187 | -14.0268 | 14.1138  | 519.964  | InChI=1S/C12H7N3O/c16-12-9-10-8(3-4-13-10)15(11(9)12)5-1-2-7-6-14-7/h1-6,13H/b5-1-,7-2-                            |
| <b>A1-23</b>  |    | 31.5605 | 402.3908 | -18.4958 | 66.3832  | 520.0129 | InChI=1S/C12H7N3O/c16-12-11-10(15(11)12)8-2-1-4-13-6-9-7(8)3-5-14-9/h1-6,14H/b2-1+,4-1-,8-2-,8-7+,9-6-,13-4-,13-6+ |
| <b>n-170</b>  |    | 60.464  | 209.6654 | -15.6087 | 176.7022 | 520.2091 | InChI=1S/C12H7N3O/c16-12-7-2-1-5-15-9-3-4-13-8(9)6-14-10(7)11(12)15/h1-6,13H                                       |
| <b>B-6</b>    |    | 56.7353 | 335.7516 | -19.2223 | 121.9497 | 520.2093 | InChI=1S/C12H7N3O/c16-10-6-9(10)11-7(3-4-13-11)8-2-1-5-15-12(8)14-15/h1-6,13H                                      |
| <b>H-2</b>    |    | 59.78   | 337.2705 | -22.8093 | 115.4289 | 520.6033 | InChI=1S/C12H7N3O/c16-10-6-7(10)2-1-3-9-8-4-5-13-11(8)12-14-15(9)12/h1-6,13H/b2-1-,9-3-                            |
| <b>x4-28</b>  |    | 42.0517 | 430.0337 | -3.6306  | 26.2637  | 520.7946 | InChI=1S/C12H7N3O/c16-12-8-3-1-2-7-4-5-13-10(7)9(8)11(12)15-6-14-15/h1-6,13H                                       |
| <b>I-68</b>   |    | 24.167  | 227.172  | -7.7117  | 204.3085 | 520.902  | InChI=1S/C12H7N3O/c16-9-6-8-10-11-7(2-4-14-11)15(8)5-1-3-13-12(9)10/h1-6,14H/b5-1-,13-3-                           |
| <b>q11-3</b>  |   | 40.534  | 470.4479 | -19.0189 | 14.1099  | 521.1795 | InChI=1S/C12H7N3O/c16-10-6-8(10)9-3-1-2-7-4-5-13-11(7)12-14-15(9)12/h1-6,13H/b2-1-,9-3-                            |
| <b>G1-39</b>  |  | 7.6569  | 380.1387 | -3.6516  | 114.9553 | 522.74   | InChI=1S/C12H7N3O/c16-9-3-1-2-8-7-4-5-13-11(7)10(9)12(8)15-6-14-15/h1-6,13H                                        |
| <b>o-105</b>  |  | 12.382  | 474.8578 | -7.5714  | 25.4591  | 522.8668 | InChI=1S/C12H7N3O/c16-12-11(14-12)10-8(3-4-13-10)15-5-1-2-7-6-9(7)15/h1-6,13H                                      |
| <b>A-116</b>  |  | 7.5023  | 357.8306 | -4.3312  | 145.4798 | 523.2895 | InChI=1S/C12H7N3O/c16-12-11-8-6-14-9(2-1-5-15(11)12)7-3-4-13-10(7)8/h1-6,13H/b5-1-,9-2-,11-8+                      |
| <b>F-58</b>   |  | 14.4809 | 368.1225 | -8.5212  | 123.0395 | 524.4219 | InChI=1S/C12H7N3O/c16-12-9-3-1-2-7-6-10(15(9)12)14-11-8(7)4-5-13-11/h1-6H,(H,13,14)/b2-1-,9-3-                     |
| <b>x5-38</b>  |  | 20.5419 | 358.1564 | -9.9801  | 131.5015 | 525.2484 | InChI=1S/C12H7N3O/c16-12-10-9-6-8(15(10)12)3-1-2-7-4-5-13-11(7)14-9/h1-6H,(H,13,14)/b3-1-,7-2-                     |
| <b>H11-27</b> |  | 34.3787 | 417.4561 | -20.222  | 82.4347  | 526.6918 | InChI=1S/C12H7N3O/c16-12-10-6-7(14-15(10)12)2-1-3-8-9-4-5-13-11(8)9/h1-6,13H/b2-1-,8-3-                            |
| <b>o-245</b>  |  | 23.8471 | 243.6354 | -9.2964  | 199.7692 | 526.8428 | InChI=1S/C12H7N3O/c16-10-6-9-12(14-10)7-2-1-5-15(9)8-3-4-13-11(7)8/h1-6,13H                                        |
| <b>x4-13</b>  |  | 56.7995 | 407.2539 | -13.8339 | 53.8484  | 528.177  | InChI=1S/C12H7N3O/c16-12-9-8(15-6-14-15)3-1-2-7-4-5-13-11(7)10(9)12/h1-6,13H/b2-1-,3-1-,7-2?,8-3+,9-8-,11-10-      |
| <b>E-19</b>   |  | 22.5443 | 252.6839 | -2.945   | 158.5938 | 528.2917 | InChI=1S/C12H7N3O/c16-12-9-6-7-2-1-3-10(14-15(7)12)8-4-5-13-11(8)9/h1-6,13H                                        |
| <b>x9-32</b>  |  | 49.3841 | 442.7775 | -20.0128 | 33.2467  | 529.217  | InChI=1S/C12H7N3O/c16-12-10-7(4-5-13-10)2-1-3-9-11(15(9)12)8-6-14-8/h1-6,13H/b2-1-,9-3-,11-8-                      |

|                |                                                                                     |         |          |          |          |          |                                                                                                                 |
|----------------|-------------------------------------------------------------------------------------|---------|----------|----------|----------|----------|-----------------------------------------------------------------------------------------------------------------|
| <b>A-161</b>   | 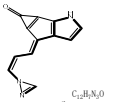   | 64.5008 | 422.1344 | -12.8372 | 50.0416  | 529.5293 | InChI=1S/C12H7N3O/c16-12-9-7(2-1-5-15-6-14-15)8-3-4-13-11(8)10(9)12/h1-6,13H/b5-1-,7-2-                         |
| <b>A-164</b>   |    | 64.4956 | 422.1389 | -12.8387 | 50.0417  | 529.5293 | InChI=1S/C12H7N3O/c16-12-9-7(2-1-5-15-6-14-15)8-3-4-13-11(8)10(9)12/h1-6,13H/b5-1-,7-2-                         |
| <b>s11-15</b>  |    | 27.8887 | 218.0288 | -3.4304  | 186.8062 | 530.7711 | InChI=1S/C12H7N3O/c16-12-9-6-8-3-1-2-7-4-5-13-10(7)11(12)15(9)14-8/h1-6,13H/b3-1-,7-2-,11-10+                   |
| <b>x3-18</b>   |    | 17.1198 | 237.5195 | -6.6959  | 252.472  | 530.8629 | InChI=1S/C12H7N3O/c16-12-7-6-15-5-1-3-13-11(9(7)12)10-8(15)2-4-14-10/h1-6,14H/b5-1-,13-3-                       |
| <b>o-88</b>    |    | 74.5028 | 174.0144 | -0.8599  | 173.7279 | 531.1528 | InChI=1S/C12H7N3O/c16-12-10-7-2-1-5-15(12)9-3-4-13-11(9)8(6-7)14-10/h1-6,13H                                    |
| <b>X22-61</b>  |    | 15.0096 | 504.5486 | -5.7686  | 6.5529   | 531.4198 | InChI=1S/C12H7N3O/c16-12-7-2-1-4-13-8-3-5-14-10(8)9-6-15(9)11(7)12/h1-6,14H/b2-1-,13-4+                         |
| <b>o-169</b>   |    | 85.2448 | 407.7816 | -50.4001 | 59.1498  | 531.5637 | InChI=1S/C12H7N3O/c16-10-6-7(10)11-8(14-11)2-1-5-15-9-3-4-13-12(9)15/h1-6,13H/b5-1-,8-2+                        |
| <b>q-31</b>    |    | 39.5672 | 431.4769 | -23.3095 | 69.0953  | 532.4619 | InChI=1S/C12H7N3O/c16-10-6-8(10)11-7(4-5-13-11)2-1-3-9-12-14-15(9)12/h1-6,13H/b2-1-,9-3-                        |
| <b>i-1</b>     |   | 55.7208 | 336.1653 | -27.4489 | 115.9848 | 533.5404 | InChI=1S/C12H7N3O/c16-10-6-9(10)15-8-2-1-4-13-7-3-5-14-11(7)12(8)15/h1-6,14H/b2-1-,4-1-,8-2+,12-11-,13-4-,13-7- |
| <b>B-25</b>    |  | 14.0538 | 283.2203 | -1.0748  | 210.5397 | 533.8624 | InChI=1S/C12H7N3O/c16-10-6-9-12(14-9)15-5-1-2-7(10)8-3-4-13-11(8)15/h1-6,13H/b9-6+                              |
| <b>o-43</b>    |  | 29.1812 | 362.5097 | -21.6032 | 134.2685 | 534.3421 | InChI=1S/C12H7N3O/c16-11-8-6-7(14-10(8)11)2-1-5-15-9-3-4-13-12(9)15/h1-6,13H/b5-1-,7-2+                         |
| <b>H11-52</b>  |  | 35.4676 | 314.0187 | -9.3026  | 121.1356 | 535.6238 | InChI=1S/C12H7N3O/c16-12-8-6-15(12)11-7(4-5-13-11)9-2-1-3-10(8)14-9/h1-6,13H                                    |
| <b>o-142</b>   |  | 13.9255 | 266.7158 | -5.9232  | 212.1313 | 536.8329 | InChI=1S/C12H7N3O/c16-11-7-2-1-5-15(12-8(6-7)14-12)9-3-4-13-10(9)11/h1-6,13H/b5-1-,7-2-,8-6+                    |
| <b>H-120</b>   |  | 19.0317 | 379.7294 | -10.7438 | 106.8113 | 537.0635 | InChI=1S/C12H7N3O/c16-12-11-14-10-9(4-5-13-10)7-2-1-3-8(6-7)15(11)12/h1-6,13H/b14-11-                           |
| <b>B-56</b>    |  | 68.3263 | 106.8393 | -6.4000  | 241.3061 | 537.4364 | InChI=1S/C12H7N3O/c16-9-6-10-14-12-11-8(3-4-13-11)7(9)2-1-5-15(10)12/h1-6,13H/b5-1-,7-2+,10-6-                  |
| <b>H11-157</b> |  | 6.2378  | 358.4387 | -3.436   | 152.0061 | 537.6199 | InChI=1S/C12H7N3O/c16-10-6-9-12-8(4-5-13-12)7(10)2-1-3-11-14-15(9)11/h1-6,13H/b3-1-,7-2+                        |
| <b>o-92</b>    |  | 6.1719  | 420.607  | -4.4464  | 95.1141  | 537.8444 | InChI=1S/C12H7N3O/c16-12-11-8(14-11)6-7-2-1-5-15(12)9-3-4-13-10(7)9/h1-6,13H/b8-6-                              |
| <b>A1-38</b>   |  | 33.4126 | 330.8115 | -13.968  | 152.4089 | 538.5182 | InChI=1S/C12H7N3O/c16-11-9-7-2-1-4-13-6-15(10(9)11)12-8(7)3-5-14-12/h1-6,14H/b4-1-,7-2-,13-6-                   |
| <b>H-142</b>   |  | 11.7763 | 376.0464 | -4.6876  | 121.8824 | 539.0595 | InChI=1S/C12H7N3O/c16-12-11(14-12)15-8-3-1-2-7(6-8)9-4-5-13-10(9)15/h1-6,13H                                    |

|                |                                                                                     |         |          |          |          |          |                                                                                                                    |
|----------------|-------------------------------------------------------------------------------------|---------|----------|----------|----------|----------|--------------------------------------------------------------------------------------------------------------------|
| <b>q11-22</b>  | 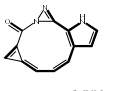   | 25.5728 | 443.8257 | -8.0346  | 57.4771  | 539.152  | InChI=1S/C12H7N3O/c16-12-9-6-8(9)3-1-2-7-4-5-13-10(7)11-14-15(11)12/h1-6,13H/b2-1-,8-3-                            |
| <b>X22-37</b>  |    | 49.0223 | 385.9611 | -22.7423 | 84.8135  | 539.7301 | InChI=1S/C12H7N3O/c16-10-6-9(10)15-8-2-1-4-13-7-3-5-14-11(7)12(8)15/h1-6,14H/b2-1-,4-1-,8-2-,12-11-,13-4-,13-7+    |
| <b>o-153</b>   |    | 11.8654 | 286.9106 | -4.4862  | 202.8484 | 539.9066 | InChI=1S/C12H7N3O/c16-10-6-8-12(14-8)15-5-1-2-7(10)11-9(15)3-4-13-11/h1-6,13H/b8-6+                                |
| <b>o-8</b>     |    | 5.9099  | 313.5441 | -2.8623  | 192.6171 | 540.2982 | InChI=1S/C12H7N3O/c16-12-7-2-1-5-15(6-8-11(12)14-8)9-3-4-13-10(7)9/h1-6,13H/b8-6+                                  |
| <b>B-246</b>   |    | 20.4189 | 277.7493 | -7.3434  | 212.1976 | 543.0819 | InChI=1S/C12H7N3O/c16-12-11-8(3-4-13-11)7-2-1-5-15(12)6-9-10(7)14-9/h1-6,13H/b5-1-,7-2+,9-6+                       |
| <b>H11-4</b>   |    | 42.272  | 449.3267 | -27.8614 | 49.5383  | 544.3496 | InChI=1S/C12H7N3O/c16-12-14-9(10-6-15(10)12)3-1-2-7-8-4-5-13-11(7)8/h1-6,13H/b3-1-,7-2-                            |
| <b>q11-42</b>  |    | 21.6786 | 461.2642 | -18.89   | 67.5798  | 544.5193 | InChI=1S/C12H7N3O/c16-12-11(14-12)10-7(4-5-13-10)2-1-3-8-9-6-15(8)9/h1-6,13H/b2-1-,8-3-                            |
| <b>H-17</b>    |    | 27.5576 | 284.4669 | -9.3889  | 181.4634 | 545.1328 | InChI=1S/C12H7N3O/c16-12-7-2-1-3-9(11-14-15(11)12)8-4-5-13-10(8)6-7/h1-6,13H/b2-1-,3-1+,7-2-,7-6+,9-3+,9-8+,10-6+  |
| <b>H11-24</b>  |   | 35.4996 | 184.506  | 0.2029   | 215.4248 | 546.5195 | InChI=1S/C12H7N3O/c16-12-8-2-1-3-10-7-4-5-13-11(7)9(14-8)6-15(10)12/h1-6,13H                                       |
| <b>n-167</b>   |  | 21.7644 | 312.0941 | -8.1315  | 183.8997 | 546.5702 | InChI=1S/C12H7N3O/c16-12-7-2-1-5-15-6-14-11(9(7)12)10-8(15)3-4-13-10/h1-6,13H/b5-1-,7-2+,11-9+                     |
| <b>x5-41</b>   |  | 36.1623 | 408.9338 | -22.5447 | 82.6439  | 546.6424 | InChI=1S/C12H7N3O/c16-12-10-9(15(10)12)8-3-1-2-7-4-5-13-11(7)14-6-8/h1-6H,11,13,14                                 |
| <b>B-250</b>   |  | 55.8257 | 427.8550 | -32.4853 | 58.7815  | 546.7424 | InChI=1S/C12H7N3O/c16-12-11(14-12)9-6-15(9)5-1-2-7-8-3-4-13-10(7)8/h1-6,13H/b5-1-,7-2-                             |
| <b>B-7</b>     |  | 53.1996 | 384.3254 | -24.9124 | 100.6858 | 547.7187 | InChI=1S/C12H7N3O/c16-10-6-9(10)7-2-1-5-15-12(14-15)11-8(7)3-4-13-11/h1-6,13H/b5-1-,7-2+                           |
| <b>H-46</b>    |  | 29.6639 | 423.367  | -18.102  | 100.504  | 547.8796 | InChI=1S/C12H7N3O/c16-10-6-7(12-14-15(10)12)2-1-3-8-9-4-5-13-11(8)9/h1-6,13H/b2-1-,8-3-                            |
| <b>H-1</b>     |  | 28.2799 | 432.948  | -7.1062  | 89.735   | 548.8865 | InChI=1S/C12H7N3O/c16-10-6-7(10)2-1-3-8-9-4-5-13-11(9)15-12(8)14-15/h1-6,13H/b2-1-,8-3-                            |
| <b>B-205</b>   |  | 28.3325 | 416.2083 | -14.2854 | 101.2601 | 549.5034 | InChI=1S/C12H7N3O/c16-12-9-6-15(14-11(9)12)5-1-2-7-8-3-4-13-10(7)8/h1-6,13H/b5-1-,7-2-                             |
| <b>H11-131</b> |  | 63.209  | 328.2761 | -21.4668 | 153.2239 | 550.2088 | InChI=1S/C12H7N3O/c16-10-6-8(10)12-7(4-5-13-12)9-2-1-3-11-14-15(9)11/h1-6,13H                                      |
| <b>H-63</b>    |  | 7.6693  | 312.2742 | -3.6849  | 200.6819 | 551.8636 | InChI=1S/C12H7N3O/c16-11-9-3-1-2-7(15-12(11)14-15)6-10-8(9)4-5-13-10/h1-6,13H/b2-1-,3-1-,7-2+,7-6-,9-3+,9-8+,10-6- |
| <b>H-140</b>   |  | 8.8495  | 381.2359 | -4.4102  | 132.551  | 552.0011 | InChI=1S/C12H7N3O/c16-12-11(14-12)15-6-7-2-1-3-9(15)8-4-5-13-10(7)8/h1-6,13H                                       |

|                |                                                                                     |           |           |           |           |           |                                                                                                                    |
|----------------|-------------------------------------------------------------------------------------|-----------|-----------|-----------|-----------|-----------|--------------------------------------------------------------------------------------------------------------------|
| <b>J-19</b>    |    | 33, 8998  | 405, 9618 | -20, 0515 | 90, 9701  | 553, 6468 | InChI=1S/C12H7N3O/c16-12-11-10(15(11)12)7-2-1-4-13-8-3-5-14-9(8)6-7/h1-6,14H/b2-1-,4-1-,7-2-,7-6+,9-6+,13-4-,13-8- |
|                | $C_{12}H_7N_3O$                                                                     |           |           |           |           |           |                                                                                                                    |
| <b>B-9</b>     |    | 47, 0158  | 313, 7818 | -20, 3052 | 177, 3003 | 553, 7674 | InChI=1S/C12H7N3O/c16-10-6-9(10)14-12-7-2-1-5-15(12)11-8(7)3-4-13-11/h1-6,13H/b4-12-                               |
|                | $C_{12}H_7N_3O$                                                                     |           |           |           |           |           |                                                                                                                    |
| <b>H-145</b>   |    | 61, 9606  | 436, 9493 | -39, 0581 | 62, 4658  | 554, 1098 | InChI=1S/C12H7N3O/c16-12-11(14-12)15-6-7(15)2-1-3-8-9-4-5-13-10(8)9/h1-6,13H/b2-1-,8-3-                            |
|                | $C_{12}H_7N_3O$                                                                     |           |           |           |           |           |                                                                                                                    |
| <b>H1-18</b>   |    | 23, 0563  | 255, 0699 | -3, 52    | 234, 5017 | 554, 4645 | InChI=1S/C12H7N3O/c16-10-3-1-2-8-7-4-5-13-11(7)9(10)6-15-12(8)14-15/h1-6,13H/b3-1-,8-2+                            |
|                | $C_{12}H_7N_3O$                                                                     |           |           |           |           |           |                                                                                                                    |
| <b>H11-129</b> |    | 92, 9968  | 423, 2239 | -41, 5388 | 67, 8374  | 556, 566  | InChI=1S/C12H7N3O/c16-10-6-9(10)15-11(14-15)3-1-2-7-8-4-5-13-12(7)8/h1-6,13H/b3-1-,7-2-                            |
|                | $C_{12}H_7N_3O$                                                                     |           |           |           |           |           |                                                                                                                    |
| <b>o-41</b>    |    | 7, 6221   | 327, 8079 | -2, 2259  | 197, 8619 | 562, 4258 | InChI=1S/C12H7N3O/c16-12-7-6-15-5-1-2-8(10)7(12)11-9(15)3-4-13-11/h1-6,13H/b7-6+,14-10+                            |
|                | $C_{12}H_7N_3O$                                                                     |           |           |           |           |           |                                                                                                                    |
| <b>q1-59</b>   |    | 35, 2977  | 250, 999  | -7, 1099  | 184, 1047 | 562, 4889 | InChI=1S/C12H7N3O/c16-11-10-7(4-5-13-10)2-1-3-8-9-6-14-12(11)15(8)9/h1-6,13H/b2-1-,8-3-                            |
|                | $C_{12}H_7N_3O$                                                                     |           |           |           |           |           |                                                                                                                    |
| <b>q1-60</b>   |    | 35, 2955  | 251, 0004 | -7, 1093  | 184, 1049 | 562, 4889 | InChI=1S/C12H7N3O/c16-11-10-7(4-5-13-10)2-1-3-8-9-6-15(9)12(11)14-8/h1-6,13H/b2-1-,8-3-                            |
|                | $C_{12}H_7N_3O$                                                                     |           |           |           |           |           |                                                                                                                    |
| <b>q-9</b>     |    | 5, 3794   | 510, 7308 | -4, 4858  | 39, 0562  | 565, 5103 | InChI=1S/C12H7N3O/c16-12-8-3-1-2-7-4-5-13-10(7)9-6-15(9)14-11(8)12/h1-6,13H/b2-1-,8-3-,14-11+                      |
|                | $C_{12}H_7N_3O$                                                                     |           |           |           |           |           |                                                                                                                    |
| <b>x4-65</b>   |   | 118, 5101 | 117, 6217 | 0, 7239   | 121, 6109 | 567, 3897 | InChI=1S/C12H7N3O/c16-12-14-6-8-9-3-1-2-7-4-5-13-10(7)11(8)15(9)12/h1-6,13H/b2-1-,3-1-,7-2-,9-3-,11-10+            |
|                | $C_{12}H_7N_3O$                                                                     |           |           |           |           |           |                                                                                                                    |
| <b>H11-153</b> |  | 14, 8429  | 212, 3338 | -5, 0959  | 286, 9912 | 567, 9757 | InChI=1S/C12H7N3O/c16-11-7-2-1-3-10-14-9(11)6-15(10)12-8(7)4-5-13-12/h1-6,13H/b3-1-,7-2-                           |
|                | $C_{12}H_7N_3O$                                                                     |           |           |           |           |           |                                                                                                                    |
| <b>H11-138</b> |  | 31, 0733  | 314, 8555 | -2, 351   | 180, 7329 | 569, 5849 | InChI=1S/C12H7N3O/c16-12-9-6-7(8-4-5-13-11(8)12)2-1-3-10-14-15(9)10/h1-6,13H/b3-1-,7-2+                            |
|                | $C_{12}H_7N_3O$                                                                     |           |           |           |           |           |                                                                                                                    |
| <b>B-100</b>   |  | 25, 3840  | 366, 0297 | -12, 3389 | 120, 5242 | 570, 2147 | InChI=1S/C12H7N3O/c16-12-11-7(3-4-13-11)8-2-1-5-15(12)10-6-9(10)14-8/h1-6,13H/b5-1-,8-2-,14-9-                     |
|                | $C_{12}H_7N_3O$                                                                     |           |           |           |           |           |                                                                                                                    |
| <b>H-79</b>    |  | 27, 2404  | 204, 4452 | -0, 9662  | 255, 4377 | 574, 6805 | InChI=1S/C12H7N3O/c16-12-9-3-1-2-7-6-15(12)11(14-7)10-8(9)4-5-13-10/h1-6,13H/b2-1-,9-3-                            |
|                | $C_{12}H_7N_3O$                                                                     |           |           |           |           |           |                                                                                                                    |
| <b>o-195</b>   |  | 57, 2798  | 363, 0401 | -24, 4922 | 148, 6    | 575, 2101 | InChI=1S/C12H7N3O/c16-10-6-7(10)11-9(3-4-13-11)15-5-1-2-8-12(14-8)/h1-6,13H                                        |
|                | $C_{12}H_7N_3O$                                                                     |           |           |           |           |           |                                                                                                                    |
| <b>H-146</b>   |  | 37, 6185  | 391, 4367 | -18, 3924 | 119, 1527 | 576, 3995 | InChI=1S/C12H7N3O/c16-12-10(14-12)8-3-1-2-7-6-15(7)11-9(8)4-5-13-11/h1-6,13H/b2-1-,8-3+                            |
|                | $C_{12}H_7N_3O$                                                                     |           |           |           |           |           |                                                                                                                    |
| <b>o-84</b>    |  | 35, 6083  | 234, 1044 | -7, 3865  | 229, 8095 | 578, 4437 | InChI=1S/C12H7N3O/c16-10-6-8-7-2-1-5-15(12(10)14-8)9-3-4-13-11(7)9/h1-6,13H                                        |
|                | $C_{12}H_7N_3O$                                                                     |           |           |           |           |           |                                                                                                                    |
| <b>q1-52</b>   |  | 52, 0835  | 230, 2145 | -9, 4445  | 203, 4246 | 578, 555  | InChI=1S/C12H7N3O/c16-11-9-6-14-12-8(15(9)12)3-1-2-7-4-5-13-10(7)11/h1-6,13H/b2-1-,8-3-                            |
|                | $C_{12}H_7N_3O$                                                                     |           |           |           |           |           |                                                                                                                    |
| <b>B-166</b>   |  | 8, 3668   | 361, 1655 | -5, 0258  | 180, 9595 | 579, 4220 | InChI=1S/C12H7N3O/c16-12-10(14-12)9-6-7-2-1-5-15(9)11-8(7)3-4-13-11/h1-6,13H                                       |
|                | $C_{12}H_7N_3O$                                                                     |           |           |           |           |           |                                                                                                                    |



|                |                                                                                     |          |          |          |          |          |                                                                                                                           |
|----------------|-------------------------------------------------------------------------------------|----------|----------|----------|----------|----------|---------------------------------------------------------------------------------------------------------------------------|
| <b>o-103</b>   |    | 9.2134   | 389.6344 | -4.4371  | 151.8766 | 580.9726 | InChI=1S/C12H7N3O/c16-12-11(14-12)9-6-7-2-1-5-15(9)8-3-4-13-10(7)8/h1-6,13H                                               |
|                | $C_{12}H_7N_3O$                                                                     |          |          |          |          |          |                                                                                                                           |
| <b>o-100</b>   |    | 9.2659   | 389.4437 | -4.4386  | 152.8028 | 581.6421 | InChI=1S/C12H7N3O/c16-12-11(14-12)8-6-15-5-1-2-7(8)10-9(15)3-4-13-10/h1-6,13H                                             |
|                | $C_{12}H_7N_3O$                                                                     |          |          |          |          |          |                                                                                                                           |
| <b>H11-135</b> |    | 56.9281  | 338.4564 | -21.3536 | 151.2871 | 581.8178 | InChI=1S/C12H7N3O/c16-10-6-9(10)15-11-3-1-2-8(14-11)7-4-5-13-12(7)15/h1-6,13H                                             |
|                | $C_{12}H_7N_3O$                                                                     |          |          |          |          |          |                                                                                                                           |
| <b>G-28</b>    |    | 7.2136   | 559.1289 | -6.823   | 19.4606  | 582.526  | InChI=1S/C12H7N3O/c16-12-10-3-1-2-7(9-6-14-9)8-4-5-13-11(8)15(10)12/h1-6,13H/b2-1-,9-7-,10-3-                             |
|                | $C_{12}H_7N_3O$                                                                     |          |          |          |          |          |                                                                                                                           |
| <b>o-33</b>    |    | 29.128   | 205.1976 | -1.6662  | 258.6443 | 582.7638 | InChI=1S/C12H7N3O/c16-12-8-6-7-2-1-5-15(14-10(7)12)9-3-4-13-11(8)9/h1-6,13H                                               |
|                | $C_{12}H_7N_3O$                                                                     |          |          |          |          |          |                                                                                                                           |
| <b>o-194</b>   |    | 47.5457  | 318.1315 | -20.0676 | 201.4043 | 584.923  | InChI=1S/C12H7N3O/c16-10-6-8(10)14-12-7-2-1-5-15(12)9-3-4-13-11(7)9/h1-6,13H/b14-12+                                      |
|                | $C_{12}H_7N_3O$                                                                     |          |          |          |          |          |                                                                                                                           |
| <b>G-1</b>     |    | 4.8466   | 585.3746 | -4.055   | -8.8242  | 584.9703 | InChI=1S/C12H7N3O/c16-11-9-3-1-2-7(10(9)11)8-4-5-13-12(8)15-6-14-15/h1-6,13H                                              |
|                | $C_{12}H_7N_3O$                                                                     |          |          |          |          |          |                                                                                                                           |
| <b>X-29</b>    |    | 46.7691  | 357.4902 | -13.7856 | 109.0789 | 586.5769 | InChI=1S/C12H7N3O/c16-11-9-8(3-5-13-9)7-2-1-4-14-12-10(11)15(12)6-7/h1-6,13H/b2-1-,14-4-                                  |
|                | $C_{12}H_7N_3O$                                                                     |          |          |          |          |          |                                                                                                                           |
| <b>H-134</b>   |    | 8.2966   | 351.9734 | -4.8319  | 197.0684 | 589.1494 | InChI=1S/C12H7N3O/c16-12-11-14-7-2-1-3-10(15(11)12)8-4-5-13-9(8)6-7/h1-6,13H/b2-1-,3-1-,7-2-,7-6-,9-6-,10-3-,10-8-,14-11+ |
|                | $C_{12}H_7N_3O$                                                                     |          |          |          |          |          |                                                                                                                           |
| <b>q11-30</b>  |   | 23.6355  | 453.4107 | -5.9429  | 102.6509 | 589.34   | InChI=1S/C12H7N3O/c16-11-8-3-1-2-7-4-5-13-10(7)12-14-15(12)6-9(8)11/h1-6,13H/b2-1-,8-3+,9-6+                              |
|                | $C_{12}H_7N_3O$                                                                     |          |          |          |          |          |                                                                                                                           |
| <b>s11-24</b>  |  | 25.8052  | 474.9788 | -9.4184  | 72.1017  | 592.0316 | InChI=1S/C12H7N3O/c16-9-6-8(9)12-11-7(4-5-13-11)2-1-3-10-14-15(10)12/h1-6,13H/b3-1-,7-2-,12-11+                           |
|                | $C_{12}H_7N_3O$                                                                     |          |          |          |          |          |                                                                                                                           |
| <b>B-158</b>   |  | 112.3698 | 138.3066 | -6.2273  | 214.5581 | 593.3360 | InChI=1S/C12H7N3O/c16-12-9-6-7-2-1-5-15(9)14-11(12)10-8(7)3-4-13-10/h1-6,13H                                              |
|                | $C_{12}H_7N_3O$                                                                     |          |          |          |          |          |                                                                                                                           |
| <b>q11-24</b>  |  | 119.0408 | 164.2401 | -16.2932 | 174.6628 | 594.1339 | InChI=1S/C12H7N3O/c16-12-8-6-15-9(12)3-1-2-7-4-5-13-10(7)11(8)14-15/h1-6,13H/b2-1-,9-3-                                   |
|                | $C_{12}H_7N_3O$                                                                     |          |          |          |          |          |                                                                                                                           |
| <b>X23-5</b>   |  | 17.3383  | 395.5576 | -8.105   | 151.0733 | 594.5359 | InChI=1S/C12H7N3O/c16-12-11-8-6-7(15(11)12)2-1-4-13-9-3-5-14-10(8)9/h1-6,14H/b2-1-,13-4-                                  |
|                | $C_{12}H_7N_3O$                                                                     |          |          |          |          |          |                                                                                                                           |
| <b>A-48</b>    |  | 110.8024 | 191.1679 | -11.5963 | 141.2124 | 595.2185 | InChI=1S/C12H7N3O/c16-12-8-6-14-9-2-1-5-15(12)11(8)10-7(9)3-4-13-10/h1-6,13H/b5-1-,9-2?                                   |
|                | $C_{12}H_7N_3O$                                                                     |          |          |          |          |          |                                                                                                                           |
| <b>x4-39</b>   |  | 28.4676  | 567.4099 | -18.9209 | 11.6416  | 596.5025 | InChI=1S/C12H7N3O/c16-12-11-10(15(11)12)9-7(4-5-13-9)2-1-3-8-6-14-8/h1-6,13H/b2-1-,8-3-                                   |
|                | $C_{12}H_7N_3O$                                                                     |          |          |          |          |          |                                                                                                                           |
| <b>E-58</b>    |  | 56.366   | 304.5087 | -1.6749  | 151.5082 | 596.8912 | InChI=1S/C12H7N3O/c16-12-7-2-1-3-9-8-4-5-13-11(8)10(6-7)15(12)14-9/h1-6,13H/b3-1-,7-2-                                    |
|                | $C_{12}H_7N_3O$                                                                     |          |          |          |          |          |                                                                                                                           |
| <b>F-5</b>     |  | 116.5159 | 182.4432 | -7.0139  | 169.0299 | 597.4067 | InChI=1S/C12H7N3O/c16-11-9-6-15-10(11)3-1-2-7(9)8-4-5-13-12(8)14-15/h1-6H,13,14                                           |
|                | $C_{12}H_7N_3O$                                                                     |          |          |          |          |          |                                                                                                                           |
| <b>s11-26</b>  |  | 41.1956  | 221.3895 | -3.2479  | 221.1417 | 597.7032 | InChI=1S/C12H7N3O/c16-12-8-3-1-2-7-4-5-13-11(7)9-6-10(12)15(9)14-8/h1-6,13H/b3-1-,7-2-,11-9+                              |
|                | $C_{12}H_7N_3O$                                                                     |          |          |          |          |          |                                                                                                                           |

|               |                                                                                     |           |           |           |           |           |                                                                                                              |
|---------------|-------------------------------------------------------------------------------------|-----------|-----------|-----------|-----------|-----------|--------------------------------------------------------------------------------------------------------------|
| <b>s11-19</b> |    | 32, 5894  | 520, 617  | -1, 6299  | 32, 073   | 599, 5328 | InChI=1S/C12H7N3O/c16-12-8-6-15-9(14-15)3-1-2-7-4-5-13-11(7)10(8)12/h1-6, 13H/b3-1-, 7-2-, 8-6+, 11-10-      |
| <b>B-159</b>  |    | 106, 2673 | 168, 7315 | -6, 9524  | 173, 8143 | 599, 8938 | InChI=1S/C12H7N3O/c16-10-9-6-7-2-1-5-15(9)12(10)14-11-8(7)3-4-13-11/h1-6, 13H/b14-12-                        |
| <b>A-174</b>  |    | 110, 4153 | 188, 1457 | -10, 6784 | 140, 6899 | 600, 1554 | InChI=1S/C12H7N3O/c16-12-10-11-9-8(3-4-13-9)7(6-14-10)2-1-5-15(11)12/h1-6, 13H/b5-1-, 7-2+                   |
| <b>s12-1</b>  |    | 59, 2945  | 444, 2272 | -34, 8579 | 86, 1374  | 600, 5944 | InChI=1S/C12H7N3O/c16-12-11-10-8(14-10)3-1-2-7-4-5-13-9(7)6-15(11)12/h1-6, 13H/b3-1-, 7-2-, 9-6-, 11-10+     |
| <b>p-25</b>   |    | 31, 3362  | 535, 9802 | -2, 3182  | 31, 4898  | 603, 5707 | InChI=1S/C12H7N3O/c16-12-10-3-1-2-7-4-5-13-8(7)6-9-11(14-9)15(10)12/h1-6, 13H/b2-1-, 9-6+, 10-3-             |
| <b>B-3</b>    |    | 80, 2990  | 484, 5911 | -39, 7794 | 56, 9957  | 604, 8136 | InChI=1S/C12H7N3O/c16-10-6-9(10)12-14-15(12)5-1-2-7-8-3-4-13-11(7)8/h1-6, 13H/b5-1-, 7-2-                    |
| <b>s11-41</b> |    | 32, 8314  | 494, 664  | -5, 1573  | 77, 7814  | 605, 1568 | InChI=1S/C12H7N3O/c16-12-11-10-7(4-5-13-10)2-1-3-8-9(14-8)6-15(11)12/h1-6, 13H/b3-1-, 7-2-, 9-6-, 11-10+     |
| <b>s12-38</b> |    | 63, 5595  | 452, 6179 | -37, 5274 | 77, 6939  | 605, 233  | InChI=1S/C12H7N3O/c16-12-11-10-8(14-10)3-1-2-7-4-5-13-9(7)6-15(11)12/h1-6, 13H/b3-1-, 7-2-, 9-6-, 11-10-     |
| <b>x3-16</b>  |   | 81, 1163  | 131, 415  | -6, 0587  | 252, 8722 | 606, 6167 | InChI=1S/C12H7N3O/c16-12-7-6-15-5-1-3-13-10(7)9(12)11-8(15)2-4-14-11/h1-6, 14H/b5-1-, 13-3+                  |
| <b>o-137</b>  |  | 10, 4623  | 280, 5907 | -5, 6046  | 266, 679  | 607, 4944 | InChI=1S/C12H7N3O/c16-12-7-2-1-5-15(10-6-8(7)14-10)9-3-4-13-11(9)12/h1-6, 13H/b5-1-, 7-2-, 8-6+              |
| <b>o-138</b>  |  | 10, 4623  | 280, 5907 | -5, 6046  | 266, 679  | 607, 4944 | InChI=1S/C12H7N3O/c16-12-7-2-1-5-15(10-6-8(7)14-10)9-3-4-13-11(9)12/h1-6, 13H/b5-1-, 7-2+                    |
| <b>H-81</b>   |  | 83, 8146  | 132, 7448 | -2, 0764  | 218, 0375 | 607, 5426 | InChI=1S/C12H7N3O/c16-12-9-3-1-2-7-6-10(14-12)15(7)11-8(9)4-5-13-11/h1-6, 13H/b2-1-, 9-3-                    |
| <b>x4-49</b>  |  | 100, 7238 | 78, 9635  | -1, 278   | 208, 6361 | 609, 2112 | InChI=1S/C12H7N3O/c16-12-9-8-3-1-2-7-4-5-13-10(7)11(9)15(8)6-14-12/h1-6, 13H/b2-1-, 3-1-, 7-2-, 8-3+, 11-10+ |
| <b>o-83</b>   |  | 83, 1147  | 155, 1226 | -2, 4533  | 209, 5822 | 610, 4506 | InChI=1S/C12H7N3O/c16-10-6-9-7-2-1-5-15(9)8-3-4-13-11(8)12(10)14-7/h1-6, 13H                                 |
| <b>q11-57</b> |  | 19, 3409  | 484, 0376 | -7, 1388  | 100, 4018 | 611, 173  | InChI=1S/C12H7N3O/c16-12-9-3-1-2-7-4-5-13-10(7)11-8(14-11)6-15(9)12/h1-6, 13H/b2-1-, 8-6+, 9-3-              |
| <b>o-115</b>  |  | 121, 1788 | 137, 1193 | -12, 1887 | 211, 5004 | 613, 1668 | InChI=1S/C12H7N3O/c16-11-7-2-1-5-15-9-3-4-13-12(9)14-8(7)6-10(11)15/h1-6, 13H                                |
| <b>p-19</b>   |  | 36, 3524  | 542, 6912 | -1, 6868  | 30, 967   | 614, 5603 | InChI=1S/C12H7N3O/c16-12-10-6-9-7(4-5-13-9)2-1-3-8-11(14-8)15(10)12/h1-6, 13H/b2-1-, 8-3+, 10-6-             |
| <b>n-160</b>  |  | 37, 4044  | 527, 7858 | -21, 214  | 47, 597   | 616, 1988 | InChI=1S/C12H7N3O/c16-11-7(10(11)8-6-14-8)2-1-5-15-9-3-4-13-12(9)15/h1-6, 13H/b5-1-, 7-2-, 10-8+             |
| <b>A2-64</b>  |  | 18, 8474  | 458, 7429 | -4, 8857  | 120, 3507 | 617, 7947 | InChI=1S/C12H7N3O/c16-10-6-9(10)15-8-2-1-4-14-12(15)11-7(8)3-5-13-11/h1-6, 13H                               |

|                |                                                                                     |          |          |          |          |          |                                                                                                                |
|----------------|-------------------------------------------------------------------------------------|----------|----------|----------|----------|----------|----------------------------------------------------------------------------------------------------------------|
| <b>n-159</b>   |    | 9.8923   | 373.3664 | -4.988   | 200.8884 | 618.5545 | InChI=1S/C12H7N3O/c16-12-7-2-1-5-15(11)(12)8-6-14-8)9-3-4-13-10(7)9/h1-6,13H/b11-8-                            |
| <b>G-53</b>    |    | 21.7228  | 540.4176 | -14.1698 | 72.5792  | 622.4466 | InChI=1S/C12H7N3O/c16-12-10-8(3-1-2-7-6-14-7)9-4-5-13-11(9)15(10)12/h1-6,13H/b3-1-,7-2-                        |
| <b>x4-55</b>   |    | 35.9644  | 497.5163 | -6.2288  | 88.2876  | 625.1611 | InChI=1S/C12H7N3O/c16-12-9-3-1-2-7-4-5-13-10(7)11(15(9)12)8-6-14-8/h1-6,13H/b2-1-,9-3-,11-8-                   |
| <b>I-28</b>    |    | 20.499   | 413.0557 | -10.8252 | 154.8829 | 626.8357 | InChI=1S/C12H7N3O/c16-11-7-6-8-9(2-4-13-8)15-5-1-3-14-12(15)7(11)/h1-6,13H                                     |
| <b>A2-60</b>   |    | 181.5459 | 141.6323 | -18.4344 | 149.7095 | 629.3483 | InChI=1S/C12H7N3O/c16-11-7-2-1-4-13-10-6-9(11)15(10)12-8(7)3-5-14-12/h1-6,14H/b4-1-,7-2-,13-10-                |
| <b>o-135</b>   |    | 51.3558  | 51.3558  | -1.9351  | 263.1238 | 629.4345 | InChI=1S/C12H7N3O/c16-12-7-6-10-14-8(12)2-1-5-15(10)9-3-4-13-11(7)9/h1-6,13H                                   |
| <b>H1-112</b>  |    | 51.3419  | 285.6661 | -5.2579  | 152.7529 | 631.9066 | InChI=1S/C12H7N3O/c16-11-3-1-2-10-7-4-5-13-9(7)6-8(11)12-14-15(10)12/h1-6,13H/b3-1-,10-2-                      |
| <b>o-178</b>   |    | 7.9808   | 385.6085 | -4.3072  | 200.308  | 632.9609 | InChI=1S/C12H7N3O/c16-12-7-6-15(9-3-4-13-11(9)12)5-1-2-8-10(7)14-8/h1-6,13H/b5-1-,8-2+                         |
| <b>H1-50</b>   |   | 161.1305 | 188.3019 | -16.5316 | 137.0661 | 634.7372 | InChI=1S/C12H7N3O/c16-9-3-1-2-7-6-10-14-12(9)15(10)11-8(7)4-5-13-11/h1-6,13H/b3-1-,7-2+                        |
| <b>B-116</b>   |  | 11.4350  | 446.7503 | -5.1116  | 152.5187 | 636.2027 | InChI=1S/C12H7N3O/c16-12-9(14-12)6-10-7-2-1-5-15(10)11-8(7)3-4-13-11/h1-6,13H/b10-6+                           |
| <b>H-4</b>     |  | 50.8879  | 330.9189 | -14.6343 | 209.4347 | 638.2767 | InChI=1S/C12H7N3O/c16-11-7-2-1-3-9(11)8-4-5-13-10(8)12-14-15(12)6-7/h1-6,13H/b7-6-                             |
| <b>A-76</b>    |  | 46.8207  | 549.5131 | -24.4362 | 53.3533  | 638.8785 | InChI=1S/C12H7N3O/c16-12-11(9-6-14-9)15(12)5-1-2-7-8-3-4-13-10(7)8/h1-6,13H/b5-1-,7-2-,11-9+                   |
| <b>x4-29</b>   |  | 33.8434  | 521.6337 | -2.2975  | 79.9158  | 641.2281 | InChI=1S/C12H7N3O/c16-12-8-3-1-2-7-4-5-13-10(7)11(9(8)12)15-6-14-15/h1-6,13H/b2-1-,3-1-,7-29,8-3+,11-9-,11-10- |
| <b>H11-130</b> |  | 30.7082  | 530.2823 | -3.6247  | 81.121   | 646.3184 | InChI=1S/C12H7N3O/c16-10-6-9(10)7-2-1-3-11-14-15(11)12-8(7)4-5-13-12/h1-6,13H/b3-1-,7-2+                       |
| <b>o-69</b>    |  | 88.2494  | 183.3953 | -5.1615  | 258.8157 | 655.8837 | InChI=1S/C12H7N3O/c16-12-8-6-10-7(14-8)2-1-5-15(10)9-3-4-13-11(9)12/h1-6,13H                                   |
| <b>o-192</b>   |  | 45.3109  | 477.3198 | -20.603  | 124.4462 | 658.8215 | InChI=1S/C12H7N3O/c16-10-6-9(10)15-5-1-2-7-11(14-7)12-8(15)3-4-13-12/h1-6,13H/b5-1-,7-2+                       |
| <b>o-106</b>   |  | 12.5848  | 449.9503 | -5.1905  | 169.0786 | 661.2269 | InChI=1S/C12H7N3O/c16-12-8(14-12)6-10-7-2-1-5-15(10)9-3-4-13-11(7)9/h1-6,13H/b10-6+                            |
| <b>B-172</b>   |  | 113.7871 | 209.4162 | -11.0960 | 187.9011 | 665.9597 | InChI=1S/C12H7N3O/c16-11-10-8(3-4-13-10)7-2-1-5-15-9(6-7)14-12(11)15/h1-6,13H                                  |
| <b>o-209</b>   |  | 156.8627 | 172.7787 | -10.4908 | 195.8172 | 680.1633 | InChI=1S/C12H7N3O/c16-12-7-6-9-11-10(3-4-13-11)15(12)5-1-2-8(7)14-9/h1-6,13H                                   |

|               |                                                                                     |           |           |           |           |            |                                                                                                                    |
|---------------|-------------------------------------------------------------------------------------|-----------|-----------|-----------|-----------|------------|--------------------------------------------------------------------------------------------------------------------|
| <b>x3-9</b>   |    | 81, 1163  | 131, 415  | -6, 0587  | 285, 4218 | 689, 2473  | InChI=1S/C12H7N3O/c16-12-7-6-15-5-1-3-13-10(7)9(12)11-8(15)2-4-14-11/h1-6, 14H/b5-1-, 13-3-                        |
| <b>x4-59</b>  |    | 147, 6248 | 257, 6234 | -13, 1834 | 138, 7773 | 691, 3369  | InChI=1S/C12H7N3O/c16-12-8-3-1-2-7-4-5-13-9(7)11-10(8)14-6-15(11)12/h1-6, 13H/b2-1-, 3-1-, 7-2-, 8-3+, 11-9-       |
| <b>o-62</b>   |    | 175, 5508 | 214, 8686 | -13, 4074 | 185, 8839 | 692, 3203  | InChI=1S/C12H7N3O/c16-12-10-7-2-1-5-15(9(6-7)14-10)8-3-4-13-11(8)12/h1-6, 13H                                      |
| <b>s11-20</b> |    | 171, 9744 | 198, 0843 | -10, 8864 | 174, 1847 | 693, 4302  | InChI=1S/C12H7N3O/c16-12-8-6-15-11(12)10-7(4-5-13-10)2-1-3-9(8)14-15/h1-6, 13H/b3-1-, 7-2-, 11-10+                 |
| <b>B-108</b>  |    | 71, 7100  | 257, 8296 | -7, 7718  | 236, 8467 | 694, 7424  | InChI=1S/C12H7N3O/c16-12-8-2-1-5-15-10(6-9(12)14-15)11-7(8)3-4-13-11/h1-6, 13H/b5-1-, 8-2-                         |
| <b>n-74</b>   |    | 11, 7073  | 429, 6718 | -5, 3127  | 208, 2608 | 695, 1251  | InChI=1S/C12H7N3O/c16-12-7-2-1-5-15(11(12)8-6-14-8)9-3-4-13-10(7)9/h1-6, 13H/b11-8+                                |
| <b>p-13</b>   |    | 12, 9049  | 684, 8786 | -5, 6729  | -10, 75   | 709, 4234  | InChI=1S/C12H7N3O/c16-12-11(14-12)15-9-3-1-2-7-4-5-13-8(7)6-10(9)15/h1-6, 13H/b2-1-, 3-1-, 7-27, 8-6+, 9-3+, 10-6+ |
| <b>A-118</b>  |    | 58, 4707  | 619, 5777 | -27, 1136 | 52, 0104  | 711, 5618  | InChI=1S/C12H7N3O/c16-12-11(9-6-14-9)15(12)5-1-2-7-8-3-4-13-10(7)8/h1-6, 13H/b5-1-, 7-2-, 11-9-                    |
| <b>o-219</b>  |   | 87, 7034  | 197, 5438 | -5, 045   | 265, 9833 | 722, 5407  | InChI=1S/C12H7N3O/c16-12-8-6-7-2-1-5-15(11(7)14-12)9-3-4-13-10(8)9/h1-6, 13H                                       |
| <b>B-218</b>  |  | 76, 0661  | 314, 2668 | -3, 1857  | 248, 8399 | 765, 7155  | InChI=1S/C12H7N3O/c16-11-8-6-15-5-1-2-9(14-12(11)15)7-3-4-13-10(7)8/h1-6, 13H                                      |
| <b>s11-47</b> |  | 195, 679  | 281, 7681 | -15, 7946 | 152, 2319 | 776, 5139  | InChI=1S/C12H7N3O/c16-10-6-8-12-11-7(4-5-13-11)2-1-3-9(14-8)15(10)12/h1-6, 13H/b3-1-, 7-2-, 12-11+                 |
| <b>B-201</b>  |  | 170, 3337 | 121, 7425 | -5, 7893  | 263, 9435 | 804, 0994  | InChI=1S/C12H7N3O/c16-11-8-2-1-5-15-9(6-14-12(11)15)10-7(8)3-4-13-10/h1-6, 13H                                     |
| <b>o-31</b>   |  | 155, 0843 | 274, 2628 | -17, 4045 | 306, 8765 | 863, 3481  | InChI=1S/C12H7N3O/c16-12-9-6-14-11(12)7-2-1-5-15(9)8-3-4-13-10(7)8/h1-6, 13H                                       |
| <b>C-11</b>   |  | 162, 7668 | 259, 6384 | -33, 8478 | 369, 1963 | 960, 8567  | InChI=1S/C12H7N3O/c16-11-9-6-13-4-1-2-7-8-3-5-14-12(8)15(9)10(7)11/h1-6, 14H/b2-1-, 9-6-, 13-4?                    |
| <b>B-259</b>  |  | 194, 8672 | 704, 8841 | -10, 6092 | 76, 6735  | 972, 0031  | InChI=1S/C12H7N3O/c16-12-11(14-12)10-8(3-4-13-10)7-2-1-5-15-6-9(7)15/h1-6, 13H                                     |
| <b>A-92</b>   |  | 296, 6812 | 157, 9234 | -17, 0657 | 157, 6324 | 1007, 5428 | InChI=1S/C12H7N3O/c16-12-14-6-9-7-2-1-5-15(12)11(9)10-8(7)3-4-13-10/h1-6, 13H                                      |
| <b>s11-46</b> |  | 484, 2379 | 525, 8648 | -12, 8248 | 230, 6381 | 1058, 2742 | InChI=1S/C12H7N3O/c16-10-6-8-9-3-1-2-7-4-5-13-11(7)12(8)15(10)14-9/h1-6, 13H/b3-1-, 7-2-, 12-11-                   |
| <b>A2-21</b>  |  | 732, 8354 | 338, 8582 | -21, 9599 | 304, 307  | 1356, 0904 | InChI=1S/C12H7N3O/c16-12-8-2-1-4-14-11-10(15(11)12)6-9-7(8)3-5-13-9/h1-6, 13H/b2-1-, 4-1-, 8-2-, 14-4-, 14-11-     |
| <b>o-237</b>  |  | 238, 8518 | 840, 113  | -21, 3841 | 119, 8159 | 1440, 7624 | InChI=1S/C12H7N3O/c16-12-11-10(3-4-13-11)15-5-1-2-9(15)7-6-8(7)14-12/h1-6, 13H/b14-8-                              |
